# Supplementary material for: Identification of key pathways and genes underlying melatonin-enhanced drought tolerance in cotton
Source: PeerJ. 2025 Sep 23;13:e20005. doi: 10.7717/peerj.20005 (PMC12466508; doi:10.7717/peerj.20005)
Supplement: Supplemental Information 9 [file peerj-13-20005-s009.xlsx]

## Sheet: Figure 1
Leaf RWC
CK	93.8284	92.7049	90.3877
CK_MT	92.8459	89.3327	92.2614
DS	67.8915	64.9562	70.5055
DS_MT	72.5494	68.029	80.8226
PRO
CK	67.9047	75.7414	73.6283	72.5616	50.9387	50.4669	54.5904
CK_MT	77.3826	64.1504	77.3826	64.1504	68.5406	72.1513	65.1967
DS	52.4733	52.6353	44.8519	47.6625	49.5642	52.8979	57.8133
DS_MT	63.7606	61.545	66.6532	59.3294	64.9095	57.7292	62.222
SOD
CK	226.321	221.756	233.333	237.209	227.764	198.835	218.377
CK_MT	183.83	288.242	228.41	292.353	311.474	335.379	355.913
DS	133.462	208.939	110.41	148.973	183.83	215.366	195.133
DS_MT	210.666	263.686	212.705	217.77	203.872	232.171	250.315
									]
POD
CK	384.3	369.4	359.15	426.85	481.15	368.35	384.8
CK_MT	472.35	357.9	396.6	469.45	493.05	418.7	364.9
DS	267	167.95	313.7	260.5	282.85	242.8	289.05
DS_MT	327.2	390.8	323.35	333.45	329.85	371.45	310.2
CAT
CK	561.94	565.267	589.976	600.809	600.88	605.269	606.048
CK_MT	495.104	495.6	512.238	519.672	525.124	536.452	537.372
DS	292.192	337.079	348.336	361.434	364.124	366.248	366.602
DS_MT	374.532	391.241	432.376	437.473	497.441	497.653	502.68
MDA
CK	14.1151	14.1797	15.8916	25.5493	30.7173	32.2677	33.9473
CK_MT	19.2508	21.6733	24.8064	28.3917	30.5881	32.1708	37.2742
DS	30.1359	36.1082	36.7251	37.0158	38.8246	41.9254	54.3932
DS_MT	22.7715	23.9343	25.1617	27.8103	29.1346	29.2315	31.331

## Sheet: Figure 2
CK vs DS				CK vs CK_MT				DS vs DS_MT
Gene ID	log2FoldChange	p_value		Gene ID	log2FoldChange	p_value		Gene ID	log2FoldChange	p_value
Ghi_D06G11136.gene	1.02262	0.802113		Ghi_D06G11136.gene	0	1		Ghi_D02G07321.gene	-9.00418	0.0014038301188
Ghi_D06G11131.gene	0.563245	0.000207931197062		Ghi_D06G11131.gene	0.409716	0.00420180950896		Ghi_A03G07481.gene	-8.95174	3.2859668125e-16
Ghi_D09G09491.gene	-1.63146	3.34724223202e-12		Ghi_D09G09491.gene	-1.48603	6.92755559624e-12		Ghi_D06G00031.gene	-8.3163	1.32416609061e-11
Ghi_D09G09496.gene	-0.409493	0.0799344425225		Ghi_D09G09496.gene	-0.33422	0.142911		Ghi_D01G04251.gene	-7.8465	9.62839306281e-10
Ghi_A10G11046.gene	0	1		Ghi_A10G11046.gene	0	1		Ghi_D11G09776.gene	-6.95666	3.79601870976e-08
Ghi_D12G06081.gene	0	1		Ghi_D12G06081.gene	0	1		Ghi_D07G02966.gene	-6.93912	9.40236653639e-21
Ghi_A09G13351.gene	-0.439737	0.0604039168072		Ghi_A09G13351.gene	0.249231	0.237084		Ghi_A07G01586.gene	-6.87646	9.26749700817e-07
Ghi_D12G06086.gene	0	1		Ghi_D12G06086.gene	0	1		Ghi_A06G04796.gene	-6.87104	1.60216676119e-07
Ghi_A08G06551.gene	-2.40237	0.312167		Ghi_A08G06551.gene	-0.551995	0.759964		Ghi_A09G04281.gene	-6.82623	0.000924126614081
Ghi_A05G14036.gene	-0.268922	0.00965734517209		Ghi_A05G14036.gene	-0.407458	4.65414251606e-05		Ghi_D11G15651.gene	-6.71505	0.000654077941196
Ghi_A07G01566.gene	0.568825	2.38264757256e-08		Ghi_A07G01566.gene	-0.0538292	0.630869		Ghi_D07G02806.gene	-6.67686	0.000116320063936
Ghi_A07G01561.gene	0.766689	0.0379367		Ghi_A07G01561.gene	0.85913	0.0168439697619		Ghi_D05G01986.gene	-6.59446	1.79455107388e-09
Ghi_A05G14031.gene	1.02262	0.802113		Ghi_A05G14031.gene	0	1		Ghi_A08G07621.gene	-6.377	1.02067340933e-06
Ghi_A02G07311.gene	1.94414	0.448901		Ghi_A02G07311.gene	0.0209820752121	0.995585		GhiUnG02671.gene	-6.34647	0.104802
Ghi_A11G18011.gene	-2.45299	3.10715171676e-22		Ghi_A11G18011.gene	-0.432249	0.0371369		GhiUnG02711.gene	-6.34647	0.104802
Ghi_A11G18016.gene	0	1		Ghi_A11G18016.gene	0	1		Ghi_D13G00261.gene	-6.3219	1.24149398666e-06
Ghi_A02G07316.gene	-1.03169	0.340636		Ghi_A02G07316.gene	-0.902929	0.351723		GhiUnG00651.gene	-6.27774	0.108643
Ghi_A01G12676.gene	-3.25342	0.0294987525422		Ghi_A01G12676.gene	-1.29725	0.256433		Ghi_A12G14176.gene	-6.26386	5.40569029878e-06
Ghi_D03G04576.gene	-0.1181	0.684515		Ghi_D03G04576.gene	0.0282009	0.920349		Ghi_A11G04031.gene	-6.25068	1.23371851144e-09
Ghi_A10G06026.gene	0	1		Ghi_A10G06026.gene	0	1		Ghi_D08G07271.gene	-6.15732	3.4551887889e-14
Ghi_A10G06021.gene	2.14052	6.37276597003e-38		Ghi_A10G06021.gene	0.661183	0.000152862492765		Ghi_A07G03051.gene	-5.92149	1.67621174406e-27
Ghi_D03G04571.gene	-0.059291	0.712831		Ghi_D03G04571.gene	-0.0371785	0.816895		Ghi_A08G10416.gene	-5.87945	7.3166613995e-05
Ghi_A01G12671.gene	0.444908	0.0313317552391		Ghi_A01G12671.gene	0.240534	0.193894		Ghi_D07G00581.gene	-5.79218	0.000172937417992
Ghi_D05G00961.gene	-0.307315	0.0655151		Ghi_D05G00961.gene	0.0337357089969	0.822855		Ghi_D07G12661.gene	-5.7358	0.000116731058078
Ghi_A13G14081.gene	-0.157191	0.176402		Ghi_A13G14081.gene	-0.189701	0.0951672818937		Ghi_D07G01541.gene	-5.65926	2.73311294571e-10
Ghi_A13G14086.gene	-0.592729	0.19707		Ghi_A13G14086.gene	-0.0848388	0.8411		Ghi_A05G14671.gene	-5.65802	0.134589
Ghi_D13G02826.gene	1.42037	4.44195762756e-16		Ghi_D13G02826.gene	0.218134	0.332206		Ghi_D02G01731.gene	-5.64287	2.78812048354e-06
Ghi_A12G13276.gene	1.02262	0.802113		Ghi_A12G13276.gene	0.982753	0.809677		Ghi_A11G03601.gene	-5.63275	1.10466297573e-06
Ghi_D05G12921.gene	0.314086	0.10737		Ghi_D05G12921.gene	0.404956	0.0392885653119		Ghi_A01G04011.gene	-5.62133	4.06642458181e-05
Ghi_A12G13271.gene	-0.649096	4.69669130855e-13		Ghi_A12G13271.gene	-0.405963	8.21607728127e-06		Ghi_A05G16556.gene	-5.53127	3.88384080231e-06
Ghi_D13G02821.gene	0.427522	0.00525704021104		Ghi_D13G02821.gene	0.00671019963446	0.958906		GhiUnG00931.gene	-5.51113	0.159477
Ghi_D09G11096.gene	0.454966	0.000148006715625		Ghi_D09G11096.gene	0.118215	0.320623		Ghi_A05G13766.gene	-5.50911	0.000225076539609
Ghi_D01G06576.gene	-0.969013	0.0645659270041		Ghi_D01G06576.gene	-0.15916	0.716854		Ghi_D08G11931.gene	-5.50869	0.000275544111504
Ghi_A11G00021.gene	-0.232265	0.260259		Ghi_A11G00021.gene	-0.0715356	0.707708		GhiUnG00646.gene	-5.44348	0.164717
Ghi_A11G00026.gene	0.117199	0.666107		Ghi_A11G00026.gene	-0.0986616	0.701939		Ghi_A02G01081.gene	-5.34944	0.000703252655752
Ghi_D02G04436.gene	-0.600253	0.69599		Ghi_D02G04436.gene	-0.175125	0.911354		Ghi_D07G08141.gene	-5.34016	0.163103
Ghi_D09G11091.gene	1.02262	0.802113		Ghi_D09G11091.gene	0	1		GhiUnG03001.gene	-5.32845	0.173924
Ghi_A10G14071.gene	1.98063	3.30494009856e-18		Ghi_A10G14071.gene	-0.591431	0.0467513		Ghi_A09G14086.gene	-5.32638	0.000513474235804
Ghi_A04G01346.gene	1.02262	0.802113		Ghi_A04G01346.gene	0	1		Ghi_D03G10081.gene	-5.26367	0.000880116266086
Ghi_D03G02801.gene	0	1		Ghi_D03G02801.gene	0	1		GhiUnG01031.gene	-5.24175	0.181118
Ghi_D03G02806.gene	0	1		Ghi_D03G02806.gene	0	1		Ghi_A07G07726.gene	-5.1931	0.00122915767688
Ghi_A10G14076.gene	0.499572	0.50459		Ghi_A10G14076.gene	0.305265	0.665219		Ghi_D02G09991.gene	-5.18006	0.00100436833795
Ghi_A05G05871.gene	3.09848	1.13813575208e-40		Ghi_A05G05871.gene	0.0223517595869	0.938778		Ghi_D10G09476.gene	-5.17476	3.33719878195e-21
Ghi_A10G03421.gene	0	1		Ghi_A10G03421.gene	0	1		Ghi_A09G07601.gene	-5.17199	8.9020395883e-06
Ghi_A08G11356.gene	0	1		Ghi_A08G11356.gene	0	1		Ghi_A05G16036.gene	-5.0373	0.0017101131853
Ghi_A05G12601.gene	1.02927	0.639178		Ghi_A05G12601.gene	-0.889038	0.768405		Ghi_A07G08691.gene	-5.00768	2.78165909254e-09
Ghi_A08G11351.gene	0	1		Ghi_A08G11351.gene	0	1		Ghi_D02G11111.gene	-5.00715	0.201696
Ghi_A05G05876.gene	0.131474	0.966059		Ghi_A05G05876.gene	-1.805	0.655082		Ghi_A08G04406.gene	-4.96773	0.00242880200509
Ghi_A05G12606.gene	0	1		Ghi_A05G12606.gene	0	1		Ghi_A11G14561.gene	-4.91964	0.209799
Ghi_D12G15451.gene	0	1		Ghi_D12G15451.gene	0.982753	0.809677		Ghi_A11G13561.gene	-4.87323	0.00337984655249
Ghi_D11G09221.gene	-1.93462	0.0464017809056		Ghi_D11G09221.gene	0.97153	0.141706		Ghi_A07G12821.gene	-4.84576	0.00520314335799
Ghi_D11G09226.gene	-5.48966	0.000368322459749		Ghi_D11G09226.gene	2.37839	2.11220390769e-06		Ghi_A10G01476.gene	-4.81982	0.217784
Ghi_D12G15456.gene	-0.965548	0.0392752783043		Ghi_D12G15456.gene	0.254141	0.504277		Ghi_D11G10731.gene	-4.81472	0.00126584492106
Ghi_A02G05811.gene	0	1		Ghi_A02G05811.gene	0	1		Ghi_D01G00816.gene	-4.80207	9.86394673262e-05
Ghi_A02G02841.gene	-3.26062	0.0207315910999		Ghi_A02G02841.gene	-0.134732	0.872513		Ghi_D06G05841.gene	-4.77755	0.00475166561051
Ghi_A02G02846.gene	0.0608420038673	0.987615		Ghi_A02G02846.gene	1.50843	0.578286		Ghi_A01G03281.gene	-4.76552	6.3654121124e-05
Ghi_A03G05916.gene	0.554814	0.000682645909861		Ghi_A03G05916.gene	0.288664	0.0770547503384		Ghi_D01G03741.gene	-4.76549	0.00653752988734
Ghi_A02G05816.gene	0.349408	0.104414		Ghi_A02G05816.gene	0.110213	0.620515		Ghi_A07G05961.gene	-4.72384	4.71053307515e-15
Ghi_A11G13401.gene	0	1		Ghi_A11G13401.gene	0	1		Ghi_A02G02961.gene	-4.69714	0.00711976740646
Ghi_A05G01371.gene	1.33483	1.7146095762e-20		Ghi_A05G01371.gene	-0.0250756	0.874795		Ghi_A01G02296.gene	-4.68804	1.14190666476e-12
Ghi_A05G01376.gene	-0.851011	0.262352		Ghi_A05G01376.gene	-0.717551	0.260417		Ghi_A05G15146.gene	-4.68424	0.00614186439066
Ghi_A04G02406.gene	0	1		Ghi_A04G02406.gene	0	1		Ghi_D05G05196.gene	-4.61182	0.24019
Ghi_D07G06916.gene	-0.90093	0.825256		Ghi_D07G06916.gene	0.0209818890722	0.995622		Ghi_A11G14661.gene	-4.5812	0.210416
Ghi_A13G04641.gene	-1.8237	6.22643917854e-08		Ghi_A13G04641.gene	0.521785	0.0509234104309		Ghi_D11G06841.gene	-4.57839	0.00913416166329
Ghi_A06G03706.gene	-4.79256	0.000923986260149		Ghi_A06G03706.gene	-0.354312	0.611655		Ghi_D08G03676.gene	-4.57272	3.35401741002e-05
Ghi_A09G11981.gene	0.122927	0.402475		Ghi_A09G11981.gene	-0.210387	0.178171		Ghi_D09G07596.gene	-4.55316	0.00962927880082
Ghi_A09G11986.gene	8.33782	5.69311831503e-12		Ghi_A09G11986.gene	4.08296	0.0107609467435		Ghi_D13G00191.gene	-4.55235	5.97808850025e-05
Ghi_A06G03701.gene	-1.16008	3.4179939515e-09		Ghi_A06G03701.gene	-0.309625	0.0663654014652		Ghi_A05G14706.gene	-4.51985	3.54767805658e-06
Ghi_A06G09341.gene	1.92051	0.620023		Ghi_A06G09341.gene	4.57469	0.0109305343597		Ghi_A05G09976.gene	-4.46293	0.0152448300328
Ghi_A08G00821.gene	-1.15356	9.24144125432e-16		Ghi_A08G00821.gene	-0.65252	3.31046945408e-07		Ghi_D07G08226.gene	-4.43706	0.00332851780557
Ghi_A06G09346.gene	0	1		Ghi_A06G09346.gene	0	1		Ghi_D11G15311.gene	-4.43492	2.09390612828e-05
Ghi_A04G03576.gene	-1.02983	0.31947		Ghi_A04G03576.gene	-0.527472	0.58252		Ghi_D04G02381.gene	-4.39376	5.09128823604e-73
Ghi_D06G12446.gene	0	1		Ghi_D06G12446.gene	0	1		Ghi_D06G02176.gene	-4.38793	4.56788355482e-08
GhiUnG00901.gene	0	1		GhiUnG00901.gene	0	1		Ghi_A12G00226.gene	-4.38298	0.00430849875642
Ghi_A03G02351.gene	-1.2628	2.45878050259e-09		Ghi_A03G02351.gene	-0.854194	4.68090071617e-07		Ghi_A05G07726.gene	-4.37416	0.265717
Ghi_A03G02356.gene	-0.624576	0.0131902565741		Ghi_A03G02356.gene	-0.172601	0.499461		Ghi_A10G00206.gene	-4.35666	0.0273512899782
GhiUnG00906.gene	-2.27866	0.000896813493917		GhiUnG00906.gene	-0.0600609	0.92497		Ghi_D08G05981.gene	-4.34398	4.48815502757e-06
Ghi_D06G12441.gene	0	1		Ghi_D06G12441.gene	0	1		Ghi_D10G08526.gene	-4.34157	4.42526706232e-08
Ghi_D13G12981.gene	0.613497	0.30854		Ghi_D13G12981.gene	-0.268426	0.682945		Ghi_D11G11701.gene	-4.33072	0.0173325261865
Ghi_D09G08176.gene	1.81522	4.74438368497e-39		Ghi_D09G08176.gene	0.29932	0.0106294		Ghi_A09G11791.gene	-4.33029	0.0181950120161
Ghi_A13G01591.gene	0.0503778878374	0.980132		Ghi_A13G01591.gene	1.8831	0.206537		Ghi_A03G02941.gene	-4.32247	0.0176791590071
Ghi_D09G08171.gene	2.25268	0.358444		Ghi_D09G08171.gene	0.0209818436177	0.99563		Ghi_D09G00341.gene	-4.30997	7.68672012352e-20
Ghi_A05G15346.gene	0	1		Ghi_A05G15346.gene	0	1		Ghi_A01G09861.gene	-4.29536	0.00471480968175
Ghi_A07G01761.gene	-0.315839	0.48181		Ghi_A07G01761.gene	-0.0911573	0.831061		Ghi_D13G01886.gene	-4.28012	9.21761094622e-15
Ghi_A07G04936.gene	0	1		Ghi_A07G04936.gene	0	1		Ghi_A09G04276.gene	-4.27123	7.0901306237e-18
Ghi_A07G04931.gene	0	1		Ghi_A07G04931.gene	0	1		Ghi_D05G09056.gene	-4.26192	0.00183590691391
Ghi_A04G07651.gene	-1.42022	0.57394		Ghi_A04G07651.gene	0.0181661813098	0.992925		Ghi_A11G08226.gene	-4.23685	0.0580184367464
Ghi_A05G15341.gene	-1.58702	0.000119892497484		Ghi_A05G15341.gene	-0.381465	0.241326		Ghi_D10G07956.gene	-4.21841	0.00625676155184
Ghi_A12G07986.gene	0	1		Ghi_A12G07986.gene	0	1		Ghi_A13G09081.gene	-4.2075	0.0274936082348
Ghi_D05G11451.gene	0.59164	0.226508		Ghi_D05G11451.gene	0.322493	0.527903		Ghi_D03G09276.gene	-4.20421	0.0392492440012
Ghi_A09G15031.gene	0	1		Ghi_A09G15031.gene	0.982753	0.809677		Ghi_D05G03646.gene	-4.19769	0.0387827235369
Ghi_D05G11456.gene	0.792656	0.233085		Ghi_D05G11456.gene	0.423001	0.558022		Ghi_D08G05106.gene	-4.18919	0.0253161474565
Ghi_A12G07981.gene	0.0608420415595	0.987637		Ghi_A12G07981.gene	0.92028	0.778571		Ghi_D06G03781.gene	-4.18573	0.0469049212923
Ghi_A03G07651.gene	0.540057	6.34589642292e-08		Ghi_A03G07651.gene	0.0129902725501	0.900459		Ghi_A01G05011.gene	-4.1844	0.0255927371831
Ghi_A11G05016.gene	0.192711	0.803963		Ghi_A11G05016.gene	0.828897	0.240642		Ghi_D08G09351.gene	-4.16907	0.0421628279399
Ghi_D02G09566.gene	0.78198	2.95162580213e-10		Ghi_D02G09566.gene	0.443558	0.00189214378352		Ghi_A10G05481.gene	-4.15927	0.0450833497618
Ghi_D02G09561.gene	1.19226	0.0665500806059		Ghi_D02G09561.gene	-0.137671	0.871517		Ghi_A04G07636.gene	-4.13806	0.0691723210035
Ghi_A11G05011.gene	4.0922	5.96338446188e-109		Ghi_A11G05011.gene	1.2139	1.38772393375e-08		Ghi_A05G21376.gene	-4.10668	0.0161438297394
Ghi_A03G07656.gene	-0.90093	0.825256		Ghi_A03G07656.gene	-0.9408	0.817655		Ghi_D01G00836.gene	-4.09532	0.0106097931533
Ghi_A12G03606.gene	0.888473	4.7251077435e-08		Ghi_A12G03606.gene	-0.0868868	0.634849		GhiUnG01151.gene	-4.08457	0.142249
Ghi_D05G02371.gene	-1.02593	2.05419206643e-08		Ghi_D05G02371.gene	-0.478349	0.00575456168961		Ghi_A05G10901.gene	-4.0786	0.0573111372118
Ghi_A12G03601.gene	0.00487810980107	0.960818		Ghi_A12G03601.gene	-0.0873141	0.381649		Ghi_A03G07131.gene	-4.06836	0.0517202867243
Ghi_D02G03686.gene	0.83945	0.0542398475242		Ghi_D02G03686.gene	0.408073	0.380357		Ghi_D02G09651.gene	-4.06118	0.00245115228016
Ghi_A07G12281.gene	-1.03657	3.5030754679e-06		Ghi_A07G12281.gene	-0.477271	0.00878308115183		Ghi_D03G01956.gene	-4.05692	6.58963711172e-17
Ghi_A09G09241.gene	0	1		Ghi_A09G09241.gene	0	1		Ghi_D13G07301.gene	-4.04645	0.000152767414183
Ghi_A09G09246.gene	0	1		Ghi_A09G09246.gene	0	1		Ghi_A01G00171.gene	-4.04234	0.0371299432493
Ghi_A07G12286.gene	-0.114074	0.940477		Ghi_A07G12286.gene	-0.134546	0.925362		Ghi_D06G09166.gene	-4.03884	0.0817002203702
Ghi_D02G03681.gene	0	1		Ghi_D02G03681.gene	0	1		Ghi_D13G08986.gene	-4.03759	0.0388638350523
Ghi_A08G14451.gene	3.50256	0.137028		Ghi_A08G14451.gene	4.58105	0.0101002576786		Ghi_D12G14451.gene	-4.03224	0.0379328821578
Ghi_D11G15956.gene	2.65466	0.0133721944706		Ghi_D11G15956.gene	2.45247	0.0270316699716		Ghi_A12G03466.gene	-4.02286	1.44339875014e-05
Ghi_A08G14456.gene	-0.290041	0.00533133235542		Ghi_A08G14456.gene	-0.244758	0.0178247671035		Ghi_D12G13806.gene	-3.98349	1.84273523257e-14
Ghi_D11G15951.gene	6.53379	3.44544153931e-13		Ghi_D11G15951.gene	2.24814	0.119452		Ghi_A02G08341.gene	-3.97515	6.37809602999e-29
Ghi_D13G03236.gene	0.404923	0.359328		Ghi_D13G03236.gene	0.314538	0.441708		Ghi_D03G01961.gene	-3.96294	2.63633090923e-20
Ghi_D03G04291.gene	0.894603	2.49906167095e-11		Ghi_D03G04291.gene	0.326661	0.0301117806596		Ghi_A12G13261.gene	-3.9347	0.0237328585943
Ghi_D02G05906.gene	0	1		Ghi_D02G05906.gene	0	1		Ghi_D11G04336.gene	-3.92921	0.000153716144911
Ghi_A13G13056.gene	0.0248342797553	0.845389		Ghi_A13G13056.gene	0.185073	0.117648		Ghi_D06G02181.gene	-3.91199	0.000741554278696
Ghi_A13G13051.gene	0.971186	0.0630372833402		Ghi_A13G13051.gene	0.405258	0.46895		Ghi_D07G10176.gene	-3.90787	0.0774333
Ghi_D02G05901.gene	0	1		Ghi_D02G05901.gene	0	1		Ghi_A10G08781.gene	-3.90623	1.488801017e-29
Ghi_A11G05781.gene	2.69628	2.80854657792e-61		Ghi_A11G05781.gene	1.13508	2.99498728001e-08		Ghi_A02G01881.gene	-3.90036	0.0179619514671
Ghi_A11G08566.gene	0	1		Ghi_A11G08566.gene	0	1		Ghi_A06G06681.gene	-3.89153	0.0196512381712
Ghi_A11G08561.gene	-0.724057	0.0329557327213		Ghi_A11G08561.gene	-0.241308	0.471737		Ghi_D11G15436.gene	-3.89121	0.0163858
Ghi_A05G17821.gene	0	1		Ghi_A05G17821.gene	0	1		Ghi_D09G03426.gene	-3.88969	0.0569896216348
Ghi_A07G11886.gene	1.49633	0.63106		Ghi_A07G11886.gene	3.37609	0.0570047981951		Ghi_D06G01321.gene	-3.88001	0.0759751738201
Ghi_A05G10831.gene	-1.82184	1.39430288823e-34		Ghi_A05G10831.gene	-0.269468	0.0154627223073		Ghi_A05G19186.gene	-3.87822	0.0542302951867
Ghi_D12G00456.gene	-0.103946	0.501192		Ghi_D12G00456.gene	-0.0642286	0.687553		Ghi_A05G20846.gene	-3.87822	0.0542302951867
Ghi_D12G00451.gene	0.0565283588839	0.943673		Ghi_D12G00451.gene	0.0872322041348	0.912684		Ghi_A05G23271.gene	-3.8781	2.75859650574e-15
Ghi_A05G10836.gene	-0.482813	0.000856096396954		Ghi_A05G10836.gene	0.199306	0.0955609636129		Ghi_A05G13281.gene	-3.87449	0.0819763799875
Ghi_A07G11881.gene	-0.908711	4.79496290745e-05		Ghi_A07G11881.gene	-0.238946	0.248423		Ghi_A06G02731.gene	-3.87394	1.1047638048e-08
Ghi_A05G16881.gene	0	1		Ghi_A05G16881.gene	0	1		Ghi_D05G08391.gene	-3.87357	0.0587666079743
Ghi_A05G07436.gene	0.342769	0.00992179583577		Ghi_A05G07436.gene	-0.150689	0.292706		Ghi_D02G01061.gene	-3.86891	0.106863
Ghi_A02G06541.gene	0	1		Ghi_A02G06541.gene	0	1		Ghi_A13G12516.gene	-3.86689	0.0543794636706
Ghi_A05G00426.gene	-0.413175	0.0079465280085		Ghi_A05G00426.gene	-0.33448	0.0334698201093		Ghi_A05G21381.gene	-3.86629	0.0749098337513
Ghi_A05G00421.gene	-2.5071	0.000469258477323		Ghi_A05G00421.gene	-0.877073	0.116315		Ghi_D08G05271.gene	-3.85605	0.0590844561424
Ghi_A02G06546.gene	-0.203026	0.162191		Ghi_A02G06546.gene	-0.321884	0.0137651635018		Ghi_A09G08421.gene	-3.83742	0.0795358274279
Ghi_A05G07431.gene	-1.15054	4.82684207642e-07		Ghi_A05G07431.gene	-0.507427	0.0148980698882		Ghi_D07G12181.gene	-3.81606	0.0227200578318
Ghi_A02G09256.gene	-0.90093	0.825256		Ghi_A02G09256.gene	-0.9408	0.817655		Ghi_D08G13001.gene	-3.8095	0.0101899522237
Ghi_A08G06451.gene	0	1		Ghi_A08G06451.gene	0	1		Ghi_A09G02146.gene	-3.80683	0.0221122
Ghi_A11G06096.gene	0.0702376893619	0.574241		Ghi_A11G06096.gene	0.00211401502184	0.987116		Ghi_A01G09866.gene	-3.7914	0.00574450704782
Ghi_A11G06091.gene	0.769888	0.155378		Ghi_A11G06091.gene	0.833005	0.122869		Ghi_A07G00646.gene	-3.78432	8.99876499958e-15
Ghi_A08G06456.gene	1.02262	0.802113		Ghi_A08G06456.gene	0	1		Ghi_A02G02966.gene	-3.76122	2.94190596892e-19
Ghi_A02G09251.gene	0	1		Ghi_A02G09251.gene	0	1		Ghi_D02G06051.gene	-3.76117	0.000641882641165
Ghi_A05G06746.gene	-0.228231	0.390334		Ghi_A05G06746.gene	-0.0232498	0.926825		GhiUnG01156.gene	-3.75489	0.0122431154846
Ghi_A08G10486.gene	-0.732951	0.00133443733617		Ghi_A08G10486.gene	-0.222641	0.28545		Ghi_D11G02871.gene	-3.7292	0.0283542845915
Ghi_A04G05146.gene	0	1		Ghi_A04G05146.gene	1.87697	0.618708		GhiUnG02701.gene	-3.72178	0.13223
Ghi_A08G10481.gene	-2.04941	1.08690142317e-42		Ghi_A08G10481.gene	-0.714216	3.48650573353e-07		GhiUnG00641.gene	-3.72178	0.13223
Ghi_A05G06741.gene	0.442553	0.00138453778548		Ghi_A05G06741.gene	0.00572277155567	0.968874		GhiUnG00781.gene	-3.72178	0.13223
Ghi_A02G04031.gene	-1.42232	0.109072		Ghi_A02G04031.gene	-2.93155	0.00437245047106		Ghi_A06G09796.gene	-3.71584	0.0242927631124
Ghi_D10G12271.gene	0	1		Ghi_D10G12271.gene	0	1		Ghi_A11G18006.gene	-3.71261	8.1136055953e-05
Ghi_A02G01001.gene	0.189757	0.55468		Ghi_A02G01001.gene	1.22284	9.0599785717e-07		Ghi_A05G08041.gene	-3.69515	0.101422
Ghi_D04G08321.gene	0	1		Ghi_D04G08321.gene	0	1		Ghi_D13G01996.gene	-3.69515	0.101422
Ghi_A02G01006.gene	-2.99078	1.45587045361e-12		Ghi_A02G01006.gene	0.774766	0.00345853865546		Ghi_A08G11376.gene	-3.68767	0.0813446321942
Ghi_D10G12276.gene	2.37107	0.0567894176067		Ghi_D10G12276.gene	2.17805	0.0782095236838		Ghi_D07G01316.gene	-3.68261	0.111287
Ghi_A02G04036.gene	1.02262	0.802113		Ghi_A02G04036.gene	0.982753	0.809677		Ghi_A05G13056.gene	-3.68157	0.0834795824797
Ghi_D03G01056.gene	0	1		Ghi_D03G01056.gene	0	1		Ghi_D05G00116.gene	-3.6808	0.0793847544209
Ghi_A10G01346.gene	-0.324657	0.268665		Ghi_A10G01346.gene	0.146445	0.583684		GhiUnG00286.gene	-3.68036	0.103879
Ghi_A10G01341.gene	-4.2957	5.6824254147e-09		Ghi_A10G01341.gene	-2.74697	3.74488719137e-07		Ghi_A07G02886.gene	-3.67625	0.141054
Ghi_D03G01051.gene	0	1		Ghi_D03G01051.gene	0	1		Ghi_D12G14636.gene	-3.67625	0.141054
Ghi_D10G01541.gene	3.08221	5.41014757686e-06		Ghi_D10G01541.gene	0.0114810013401	0.991685		Ghi_A09G01801.gene	-3.67469	0.0802563180485
Ghi_A04G05141.gene	-1.38085	9.54933453336e-07		Ghi_A04G05141.gene	-0.751734	0.0042326349075		Ghi_D02G01531.gene	-3.67398	0.0833124896847
Ghi_A10G13861.gene	0	1		Ghi_A10G13861.gene	0	1		Ghi_A06G06436.gene	-3.67132	7.57639780357e-06
Ghi_A10G13866.gene	0	1		Ghi_A10G13866.gene	0	1		Ghi_A01G03881.gene	-3.66904	0.113646
Ghi_A05G23556.gene	-0.458601	0.0397473557268		Ghi_A05G23556.gene	0.211405	0.257741		Ghi_A07G13716.gene	-3.66784	0.0812364942013
Ghi_A01G07301.gene	0	1		Ghi_A01G07301.gene	0	1		Ghi_D05G07836.gene	-3.66689	0.106167
Ghi_A12G14556.gene	1.06697	4.14275226635e-05		Ghi_A12G14556.gene	-0.0469617	0.881467		Ghi_A13G10241.gene	-3.66161	0.0851349284213
Ghi_A12G14551.gene	0.830023	5.48444300324e-06		Ghi_A12G14551.gene	0.13572	0.501937		Ghi_D08G14406.gene	-3.65462	0.0874553274864
Ghi_A03G08521.gene	0	1		Ghi_A03G08521.gene	0	1		Ghi_A10G12996.gene	-3.64741	0.0934947026516
Ghi_A03G08526.gene	0	1		Ghi_A03G08526.gene	0	1		Ghi_A05G21731.gene	-3.64148	4.58446216956e-56
Ghi_A06G01011.gene	-0.819533	0.789233		Ghi_A06G01011.gene	0.0347495599924	0.989189		Ghi_D11G14361.gene	-3.63927	0.118924
Ghi_D07G07721.gene	-2.45489	3.63747920805e-58		Ghi_D07G07721.gene	-0.0664033	0.525919		Ghi_A09G08531.gene	-3.62515	3.92524897755e-99
Ghi_A03G08861.gene	0.0992564751117	0.324301		Ghi_A03G08861.gene	-0.0507202	0.648738		Ghi_D05G13641.gene	-3.62397	0.15162
Ghi_D12G01411.gene	0.268043	0.112373		Ghi_D12G01411.gene	0.343001	0.0350543363908		Ghi_A12G06646.gene	-3.59999	0.0022438602439
Ghi_D12G01416.gene	-0.513891	0.646045		Ghi_D12G01416.gene	-0.978618	0.419087		Ghi_A13G14051.gene	-3.5976	0.00126965470087
Ghi_A08G13266.gene	0.415395	0.0730635329084		Ghi_A08G13266.gene	-0.0174152	0.941822		Ghi_D12G09301.gene	-3.58839	0.0354948939313
Ghi_D02G09646.gene	1.02262	0.802113		Ghi_D02G09646.gene	0	1		Ghi_D08G01631.gene	-3.57012	0.000208242722173
Ghi_A06G08586.gene	0	1		Ghi_A06G08586.gene	0	1		Ghi_A09G13516.gene	-3.56643	6.32282530843e-08
Ghi_A12G09721.gene	-3.00179	7.71554299175e-21		Ghi_A12G09721.gene	-0.0623173	0.776114		Ghi_A09G05616.gene	-3.54757	6.42535385464e-09
Ghi_A12G09726.gene	-3.80301	0.0754557090868		Ghi_A12G09726.gene	1.96885	0.0295300563542		Ghi_A06G12546.gene	-3.52643	0.00457377112105
Ghi_A09G10216.gene	-0.0381317	0.821964		Ghi_A09G10216.gene	0.284361	0.0732297107731		Ghi_A01G02291.gene	-3.51253	9.42406694037e-15
Ghi_D04G07181.gene	0	1		Ghi_D04G07181.gene	0.982753	0.809677		Ghi_D10G13411.gene	-3.51221	0.045058
Ghi_A06G08911.gene	0	1		Ghi_A06G08911.gene	0	1		Ghi_A10G02061.gene	-3.50466	0.0435715716725
Ghi_A13G06141.gene	1.31981	6.19025165828e-05		Ghi_A13G06141.gene	1.35151	9.68032173376e-05		Ghi_A09G12616.gene	-3.50107	0.0416093897451
Ghi_D04G07186.gene	0.904504	2.33198507237e-07		Ghi_D04G07186.gene	-0.0140562	0.94366		Ghi_D03G09066.gene	-3.48983	0.0430779306998
Ghi_A09G10211.gene	-0.265498	0.12076		Ghi_A09G10211.gene	0.0553372514056	0.724058		Ghi_D09G10871.gene	-3.48535	0.0116167
Ghi_A07G03686.gene	-2.83094	7.59490851617e-25		Ghi_A07G03686.gene	-0.305182	0.0975977610389		Ghi_A05G08376.gene	-3.48314	0.14247
Ghi_A08G13681.gene	-0.957287	2.32175196174e-05		Ghi_A08G13681.gene	-0.161526	0.414069		Ghi_A08G04651.gene	-3.48314	0.14247
Ghi_A12G01111.gene	0	1		Ghi_A12G01111.gene	0	1		Ghi_D11G16481.gene	-3.47932	0.0438732459494
Ghi_A12G01116.gene	0.268087	0.0505825		Ghi_A12G01116.gene	0.0600666	0.649482		Ghi_A13G05656.gene	-3.47582	0.142508
Ghi_A08G13686.gene	0.201728	0.477676		Ghi_A08G13686.gene	0.198944	0.48211		Ghi_A06G07741.gene	-3.47488	0.0460325554075
Ghi_A07G03681.gene	0.992189	1.01452832292e-31		Ghi_A07G03681.gene	0.261954	0.00310190310796		Ghi_D09G06461.gene	-3.47439	0.122486
Ghi_D09G02141.gene	-2.17663	0.212971		Ghi_D09G02141.gene	-0.303226	0.798029		Ghi_A10G11496.gene	-3.47145	0.0605348
Ghi_D06G11491.gene	-0.90093	0.825256		Ghi_D06G11491.gene	-0.9408	0.817655		Ghi_D12G00176.gene	-3.46854	0.145502
Ghi_D13G13341.gene	-1.42581	0.00311293177088		Ghi_D13G13341.gene	-0.868864	0.0368242543182		Ghi_D07G02466.gene	-3.46716	0.119065
Ghi_A12G14881.gene	-0.474341	0.0282526504748		Ghi_A12G14881.gene	-0.260875	0.180799		Ghi_A13G07361.gene	-3.46716	0.119065
Ghi_A12G14886.gene	14.0308	1.90227628822e-42		Ghi_A12G14886.gene	-1.805	0.655082		Ghi_D07G05716.gene	-3.46431	7.11481999255e-17
Ghi_D06G11496.gene	-2.06511	3.27286028899e-06		Ghi_D06G11496.gene	0.723351	0.0233472555838		Ghi_A08G10816.gene	-3.46004	0.120395
Ghi_D09G02146.gene	0	1		Ghi_D09G02146.gene	0	1		Ghi_D04G08211.gene	-3.46004	0.120395
Ghi_A03G00866.gene	1.12528	1.03382802319e-09		Ghi_A03G00866.gene	0.207049	0.289195		Ghi_A11G05466.gene	-3.46004	0.120395
Ghi_A12G05601.gene	5.00284	4.86787233696e-08		Ghi_A12G05601.gene	2.87087	0.0082747770917		Ghi_A03G11561.gene	-3.46004	0.120395
Ghi_A12G05606.gene	0	1		Ghi_A12G05606.gene	0	1		Ghi_D06G01981.gene	-3.46004	0.120395
Ghi_A03G00861.gene	0.0608423738001	0.987832		Ghi_A03G00861.gene	-0.9408	0.817655		Ghi_D10G12631.gene	-3.45921	0.120542
Ghi_D05G05361.gene	-1.17452	1.06277250688e-10		Ghi_D05G05361.gene	-0.0857582	0.5316		Ghi_D03G08721.gene	-3.45385	0.187869
Ghi_A11G09216.gene	0.269591	0.73462		Ghi_A11G09216.gene	1.09173	0.0981998879046		Ghi_A03G09466.gene	-3.45291	0.126525
Ghi_D04G01921.gene	-0.0275901	0.863894		Ghi_D04G01921.gene	-0.117178	0.482322		Ghi_D10G11941.gene	-3.45205	0.118413
Ghi_A01G04941.gene	3.48928	0.179227		Ghi_A01G04941.gene	0	1		Ghi_D13G13046.gene	-3.45205	0.118413
Ghi_A01G04946.gene	0.0894704243276	0.731358		Ghi_A01G04946.gene	-0.257319	0.351365		Ghi_A12G01381.gene	-3.45205	0.118413
Ghi_D04G01926.gene	1.51246	0.584071		Ghi_D04G01926.gene	1.50843	0.578286		Ghi_D13G04466.gene	-3.45205	0.118413
Ghi_A11G09211.gene	0	1		Ghi_A11G09211.gene	0	1		Ghi_D11G07621.gene	-3.45205	0.118413
Ghi_D08G12261.gene	-2.40341	0.473098		Ghi_D08G12261.gene	-2.44501	0.445652		Ghi_D10G00896.gene	-3.45125	0.147665
Ghi_D10G12856.gene	0.978887	1.0904401607e-08		Ghi_D10G12856.gene	0.190512	0.322964		Ghi_A05G06091.gene	-3.44548	0.156206
Ghi_A01G07416.gene	0	1		Ghi_A01G07416.gene	0	1		Ghi_D10G01316.gene	-3.44548	0.156206
Ghi_A01G07411.gene	-1.25875	6.87120109036e-11		Ghi_A01G07411.gene	-0.654198	0.000182495588238		Ghi_D13G02006.gene	-3.44548	0.156206
Ghi_D10G12851.gene	0.663752	0.000984384268095		Ghi_D10G12851.gene	0.20729	0.34654		Ghi_D11G02111.gene	-3.44488	0.123259
Ghi_D08G12266.gene	-4.33393	1.0451076445e-30		Ghi_D08G12266.gene	-1.25053	4.92324941417e-07		Ghi_D09G02926.gene	-3.44403	0.12341
Ghi_A08G08206.gene	0.522205	0.478721		Ghi_A08G08206.gene	0.533567	0.498953		Ghi_D11G04721.gene	-3.43681	0.124797
Ghi_A04G07111.gene	-1.8114	0.644096		Ghi_A04G07111.gene	-0.889038	0.768405		Ghi_A05G04076.gene	-3.43681	0.124797
Ghi_A07G13621.gene	0	1		Ghi_A07G13621.gene	0	1		Ghi_A05G08781.gene	-3.43547	0.152477
Ghi_A12G12481.gene	0.0608423	0.987792		Ghi_A12G12481.gene	-0.9408	0.817655		Ghi_A01G06081.gene	-3.43541	2.58397940161e-06
Ghi_A11G07326.gene	-0.90093	0.825256		Ghi_A11G07326.gene	0.0209819702283	0.995606		Ghi_A05G15206.gene	-3.42885	0.15247
Ghi_A11G07321.gene	0.625337	0.404395		Ghi_A11G07321.gene	0.580865	0.432923		Ghi_A06G06756.gene	-3.42274	0.000840471491092
Ghi_A12G12486.gene	0	1		Ghi_A12G12486.gene	0	1		Ghi_D05G01401.gene	-3.4204	0.155757
Ghi_A07G13626.gene	2.19019	3.46188540281e-13		Ghi_A07G13626.gene	0.248359	0.542848		Ghi_D03G05981.gene	-3.4204	0.155757
Ghi_A05G16066.gene	0.884933	5.99136533635e-07		Ghi_A05G16066.gene	0.633693	0.000522489253982		Ghi_D01G01526.gene	-3.4117	0.163558
Ghi_D13G04376.gene	0.0599653024524	0.936529		Ghi_D13G04376.gene	0.260853	0.710252		Ghi_A05G08216.gene	-3.4117	0.163558
Ghi_D13G04371.gene	0.492526	4.80383349696e-05		Ghi_D13G04371.gene	0.26977	0.0290336573264		Ghi_D10G04571.gene	-3.41147	0.0161071048572
Ghi_A05G16061.gene	-0.102678	0.559351		Ghi_A05G16061.gene	-0.187557	0.298348		Ghi_D10G10001.gene	-3.40853	1.15253210532e-05
Ghi_A05G17796.gene	-0.0161874	0.97377		Ghi_A05G17796.gene	0.410072	0.380187		Ghi_A12G02101.gene	-3.40175	0.200263
Ghi_D11G02126.gene	-1.76967	1.33205332228e-11		Ghi_D11G02126.gene	-0.820215	0.000220052117211		Ghi_A13G05796.gene	-3.40175	0.200263
Ghi_A05G18931.gene	-0.829479	1.15148573074e-09		Ghi_A05G18931.gene	-0.509422	5.02623610832e-05		Ghi_D03G04916.gene	-3.38869	0.0617978362183
Ghi_A05G18936.gene	-1.19732	5.24443986364e-05		Ghi_A05G18936.gene	0.493346	0.0325697570142		Ghi_D02G08416.gene	-3.3823	0.0723182709679
Ghi_D11G02121.gene	-2.5194	6.80478951949e-06		Ghi_D11G02121.gene	-1.33073	0.00483926809582		Ghi_A11G17131.gene	-3.37744	0.0589896
Ghi_D12G09221.gene	-11.9411	1.23741962152e-23		Ghi_D12G09221.gene	-2.38857	3.17708726502e-32		Ghi_D12G12626.gene	-3.37303	0.0550623938561
Ghi_A13G12011.gene	0	1		Ghi_A13G12011.gene	0	1		Ghi_D04G02686.gene	-3.37254	0.0538158767553
Ghi_A13G12016.gene	-2.6575	4.01745021577e-09		Ghi_A13G12016.gene	-0.0174604	0.951588		Ghi_A05G19116.gene	-3.36834	0.0553206502448
Ghi_D12G09226.gene	-6.62568	1.03408153397e-06		Ghi_D12G09226.gene	-1.90025	0.00740509597978		Ghi_D08G11226.gene	-3.36547	0.0590726498906
Ghi_A05G11871.gene	-1.21734	0.00261466407398		Ghi_A05G11871.gene	0.26485	0.386845		Ghi_A07G09351.gene	-3.3612	0.0573095316353
Ghi_A02G09786.gene	-0.90093	0.825256		Ghi_A02G09786.gene	0.0209820406172	0.995592		Ghi_A03G03526.gene	-3.35307	3.88775880867e-05
Ghi_A07G09171.gene	0.58782	0.000284298087807		Ghi_A07G09171.gene	0.225228	0.194181		Ghi_D05G11526.gene	-3.34768	0.0632868427367
Ghi_A07G09176.gene	-0.0376703	0.797991		Ghi_A07G09176.gene	-0.21463	0.148927		Ghi_A08G11896.gene	-3.32913	0.0039924558054
Ghi_A02G09781.gene	1.04787	7.21334329454e-08		Ghi_A02G09781.gene	0.819127	2.45087146076e-06		Ghi_D11G09551.gene	-3.31497	0.000322422539381
Ghi_A05G11876.gene	0	1		Ghi_A05G11876.gene	0.982753	0.809677		GhiUnG01206.gene	-3.30422	0.201772
Ghi_A11G12886.gene	0.350493	0.478091		Ghi_A11G12886.gene	0.387537	0.426125		Ghi_D04G08036.gene	-3.30213	2.35930664194e-09
Ghi_D01G10481.gene	0.293187	0.0527155424472		Ghi_D01G10481.gene	0.327607	0.0231513448413		Ghi_A11G04921.gene	-3.29237	1.4203991615e-20
Ghi_A07G08226.gene	-0.416915	0.330977		Ghi_A07G08226.gene	0.52619	0.148373		Ghi_D12G08481.gene	-3.27688	0.00497859828108
Ghi_A07G08221.gene	0	1		Ghi_A07G08221.gene	0	1		Ghi_A12G14171.gene	-3.26114	7.20568693714e-06
Ghi_A05G17791.gene	0.950967	2.05943709125e-06		Ghi_A05G17791.gene	-0.0750003	0.744684		Ghi_A13G14241.gene	-3.25028	0.00325928047067
Ghi_A11G12881.gene	3.11194	0.00462380428711		Ghi_A11G12881.gene	-0.969711	0.658385		Ghi_A05G17081.gene	-3.24455	0.0735822
Ghi_D03G06911.gene	-0.90093	0.825256		Ghi_D03G06911.gene	-0.9408	0.817655		Ghi_A01G02266.gene	-3.23567	0.0722184035367
Ghi_A07G05651.gene	0	1		Ghi_A07G05651.gene	0	1		Ghi_D09G07146.gene	-3.22593	0.205631
Ghi_A07G05656.gene	0	1		Ghi_A07G05656.gene	0	1		Ghi_D03G04751.gene	-3.22593	0.205631
Ghi_D03G06916.gene	-0.278783	0.0401899639753		Ghi_D03G06916.gene	-0.368783	0.00697457872146		Ghi_A05G10421.gene	-3.22593	0.205631
Ghi_A05G13586.gene	4.92765	5.00345378977e-05		Ghi_A05G13586.gene	4.45141	0.000393720757788		Ghi_A01G08081.gene	-3.22593	0.205631
Ghi_A03G08736.gene	0.455905	0.254061		Ghi_A03G08736.gene	0.0384114610192	0.929048		Ghi_D01G03191.gene	-3.22593	0.205631
Ghi_A03G08731.gene	-0.385717	0.00263661226671		Ghi_A03G08731.gene	-0.16112	0.185531		Ghi_D09G03666.gene	-3.22046	2.34214991481e-12
Ghi_A05G13581.gene	-0.0339356	0.809102		Ghi_A05G13581.gene	0.292267	0.0266274		Ghi_A13G05561.gene	-3.21708	0.202584
Ghi_D05G14241.gene	0	1		Ghi_D05G14241.gene	0	1		Ghi_D12G01321.gene	-3.21708	0.202584
Ghi_A02G02061.gene	-0.729075	2.04277749532e-05		Ghi_A02G02061.gene	-0.401317	0.0173123555547		Ghi_A06G11001.gene	-3.21708	0.202584
Ghi_A13G08096.gene	0	1		Ghi_A13G08096.gene	0	1		Ghi_A05G21506.gene	-3.21622	0.208064
Ghi_A13G08091.gene	-0.330637	0.0528460319225		Ghi_A13G08091.gene	0.0988697202144	0.562892		Ghi_A12G03186.gene	-3.21622	0.208064
Ghi_A02G02066.gene	-0.196105	0.594813		Ghi_A02G02066.gene	0.702346	0.0310090119744		Ghi_D08G13631.gene	-3.20835	0.204792
Ghi_D05G14246.gene	-1.43682	0.0128994740027		Ghi_D05G14246.gene	0.410001	0.342456		Ghi_A03G11346.gene	-3.20779	0.0981725620564
Ghi_D03G07066.gene	0.0608423	0.987792		Ghi_D03G07066.gene	0.0209818	0.995636		Ghi_A02G00881.gene	-3.2068	0.178026
Ghi_D03G07061.gene	0	1		Ghi_D03G07061.gene	0	1		Ghi_D05G15011.gene	-3.2068	0.178026
Ghi_D05G02441.gene	0.399526	0.0228857511062		Ghi_D05G02441.gene	0.10724	0.450845		Ghi_D01G10131.gene	-3.2068	0.178026
Ghi_A09G11166.gene	0.118987	0.691038		Ghi_A09G11166.gene	1.37486	7.57781149607e-06		Ghi_D07G08446.gene	-3.19963	0.212293
Ghi_A05G02116.gene	-0.16736	0.286314		Ghi_A05G02116.gene	-0.00832954	0.95381		Ghi_D07G10171.gene	-3.19963	0.212293
Ghi_A03G00241.gene	2.05731	1.15502130302e-09		Ghi_A03G00241.gene	1.66865	1.18579854967e-05		Ghi_A03G03261.gene	-3.19823	0.176275
Ghi_A12G00646.gene	-1.40734	0.61165		Ghi_A12G00646.gene	-1.44605	0.595909		Ghi_D04G04311.gene	-3.19823	0.176275
Ghi_A12G00641.gene	-2.36801	0.483726		Ghi_A12G00641.gene	0.432679	0.845928		Ghi_A13G10096.gene	-3.19823	0.176275
Ghi_A03G00246.gene	-1.22129	0.0685935058992		Ghi_A03G00246.gene	-0.33448	0.570051		Ghi_D08G05971.gene	-3.19337	0.00745967985998
Ghi_A05G02111.gene	0	1		Ghi_A05G02111.gene	0	1		Ghi_A07G11986.gene	-3.19081	0.252381
Ghi_A09G11161.gene	-0.223251	0.691944		Ghi_A09G11161.gene	-0.0317252	0.950095		Ghi_A09G03256.gene	-3.19081	0.252381
Ghi_A07G02151.gene	0.621481	0.0165865766253		Ghi_A07G02151.gene	-0.29059	0.339184		Ghi_A08G11941.gene	-3.1897	0.182102
Ghi_D04G02896.gene	-0.253802	0.837211		Ghi_D04G02896.gene	0.286093	0.810816		Ghi_A12G03356.gene	-3.1897	0.182102
Ghi_D12G05331.gene	-4.72162	1.09514080757e-11		Ghi_D12G05331.gene	-1.95611	0.000298932746703		Ghi_A12G11571.gene	-3.1897	0.182102
Ghi_A12G14806.gene	0.0398524705577	0.786346		Ghi_A12G14806.gene	0.0233003450664	0.864378		Ghi_D07G10636.gene	-3.1897	0.182102
Ghi_A07G02156.gene	0.124352	0.394243		Ghi_A07G02156.gene	0.376188	0.00611675		Ghi_A05G11716.gene	-3.18872	0.0296368891032
Ghi_D09G06246.gene	-1.27267	2.18014159178e-10		Ghi_D09G06246.gene	-0.454085	0.0125127107083		Ghi_D13G13416.gene	-3.18869	0.178537
Ghi_A05G23551.gene	0	1		Ghi_A05G23551.gene	0	1		Ghi_A03G12026.gene	-3.1871	1.57608641107e-06
Ghi_A10G04121.gene	-1.98317	9.68693655969e-68		Ghi_A10G04121.gene	-0.353714	0.000179327276704		Ghi_D06G10291.gene	-3.18655	0.0315300646616
Ghi_D09G06241.gene	-2.28283	1.4747396647e-21		Ghi_D09G06241.gene	-0.92738	5.25711278156e-07		Ghi_D09G09061.gene	-3.18465	1.90193099807e-11
Ghi_A03G12616.gene	-2.47438	2.05977100589e-07		Ghi_A03G12616.gene	-1.21198	0.00174464551593		Ghi_D05G14036.gene	-3.18419	1.67937602552e-11
Ghi_A05G02606.gene	0.339299	0.0449813193576		Ghi_A05G02606.gene	0.213051	0.211294		Ghi_A12G06451.gene	-3.18009	0.180603
Ghi_D05G02446.gene	0	1		Ghi_D05G02446.gene	0	1		Ghi_A01G08881.gene	-3.18009	0.180603
Ghi_A03G12611.gene	-6.50014	1.94625359437e-06		Ghi_A03G12611.gene	0.340418	0.477526		Ghi_A09G03106.gene	-3.18009	0.180603
Ghi_D03G00236.gene	0	1		Ghi_D03G00236.gene	0	1		Ghi_A12G04946.gene	-3.18009	0.180603
Ghi_A07G12586.gene	1.21622	4.90273245843e-18		Ghi_A07G12586.gene	0.386412	0.0121469164112		Ghi_D04G01736.gene	-3.18009	0.180603
Ghi_A11G14181.gene	2.02474	2.30706925519e-39		Ghi_A11G14181.gene	0.87358	6.51252431721e-08		Ghi_A05G04661.gene	-3.18009	0.180603
Ghi_D05G10901.gene	1.94189	0.613974		Ghi_D05G10901.gene	0	1		Ghi_A05G16416.gene	-3.1788	0.212334
Ghi_A11G11281.gene	0.39666	0.0571222685791		Ghi_A11G11281.gene	0.1081	0.634611		Ghi_A10G12596.gene	-3.1788	0.212334
Ghi_A13G08321.gene	0	1		Ghi_A13G08321.gene	0	1		Ghi_A06G12436.gene	-3.1788	0.212334
Ghi_D07G11096.gene	-2.32544	1.93374587245e-86		Ghi_D07G11096.gene	-0.390881	1.72230808618e-05		Ghi_D02G01561.gene	-3.17224	2.02522846781e-08
Ghi_D07G11091.gene	0	1		Ghi_D07G11091.gene	0	1		Ghi_A05G22176.gene	-3.17088	0.214409
Ghi_A13G08326.gene	0	1		Ghi_A13G08326.gene	0	1		Ghi_D04G03121.gene	-3.17036	0.186754
Ghi_A11G11286.gene	0	1		Ghi_A11G11286.gene	0	1		Ghi_A12G01931.gene	-3.17036	0.186754
Ghi_D07G08761.gene	0.395672	0.000970835667461		Ghi_D07G08761.gene	0.101152	0.454846		Ghi_A05G04736.gene	-3.17036	0.186754
Ghi_D10G00801.gene	0.176274	0.386245		Ghi_D10G00801.gene	-0.0942331	0.648402		Ghi_A13G01876.gene	-3.16225	2.07761347861e-15
Ghi_D01G11536.gene	0.264986	0.0469628477273		Ghi_D01G11536.gene	0.0304682476477	0.830687		Ghi_D07G12841.gene	-3.16084	0.217022
Ghi_A13G07581.gene	0	1		Ghi_A13G07581.gene	0	1		Ghi_A11G16436.gene	-3.16084	0.217022
Ghi_D01G11531.gene	0.650737	0.781332		Ghi_D01G11531.gene	-0.868533	0.792118		Ghi_D03G09846.gene	-3.16084	0.217022
Ghi_D10G00806.gene	1.12471	0.3207		Ghi_D10G00806.gene	0.163504	0.906661		Ghi_A08G05446.gene	-3.16084	0.217022
Ghi_D07G08766.gene	-0.223759	0.788828		Ghi_D07G08766.gene	0.646077	0.355275		Ghi_A03G01191.gene	-3.15967	0.222594
Ghi_A07G09796.gene	0.430968	0.0165570941811		Ghi_A07G09796.gene	-0.0181764	0.926799		Ghi_A09G11056.gene	-3.15967	0.222594
Ghi_A05G10581.gene	-2.592	5.80471971615e-48		Ghi_A05G10581.gene	-0.024751	0.813172		Ghi_A11G08786.gene	-3.15967	0.222594
GhiUnG01261.gene	0	1		GhiUnG01261.gene	0	1		Ghi_A03G01641.gene	-3.15571	0.00167639780685
GhiUnG01266.gene	0	1		GhiUnG01266.gene	0	1		Ghi_D01G02741.gene	-3.15476	2.22247064006e-16
Ghi_A05G10586.gene	-1.48159	1.04988680121e-28		Ghi_A05G10586.gene	0.310112	0.00761352765421		Ghi_A13G01926.gene	-3.15056	0.224995
Ghi_A13G10336.gene	-0.526129	1.18247566048e-05		Ghi_A13G10336.gene	0.0246918803661	0.825896		Ghi_A11G12256.gene	-3.15056	0.224995
Ghi_A07G09791.gene	0.797858	0.323299		Ghi_A07G09791.gene	0.193627	0.83108		Ghi_A09G00371.gene	-3.14019	1.70060587325e-08
Ghi_D01G04331.gene	-0.421282	0.00491139486285		Ghi_D01G04331.gene	0.0549685346693	0.659097		GhiUnG02751.gene	-3.13891	0.266582
Ghi_A01G01811.gene	2.05075	7.45536743794e-43		Ghi_A01G01811.gene	0.392567	0.0201452914886		Ghi_D13G09991.gene	-3.13891	0.266582
Ghi_A01G01816.gene	0	1		Ghi_A01G01816.gene	0	1		Ghi_D12G03071.gene	-3.13171	1.53491458074e-21
Ghi_D01G04336.gene	1.02262	0.802113		Ghi_D01G04336.gene	0	1		Ghi_A06G10776.gene	-3.12699	5.99751538739e-09
Ghi_A02G07901.gene	1.71062	1.20723259168e-22		Ghi_A02G07901.gene	0.200257	0.287747		Ghi_A12G10881.gene	-3.12398	1.17491413859e-06
Ghi_A03G05741.gene	0	1		Ghi_A03G05741.gene	0	1		Ghi_D09G02181.gene	-3.12179	7.82631868804e-12
Ghi_D02G01591.gene	-2.12264	0.246924		Ghi_D02G01591.gene	-0.812378	0.577154		Ghi_A11G12646.gene	-3.10757	0.0330097
Ghi_D06G09816.gene	0.950923	0.0612497537679		Ghi_D06G09816.gene	0.183222	0.721301		Ghi_A05G14791.gene	-3.10735	0.0347826847289
Ghi_D06G09811.gene	-1.18034	0.00639731951715		Ghi_D06G09811.gene	-0.0800201	0.822638		Ghi_A10G10891.gene	-3.09798	1.03928260843e-05
Ghi_A07G08101.gene	0	1		Ghi_A07G08101.gene	0	1		Ghi_A09G00351.gene	-3.09438	0.100144
Ghi_D02G01596.gene	-0.951859	0.00474972318625		Ghi_D02G01596.gene	0.451643	0.0753910399317		Ghi_D13G08896.gene	-3.08956	0.0954156166029
Ghi_A03G05746.gene	0	1		Ghi_A03G05746.gene	0	1		Ghi_D12G05596.gene	-3.08954	0.0949998370639
Ghi_D06G03856.gene	0	1		Ghi_D06G03856.gene	0	1		Ghi_A09G11146.gene	-3.08702	0.0356578885052
Ghi_D01G05061.gene	0	1		Ghi_D01G05061.gene	0	1		Ghi_D05G12086.gene	-3.0866	0.121077
Ghi_A10G12661.gene	-5.6174	3.14009543671e-05		Ghi_A10G12661.gene	-0.856245	0.152116		Ghi_A13G01051.gene	-3.08491	0.0938479190841
Ghi_D01G05066.gene	-2.89225	4.52743004817e-10		Ghi_D01G05066.gene	-0.60324	0.0526442918417		Ghi_A13G11481.gene	-3.08107	1.11413444314e-28
Ghi_D06G03851.gene	-0.261388	0.0268815795312		Ghi_D06G03851.gene	-0.214421	0.0542279148407		Ghi_A11G16766.gene	-3.08099	0.102572
Ghi_A10G12666.gene	0	1		Ghi_A10G12666.gene	0	1		Ghi_D08G00936.gene	-3.077	0.154416
Ghi_A03G08191.gene	-0.0324914	0.828899		Ghi_A03G08191.gene	0.0459701468753	0.751573		Ghi_A13G13641.gene	-3.07465	0.0999159088377
Ghi_D05G14866.gene	-1.5393	2.19099808665e-14		Ghi_D05G14866.gene	-0.518219	0.0010729454078		Ghi_D01G11661.gene	-3.07108	0.103762
Ghi_D05G14861.gene	-0.554101	0.00765178047511		Ghi_D05G14861.gene	-0.640572	0.00309441699242		Ghi_A08G07676.gene	-3.06542	0.0964213458878
Ghi_A03G08196.gene	0.304585	0.0175007806181		Ghi_A03G08196.gene	0.0377684385174	0.763533		Ghi_A09G09676.gene	-3.06519	3.87035172258e-12
Ghi_D02G04821.gene	0	1		Ghi_D02G04821.gene	0	1		Ghi_A07G10781.gene	-3.05933	2.52990955141e-07
Ghi_A06G11021.gene	0.00177761573076	0.994727		Ghi_A06G11021.gene	-0.43258	0.116057		Ghi_D04G02681.gene	-3.04032	1.96397663882e-05
Ghi_A05G18206.gene	0.294905	0.0286927213663		Ghi_A05G18206.gene	0.0265540599198	0.848664		Ghi_D04G01396.gene	-3.02838	0.0420933083796
Ghi_A01G06451.gene	0	1		Ghi_A01G06451.gene	0	1		Ghi_A06G10656.gene	-3.02423	8.04647199288e-06
Ghi_A01G06456.gene	-1.16645	9.16041599025e-09		Ghi_A01G06456.gene	-0.399773	0.0393593824831		Ghi_D10G01321.gene	-3.01206	0.00349881534605
Ghi_A05G18201.gene	0	1		Ghi_A05G18201.gene	0	1		Ghi_A01G12806.gene	-3.01175	0.00902830620061
Ghi_A06G11026.gene	0.38539	1.73835123363e-05		Ghi_A06G11026.gene	-0.183938	0.0954867702919		Ghi_D07G11831.gene	-2.99835	0.0137050745172
Ghi_A08G00151.gene	-0.858329	0.00020159316459		Ghi_A08G00151.gene	-0.341155	0.0983018022872		Ghi_A11G16741.gene	-2.9953	0.00287388234876
Ghi_A12G07516.gene	1.91226	3.74009025616e-06		Ghi_A12G07516.gene	0.855401	0.100118		Ghi_D07G01321.gene	-2.99478	2.31051596782e-16
Ghi_A07G13326.gene	0.415981	0.13153		Ghi_A07G13326.gene	0.573625	0.0210142268182		Ghi_A03G06681.gene	-2.98845	0.00876810379552
Ghi_A12G07511.gene	0.302362	0.114339		Ghi_A12G07511.gene	-0.134616	0.533331		Ghi_D01G04516.gene	-2.96952	8.8500395172e-07
Ghi_A05G10051.gene	0.0608423738001	0.987832		Ghi_A05G10051.gene	0.0209818436177	0.99563		Ghi_A08G06246.gene	-2.96944	9.16500482671e-14
Ghi_A03G03746.gene	0	1		Ghi_A03G03746.gene	0	1		Ghi_D02G00271.gene	-2.95568	1.71764873001e-19
Ghi_A03G03741.gene	0	1		Ghi_A03G03741.gene	0	1		Ghi_D05G12511.gene	-2.95193	0.0557802024341
Ghi_A05G10056.gene	0	1		Ghi_A05G10056.gene	0	1		Ghi_A06G02286.gene	-2.94924	4.02808132162e-06
Ghi_D12G03711.gene	0	1		Ghi_D12G03711.gene	0	1		Ghi_D04G08091.gene	-2.94868	1.31562779853e-06
GhiUnG01196.gene	-2.2342	0.437576		GhiUnG01196.gene	-0.717341	0.733979		Ghi_D12G00826.gene	-2.9218	0.127164
Ghi_D05G12161.gene	0	1		Ghi_D05G12161.gene	0	1		Ghi_D06G10691.gene	-2.91957	0.0652416
Ghi_D05G12166.gene	0.802232	1.05498644013e-05		Ghi_D05G12166.gene	-0.0781621	0.680467		Ghi_A07G13346.gene	-2.91953	1.77397823221e-05
Ghi_A02G03336.gene	1.03293	3.93146122031e-07		Ghi_A02G03336.gene	0.540284	0.00671077359395		Ghi_D05G06066.gene	-2.91382	0.328199
Ghi_A10G06716.gene	0	1		Ghi_A10G06716.gene	0	1		Ghi_D03G03116.gene	-2.91382	0.328199
Ghi_A08G07411.gene	-3.17269	9.54907185479e-22		Ghi_A08G07411.gene	-0.752125	0.0013993949224		Ghi_A05G10171.gene	-2.91382	0.328199
Ghi_A02G01786.gene	-0.226787	0.213991		Ghi_A02G01786.gene	0.242079	0.190647		Ghi_D12G00441.gene	-2.91382	0.328199
Ghi_A13G05616.gene	-6.4797	3.07954574737e-93		Ghi_A13G05616.gene	-1.64092	3.56024891323e-22		Ghi_D10G00796.gene	-2.91382	0.328199
Ghi_A02G01781.gene	0	1		Ghi_A02G01781.gene	0	1		Ghi_D11G17631.gene	-2.90993	0.0506671368237
Ghi_A08G07416.gene	0.434111	0.83453		Ghi_A08G07416.gene	0.741954	0.701376		Ghi_A01G12531.gene	-2.90601	3.18809304003e-20
Ghi_A07G10131.gene	0.652829	0.0332595355881		Ghi_A07G10131.gene	-0.0653132	0.846643		Ghi_A06G07501.gene	-2.90567	0.12707
Ghi_A05G05466.gene	0.517143	2.36026617553e-05		Ghi_A05G05466.gene	0.133925	0.201568		Ghi_A12G01321.gene	-2.90558	1.74948574743e-08
Ghi_D11G15106.gene	0	1		Ghi_D11G15106.gene	0	1		Ghi_D01G08296.gene	-2.90505	0.124997
Ghi_A05G05461.gene	-1.77939	0.652976		Ghi_A05G05461.gene	-1.81779	0.633521		Ghi_D11G05496.gene	-2.90163	0.291457
Ghi_D07G09381.gene	0.515583	0.000455279428256		Ghi_D07G09381.gene	0.166428	0.274466		Ghi_A08G06351.gene	-2.90163	0.291457
Ghi_A08G04141.gene	0.19523	0.499564		Ghi_A08G04141.gene	0.24168	0.347556		Ghi_D11G14546.gene	-2.90163	0.291457
Ghi_A09G12326.gene	1.7107	6.6858109262e-06		Ghi_A09G12326.gene	0.766511	0.0677053427239		Ghi_D13G13541.gene	-2.90163	0.291457
Ghi_A08G04146.gene	0	1		Ghi_A08G04146.gene	0	1		Ghi_A13G02366.gene	-2.89924	0.131217
Ghi_D07G09386.gene	-0.625751	0.000112707174109		Ghi_D07G09386.gene	-0.327957	0.0366928		Ghi_D04G02896.gene	-2.89924	0.131321
Ghi_D12G11101.gene	0.193249	0.303463		Ghi_D12G11101.gene	0.0841638454941	0.639881		Ghi_A01G04016.gene	-2.8907	0.290995
Ghi_A09G12321.gene	0	1		Ghi_A09G12321.gene	0	1		Ghi_A05G20421.gene	-2.8907	0.290995
Ghi_A08G13141.gene	-0.766009	4.4689721457e-15		Ghi_A08G13141.gene	-0.3073	0.0151235421867		Ghi_A11G17446.gene	-2.8907	0.290995
Ghi_D12G11106.gene	0.698325	0.00522211297347		Ghi_D12G11106.gene	0.0623481137709	0.821777		Ghi_A09G10146.gene	-2.88979	2.88069356947e-14
Ghi_A03G13566.gene	-1.96971	8.31297323213e-08		Ghi_A03G13566.gene	-0.673507	0.0221339795252		Ghi_A11G12336.gene	-2.88952	0.295008
Ghi_A01G05221.gene	1.89249	2.69237513009e-06		Ghi_A01G05221.gene	1.21404	7.81766049227e-05		Ghi_D08G02626.gene	-2.88952	0.295008
Ghi_A06G08281.gene	0	1		Ghi_A06G08281.gene	0	1		Ghi_A06G03506.gene	-2.88952	0.295008
Ghi_A06G08286.gene	0	1		Ghi_A06G08286.gene	0	1		Ghi_D05G06881.gene	-2.88952	0.295008
Ghi_A07G10136.gene	-0.90093	0.825256		Ghi_A07G10136.gene	-0.9408	0.817655		Ghi_D03G04131.gene	-2.88952	0.295008
Ghi_A01G05226.gene	0	1		Ghi_A01G05226.gene	0	1		Ghi_D04G01056.gene	-2.88952	0.295008
Ghi_A03G13561.gene	-0.85245	0.0288287650637		Ghi_A03G13561.gene	-0.531701	0.150259		Ghi_D11G07386.gene	-2.87984	0.297894
Ghi_A05G22476.gene	-0.498099	0.000190466545415		Ghi_A05G22476.gene	-0.23928	0.0394156383878		Ghi_D01G05501.gene	-2.87984	0.297894
Ghi_A07G11416.gene	0	1		Ghi_A07G11416.gene	0	1		Ghi_D02G11741.gene	-2.87984	0.297894
Ghi_D02G08236.gene	-0.139341	0.77484		Ghi_D02G08236.gene	-0.0980658	0.835596		Ghi_D08G08276.gene	-2.87984	0.297894
Ghi_A07G11411.gene	-1.68638	6.30939813839e-24		Ghi_A07G11411.gene	-0.914194	1.97697106324e-07		Ghi_D01G11416.gene	-2.87984	0.297894
Ghi_A05G22471.gene	-0.0149792	0.952005		Ghi_A05G22471.gene	-0.253761	0.317821		Ghi_A13G01856.gene	-2.87984	0.297894
Ghi_A08G03241.gene	0.248943	0.795557		Ghi_A08G03241.gene	1.64185	0.0249108		Ghi_A12G08976.gene	-2.87816	0.26264
Ghi_D10G13076.gene	-0.273568	0.584853		Ghi_D10G13076.gene	-0.108413	0.824094		Ghi_A11G04761.gene	-2.87816	0.26264
Ghi_D10G13071.gene	-3.24309	2.90510064305e-228		Ghi_D10G13071.gene	-0.548424	2.48880053045e-11		Ghi_A01G05541.gene	-2.87816	0.26264
Ghi_A08G03246.gene	-0.586226	5.2327314509e-09		Ghi_A08G03246.gene	-0.269054	0.00594362044229		Ghi_A12G09516.gene	-2.87816	0.26264
Ghi_A02G01871.gene	0	1		Ghi_A02G01871.gene	0	1		Ghi_D04G02676.gene	-2.87816	0.26264
Ghi_A02G01876.gene	0	1		Ghi_A02G01876.gene	0	1		Ghi_A07G05466.gene	-2.87816	0.26264
Ghi_D07G04096.gene	-3.7543	1.3341796626e-22		Ghi_D07G04096.gene	-0.995087	2.84046258686e-05		Ghi_A12G00556.gene	-2.87816	0.26264
Ghi_D04G10116.gene	0	1		Ghi_D04G10116.gene	0.982753	0.809677		Ghi_D10G09371.gene	-2.87816	0.26264
Ghi_D04G10111.gene	0.0608423	0.987792		Ghi_D04G10111.gene	1.91528	0.443947		Ghi_D11G14136.gene	-2.87816	0.26264
Ghi_D07G04091.gene	0	1		Ghi_D07G04091.gene	0	1		Ghi_D06G08626.gene	-2.87772	2.70015645139e-14
Ghi_A05G18886.gene	-0.743101	0.000253978093477		Ghi_A05G18886.gene	0.0124028055857	0.944672		Ghi_D07G00871.gene	-2.86973	0.0216899480626
Ghi_A06G11686.gene	-5.45509	7.45422045078e-08		Ghi_A06G11686.gene	-0.595628	0.199239		Ghi_A12G14681.gene	-2.86887	0.341667
Ghi_A02G01966.gene	-1.60061	1.38408334392e-07		Ghi_A02G01966.gene	-0.109986	0.644564		Ghi_A03G00581.gene	-2.86887	0.341667
Ghi_A06G11681.gene	-0.980836	0.000120077958036		Ghi_A06G11681.gene	-0.168186	0.454299		Ghi_D11G06711.gene	-2.86887	0.341667
Ghi_A06G08131.gene	1.02262	0.802113		Ghi_A06G08131.gene	1.89293	0.639103		Ghi_D02G04921.gene	-2.86872	0.00762994245945
Ghi_A06G08136.gene	0.332042	0.362758		Ghi_A06G08136.gene	0.339888	0.350918		Ghi_A08G06236.gene	-2.8676	6.2952764823e-05
Ghi_D01G02591.gene	-4.69183	9.14541712094e-05		Ghi_D01G02591.gene	0.937179	0.0351990507011		Ghi_A06G03631.gene	-2.86751	0.265718
Ghi_D01G02596.gene	-2.09599	3.2510869128e-57		Ghi_D01G02596.gene	-0.178349	0.105962		Ghi_A01G02541.gene	-2.86751	0.265718
Ghi_A01G01106.gene	-0.580953	0.821081		Ghi_A01G01106.gene	-1.4815	0.585126		Ghi_A02G08271.gene	-2.86751	0.265718
Ghi_A01G01101.gene	1.11385	0.000161829988211		Ghi_A01G01101.gene	-0.236926	0.51181		Ghi_A09G11761.gene	-2.86751	0.265718
Ghi_A11G10621.gene	0	1		Ghi_A11G10621.gene	0	1		Ghi_D02G11736.gene	-2.86751	0.265718
Ghi_A03G00566.gene	0.154261	0.354064		Ghi_A03G00566.gene	-0.0650122	0.70136		Ghi_D11G01286.gene	-2.86751	0.265718
Ghi_A06G10371.gene	0.0751075420795	0.641804		Ghi_A06G10371.gene	-0.0545875	0.738824		Ghi_A09G02431.gene	-2.86751	0.265718
Ghi_A06G10376.gene	0	1		Ghi_A06G10376.gene	0	1		Ghi_A09G07396.gene	-2.86751	0.265718
Ghi_A11G10626.gene	0	1		Ghi_A11G10626.gene	0	1		Ghi_D03G02156.gene	-2.86751	0.265718
Ghi_D05G02831.gene	-0.661295	0.00765963666652		Ghi_D05G02831.gene	-0.0175085	0.932938		Ghi_D10G01566.gene	-2.86628	0.298236
Ghi_D09G03721.gene	0	1		Ghi_D09G03721.gene	0	1		Ghi_D11G06831.gene	-2.86628	0.298236
Ghi_A04G05996.gene	0	1		Ghi_A04G05996.gene	0	1		Ghi_D12G08646.gene	-2.86628	0.298236
Ghi_A08G02241.gene	0.0977803363948	0.295752		Ghi_A08G02241.gene	0.0768341460245	0.409354		Ghi_D12G11686.gene	-2.86628	0.298236
Ghi_D07G11486.gene	0.320867	0.00640414540503		Ghi_D07G11486.gene	0.0178252797095	0.877376		Ghi_A13G11416.gene	-2.86628	0.298236
Ghi_D05G02836.gene	0.922726	0.000163423819515		Ghi_D05G02836.gene	0.998655	8.22499538853e-05		Ghi_D13G02756.gene	-2.86628	0.298236
Ghi_A03G02836.gene	0	1		Ghi_A03G02836.gene	0	1		Ghi_A07G10941.gene	-2.86628	0.298236
Ghi_D07G01576.gene	0.689536	1.30992096332e-06		Ghi_D07G01576.gene	0.467223	0.00100826476887		Ghi_D12G09931.gene	-2.86628	0.298236
Ghi_D07G01571.gene	-0.239003	0.106006		Ghi_D07G01571.gene	-0.0729259	0.625852		Ghi_A05G12956.gene	-2.86463	2.06999960691e-14
Ghi_A03G02831.gene	0.348151	0.0383823163756		Ghi_A03G02831.gene	0.0451089367814	0.791832		Ghi_A05G15176.gene	-2.86324	1.5705714371e-19
Ghi_D02G11271.gene	1.29346	8.76273642847e-17		Ghi_D02G11271.gene	0.706737	4.85553705496e-06		Ghi_A02G02141.gene	-2.85644	0.304794
Ghi_A11G17936.gene	-1.31424	0.0353976179055		Ghi_A11G17936.gene	-0.299845	0.551366		Ghi_A07G09131.gene	-2.85644	0.304794
Ghi_A11G17931.gene	0.172765	0.553514		Ghi_A11G17931.gene	-0.133352	0.665012		Ghi_D11G13426.gene	-2.85644	0.304794
Ghi_D02G11276.gene	1.54832	2.37809417547e-05		Ghi_D02G11276.gene	0.54631	0.212203		Ghi_D07G07666.gene	-2.85644	0.304794
Ghi_D08G05241.gene	0	1		Ghi_D08G05241.gene	0	1		Ghi_D10G01036.gene	-2.85644	0.304794
Ghi_D07G02006.gene	0.309056	0.12639		Ghi_D07G02006.gene	0.0804886836889	0.68172		Ghi_A01G07651.gene	-2.85551	0.269184
Ghi_A04G05901.gene	-0.662676	0.235077		Ghi_A04G05901.gene	-0.656438	0.270939		Ghi_A02G00361.gene	-2.85551	0.269184
Ghi_A01G05486.gene	-1.27568	1.2031351772e-25		Ghi_A01G05486.gene	-0.196754	0.0555384537284		Ghi_D11G04086.gene	-2.85551	0.269184
Ghi_A06G11971.gene	0.535681	0.101737		Ghi_A06G11971.gene	0.0305728395336	0.9302		Ghi_D11G02746.gene	-2.85551	0.269184
Ghi_A06G11976.gene	0.46966	0.000118110162189		Ghi_A06G11976.gene	0.0273646173681	0.826782		Ghi_A12G13501.gene	-2.84889	1.08389754834e-05
Ghi_A01G05481.gene	1.03076	2.62842382184e-13		Ghi_A01G05481.gene	0.301795	0.0602402100422		Ghi_D02G08276.gene	-2.84402	0.304913
Ghi_A04G05906.gene	-0.0852066	0.411952		Ghi_A04G05906.gene	-0.169466	0.107108		Ghi_A07G04806.gene	-2.84402	0.304913
Ghi_D07G02001.gene	0.472728	1.59424698716e-05		Ghi_D07G02001.gene	0.100074	0.395246		Ghi_D02G02681.gene	-2.84402	0.304913
Ghi_D01G02041.gene	0	1		Ghi_D01G02041.gene	0	1		Ghi_D06G06511.gene	-2.84402	0.304913
Ghi_A03G00561.gene	2.53561	0.440939		Ghi_A03G00561.gene	2.46022	0.44384		Ghi_A11G09456.gene	-2.84402	0.304913
Ghi_D01G02046.gene	0.309963	0.266074		Ghi_D01G02046.gene	0.0369026728824	0.900466		Ghi_A13G03206.gene	-2.84402	0.304913
Ghi_A01G08226.gene	0	1		Ghi_A01G08226.gene	0	1		Ghi_A03G10686.gene	-2.84266	0.3089
Ghi_D05G12836.gene	-1.94782	2.22775256552e-41		Ghi_D05G12836.gene	-0.520973	0.00017137794785		Ghi_A09G14011.gene	-2.84266	0.3089
Ghi_D11G00891.gene	-0.90093	0.825256		Ghi_D11G00891.gene	0.0209818890722	0.995622		Ghi_A03G09921.gene	-2.84266	0.3089
Ghi_D11G00896.gene	-0.162895	0.710309		Ghi_D11G00896.gene	-0.000435398	0.999167		Ghi_D04G02436.gene	-2.84266	0.3089
Ghi_D05G12831.gene	0	1		Ghi_D05G12831.gene	0	1		Ghi_D13G13591.gene	-2.84266	0.3089
Ghi_A01G08221.gene	-0.485232	0.00150149349974		Ghi_A01G08221.gene	0.0572421354583	0.700031		Ghi_D08G00806.gene	-2.84266	0.3089
Ghi_A06G10081.gene	-0.434864	7.66892534096e-08		Ghi_A06G10081.gene	-0.0423046	0.593709		Ghi_D10G03316.gene	-2.84266	0.3089
Ghi_A08G03866.gene	0	1		Ghi_A08G03866.gene	0	1		Ghi_A01G12756.gene	-2.84266	0.3089
Ghi_A08G03861.gene	-0.0799415	0.585155		Ghi_A08G03861.gene	-0.0612776	0.673192		Ghi_A10G06121.gene	-2.84266	0.3089
Ghi_A06G10086.gene	0	1		Ghi_A06G10086.gene	0	1		Ghi_A06G10866.gene	-2.83733	0.0102523661751
Ghi_D09G04486.gene	0	1		Ghi_D09G04486.gene	0.982753	0.809677		Ghi_A07G10481.gene	-2.83136	0.312317
Ghi_A01G00051.gene	0	1		Ghi_A01G00051.gene	0	1		Ghi_D09G09241.gene	-2.83136	0.312317
Ghi_A01G04571.gene	1.07648	0.566557		Ghi_A01G04571.gene	1.23241	0.492862		Ghi_D03G00271.gene	-2.83136	0.312317
Ghi_A12G06396.gene	0	1		Ghi_A12G06396.gene	0	1		Ghi_D13G12246.gene	-2.83136	0.312317
Ghi_A12G06391.gene	0	1		Ghi_A12G06391.gene	0	1		Ghi_D08G01301.gene	-2.83136	0.312317
Ghi_A01G04576.gene	0	1		Ghi_A01G04576.gene	0	1		Ghi_D10G05846.gene	-2.8296	0.0629819309299
Ghi_A01G00056.gene	-1.71611	8.72202870703e-08		Ghi_A01G00056.gene	0.81959	0.000235411565041		Ghi_D06G00151.gene	-2.82935	8.30766275072e-06
Ghi_D09G04481.gene	0	1		Ghi_D09G04481.gene	0	1		Ghi_D13G13686.gene	-2.82693	1.76542169776e-55
Ghi_D11G07321.gene	0.0608423738001	0.987832		Ghi_D11G07321.gene	-0.9408	0.817655		Ghi_D04G00281.gene	-2.8172	0.357321
Ghi_A10G05786.gene	-0.325824	0.248259		Ghi_A10G05786.gene	-0.0244121	0.927173		Ghi_A05G16196.gene	-2.8172	0.357321
Ghi_D11G07326.gene	-0.90093	0.825256		Ghi_D11G07326.gene	1.92275	0.446274		Ghi_D11G16751.gene	-2.8172	0.357321
Ghi_A06G05551.gene	-0.444378	0.0032867016537		Ghi_A06G05551.gene	-0.16921	0.222527		Ghi_D04G01426.gene	-2.8172	0.357321
Ghi_A06G00706.gene	0	1		Ghi_A06G00706.gene	0	1		Ghi_A01G09871.gene	-2.80848	0.0604960649261
Ghi_A05G13801.gene	-0.715995	6.89864117269e-07		Ghi_A05G13801.gene	-0.277933	0.0486396662818		Ghi_A01G00836.gene	-2.79933	0.000316846713635
Ghi_A07G13101.gene	0	1		Ghi_A07G13101.gene	0	1		Ghi_D06G12581.gene	-2.79808	1.45432088206e-22
Ghi_A05G13806.gene	-0.293836	0.333092		Ghi_A05G13806.gene	-0.0931392	0.760508		Ghi_D10G00291.gene	-2.79648	0.00674749200912
Ghi_A06G00701.gene	0	1		Ghi_A06G00701.gene	1.89293	0.639103		Ghi_D02G00291.gene	-2.79471	0.00203573772049
Ghi_A06G05556.gene	-0.807876	0.813666		Ghi_A06G05556.gene	-0.845655	0.798401		Ghi_A05G19106.gene	-2.78701	0.0388055139174
Ghi_D13G01931.gene	-2.27454	2.9231022957e-10		Ghi_D13G01931.gene	-0.242117	0.362411		Ghi_D06G06571.gene	-2.78486	8.52595491285e-10
Ghi_D13G01936.gene	-0.360718	0.358711		Ghi_D13G01936.gene	0.652014	0.0434280584889		Ghi_D03G05396.gene	-2.77116	0.0116986605746
Ghi_A06G01076.gene	2.18473	1.11060425604e-52		Ghi_A06G01076.gene	0.0984845003136	0.558125		Ghi_D01G07501.gene	-2.75927	0.110203
Ghi_A06G01071.gene	1.55811	0.569736		Ghi_A06G01071.gene	1.51165	0.577239		Ghi_D09G05966.gene	-2.7399	2.94538272946e-09
Ghi_D01G03516.gene	1.82347	0.000400899512399		Ghi_D01G03516.gene	0.81598	0.207766		Ghi_A11G18461.gene	-2.73729	0.174371
Ghi_A10G09391.gene	1.30648	6.43273684037e-33		Ghi_A10G09391.gene	0.297771	0.00373855207606		Ghi_A05G13736.gene	-2.73647	3.44322092968e-12
Ghi_A10G09396.gene	-1.75923	2.1971376177e-13		Ghi_A10G09396.gene	-0.932363	1.34755207116e-05		Ghi_D06G06146.gene	-2.73394	1.1875360603e-07
Ghi_A03G07711.gene	0.284487	0.0872950043069		Ghi_A03G07711.gene	0.0235891958354	0.891593		Ghi_D10G13696.gene	-2.73328	0.117686
Ghi_A09G15211.gene	0	1		Ghi_A09G15211.gene	0	1		Ghi_D10G10456.gene	-2.73254	0.190637
Ghi_A01G04681.gene	-0.107948	0.66466		Ghi_A01G04681.gene	0.0485572713542	0.850489		Ghi_A05G20191.gene	-2.73119	0.169193
Ghi_A06G09661.gene	0	1		Ghi_A06G09661.gene	0	1		Ghi_D04G00881.gene	-2.73116	0.168479
Ghi_A06G09666.gene	0	1		Ghi_A06G09666.gene	0	1		Ghi_A10G06561.gene	-2.73116	0.168479
Ghi_A01G04686.gene	0.0805683803823	0.407277		Ghi_A01G04686.gene	0.0464922	0.638475		Ghi_D02G07776.gene	-2.72654	0.194633
Ghi_D03G05036.gene	-0.243106	0.0611515905034		Ghi_D03G05036.gene	0.0605222571622	0.601006		Ghi_D08G06366.gene	-2.72523	0.0428872
Ghi_A06G07956.gene	-1.4075	3.69231386713e-09		Ghi_A06G07956.gene	0.52588	0.00410779213256		Ghi_D09G07006.gene	-2.72224	5.64663660997e-17
Ghi_A13G09341.gene	1.92051	0.620023		Ghi_A13G09341.gene	0	1		Ghi_A08G04231.gene	-2.72053	0.204289
Ghi_A06G07951.gene	0	1		Ghi_A06G07951.gene	0	1		Ghi_A03G06561.gene	-2.71945	0.171193
Ghi_D03G05031.gene	0	1		Ghi_D03G05031.gene	1.88744	0.615622		Ghi_D13G07046.gene	-2.71945	0.171193
Ghi_A13G09346.gene	-4.54752	0.0857746144969		Ghi_A13G09346.gene	-1.15569	0.195407		Ghi_D11G09241.gene	-2.71945	0.171193
Ghi_A12G15736.gene	-1.75005	0.00157594352934		Ghi_A12G15736.gene	-0.434643	0.350326		Ghi_A03G13211.gene	-2.71945	0.171193
Ghi_A09G15216.gene	-0.625645	0.000770030734463		Ghi_A09G15216.gene	-0.321505	0.0406243302175		Ghi_D06G06516.gene	-2.71358	0.179682
Ghi_A01G11751.gene	-1.97882	2.09156402694e-57		Ghi_A01G11751.gene	-0.423277	6.22902313526e-06		Ghi_A12G14936.gene	-2.71357	0.17894
Ghi_D10G02511.gene	-0.124877	0.349237		Ghi_D10G02511.gene	-0.261288	0.0428276832757		Ghi_A13G14556.gene	-2.71284	0.167569
Ghi_D09G05281.gene	0.440695	0.73228		Ghi_D09G05281.gene	0.543772	0.656592		Ghi_A01G12936.gene	-2.71215	0.171656
Ghi_D09G05286.gene	0.0608423	0.987792		Ghi_D09G05286.gene	1.92275	0.445742		Ghi_A13G09761.gene	-2.71215	0.171656
Ghi_D10G02516.gene	-2.36801	0.483726		Ghi_D10G02516.gene	-0.564707	0.822511		Ghi_A01G08166.gene	-2.71214	0.171051
Ghi_A01G11756.gene	-0.0482726	0.876494		Ghi_A01G11756.gene	-0.151379	0.618261		Ghi_D11G06406.gene	-2.71044	7.84863938517e-07
Ghi_A06G06396.gene	-6.34561	4.70377258182e-06		Ghi_A06G06396.gene	-1.62582	0.0324845051629		Ghi_A01G05151.gene	-2.71037	1.34125396694e-26
Ghi_D10G08616.gene	0	1		Ghi_D10G08616.gene	0.982753	0.809677		Ghi_D13G12841.gene	-2.70888	0.0147407075219
Ghi_D10G08611.gene	0.101168	0.608749		Ghi_D10G08611.gene	0.0851737811991	0.669563		Ghi_A10G10681.gene	-2.70628	0.16902
Ghi_D11G09596.gene	0.579335	0.171696		Ghi_D11G09596.gene	-0.418553	0.403726		Ghi_D05G09106.gene	-2.70613	0.000269745233417
Ghi_A06G06391.gene	0	1		Ghi_A06G06391.gene	0	1		Ghi_A01G05311.gene	-2.70533	0.196898
Ghi_A10G09641.gene	-0.220879	0.0639625791483		Ghi_A10G09641.gene	0.00143976400896	0.990361		Ghi_D11G03001.gene	-2.70533	0.197053
Ghi_A11G03146.gene	-1.67731	0.25898		Ghi_A11G03146.gene	-0.228028	0.831503		Ghi_A09G14511.gene	-2.70059	0.200984
Ghi_D05G09921.gene	0.328596	0.0367073807838		Ghi_D05G09921.gene	-0.217255	0.173087		Ghi_D05G14846.gene	-2.69957	0.176233
Ghi_D05G09926.gene	0	1		Ghi_D05G09926.gene	0	1		Ghi_A11G05346.gene	-2.69957	0.176233
Ghi_A11G03141.gene	-0.703418	2.05417633976e-14		Ghi_A11G03141.gene	-0.27923	0.0129602774232		Ghi_A08G03871.gene	-2.69369	7.34627736112e-13
Ghi_A10G09646.gene	-0.247184	0.0257398628878		Ghi_A10G09646.gene	-0.0330384	0.762894		Ghi_D13G11031.gene	-2.68667	0.185182
Ghi_A05G08961.gene	0.631341	0.787848		Ghi_A05G08961.gene	0.603449	0.785318		Ghi_D13G00081.gene	-2.68202	0.00334894431033
Ghi_A05G08966.gene	-0.515114	8.01357344423e-07		Ghi_A05G08966.gene	-0.397206	0.000268699615989		Ghi_A12G06486.gene	-2.67975	9.30500146637e-17
Ghi_A03G12371.gene	1.07253	5.52638956772e-19		Ghi_A03G12371.gene	0.199085	0.125179		Ghi_D09G07821.gene	-2.67972	0.206762
Ghi_A09G04536.gene	2.40811	0.00027379057883		Ghi_A09G04536.gene	1.01945	0.256519		Ghi_D12G15391.gene	-2.67688	1.23245891372e-83
Ghi_A09G09726.gene	-0.674333	0.0496485318633		Ghi_A09G09726.gene	-1.02829	0.00257571227187		Ghi_A11G12546.gene	-2.67572	5.15272475253e-09
Ghi_A09G09721.gene	-0.973648	0.0247111914937		Ghi_A09G09721.gene	-0.323968	0.428285		Ghi_A03G07751.gene	-2.67049	0.0352247339065
Ghi_A09G04531.gene	2.47463	0.0694343184009		Ghi_A09G04531.gene	-0.573595	0.818201		Ghi_D10G12081.gene	-2.66998	0.0132483
Ghi_D10G04916.gene	-0.90093	0.825256		Ghi_D10G04916.gene	-0.9408	0.817655		Ghi_D03G08631.gene	-2.66446	0.0483285286453
Ghi_D10G04911.gene	-0.0419603	0.821348		Ghi_D10G04911.gene	-0.114527	0.535265		Ghi_D13G10421.gene	-2.65854	0.00172028387835
Ghi_D09G05751.gene	0.784765	5.01366735844e-10		Ghi_D09G05751.gene	0.391151	0.00228756095309		Ghi_D01G04536.gene	-2.65528	1.15689229096e-18
Ghi_D05G04861.gene	-2.662	3.0635684886e-05		Ghi_D05G04861.gene	-0.787996	0.128173		Ghi_D10G10281.gene	-2.65226	1.06459402747e-05
Ghi_A01G03501.gene	-2.14239	0.377446		Ghi_A01G03501.gene	-1.2827	0.563338		Ghi_A02G06111.gene	-2.64815	5.77034318807e-05
Ghi_A01G07881.gene	0	1		Ghi_A01G07881.gene	0	1		Ghi_D13G13146.gene	-2.64666	0.00784316347983
Ghi_A01G07886.gene	0	1		Ghi_A01G07886.gene	0	1		Ghi_D09G11156.gene	-2.64477	9.81230496709e-30
Ghi_A01G03506.gene	0.286825	0.432916		Ghi_A01G03506.gene	0.249488	0.497039		Ghi_D11G15951.gene	-2.64359	1.32622289214e-12
Ghi_D05G04866.gene	-1.11331	1.82381465528e-11		Ghi_D05G04866.gene	-0.425761	0.00359728049693		Ghi_A01G11871.gene	-2.64341	3.35956280996e-27
Ghi_D09G05756.gene	1.36274	5.04396219075e-48		Ghi_D09G05756.gene	0.287282	0.00195047961307		Ghi_D06G02071.gene	-2.63615	6.08459190297e-05
Ghi_A03G01876.gene	-2.02671	4.81782569401e-05		Ghi_A03G01876.gene	0.458391	0.17589		GhiUnG03181.gene	-2.635	0.312937
Ghi_D01G05671.gene	0.0810504930704	0.70107		Ghi_D01G05671.gene	-0.0411953	0.852526		Ghi_D12G04376.gene	-2.63395	0.00204810250469
Ghi_A03G04946.gene	-0.00492717	0.973982		Ghi_A03G04946.gene	-0.247407	0.157346		Ghi_D12G14041.gene	-2.63247	0.0528822267232
Ghi_A03G01871.gene	0	1		Ghi_A03G01871.gene	0	1		Ghi_A05G00686.gene	-2.63244	1.60923081789e-10
Ghi_D05G00521.gene	-0.41018	0.15244		Ghi_D05G00521.gene	-0.0838355	0.747097		Ghi_D05G01596.gene	-2.63108	7.95142322851e-13
Ghi_D01G03711.gene	-2.25995	0.189345		Ghi_D01G03711.gene	-0.495209	0.687895		Ghi_A09G03936.gene	-2.62491	8.27788290898e-09
Ghi_D01G03716.gene	0	1		Ghi_D01G03716.gene	0	1		Ghi_A01G01841.gene	-2.61723	0.00363820046706
Ghi_D05G00526.gene	0.0177031307499	0.890223		Ghi_D05G00526.gene	-0.0143344	0.91378		Ghi_A11G10136.gene	-2.61299	0.114307
Ghi_D07G03066.gene	-0.186871	0.329725		Ghi_D07G03066.gene	-0.0460436	0.799177		Ghi_D06G02586.gene	-2.61037	2.02885030671e-14
Ghi_D01G11946.gene	-0.354781	0.0380281582179		Ghi_D01G11946.gene	0.413543	0.00298021769709		Ghi_A11G06161.gene	-2.60931	1.82743119761e-05
Ghi_D01G11941.gene	0.0678650545405	0.676744		Ghi_D01G11941.gene	0.0998017738405	0.509234		Ghi_A13G09066.gene	-2.60801	9.63152734526e-12
Ghi_D07G03061.gene	-1.28585	0.0165137350651		Ghi_D07G03061.gene	-0.698534	0.145778		Ghi_D10G06466.gene	-2.60495	0.000298946719549
Ghi_A03G04941.gene	-0.316924	0.0188725916904		Ghi_A03G04941.gene	0.00941181202616	0.944378		Ghi_A02G09986.gene	-2.6046	0.0993331327151
Ghi_D10G07306.gene	0.453298	0.0076632256873		Ghi_D10G07306.gene	0.122184	0.496985		Ghi_D12G02951.gene	-2.6018	0.000209655996917
Ghi_A11G16711.gene	1.23754	2.17513774699e-06		Ghi_A11G16711.gene	0.295336	0.329158		Ghi_A09G04536.gene	-2.60091	0.000116664811042
Ghi_A11G16716.gene	0	1		Ghi_A11G16716.gene	0	1		Ghi_A05G10636.gene	-2.59951	0.00106687881139
Ghi_D10G02771.gene	0.412952	0.0055272193246		Ghi_D10G02771.gene	-0.125021	0.425367		Ghi_D07G08441.gene	-2.59616	0.0428796865232
Ghi_D11G07811.gene	-0.0752395	0.78263		Ghi_D11G07811.gene	-0.500971	0.0639169113183		Ghi_D07G01611.gene	-2.59616	0.0428796865232
Ghi_A13G05511.gene	0	1		Ghi_A13G05511.gene	0	1		Ghi_A05G23256.gene	-2.59508	0.0179807166573
Ghi_D07G06656.gene	0	1		Ghi_D07G06656.gene	0	1		Ghi_D08G11936.gene	-2.59334	7.76481335495e-10
Ghi_D05G10156.gene	0.158273	0.34212		Ghi_D05G10156.gene	-0.0889049	0.597929		Ghi_A08G12646.gene	-2.59281	6.55838674761e-06
Ghi_D05G10151.gene	1.50448	9.6878386282e-17		Ghi_D05G10151.gene	0.51238	0.0167915420138		Ghi_D08G06041.gene	-2.59259	0.0948160010843
Ghi_D07G06651.gene	-4.97506	0.00292475427048		Ghi_D07G06651.gene	-2.58188	0.0615465446197		Ghi_D13G00961.gene	-2.59156	0.0442065106078
Ghi_D01G03511.gene	0	1		Ghi_D01G03511.gene	0	1		Ghi_A07G08326.gene	-2.58807	0.00495500552168
Ghi_A11G12416.gene	-1.30531	0.289061		Ghi_A11G12416.gene	0.644856	0.464657		Ghi_D10G11311.gene	-2.58751	2.34490067333e-15
Ghi_A11G12411.gene	-0.90093	0.825256		Ghi_A11G12411.gene	-0.9408	0.817655		Ghi_A03G00891.gene	-2.58726	0.00487393391301
Ghi_A09G12416.gene	-1.61878	8.56511530684e-37		Ghi_A09G12416.gene	-0.412561	0.000620520301658		Ghi_A07G07556.gene	-2.58283	0.115848
Ghi_D11G03316.gene	-0.998282	3.01505632753e-16		Ghi_D11G03316.gene	-0.407738	0.000298680818548		Ghi_A09G01001.gene	-2.58283	0.115848
Ghi_A03G10986.gene	0	1		Ghi_A03G10986.gene	0	1		Ghi_A12G01316.gene	-2.57444	2.59278661503e-05
Ghi_A12G02546.gene	1.19177	0.0641659947543		Ghi_A12G02546.gene	0.547635	0.478989		Ghi_D05G12001.gene	-2.57112	2.05455900236e-09
Ghi_A06G11216.gene	0.61956	1.99204130905e-05		Ghi_A06G11216.gene	0.263223	0.0693789439441		Ghi_D07G02971.gene	-2.56218	2.08529770672e-13
Ghi_A03G11686.gene	0.208572	0.362653		Ghi_A03G11686.gene	0.0657413249814	0.775928		Ghi_D07G02791.gene	-2.54868	0.0112383790324
Ghi_A03G10981.gene	-0.759299	1.75287594578e-06		Ghi_A03G10981.gene	-0.217834	0.159745		Ghi_A10G12506.gene	-2.53608	2.3692603551e-09
Ghi_D10G07301.gene	-0.740101	0.00453845303792		Ghi_D10G07301.gene	-0.594762	0.0224102932154		Ghi_A08G08861.gene	-2.53353	0.0547272894879
Ghi_A08G06056.gene	0	1		Ghi_A08G06056.gene	0	1		Ghi_D07G02146.gene	-2.52728	0.252618
Ghi_A09G12971.gene	0.0888474890107	0.456663		Ghi_A09G12971.gene	-0.21791	0.0738752811442		Ghi_A10G10166.gene	-2.5269	8.17258117723e-24
Ghi_A04G06596.gene	0.0645146	0.692364		Ghi_A04G06596.gene	-0.00830055	0.960338		Ghi_D08G02726.gene	-2.52002	0.247553
Ghi_D08G04651.gene	0	1		Ghi_D08G04651.gene	0	1		Ghi_D13G11721.gene	-2.51998	0.246717
Ghi_D08G04656.gene	0	1		Ghi_D08G04656.gene	0	1		Ghi_A02G00051.gene	-2.51945	0.254696
Ghi_A04G06591.gene	0	1		Ghi_A04G06591.gene	0	1		Ghi_A13G06116.gene	-2.51411	2.63239939043e-20
Ghi_A01G05016.gene	3.34747	8.39085862913e-05		Ghi_A01G05016.gene	-0.550984	0.741573		Ghi_A12G05721.gene	-2.51298	0.247627
Ghi_D13G09251.gene	0	1		Ghi_D13G09251.gene	0	1		Ghi_A05G17436.gene	-2.51296	0.24678
Ghi_A10G05931.gene	0	1		Ghi_A10G05931.gene	0	1		Ghi_D13G11436.gene	-2.51226	0.06707
Ghi_A10G05936.gene	-0.396627	0.0027784963889		Ghi_A10G05936.gene	-0.330272	0.0228095		Ghi_A08G08951.gene	-2.51154	0.227683
Ghi_A09G14156.gene	1.52856	1.4158895219e-07		Ghi_A09G14156.gene	-0.489972	0.187578		Ghi_A11G05416.gene	-2.50784	4.33533606656e-46
Ghi_A06G07041.gene	0	1		Ghi_A06G07041.gene	0	1		Ghi_A06G02201.gene	-2.50603	0.25134
Ghi_A06G11211.gene	0.0211773539514	0.933355		Ghi_A06G11211.gene	0.124792	0.631213		Ghi_A07G08111.gene	-2.50601	0.250488
Ghi_A06G07046.gene	0	1		Ghi_A06G07046.gene	0	1		Ghi_A01G09176.gene	-2.50601	0.250488
Ghi_A11G04496.gene	-0.494697	0.0111614913495		Ghi_A11G04496.gene	-0.0101373	0.955893		Ghi_D12G07046.gene	-2.50459	0.223523
Ghi_A10G08511.gene	-2.09404	2.06133126459e-08		Ghi_A10G08511.gene	0.214458	0.438569		Ghi_A11G17886.gene	-2.50438	0.251769
Ghi_A10G08516.gene	0.319099	0.732319		Ghi_A10G08516.gene	0.119739	0.904036		Ghi_D03G09051.gene	-2.49933	0.00258445647767
Ghi_A11G04491.gene	2.03677	6.63876608009e-66		Ghi_A11G04491.gene	0.533831	3.95350465114e-05		Ghi_A12G14816.gene	-2.49907	0.260249
Ghi_A09G14151.gene	-2.43006	0.24917		Ghi_A09G14151.gene	0.00549777962034	0.997144		Ghi_D01G04951.gene	-2.49853	0.451365
Ghi_D10G01731.gene	1.02262	0.802113		Ghi_D10G01731.gene	0.982753	0.809677		Ghi_A09G15466.gene	-2.49853	0.451365
Ghi_A07G10236.gene	0	1		Ghi_A07G10236.gene	0	1		Ghi_D02G06526.gene	-2.49853	0.451365
Ghi_D10G01736.gene	1.05845	0.0429271596404		Ghi_D10G01736.gene	1.28935	0.00463051736693		Ghi_D11G16781.gene	-2.49853	0.451365
Ghi_A06G02671.gene	0	1		Ghi_A06G02671.gene	0	1		Ghi_A11G14961.gene	-2.49853	0.451365
Ghi_D03G06076.gene	0	1		Ghi_D03G06076.gene	0	1		Ghi_A07G11676.gene	-2.49853	0.451365
Ghi_D06G06391.gene	0.106177	0.519828		Ghi_D06G06391.gene	0.0529442785886	0.67843		Ghi_D08G02331.gene	-2.49853	0.451365
Ghi_D07G04876.gene	0	1		Ghi_D07G04876.gene	0.982753	0.809677		Ghi_D01G01761.gene	-2.49853	0.451365
Ghi_D07G04871.gene	-0.0524181	0.811807		Ghi_D07G04871.gene	0.167578	0.388186		Ghi_A05G21066.gene	-2.49853	0.451365
Ghi_D06G06396.gene	0.392892	0.675017		Ghi_D06G06396.gene	-1.06141	0.397155		Ghi_A10G07786.gene	-2.49853	0.451365
Ghi_D03G06071.gene	-0.0866706	0.773024		Ghi_D03G06071.gene	-0.155795	0.624969		GhiUnG03296.gene	-2.49853	0.451365
Ghi_A06G02676.gene	-1.8003	0.647176		Ghi_A06G02676.gene	-1.84052	0.626863		Ghi_A03G10401.gene	-2.49853	0.451365
Ghi_A08G11436.gene	-3.23837	1.97420026187e-12		Ghi_A08G11436.gene	-1.22604	0.00134373899625		Ghi_A13G04261.gene	-2.49853	0.451365
Ghi_A05G23796.gene	-0.775282	3.72646237866e-11		Ghi_A05G23796.gene	0.111847	0.339941		Ghi_A12G03441.gene	-2.49853	0.451365
Ghi_A05G23791.gene	0.169965	0.541011		Ghi_A05G23791.gene	-0.521361	0.0930146922792		Ghi_A03G10546.gene	-2.49853	0.451365
Ghi_A01G09666.gene	0	1		Ghi_A01G09666.gene	0	1		GhiUnG00491.gene	-2.49853	0.451365
Ghi_A01G09661.gene	0	1		Ghi_A01G09661.gene	0	1		Ghi_A06G10786.gene	-2.49853	0.451365
Ghi_D12G12471.gene	2.01777	2.0454122157e-07		Ghi_D12G12471.gene	0.35257	0.490269		Ghi_D09G03706.gene	-2.49853	0.451365
Ghi_D12G12476.gene	-1.0059	0.00357385056105		Ghi_D12G12476.gene	-0.442443	0.202718		GhiUnG01991.gene	-2.49853	0.451365
Ghi_A01G13006.gene	0	1		Ghi_A01G13006.gene	0	1		Ghi_D01G07336.gene	-2.49853	0.451365
Ghi_A03G09431.gene	-0.328097	0.300554		Ghi_A03G09431.gene	0.127896	0.648539		Ghi_A09G01526.gene	-2.49853	0.451365
Ghi_A09G13831.gene	2.11427	0.0462955		Ghi_A09G13831.gene	1.52898	0.165874		Ghi_D11G03781.gene	-2.49853	0.451365
Ghi_A09G13836.gene	3.44042	1.02049493385e-08		Ghi_A09G13836.gene	0.784089	0.238794		Ghi_A10G11211.gene	-2.49853	0.451365
Ghi_D01G12146.gene	-0.561178	0.0185848843584		Ghi_D01G12146.gene	-0.197125	0.339335		Ghi_D02G09756.gene	-2.4923	0.000125874621797
Ghi_A12G05016.gene	-1.84003	6.05967698248e-55		Ghi_A12G05016.gene	-0.115446	0.244232		Ghi_A02G01936.gene	-2.49021	0.223812
Ghi_A06G04636.gene	0	1		Ghi_A06G04636.gene	0	1		Ghi_A12G13991.gene	-2.49021	0.223812
Ghi_D07G01071.gene	-4.13196	1.23830890307e-08		Ghi_D07G01071.gene	1.60189	2.53541420878e-08		Ghi_A08G14316.gene	-2.49021	0.223039
Ghi_D10G09251.gene	0	1		Ghi_D10G09251.gene	0	1		Ghi_A12G05911.gene	-2.49021	0.222869
Ghi_D10G09256.gene	0.0608420415595	0.987637		Ghi_D10G09256.gene	0.0209820752121	0.995585		Ghi_A09G14071.gene	-2.48942	0.253148
Ghi_D08G06436.gene	-0.777909	0.19135		Ghi_D08G06436.gene	-0.408877	0.450389		Ghi_A05G22171.gene	-2.48942	0.252955
Ghi_A06G04631.gene	-1.63652	2.27452054077e-13		Ghi_A06G04631.gene	0.163333	0.365856		Ghi_A05G00776.gene	-2.48702	0.0169745821763
Ghi_A04G03411.gene	0	1		Ghi_A04G03411.gene	0	1		Ghi_A03G07151.gene	-2.48657	1.21416444959e-13
Ghi_D01G09546.gene	0	1		Ghi_D01G09546.gene	0	1		Ghi_A13G03056.gene	-2.48655	0.144553
Ghi_D01G09541.gene	0	1		Ghi_D01G09541.gene	0	1		Ghi_D12G02456.gene	-2.48564	0.153849
Ghi_A04G03416.gene	0	1		Ghi_A04G03416.gene	0	1		Ghi_D07G13026.gene	-2.48463	7.0387590439e-15
Ghi_D10G00686.gene	-5.32012	0.00064957601808		Ghi_D10G00686.gene	-2.91729	0.0158333548573		Ghi_D11G15861.gene	-2.48395	0.263245
Ghi_D06G02956.gene	0	1		Ghi_D06G02956.gene	0	1		Ghi_D12G07711.gene	-2.48394	0.264299
Ghi_D13G03396.gene	-5.34809	1.46594958617e-05		Ghi_D13G03396.gene	-3.22441	3.74696584772e-05		Ghi_D12G00071.gene	-2.48339	0.229059
Ghi_A01G13001.gene	0	1		Ghi_A01G13001.gene	0	1		Ghi_D11G15916.gene	-2.48338	0.229843
Ghi_A01G12471.gene	0.00309136986531	0.977052		Ghi_A01G12471.gene	-0.104608	0.345079		Ghi_D06G10126.gene	-2.48301	0.119875
Ghi_D06G02951.gene	0.714802	0.000557737164175		Ghi_D06G02951.gene	0.24478	0.277666		Ghi_A07G05426.gene	-2.48279	0.416884
Ghi_D04G09806.gene	0	1		Ghi_D04G09806.gene	0.982753	0.809677		Ghi_A01G05586.gene	-2.48279	0.416884
Ghi_A10G03696.gene	0.17057	0.233519		Ghi_A10G03696.gene	0.118111	0.407215		Ghi_D13G04201.gene	-2.48279	0.416884
Ghi_A10G03691.gene	2.25966	0.346764		Ghi_A10G03691.gene	-0.9408	0.817655		Ghi_A13G09456.gene	-2.48279	0.416884
Ghi_D04G09801.gene	-3.75771	1.35745577468e-05		Ghi_D04G09801.gene	-0.952446	0.0716733		Ghi_A11G04586.gene	-2.48279	0.416884
Ghi_A01G12476.gene	-0.0492433	0.792471		Ghi_A01G12476.gene	0.0418558322556	0.794519		Ghi_D06G09631.gene	-2.48279	0.416884
Ghi_A09G05721.gene	0.221559	0.363448		Ghi_A09G05721.gene	0.0249812866081	0.916872		Ghi_A09G04216.gene	-2.48279	0.416884
Ghi_D11G13826.gene	-0.0644716	0.710161		Ghi_D11G13826.gene	-0.422133	0.0185714		Ghi_A02G05661.gene	-2.48279	0.416884
Ghi_A09G00531.gene	0.749648	5.2841910696e-06		Ghi_A09G00531.gene	0.456649	0.00395280089175		Ghi_A01G03196.gene	-2.48279	0.416884
Ghi_A05G23241.gene	-0.111312	0.91148		Ghi_A05G23241.gene	0.154578	0.847272		Ghi_D04G04051.gene	-2.48279	0.416884
Ghi_A05G23246.gene	0	1		Ghi_A05G23246.gene	0	1		Ghi_D05G05056.gene	-2.48279	0.416884
Ghi_A09G00536.gene	-0.871972	0.246703		Ghi_A09G00536.gene	-1.36793	0.0990142793254		Ghi_A11G18021.gene	-2.48279	0.416884
Ghi_D11G13821.gene	-2.90061	1.22781753469e-13		Ghi_D11G13821.gene	-0.456852	0.10252		Ghi_A13G03611.gene	-2.48279	0.416884
Ghi_A09G05726.gene	0.311856	0.0500616		Ghi_A09G05726.gene	-0.0389823	0.817379		Ghi_D06G05106.gene	-2.48279	0.416884
Ghi_A11G14711.gene	-0.90093	0.825256		Ghi_A11G14711.gene	-0.9408	0.817655		Ghi_D07G03606.gene	-2.48279	0.416884
Ghi_A01G02361.gene	0	1		Ghi_A01G02361.gene	0	1		Ghi_A01G00361.gene	-2.48279	0.416884
Ghi_A01G06861.gene	0	1		Ghi_A01G06861.gene	0	1		Ghi_A05G15591.gene	-2.48257	0.229092
Ghi_A01G09591.gene	0.595781	9.86178490139e-05		Ghi_A01G09591.gene	0.402077	0.0109514766354		Ghi_D03G06711.gene	-2.48246	0.118219
Ghi_A01G09596.gene	-3.91226	0.0237579249278		Ghi_A01G09596.gene	-2.47438	0.0813275167694		Ghi_A09G04286.gene	-2.48106	0.129246
Ghi_A01G06866.gene	0	1		Ghi_A01G06866.gene	0	1		Ghi_A13G00231.gene	-2.47943	0.122304
Ghi_A01G02366.gene	-4.54267	4.49507617475e-78		Ghi_A01G02366.gene	-0.233934	0.161371		Ghi_A13G11176.gene	-2.47889	1.14528229595e-10
Ghi_A11G14716.gene	0	1		Ghi_A11G14716.gene	0	1		Ghi_A12G08081.gene	-2.47811	0.0781329015988
Ghi_A04G01816.gene	-1.09901	0.106335		Ghi_A04G01816.gene	-0.725884	0.248137		Ghi_A13G00386.gene	-2.47798	0.0110667769414
Ghi_D08G11486.gene	-0.534297	3.56593404498e-11		Ghi_D08G11486.gene	-0.0498706	0.546414		Ghi_D10G08431.gene	-2.47572	0.230904
Ghi_A08G14566.gene	0.503083	0.00220799010642		Ghi_A08G14566.gene	-0.0931518	0.606104		Ghi_D01G05811.gene	-2.47571	0.231079
Ghi_A04G01811.gene	-1.39589	9.14614347822e-22		Ghi_A04G01811.gene	-0.455767	0.000401274960763		Ghi_A01G01411.gene	-2.47571	0.231079
Ghi_A09G06261.gene	0.413031	0.00264518439847		Ghi_A09G06261.gene	0.0245031109931	0.861923		Ghi_A01G04941.gene	-2.47435	0.258919
Ghi_D06G04826.gene	0	1		Ghi_D06G04826.gene	0	1		Ghi_A03G09531.gene	-2.47435	0.258919
Ghi_D01G04071.gene	0	1		Ghi_D01G04071.gene	0	1		Ghi_A12G11716.gene	-2.47435	0.259116
Ghi_D08G07306.gene	-0.041326	0.7191		Ghi_D08G07306.gene	-0.0759139	0.521521		Ghi_A08G14231.gene	-2.47123	8.56294854713e-108
Ghi_D08G07301.gene	0.0454880410852	0.987007		Ghi_D08G07301.gene	1.04017	0.684248		Ghi_A10G02496.gene	-2.46905	0.141292
Ghi_D01G04076.gene	1.06261	0.202265		Ghi_D01G04076.gene	1.40533	0.0535590869144		Ghi_D05G00776.gene	-2.46835	0.421543
Ghi_D06G04821.gene	0	1		Ghi_D06G04821.gene	0	1		Ghi_D12G03251.gene	-2.46835	0.421543
Ghi_A09G06266.gene	0.545661	1.80675029853e-05		Ghi_A09G06266.gene	-0.00635013	0.963064		Ghi_A11G15281.gene	-2.46835	0.421543
Ghi_A04G07241.gene	4.4762	0.00339949411601		Ghi_A04G07241.gene	0.910708	0.762785		Ghi_A09G13426.gene	-2.46835	0.421543
Ghi_A01G10836.gene	-0.895112	0.226358		Ghi_A01G10836.gene	0.341647	0.575845		Ghi_A13G00101.gene	-2.46835	0.421543
Ghi_A01G10831.gene	0	1		Ghi_A01G10831.gene	0	1		Ghi_D01G04221.gene	-2.46835	0.421543
Ghi_A04G07246.gene	-0.112017	0.631525		Ghi_A04G07246.gene	1.00775	7.79294395711e-07		Ghi_D05G10726.gene	-2.46835	0.421543
Ghi_A09G02971.gene	0.0366087648959	0.738572		Ghi_A09G02971.gene	-0.0504917	0.655597		Ghi_A11G16376.gene	-2.46835	0.421543
Ghi_D08G02761.gene	0	1		Ghi_D08G02761.gene	0	1		Ghi_A05G23601.gene	-2.46835	0.421543
Ghi_D07G01966.gene	-0.696302	0.000108954678754		Ghi_D07G01966.gene	-0.302263	0.0839427087724		Ghi_A12G01936.gene	-2.46835	0.421543
Ghi_A09G03706.gene	0	1		Ghi_A09G03706.gene	0	1		Ghi_D02G01066.gene	-2.46835	0.421543
Ghi_D07G01961.gene	-0.0870299	0.741303		Ghi_D07G01961.gene	-0.0404332	0.876095		Ghi_D13G12581.gene	-2.46835	0.421543
Ghi_D08G02766.gene	0.0946025083219	0.570819		Ghi_D08G02766.gene	0.29475	0.0599424		Ghi_A11G03821.gene	-2.46835	0.421543
Ghi_A09G02976.gene	0	1		Ghi_A09G02976.gene	0	1		Ghi_A12G08921.gene	-2.46835	0.421543
Ghi_A05G19426.gene	0	1		Ghi_A05G19426.gene	0	1		Ghi_D11G04866.gene	-2.46835	0.421543
Ghi_D08G06651.gene	1.0562	0.0135516		Ghi_D08G06651.gene	1.426	0.000577507969004		Ghi_D03G09396.gene	-2.46835	0.421543
Ghi_A05G01176.gene	5.28718	1.08943465091e-227		Ghi_A05G01176.gene	0.262341	0.403251		Ghi_D13G08536.gene	-2.46835	0.421543
Ghi_A05G01171.gene	2.48946	0.454748		Ghi_A05G01171.gene	0	1		Ghi_A03G05191.gene	-2.46832	0.119509
Ghi_D08G06656.gene	2.25872	0.000518697312106		Ghi_D08G06656.gene	2.51847	4.63974279627e-05		Ghi_A05G10086.gene	-2.46805	0.259937
Ghi_A07G00761.gene	0.0856744790251	0.779998		Ghi_A07G00761.gene	-0.169564	0.583294		Ghi_D08G06966.gene	-2.46781	0.238992
Ghi_D05G13711.gene	-0.308804	0.0106615		Ghi_D05G13711.gene	0.150888	0.183533		Ghi_D04G04216.gene	-2.46781	0.238992
Ghi_D05G13716.gene	1.11025	0.0254549133822		Ghi_D05G13716.gene	0.266811	0.64011		Ghi_A07G04291.gene	-2.46781	0.239169
Ghi_A07G00766.gene	0	1		Ghi_A07G00766.gene	0	1		Ghi_D11G04396.gene	-2.46781	0.239169
Ghi_A05G09361.gene	2.08621	5.42417045279e-06		Ghi_A05G09361.gene	2.18541	2.71284010128e-09		Ghi_D05G03766.gene	-2.46668	0.422057
Ghi_A08G02381.gene	0.0367325	0.770697		Ghi_A08G02381.gene	-0.24476	0.0954256214712		Ghi_A12G07376.gene	-2.46668	0.422057
Ghi_A07G10231.gene	0.158655	0.715821		Ghi_A07G10231.gene	-0.121564	0.791369		Ghi_A05G12851.gene	-2.46668	0.422057
Ghi_A08G02386.gene	-0.695829	0.00792797902298		Ghi_A08G02386.gene	-0.54143	0.0223993129052		Ghi_D05G00181.gene	-2.46668	0.422057
Ghi_A07G11206.gene	0.518948	0.339495		Ghi_A07G11206.gene	0.35162	0.503119		Ghi_A09G10801.gene	-2.46668	0.422057
Ghi_A05G09366.gene	3.8685	3.12895349797e-13		Ghi_A05G09366.gene	2.50161	5.39229211179e-05		Ghi_D08G02266.gene	-2.46668	0.422057
Ghi_D12G06866.gene	-0.15831	0.0480436366612		Ghi_D12G06866.gene	-0.0978244	0.23527		Ghi_A07G00946.gene	-2.46668	0.422057
Ghi_A07G07231.gene	-0.12564	0.230914		Ghi_A07G07231.gene	-0.276871	0.0109585616988		Ghi_D11G07446.gene	-2.46668	0.422057
Ghi_A08G08126.gene	0.0162332	0.932111		Ghi_A08G08126.gene	0.160152	0.395025		Ghi_A12G06251.gene	-2.46668	0.422057
Ghi_A08G08121.gene	-1.4603	2.40476636259e-45		Ghi_A08G08121.gene	-0.130098	0.128761		Ghi_A09G07066.gene	-2.46668	0.422057
Ghi_A07G07236.gene	-1.75247	5.66700929066e-05		Ghi_A07G07236.gene	-0.309006	0.401646		Ghi_D02G04796.gene	-2.46668	0.422057
Ghi_D12G06861.gene	-0.151125	0.799722		Ghi_D12G06861.gene	0.66452	0.192364		GhiUnG01466.gene	-2.46668	0.422057
Ghi_A11G01771.gene	-1.20449	5.1709696805e-14		Ghi_A11G01771.gene	-0.714363	3.26328774492e-07		Ghi_D12G07196.gene	-2.46668	0.422057
Ghi_A06G04091.gene	0	1		Ghi_A06G04091.gene	0.982753	0.809677		Ghi_D11G07916.gene	-2.46668	0.422057
Ghi_A06G04096.gene	-0.635154	0.000301345980219		Ghi_A06G04096.gene	-0.0949882	0.522087		Ghi_A10G11201.gene	-2.46541	4.46846221764e-06
Ghi_A13G07741.gene	-4.90941	0.00105872731559		Ghi_A13G07741.gene	-2.05316	0.0273891831196		Ghi_A06G00136.gene	-2.45902	1.1377791753e-05
Ghi_D02G08761.gene	2.53561	0.440939		Ghi_D02G08761.gene	0.982753	0.809677		Ghi_A09G05506.gene	-2.45888	0.270448
Ghi_D12G15121.gene	1.94698	7.94549895643e-42		Ghi_D12G15121.gene	-0.118509	0.412001		Ghi_A08G04371.gene	-2.45644	1.81499290328e-16
Ghi_D12G15126.gene	0	1		Ghi_D12G15126.gene	0	1		Ghi_A03G03341.gene	-2.4547	0.141779
Ghi_D02G08766.gene	0.0517538838883	0.771622		Ghi_D02G08766.gene	0.144432	0.400198		Ghi_A12G13296.gene	-2.45383	0.465436
Ghi_A03G05326.gene	0	1		Ghi_A03G05326.gene	0	1		Ghi_A07G02501.gene	-2.45383	0.465436
Ghi_A10G06346.gene	-0.525764	0.136864		Ghi_A10G06346.gene	-0.398712	0.239568		Ghi_A02G09166.gene	-2.45383	0.465436
Ghi_A11G01956.gene	0.442687	0.00979128934997		Ghi_A11G01956.gene	0.239601	0.193431		Ghi_A01G00806.gene	-2.45383	0.465436
Ghi_A10G06341.gene	0	1		Ghi_A10G06341.gene	0	1		Ghi_A05G01181.gene	-2.45383	0.465436
Ghi_A06G05946.gene	0	1		Ghi_A06G05946.gene	0	1		Ghi_D13G13491.gene	-2.45383	0.465436
Ghi_D03G08021.gene	0.582053	0.0273153786726		Ghi_D03G08021.gene	0.13842	0.630501		Ghi_A11G14236.gene	-2.45383	0.465436
Ghi_A06G05941.gene	-2.25583	5.1026408547e-12		Ghi_A06G05941.gene	-0.422766	0.113342		Ghi_D03G09241.gene	-2.45383	0.465436
Ghi_D05G03766.gene	2.52136	0.445188		Ghi_D05G03766.gene	0	1		Ghi_A05G00356.gene	-2.45383	0.465436
Ghi_A03G09846.gene	0	1		Ghi_A03G09846.gene	0	1		GhiUnG00436.gene	-2.45383	0.465436
Ghi_A04G00141.gene	5.65142	2.12619767639e-09		Ghi_A04G00141.gene	2.33558	0.0861962792513		Ghi_D08G02966.gene	-2.45383	0.465436
Ghi_A04G00146.gene	0	1		Ghi_A04G00146.gene	0	1		Ghi_A06G01411.gene	-2.45383	0.465436
Ghi_D05G03761.gene	0.0813387580622	0.9614		Ghi_D05G03761.gene	0.30821	0.848645		Ghi_A11G16941.gene	-2.45383	0.465436
Ghi_A08G02651.gene	0.244608	0.27724		Ghi_A08G02651.gene	0.0400681423031	0.859423		Ghi_D09G07011.gene	-2.45383	0.465436
Ghi_D07G06521.gene	0.433614	0.000619974126768		Ghi_D07G06521.gene	0.133167	0.319182		Ghi_D11G14531.gene	-2.45383	0.465436
Ghi_D10G05736.gene	0.179869	0.129921		Ghi_D10G05736.gene	-0.0658202	0.585821		Ghi_D13G02371.gene	-2.45383	0.465436
Ghi_D10G05731.gene	-1.35732	8.65181253453e-15		Ghi_D10G05731.gene	-0.259419	0.0759936689295		Ghi_A05G08741.gene	-2.45205	0.392579
Ghi_A03G05321.gene	0	1		Ghi_A03G05321.gene	0.982753	0.809677		Ghi_D02G01316.gene	-2.45205	0.392579
Ghi_A08G02656.gene	0	1		Ghi_A08G02656.gene	0	1		Ghi_A11G16051.gene	-2.45205	0.392579
Ghi_A09G08131.gene	-0.212688	0.662499		Ghi_A09G08131.gene	0.333217	0.453107		Ghi_A04G03026.gene	-2.45205	0.392579
Ghi_A03G09661.gene	-1.01621	3.91591689649e-07		Ghi_A03G09661.gene	-0.232861	0.194408		Ghi_A05G06196.gene	-2.45205	0.392579
Ghi_A05G08186.gene	-1.94745	0.187005		Ghi_A05G08186.gene	0.76777	0.416827		Ghi_A04G02411.gene	-2.45205	0.392579
Ghi_D10G06286.gene	-0.0382149	0.728438		Ghi_D10G06286.gene	-0.150188	0.180258		Ghi_A01G09586.gene	-2.45205	0.392579
Ghi_D09G01716.gene	0	1		Ghi_D09G01716.gene	0	1		Ghi_A12G06531.gene	-2.45205	0.392579
Ghi_D10G06281.gene	0.366991	0.102415		Ghi_D10G06281.gene	0.0121392043721	0.963585		Ghi_A05G15256.gene	-2.45205	0.392579
Ghi_A05G08181.gene	3.45959	2.13527031422e-250		Ghi_A05G08181.gene	1.01837	8.06519788721e-14		Ghi_A05G05026.gene	-2.45205	0.392579
Ghi_D04G02971.gene	0	1		Ghi_D04G02971.gene	0	1		Ghi_A09G10766.gene	-2.45205	0.392579
Ghi_A09G02396.gene	-0.70364	0.567473		Ghi_A09G02396.gene	-1.96253	0.192179		Ghi_D11G18321.gene	-2.45205	0.392579
Ghi_A09G02391.gene	0	1		Ghi_A09G02391.gene	0	1		Ghi_D05G13836.gene	-2.45205	0.392579
Ghi_A03G12581.gene	0.126869	0.381353		Ghi_A03G12581.gene	0.0483545810161	0.767848		Ghi_D12G03876.gene	-2.45205	0.392579
Ghi_D04G02976.gene	-0.134063	0.287119		Ghi_D04G02976.gene	-0.011703	0.925545		Ghi_A02G00961.gene	-2.45205	0.392579
Ghi_D11G15281.gene	0.558827	0.59235		Ghi_D11G15281.gene	-0.984249	0.488519		Ghi_A10G10831.gene	-2.45205	0.392579
Ghi_A07G10876.gene	-0.353277	0.225538		Ghi_A07G10876.gene	-0.236422	0.38357		Ghi_D13G11931.gene	-2.45205	0.392579
Ghi_A12G08906.gene	0.156538	0.828619		Ghi_A12G08906.gene	-0.629113	0.427994		Ghi_D01G10166.gene	-2.45205	0.392579
Ghi_D11G15286.gene	1.94189	0.613974		Ghi_D11G15286.gene	0	1		Ghi_A07G05546.gene	-2.45205	0.392579
Ghi_D04G09116.gene	-0.294329	0.00453181025222		Ghi_D04G09116.gene	-0.233303	0.0240208792278		Ghi_A04G04566.gene	-2.45158	0.272497
Ghi_D03G09771.gene	0	1		Ghi_D03G09771.gene	0	1		Ghi_D02G03271.gene	-2.44988	0.0157276
Ghi_A09G12046.gene	0.251842	0.283105		Ghi_A09G12046.gene	0.150902	0.49037		Ghi_D05G07526.gene	-2.44925	5.2374602351e-12
Ghi_D07G06526.gene	-1.62694	8.75620528294e-05		Ghi_D07G06526.gene	-0.465035	0.176326		Ghi_D02G02666.gene	-2.44906	0.00552009485927
Ghi_A09G12041.gene	0.62775	1.3578473818e-06		Ghi_A09G12041.gene	0.302584	0.0257561718922		Ghi_D02G09211.gene	-2.44879	0.170835
Ghi_D04G09111.gene	-2.38955	0.477258		Ghi_D04G09111.gene	-1.46757	0.588905		Ghi_D12G13316.gene	-2.44592	0.0667441596037
Ghi_D10G07771.gene	-4.33703	2.65266640029e-21		Ghi_D10G07771.gene	-0.237033	0.284765		Ghi_D11G03756.gene	-2.44557	0.0716108121067
Ghi_D10G07776.gene	0	1		Ghi_D10G07776.gene	0	1		Ghi_A11G16081.gene	-2.44296	0.0659513955297
Ghi_D07G12576.gene	0.664792	1.50760529636e-09		Ghi_D07G12576.gene	-0.0556039	0.580248		Ghi_D01G11011.gene	-2.44182	0.308107
Ghi_A13G02056.gene	-2.74406	6.02718950929e-06		Ghi_A13G02056.gene	0.0809613432108	0.835146		Ghi_D13G08976.gene	-2.43982	0.0768475306483
Ghi_D08G05231.gene	0.0751001082739	0.705862		Ghi_D08G05231.gene	0.437807	0.0223813127015		Ghi_D05G02601.gene	-2.43733	0.431557
Ghi_A05G09586.gene	0.22483	0.297769		Ghi_A05G09586.gene	0.139976	0.519341		Ghi_A10G06426.gene	-2.43733	0.431557
Ghi_A05G09581.gene	-0.277631	0.0893475109864		Ghi_A05G09581.gene	-0.103561	0.509687		Ghi_A08G05671.gene	-2.43733	0.431557
Ghi_D08G05236.gene	0.673845	7.97999176e-10		Ghi_D08G05236.gene	0.239826	0.0253075758266		Ghi_A05G08986.gene	-2.43733	0.431557
Ghi_A11G17706.gene	2.45498	0.526397		Ghi_A11G17706.gene	3.20845	0.224133		Ghi_A07G11641.gene	-2.43733	0.431557
Ghi_D08G03686.gene	-0.371595	0.27371		Ghi_D08G03686.gene	-0.0232185	0.938296		Ghi_A08G06256.gene	-2.43733	0.431557
Ghi_D08G03681.gene	0.23484	0.2359		Ghi_D08G03681.gene	1.16699	1.60823304609e-14		Ghi_D07G00406.gene	-2.43733	0.431557
Ghi_A05G07631.gene	3.803	4.64900193308e-13		Ghi_A05G07631.gene	0.210739	0.832945		Ghi_A06G04421.gene	-2.43733	0.431557
Ghi_A09G03371.gene	-2.94398	0.0497103162167		Ghi_A09G03371.gene	-0.516233	0.605434		Ghi_A11G01646.gene	-2.43733	0.431557
Ghi_D11G14886.gene	-2.13717	2.38015961314e-52		Ghi_D11G14886.gene	-0.137291	0.219892		Ghi_A13G00736.gene	-2.43733	0.431557
Ghi_A11G00551.gene	0.0385099389716	0.773467		Ghi_A11G00551.gene	-0.131785	0.324175		Ghi_A01G10371.gene	-2.43733	0.431557
Ghi_A11G00556.gene	5.5339	1.48172868307e-06		Ghi_A11G00556.gene	2.35635	0.179156		Ghi_D10G06816.gene	-2.43733	0.431557
Ghi_D11G14881.gene	-1.09618	4.5078781735e-14		Ghi_D11G14881.gene	5.12889722851e-05	0.999613		Ghi_A06G04691.gene	-2.43733	0.431557
Ghi_A09G03376.gene	-3.82498	1.23560360526e-70		Ghi_A09G03376.gene	-0.978018	7.92211375838e-10		Ghi_A01G08996.gene	-2.43733	0.431557
Ghi_A05G07636.gene	-0.399587	0.0766578		Ghi_A05G07636.gene	-0.314484	0.152475		Ghi_D13G04046.gene	-2.43733	0.431557
Ghi_A01G10161.gene	0.488896	0.00168932570686		Ghi_A01G10161.gene	0.23048	0.14428		Ghi_A05G17121.gene	-2.43733	0.431557
Ghi_A11G06256.gene	1.97797	2.16383401046e-33		Ghi_A11G06256.gene	0.0749491333376	0.657866		Ghi_A09G10261.gene	-2.43563	0.432085
Ghi_D06G01956.gene	0	1		Ghi_D06G01956.gene	0	1		Ghi_D13G04326.gene	-2.43563	0.432085
Ghi_A11G01206.gene	0.335187	0.0150505090224		Ghi_A11G01206.gene	0.0454402	0.750283		Ghi_D04G09256.gene	-2.43563	0.432085
Ghi_A11G01201.gene	1.50497	7.30787585238e-11		Ghi_A11G01201.gene	1.00643	4.25387813564e-07		Ghi_A09G13041.gene	-2.43563	0.432085
Ghi_D06G01951.gene	0	1		Ghi_D06G01951.gene	0	1		Ghi_D12G10491.gene	-2.43563	0.432085
Ghi_A11G06251.gene	-1.09648	2.55572276689e-16		Ghi_A11G06251.gene	-0.186858	0.143472		Ghi_D10G13646.gene	-2.43563	0.432085
Ghi_A01G10166.gene	-0.871175	7.88078001404e-15		Ghi_A01G10166.gene	0.146638	0.128572		Ghi_A13G08741.gene	-2.43563	0.432085
Ghi_D07G01036.gene	-0.90093	0.825256		Ghi_D07G01036.gene	-0.9408	0.817655		Ghi_A08G10896.gene	-2.43563	0.432085
Ghi_A05G06581.gene	-0.166172	0.550378		Ghi_A05G06581.gene	-0.705565	0.0253638266138		Ghi_A13G08156.gene	-2.43563	0.432085
Ghi_A09G02021.gene	0.661197	0.00341792289968		Ghi_A09G02021.gene	0.212599	0.400172		Ghi_D11G09646.gene	-2.43563	0.432085
Ghi_D11G10506.gene	-1.24594	2.75569927466e-10		Ghi_D11G10506.gene	0.251661	0.117035		Ghi_D12G11881.gene	-2.43563	0.432085
Ghi_D11G10501.gene	0.482935	5.54611438602e-05		Ghi_D11G10501.gene	0.688223	9.382190205e-09		Ghi_A05G20176.gene	-2.43563	0.432085
Ghi_A09G02026.gene	0.61299	5.50827062925e-09		Ghi_A09G02026.gene	-0.0534401	0.631246		Ghi_A02G06851.gene	-2.43563	0.432085
Ghi_A05G06586.gene	-0.475145	8.15849567593e-05		Ghi_A05G06586.gene	-0.472268	0.000613767078885		Ghi_D13G11121.gene	-2.43563	0.432085
Ghi_D07G01031.gene	0.290023	0.320014		Ghi_D07G01031.gene	-0.0547653	0.856578		Ghi_A11G05186.gene	-2.43563	0.432085
Ghi_A09G01286.gene	0.298064	0.0131297103022		Ghi_A09G01286.gene	0.145276	0.213959		Ghi_A12G04046.gene	-2.43563	0.432085
Ghi_D04G00231.gene	-1.52301	0.00639699215557		Ghi_D04G00231.gene	-1.09814	0.0317912		Ghi_D10G09461.gene	-2.43563	0.432085
Ghi_A08G09296.gene	0.273499	0.387429		Ghi_A08G09296.gene	0.265529	0.365205		Ghi_A09G09796.gene	-2.43563	0.432085
Ghi_D11G08176.gene	-3.6725	3.18133922145e-06		Ghi_D11G08176.gene	-1.0555	0.0365934054167		Ghi_D12G02156.gene	-2.43563	0.432085
Ghi_A08G09291.gene	-0.104724	0.661066		Ghi_A08G09291.gene	-0.181275	0.491687		Ghi_D02G10076.gene	-2.43517	0.0654195415965
Ghi_D04G00236.gene	-0.902563	0.00606667439428		Ghi_D04G00236.gene	-0.593998	0.0553323		Ghi_A05G15966.gene	-2.43392	1.36464369505e-09
Ghi_A09G01281.gene	-2.78485	0.361722		Ghi_A09G01281.gene	-0.980562	0.678473		Ghi_D12G04966.gene	-2.42329	0.0693361484241
Ghi_D10G07481.gene	-1.43991	0.601446		Ghi_D10G07481.gene	-0.589118	0.801447		Ghi_A01G10866.gene	-2.42231	0.0696903206271
Ghi_A10G01586.gene	1.0509	2.19660803594e-05		Ghi_A10G01586.gene	0.561407	0.0415462254384		Ghi_D04G01926.gene	-2.42071	0.436927
Ghi_A12G11511.gene	0	1		Ghi_A12G11511.gene	0	1		Ghi_A03G08416.gene	-2.42071	0.436927
Ghi_A10G01581.gene	-4.04292	2.52343802511e-05		Ghi_A10G01581.gene	-0.046578	0.917488		Ghi_A01G10626.gene	-2.42071	0.436927
Ghi_D10G07486.gene	0	1		Ghi_D10G07486.gene	0	1		Ghi_D09G11166.gene	-2.42071	0.436927
Ghi_A11G02951.gene	-0.57542	0.00526531354472		Ghi_A11G02951.gene	-0.184173	0.333316		Ghi_A11G12901.gene	-2.42071	0.436927
Ghi_D06G00021.gene	0.129387	0.409727		Ghi_D06G00021.gene	-0.0385153	0.818746		Ghi_A08G13911.gene	-2.42071	0.436927
Ghi_A06G02451.gene	-0.229519	0.194688		Ghi_A06G02451.gene	-0.20087	0.255343		Ghi_A09G09101.gene	-2.42071	0.436927
Ghi_D06G00026.gene	-1.86351	8.13950922006e-61		Ghi_D06G00026.gene	0.231136	0.0211927098933		Ghi_D03G09891.gene	-2.42071	0.436927
Ghi_A04G05241.gene	-2.87804	3.70564099525e-42		Ghi_A04G05241.gene	-0.46311	0.00221337623599		Ghi_A03G07701.gene	-2.42071	0.436927
Ghi_A10G05696.gene	0.627626	2.40283349295e-13		Ghi_A10G05696.gene	0.0486269790947	0.584128		Ghi_D10G04316.gene	-2.42071	0.436927
Ghi_D11G16481.gene	2.02786	0.19468		Ghi_D11G16481.gene	1.58738	0.351798		Ghi_A01G05331.gene	-2.42071	0.436927
Ghi_D11G16486.gene	0	1		Ghi_D11G16486.gene	0	1		Ghi_D10G00741.gene	-2.42071	0.436927
Ghi_A10G05691.gene	-0.223015	0.44817		Ghi_A10G05691.gene	0.42667	0.107883		Ghi_D10G00921.gene	-2.42071	0.436927
Ghi_D11G00131.gene	0.380639	0.000868350457806		Ghi_D11G00131.gene	0.0696663478272	0.569101		Ghi_A09G08761.gene	-2.42071	0.436927
Ghi_A05G07186.gene	-1.71643	2.29854101662e-08		Ghi_A05G07186.gene	-0.0364287	0.86514		Ghi_D02G08701.gene	-2.42071	0.436927
Ghi_D08G03971.gene	-4.25364	0.0296459555519		Ghi_D08G03971.gene	0.264623	0.802763		Ghi_D05G09781.gene	-2.41922	0.00345565334471
Ghi_D08G03976.gene	0.338148	0.580886		Ghi_D08G03976.gene	-0.0246817	0.96897		Ghi_D09G07946.gene	-2.41337	7.07197195609e-29
Ghi_A05G03581.gene	0.205405	0.346218		Ghi_A05G03581.gene	0.399558	0.0604988906625		Ghi_D10G11521.gene	-2.41248	3.9160042305e-12
Ghi_A05G07181.gene	-0.178281	0.54323		Ghi_A05G07181.gene	-0.0310093	0.917248		Ghi_D11G06771.gene	-2.4107	6.61910641512e-35
Ghi_D11G00136.gene	-0.884956	5.32386951332e-07		Ghi_D11G00136.gene	-0.696347	2.06905589858e-05		Ghi_A09G06126.gene	-2.4024	0.481578
Ghi_A10G13531.gene	0	1		Ghi_A10G13531.gene	0	1		Ghi_A11G02236.gene	-2.4024	0.481578
Ghi_D02G05801.gene	-0.762733	0.0871535578925		Ghi_D02G05801.gene	0.1948	0.541352		Ghi_D10G01386.gene	-2.4024	0.481578
Ghi_A11G11891.gene	-0.13281	0.891091		Ghi_A11G11891.gene	-0.0826418	0.933765		Ghi_D13G05411.gene	-2.4024	0.481578
Ghi_A03G13396.gene	-1.8719	0.00601711583832		Ghi_A03G13396.gene	-1.06966	0.0609567797772		Ghi_A07G07761.gene	-2.4024	0.481578
Ghi_D06G00651.gene	0.29395	0.0046059682666		Ghi_D06G00651.gene	-0.0887778	0.383796		Ghi_D02G00896.gene	-2.4024	0.481578
Ghi_A02G04541.gene	0	1		Ghi_A02G04541.gene	0	1		Ghi_A06G12581.gene	-2.4024	0.481578
Ghi_D12G07806.gene	0.281615	0.0323377024147		Ghi_D12G07806.gene	0.0532229927636	0.681862		Ghi_A07G09301.gene	-2.4024	0.481578
Ghi_A05G15936.gene	0.0325931873216	0.990619		Ghi_A05G15936.gene	1.30654	0.553814		Ghi_D02G06901.gene	-2.4024	0.481578
Ghi_D08G04706.gene	-0.7746	2.43158270691e-06		Ghi_D08G04706.gene	-0.426289	0.0105678408204		Ghi_A09G08386.gene	-2.4024	0.481578
Ghi_D12G07801.gene	-1.20844	5.38832996599e-15		Ghi_D12G07801.gene	0.539313	3.75112506088e-05		Ghi_A05G06416.gene	-2.4024	0.481578
Ghi_A02G04546.gene	0.245332	0.107419		Ghi_A02G04546.gene	0.0950286991858	0.524625		Ghi_A09G11246.gene	-2.4024	0.481578
Ghi_A05G15776.gene	0.253179	0.103613		Ghi_A05G15776.gene	0.00451719039145	0.97715		Ghi_D04G00361.gene	-2.4024	0.481578
Ghi_A08G09741.gene	1.69547	2.1433576487e-12		Ghi_A08G09741.gene	0.555948	0.0425831557754		Ghi_D05G12611.gene	-2.4024	0.481578
Ghi_A08G09746.gene	-0.559397	0.0548541801657		Ghi_A08G09746.gene	-0.438541	0.0908792475538		Ghi_D06G11601.gene	-2.4024	0.481578
Ghi_A01G05011.gene	-1.81706	0.0424498259136		Ghi_A01G05011.gene	-6.03167	4.65684222961e-05		Ghi_D03G02101.gene	-2.4024	0.481578
Ghi_A05G15771.gene	0.565406	0.0116187358149		Ghi_A05G15771.gene	-0.288785	0.247501		Ghi_A12G06571.gene	-2.4024	0.481578
Ghi_A02G00251.gene	-0.341377	0.867093		Ghi_A02G00251.gene	0.0151828532118	0.993631		Ghi_D10G13591.gene	-2.4024	0.481578
Ghi_A13G06786.gene	0.828021	0.341013		Ghi_A13G06786.gene	-1.3525	0.301219		Ghi_D10G08401.gene	-2.4024	0.481578
Ghi_D13G09641.gene	-0.171835	0.758231		Ghi_D13G09641.gene	0.0743697834439	0.883546		Ghi_A03G02516.gene	-2.4024	0.481578
Ghi_D13G09646.gene	-0.426465	0.0193731844768		Ghi_D13G09646.gene	-0.349876	0.0365775278322		Ghi_A03G02511.gene	-2.4024	0.481578
Ghi_A13G06781.gene	0	1		Ghi_A13G06781.gene	0	1		Ghi_D04G08886.gene	-2.4024	0.481578
Ghi_A02G00256.gene	7.5717	7.87554179067e-29		Ghi_A02G00256.gene	0.714614	0.624052		Ghi_A05G19771.gene	-2.4024	0.481578
Ghi_D13G01096.gene	0.513779	1.17521327328e-06		Ghi_D13G01096.gene	-0.0431895	0.682898		Ghi_A10G01661.gene	-2.39975	6.19703433412e-17
Ghi_D06G00656.gene	-3.91413	3.45030375623e-26		Ghi_D06G00656.gene	0.0764956585882	0.688607		Ghi_A02G02586.gene	-2.39395	3.11696257008e-08
Ghi_A07G03446.gene	0.657864	0.799742		Ghi_A07G03446.gene	-0.857975	0.7774		Ghi_A05G13171.gene	-2.39213	0.0144276196716
Ghi_A08G01101.gene	-0.283017	0.0969380439605		Ghi_A08G01101.gene	-0.1288	0.429202		GhiUnG00986.gene	-2.38974	0.0490200517748
Ghi_D08G13946.gene	-0.90093	0.825256		Ghi_D08G13946.gene	-0.9408	0.817655		Ghi_A01G02286.gene	-2.38497	1.13824827482e-13
Ghi_A09G13796.gene	0.189993	0.0492175787724		Ghi_A09G13796.gene	-0.174254	0.0701440062648		Ghi_D05G08881.gene	-2.38331	0.097394
Ghi_A12G05446.gene	0	1		Ghi_A12G05446.gene	0	1		Ghi_A11G18796.gene	-2.38284	5.38268584256e-19
Ghi_D05G00746.gene	1.35533	1.29066769407e-11		Ghi_D05G00746.gene	0.720596	0.000238909449916		Ghi_A08G01371.gene	-2.38015	1.52601164217e-07
Ghi_A12G05441.gene	-1.10493	0.174627		Ghi_A12G05441.gene	-0.13892	0.845047		Ghi_A02G10041.gene	-2.37967	2.00334079941e-06
Ghi_A09G13791.gene	0	1		Ghi_A09G13791.gene	0.982753	0.809677		Ghi_D07G02646.gene	-2.37453	1.27673832597e-05
Ghi_D08G13941.gene	2.96767	0.129431		Ghi_D08G13941.gene	0.920288	0.779576		Ghi_D09G05206.gene	-2.37357	6.83902716521e-27
Ghi_A10G00181.gene	0.351492	0.121099		Ghi_A10G00181.gene	0.746236	0.000607366045644		Ghi_D09G04001.gene	-2.37293	2.51067971608e-09
Ghi_D11G00406.gene	0.667623	2.43772486589e-09		Ghi_D11G00406.gene	-0.24594	0.0504291780532		Ghi_A10G08776.gene	-2.37257	1.34237567138e-16
Ghi_A10G00186.gene	0.268459	0.304222		Ghi_A10G00186.gene	-0.161305	0.565637		Ghi_A03G04006.gene	-2.37152	9.36275266371e-08
Ghi_A08G05621.gene	1.08517	6.7875713447e-11		Ghi_A08G05621.gene	0.290101	0.0245150317958		Ghi_D11G18216.gene	-2.37138	1.96550336016e-20
Ghi_A09G11446.gene	0.167657	0.322625		Ghi_A09G11446.gene	0.0325440137348	0.850179		Ghi_D05G07796.gene	-2.37049	4.70943094333e-52
Ghi_D13G07951.gene	-1.22703	4.07374157207e-14		Ghi_D13G07951.gene	-0.704563	1.63266150509e-06		Ghi_A04G05491.gene	-2.36663	0.000361124914084
Ghi_D06G10846.gene	0	1		Ghi_D06G10846.gene	0	1		Ghi_D09G01731.gene	-2.36378	0.158855
Ghi_A08G01106.gene	-0.695723	1.60005474245e-08		Ghi_A08G01106.gene	-0.0285663	0.803359		Ghi_A12G02796.gene	-2.35461	0.152761
Ghi_A05G17826.gene	-0.90093	0.825256		Ghi_A05G17826.gene	-0.9408	0.817655		Ghi_D05G13876.gene	-2.35328	0.0041547517714
Ghi_A13G04866.gene	0	1		Ghi_A13G04866.gene	0	1		Ghi_A01G00426.gene	-2.35094	2.8744572971e-14
Ghi_A04G06036.gene	0.211278	0.47015		Ghi_A04G06036.gene	-0.0914179	0.772127		Ghi_A03G10221.gene	-2.35051	1.80623138477e-07
Ghi_A11G07126.gene	0	1		Ghi_A11G07126.gene	0	1		Ghi_D10G12086.gene	-2.34704	0.00375613813395
Ghi_D04G07611.gene	0	1		Ghi_D04G07611.gene	0	1		Ghi_A05G02486.gene	-2.34369	0.164429
Ghi_A09G04286.gene	4.38577	0.0254036047071		Ghi_A09G04286.gene	0.982753	0.809677		Ghi_D04G09281.gene	-2.34282	0.0482095755763
Ghi_D08G11541.gene	-0.41275	3.53999031936e-05		Ghi_D08G11541.gene	-0.126228	0.181053		Ghi_A07G06326.gene	-2.34257	0.00965658628707
Ghi_A11G07121.gene	0.321937	0.541254		Ghi_A11G07121.gene	-1.43131	0.0184151260901		Ghi_D07G07866.gene	-2.34235	0.151618
Ghi_D11G16226.gene	-1.86463	0.128145		Ghi_D11G16226.gene	-3.20725	0.0366659770456		Ghi_A03G03366.gene	-2.34172	0.148663
Ghi_D06G00636.gene	0	1		Ghi_D06G00636.gene	0	1		Ghi_A13G00001.gene	-2.33808	0.154728
Ghi_A02G06291.gene	0	1		Ghi_A02G06291.gene	0	1		Ghi_D02G09616.gene	-2.33767	0.0563973438163
Ghi_D02G07231.gene	-3.77904	0.0891006482542		Ghi_D02G07231.gene	0.0317601507351	0.982206		Ghi_D01G03091.gene	-2.33357	3.44578798074e-12
Ghi_D11G16221.gene	-0.430879	0.00837917629457		Ghi_D11G16221.gene	-0.304175	0.0604934922231		Ghi_A08G07331.gene	-2.33226	0.165308
Ghi_A09G14076.gene	-0.45277	0.000542014269349		Ghi_A09G14076.gene	-0.210666	0.120816		Ghi_A11G02581.gene	-2.33074	0.165031
Ghi_D04G03761.gene	0.156315	0.140388		Ghi_D04G03761.gene	-0.102184	0.323043		Ghi_D12G00516.gene	-2.33054	4.07690757924e-07
Ghi_D04G03766.gene	4.45657	0.00500832908576		Ghi_D04G03766.gene	2.49703	0.235498		Ghi_D12G11926.gene	-2.32932	3.52382174981e-05
Ghi_A09G14071.gene	0.661362	0.71065		Ghi_A09G14071.gene	-2.8176	0.330431		Ghi_D03G08641.gene	-2.32892	0.0970937428252
Ghi_A13G10811.gene	-0.565405	2.74875323312e-06		Ghi_A13G10811.gene	-0.326102	0.00140087286918		Ghi_A04G06101.gene	-2.32811	0.0418004056891
Ghi_D05G09261.gene	-2.40948	6.76854733263e-18		Ghi_D05G09261.gene	-0.450426	0.0257510354673		Ghi_A13G03451.gene	-2.32789	5.46898315748e-12
Ghi_D10G08931.gene	-1.46753	0.0239623131904		Ghi_D10G08931.gene	-0.672041	0.258221		Ghi_A09G08316.gene	-2.32666	0.0292427791678
Ghi_A13G12656.gene	-2.28148	5.56137021236e-19		Ghi_A13G12656.gene	-1.08579	1.01807339801e-06		Ghi_A13G12511.gene	-2.32661	1.00197656705e-45
Ghi_A13G12651.gene	0	1		Ghi_A13G12651.gene	0.982753	0.809677		Ghi_D01G08111.gene	-2.3256	0.0469262546008
Ghi_D10G08936.gene	0	1		Ghi_D10G08936.gene	0	1		Ghi_A13G08481.gene	-2.32312	3.88775154373e-12
Ghi_D02G07236.gene	0	1		Ghi_D02G07236.gene	0	1		Ghi_A06G02281.gene	-2.32128	0.00244197336689
Ghi_A04G02736.gene	0	1		Ghi_A04G02736.gene	0	1		Ghi_D02G01241.gene	-2.32055	2.10945059247e-08
Ghi_A13G07781.gene	0	1		Ghi_A13G07781.gene	0	1		Ghi_D05G02571.gene	-2.32041	5.73541528889e-08
Ghi_D02G12246.gene	0.210697	0.240332		Ghi_D02G12246.gene	0.142896	0.439092		Ghi_D10G09746.gene	-2.31937	4.79651127045e-41
Ghi_A05G17721.gene	0	1		Ghi_A05G17721.gene	0	1		Ghi_A05G14071.gene	-2.31727	0.152371
Ghi_D02G12241.gene	0.0902989952828	0.423702		Ghi_D02G12241.gene	-0.0156988	0.881958		Ghi_A10G02256.gene	-2.31441	0.00411435782554
Ghi_A13G07786.gene	0	1		Ghi_A13G07786.gene	0	1		Ghi_A07G05191.gene	-2.31334	0.0863109711709
Ghi_A04G02731.gene	0	1		Ghi_A04G02731.gene	0	1		Ghi_D08G06281.gene	-2.3084	0.00306417268853
Ghi_D02G09961.gene	-0.0241942	0.925347		Ghi_D02G09961.gene	-0.189948	0.480417		Ghi_A13G05746.gene	-2.3072	0.19473
Ghi_D05G07851.gene	-1.25366	2.53185201171e-15		Ghi_D05G07851.gene	0.277582	0.0572316040837		Ghi_D12G15851.gene	-2.30606	2.88170098009e-15
Ghi_D12G01256.gene	0	1		Ghi_D12G01256.gene	0	1		Ghi_D10G12461.gene	-2.30094	1.71567409655e-05
Ghi_D12G01251.gene	0	1		Ghi_D12G01251.gene	0	1		Ghi_A06G03906.gene	-2.29614	6.61422967917e-06
Ghi_D05G07856.gene	0	1		Ghi_D05G07856.gene	0	1		Ghi_A02G00146.gene	-2.29376	4.92387219164e-05
Ghi_D02G09966.gene	-0.564878	0.00018699654019		Ghi_D02G09966.gene	-0.263403	0.0447026924685		Ghi_A09G15446.gene	-2.29264	5.2165688915e-15
Ghi_A03G06296.gene	-0.324907	0.0523295834041		Ghi_A03G06296.gene	-0.075284	0.615879		Ghi_D12G00996.gene	-2.29234	2.13046939127e-05
Ghi_A13G10816.gene	1.69438	3.97744312584e-18		Ghi_A13G10816.gene	0.198194	0.385905		Ghi_D07G04086.gene	-2.29176	4.62765687462e-05
Ghi_D13G07636.gene	0	1		Ghi_D13G07636.gene	0	1		Ghi_A09G10551.gene	-2.28946	0.187874
Ghi_D02G03536.gene	-2.82621	1.62049991603e-13		Ghi_D02G03536.gene	-1.46442	1.36458417123e-06		Ghi_A12G14886.gene	-2.28754	9.63623475199e-86
Ghi_D06G05181.gene	1.02262	0.802113		Ghi_D06G05181.gene	0	1		Ghi_D11G16316.gene	-2.28481	0.0010423102281
Ghi_A05G16516.gene	-0.722476	4.01085066888e-05		Ghi_A05G16516.gene	-0.334195	0.0426375804135		Ghi_A10G00941.gene	-2.27038	0.117115
Ghi_D13G04606.gene	0.789649	0.00134704052077		Ghi_D13G04606.gene	0.689381	0.00504424759056		Ghi_D10G07786.gene	-2.26904	0.0075641532186
Ghi_D13G04601.gene	-0.499305	0.847209		Ghi_D13G04601.gene	-1.45327	0.624614		Ghi_A12G14891.gene	-2.26574	0.000172037006302
Ghi_A05G16511.gene	-2.94398	0.0184056002977		Ghi_A05G16511.gene	-0.483689	0.568932		Ghi_D05G04756.gene	-2.26383	2.54036638125e-27
Ghi_D12G04576.gene	0	1		Ghi_D12G04576.gene	0	1		Ghi_A03G11421.gene	-2.26238	0.326891
Ghi_A10G11266.gene	-0.120655	0.299166		Ghi_A10G11266.gene	0.155053	0.180296		Ghi_A04G07226.gene	-2.25735	9.68509193607e-06
Ghi_A06G07111.gene	-0.317398	0.700753		Ghi_A06G07111.gene	-1.20878	0.186672		Ghi_D08G11771.gene	-2.25735	4.93813372033e-11
Ghi_A10G11261.gene	0	1		Ghi_A10G11261.gene	0	1		Ghi_D09G11011.gene	-2.25696	4.13195269055e-08
Ghi_D02G03531.gene	0.323882	0.0472328100914		Ghi_D02G03531.gene	0.19516	0.256601		Ghi_D12G11346.gene	-2.25567	1.26643548399e-06
Ghi_A05G12206.gene	0	1		Ghi_A05G12206.gene	0	1		Ghi_A13G13731.gene	-2.25534	1.41754827068e-28
Ghi_D03G02216.gene	0	1		Ghi_D03G02216.gene	0	1		Ghi_D12G10816.gene	-2.25433	7.98064014446e-12
Ghi_A05G01911.gene	-0.480289	0.00171714007045		Ghi_A05G01911.gene	-0.175752	0.25485		Ghi_A05G09026.gene	-2.25384	0.322514
Ghi_D13G08111.gene	0	1		Ghi_D13G08111.gene	0	1		Ghi_A12G15541.gene	-2.25384	0.322514
Ghi_D03G02211.gene	0	1		Ghi_D03G02211.gene	0	1		Ghi_A12G13656.gene	-2.25309	0.329689
Ghi_A05G12201.gene	-3.67954	0.00070672595799		Ghi_A05G12201.gene	0.424604	0.436141		Ghi_D02G02506.gene	-2.25309	0.329689
Ghi_A04G06926.gene	3.42973	0.00102744832836		Ghi_A04G06926.gene	0.355907	0.83726		Ghi_D13G00616.gene	-2.25086	0.456735
Ghi_A03G06291.gene	0	1		Ghi_A03G06291.gene	0	1		Ghi_D02G11116.gene	-2.24913	0.100534
Ghi_D02G01426.gene	0.721098	0.000761615818813		Ghi_D02G01426.gene	0.367823	0.0899180421533		Ghi_A03G07436.gene	-2.24792	0.000192221891092
Ghi_A04G06921.gene	0	1		Ghi_A04G06921.gene	0	1		Ghi_A05G03316.gene	-2.24634	6.72155247771e-06
Ghi_D05G01291.gene	-1.83304	3.61993199006e-07		Ghi_D05G01291.gene	-0.20546	0.45354		Ghi_D12G13376.gene	-2.24558	0.326081
Ghi_A02G06946.gene	0	1		Ghi_A02G06946.gene	0	1		Ghi_D01G00796.gene	-2.24556	0.325032
Ghi_A07G02311.gene	-0.829224	0.808127		Ghi_A07G02311.gene	-1.82976	0.650484		Ghi_A04G04266.gene	-2.24556	0.325032
Ghi_A07G02316.gene	1.02382	0.143614		Ghi_A07G02316.gene	0.696993	0.349744		Ghi_D09G10631.gene	-2.24556	0.325032
Ghi_A02G06941.gene	0	1		Ghi_A02G06941.gene	0	1		Ghi_A13G14336.gene	-2.24556	0.325032
Ghi_A02G09371.gene	0.569181	0.0202800770155		Ghi_A02G09371.gene	0.274651	0.164625		Ghi_A13G09986.gene	-2.24402	0.302751
Ghi_D09G06081.gene	0.376892	0.00223179425361		Ghi_D09G06081.gene	0.0565837496807	0.668211		Ghi_D01G09961.gene	-2.24399	0.3018
Ghi_A08G14926.gene	0.372038	0.321184		Ghi_A08G14926.gene	-0.210299	0.583192		Ghi_D06G07011.gene	-2.24399	0.3018
Ghi_A08G14921.gene	0.170838	0.543968		Ghi_A08G14921.gene	0.0846077777299	0.75842		Ghi_D10G10371.gene	-2.24337	2.29729239869e-26
Ghi_D09G06086.gene	0.481286	0.559092		Ghi_D09G06086.gene	-0.0547141	0.949686		Ghi_A03G10096.gene	-2.24302	4.58022516588e-07
Ghi_D03G08971.gene	0	1		Ghi_D03G08971.gene	0	1		Ghi_A03G01636.gene	-2.23976	1.32662076532e-10
Ghi_A10G12511.gene	0	1		Ghi_A10G12511.gene	0	1		Ghi_A05G05416.gene	-2.23731	0.33345
Ghi_A07G05321.gene	1.94189	0.613974		Ghi_A07G05321.gene	0	1		Ghi_A13G10646.gene	-2.23731	0.33345
Ghi_A07G05326.gene	0	1		Ghi_A07G05326.gene	0	1		Ghi_D12G15656.gene	-2.2373	0.333219
Ghi_A10G12516.gene	0	1		Ghi_A10G12516.gene	0	1		Ghi_D01G10766.gene	-2.23588	0.300952
Ghi_A08G03596.gene	1.60545	2.34073356202e-14		Ghi_A08G03596.gene	0.233346	0.375485		Ghi_D08G05596.gene	-2.23588	0.300952
Ghi_D06G10126.gene	0.528704	0.652631		Ghi_D06G10126.gene	-0.65743	0.64121		Ghi_A08G04546.gene	-2.23587	0.299988
Ghi_D07G00016.gene	0	1		Ghi_D07G00016.gene	0	1		Ghi_D07G09396.gene	-2.23587	0.299988
Ghi_D11G03321.gene	1.29463	0.179206		Ghi_D11G03321.gene	-0.83404	0.592537		Ghi_A08G10581.gene	-2.23525	0.328149
Ghi_A06G11361.gene	-1.69559	1.76235265594e-07		Ghi_A06G11361.gene	-0.540429	0.0391672483931		Ghi_A03G13401.gene	-2.23525	0.327915
Ghi_D05G09486.gene	-0.233743	0.0487955422812		Ghi_D05G09486.gene	0.251263	0.0280983627792		Ghi_A10G10326.gene	-2.2326	4.0820839775e-05
Ghi_D05G09481.gene	0.450659	0.000473731160572		Ghi_D05G09481.gene	-0.497435	0.000288055437561		Ghi_A02G01546.gene	-2.22982	1.17863752434e-09
Ghi_A06G03361.gene	0	1		Ghi_A06G03361.gene	0	1		Ghi_A03G10231.gene	-2.22894	0.36956
Ghi_A05G02466.gene	-3.20025	1.21857665885e-12		Ghi_A05G02466.gene	-1.46455	0.000238789247475		Ghi_A11G01611.gene	-2.22894	0.36956
Ghi_A03G06141.gene	0	1		Ghi_A03G06141.gene	0	1		Ghi_A05G13956.gene	-2.22837	0.0350427231598
Ghi_A05G02461.gene	1.03073	6.63883484283e-15		Ghi_A05G02461.gene	0.236867	0.0904565		Ghi_D05G07961.gene	-2.22783	0.307621
Ghi_A06G12151.gene	1.02262	0.802113		Ghi_A06G12151.gene	0	1		Ghi_A13G12456.gene	-2.22783	0.306435
Ghi_D13G13171.gene	0.390856	0.227478		Ghi_D13G13171.gene	0.0894636438615	0.79049		Ghi_D11G10696.gene	-2.22783	0.306435
Ghi_D06G02376.gene	0	1		Ghi_D06G02376.gene	0	1		Ghi_D07G09841.gene	-2.22783	0.306435
Ghi_D06G02371.gene	-0.641861	0.00980022241463		Ghi_D06G02371.gene	-0.450125	0.0637932706075		Ghi_A12G10116.gene	-2.22709	1.18837145476e-05
Ghi_A12G11106.gene	1.02362	2.84261802074e-06		Ghi_A12G11106.gene	0.371453	0.119804		Ghi_A04G02341.gene	-2.22684	0.303667
Ghi_A06G12156.gene	0.476363	0.000685901580372		Ghi_A06G12156.gene	0.39169	0.00403445759199		Ghi_A05G05791.gene	-2.22684	0.302691
Ghi_A09G15306.gene	0	1		Ghi_A09G15306.gene	0	1		Ghi_D10G10996.gene	-2.22684	0.302691
Ghi_A13G09431.gene	-1.04071	0.0312433724211		Ghi_A13G09431.gene	-0.707857	0.105581		Ghi_D10G02436.gene	-2.22684	0.302691
Ghi_D04G02491.gene	-0.56824	0.0252832926892		Ghi_D04G02491.gene	-0.365465	0.13374		Ghi_D11G11241.gene	-2.22684	0.302475
Ghi_D04G02496.gene	0.155378	0.282445		Ghi_D04G02496.gene	-0.0669548	0.651647		Ghi_D09G05216.gene	-2.22677	9.14329827698e-06
Ghi_A13G09436.gene	-0.842074	2.17750237667e-15		Ghi_A13G09436.gene	-0.332211	0.00203712574565		Ghi_D04G02691.gene	-2.22571	3.38088214541e-11
Ghi_A09G15301.gene	0	1		Ghi_A09G15301.gene	0	1		Ghi_D08G00776.gene	-2.22042	0.0127802180111
Ghi_D04G01611.gene	0.614565	1.54148553691e-11		Ghi_D04G01611.gene	0.115981	0.232239		Ghi_A13G02846.gene	-2.21941	0.338669
Ghi_A10G02061.gene	2.65499	0.0971585880763		Ghi_A10G02061.gene	-0.889055	0.768817		Ghi_D06G07896.gene	-2.21875	0.304921
Ghi_A13G13241.gene	0.789816	4.236548878e-07		Ghi_A13G13241.gene	-0.118249	0.502879		Ghi_D12G13336.gene	-2.21875	0.304921
Ghi_A12G11101.gene	-1.42715	0.605445		Ghi_A12G11101.gene	2.74462	0.0419254790134		Ghi_A09G09126.gene	-2.21875	0.305138
Ghi_D09G07021.gene	0.0786379448097	0.595745		Ghi_D09G07021.gene	-0.137557	0.363833		Ghi_A09G00991.gene	-2.21874	0.306125
Ghi_D03G04071.gene	-0.741807	0.344765		Ghi_D03G04071.gene	-0.384224	0.607746		Ghi_D02G09581.gene	-2.21874	0.306125
Ghi_D09G00031.gene	0	1		Ghi_D09G00031.gene	0.982753	0.809677		Ghi_D06G01281.gene	-2.21874	0.306125
Ghi_A03G06146.gene	0.0608423	0.987792		Ghi_A03G06146.gene	-0.9408	0.817655		Ghi_D02G09661.gene	-2.21852	0.0448854722721
Ghi_D09G00036.gene	-0.331996	0.00736663007625		Ghi_D09G00036.gene	0.176619	0.122144		Ghi_A06G01441.gene	-2.21852	0.233856
Ghi_D09G07026.gene	-0.825111	5.83321972068e-13		Ghi_D09G07026.gene	-0.330555	0.00299395968656		Ghi_D02G04766.gene	-2.21746	0.333362
Ghi_D12G13461.gene	0	1		Ghi_D12G13461.gene	0	1		Ghi_A01G10921.gene	-2.21746	0.333362
Ghi_A07G10371.gene	0.81789	1.24982550278e-07		Ghi_A07G10371.gene	0.239756	0.147756		Ghi_D11G10936.gene	-2.21746	0.333362
Ghi_D12G13466.gene	-0.723158	0.00467143852816		Ghi_D12G13466.gene	-0.24557	0.300833		Ghi_D05G00736.gene	-2.21745	0.333601
Ghi_A09G12821.gene	-0.261903	0.138297		Ghi_A09G12821.gene	0.0621999397335	0.67884		Ghi_D13G03521.gene	-2.21745	0.333601
Ghi_A09G12826.gene	-0.256097	0.20529		Ghi_A09G12826.gene	0.168792	0.359998		Ghi_A13G13476.gene	-2.21744	0.334685
Ghi_D13G00841.gene	0.726995	0.0218893824046		Ghi_D13G00841.gene	-0.204718	0.470464		Ghi_D09G01866.gene	-2.216	0.0858976192708
Ghi_A11G08346.gene	0.297192	0.342194		Ghi_A11G08346.gene	-0.12682	0.701434		Ghi_A02G01191.gene	-2.21579	1.35211488237e-06
Ghi_A11G08341.gene	-0.0809589	0.447467		Ghi_A11G08341.gene	0.0181171	0.880553		Ghi_A07G11956.gene	-2.21483	4.78729434179e-14
Ghi_D12G01926.gene	0	1		Ghi_D12G01926.gene	0	1		Ghi_D05G09141.gene	-2.21128	0.0070348241498
Ghi_D04G02141.gene	0	1		Ghi_D04G02141.gene	0	1		Ghi_D03G09101.gene	-2.2095	0.313154
Ghi_D10G10741.gene	-2.31138	1.61824380191e-12		Ghi_D10G10741.gene	0.618187	0.00105345646501		Ghi_A07G07891.gene	-2.20668	0.196432
Ghi_D10G10746.gene	-0.0135357	0.933494		Ghi_D10G10746.gene	0.0807283754026	0.627467		Ghi_A13G02216.gene	-2.20568	0.0228612439292
Ghi_D04G02146.gene	-1.15096	1.81444977413e-08		Ghi_D04G02146.gene	-0.439323	0.0147604013701		Ghi_A10G02281.gene	-2.20334	0.00154421420236
Ghi_D12G01921.gene	-0.798788	0.210641		Ghi_D12G01921.gene	-0.781202	0.186648		Ghi_D05G10836.gene	-2.20283	0.0376137642841
Ghi_D03G03166.gene	0.0608420038673	0.987615		Ghi_D03G03166.gene	-0.9408	0.817655		Ghi_D06G10686.gene	-2.20047	0.338856
Ghi_D07G10431.gene	0	1		Ghi_D07G10431.gene	0	1		Ghi_D09G08171.gene	-2.19928	0.344819
Ghi_D09G10931.gene	-0.883605	0.1447		Ghi_D09G10931.gene	0.107043	0.833912		Ghi_A07G03751.gene	-2.19928	0.344819
Ghi_D09G10936.gene	-0.386237	0.0163106103919		Ghi_D09G10936.gene	-0.197573	0.180248		Ghi_A09G07241.gene	-2.19443	2.05656934921e-05
Ghi_D07G10436.gene	0.627997	1.35785744266e-05		Ghi_D07G10436.gene	0.117947	0.395126		Ghi_A12G15721.gene	-2.1927	0.213372
Ghi_D03G03161.gene	0.651614	0.0185691		Ghi_D03G03161.gene	0.265705	0.377212		Ghi_D13G10291.gene	-2.19076	0.210323
Ghi_D07G06356.gene	-0.865459	0.14023		Ghi_D07G06356.gene	0.227266	0.643147		Ghi_A05G18196.gene	-2.19066	0.347487
Ghi_D11G12836.gene	0	1		Ghi_D11G12836.gene	0	1		Ghi_A08G13046.gene	-2.18883	0.0201837400751
Ghi_A05G14916.gene	0.977567	0.746468		Ghi_A05G14916.gene	0.0209820752121	0.995585		Ghi_A06G09466.gene	-2.18734	0.189826
Ghi_A05G14911.gene	0	1		Ghi_A05G14911.gene	0	1		Ghi_A11G18041.gene	-2.18108	4.16112866043e-07
Ghi_D11G12831.gene	-1.59551	7.06779883577e-29		Ghi_D11G12831.gene	-0.474888	9.25390992941e-05		Ghi_A12G13676.gene	-2.18029	0.0722159168849
Ghi_D07G06351.gene	-0.290148	0.0383536579748		Ghi_D07G06351.gene	-0.0968227	0.472873		Ghi_D03G09041.gene	-2.17931	0.384581
Ghi_D10G12451.gene	2.92958	7.09069860695e-07		Ghi_D10G12451.gene	-1.46518	0.255907		Ghi_D09G10516.gene	-2.1793	0.384841
Ghi_A13G14166.gene	-0.320784	0.704043		Ghi_A13G14166.gene	-0.529833	0.537022		Ghi_D09G07346.gene	-2.17921	0.208023
Ghi_A13G14161.gene	-1.63844	8.00045751475e-07		Ghi_A13G14161.gene	-0.603281	0.0175639782646		Ghi_A11G02441.gene	-2.17874	3.38613978945e-07
Ghi_D10G12456.gene	-0.0106405	0.960673		Ghi_D10G12456.gene	-0.172687	0.419008		Ghi_D07G02796.gene	-2.1772	2.26972711565e-08
Ghi_A13G04396.gene	0	1		Ghi_A13G04396.gene	0	1		Ghi_A10G09161.gene	-2.17664	0.205966
Ghi_A04G00806.gene	-0.730887	0.142778		Ghi_A04G00806.gene	-0.592358	0.21659		Ghi_A07G00421.gene	-2.17493	3.67534666066e-06
Ghi_D02G02481.gene	2.48946	0.454748		Ghi_D02G02481.gene	2.4742	0.439451		Ghi_A13G13226.gene	-2.17295	0.201032
Ghi_A04G00801.gene	0	1		Ghi_A04G00801.gene	0	1		Ghi_A05G18621.gene	-2.17025	0.000533559301102
Ghi_A09G11556.gene	1.03543	2.98758893524e-05		Ghi_A09G11556.gene	0.109819	0.696575		Ghi_A11G18576.gene	-2.16914	0.190813
Ghi_A10G13641.gene	0.943283	1.82350814712e-12		Ghi_A10G13641.gene	0.77225	1.1605370267e-06		Ghi_A12G01796.gene	-2.16693	4.03497073209e-38
Ghi_A10G13646.gene	0.716885	0.000202238809361		Ghi_A10G13646.gene	0.336378	0.103907		Ghi_A12G15391.gene	-2.16473	0.0800055530861
Ghi_A09G11551.gene	0	1		Ghi_A09G11551.gene	0	1		Ghi_A02G08321.gene	-2.16315	7.87173771303e-08
Ghi_A13G00006.gene	0.842999	1.09159410465e-06		Ghi_A13G00006.gene	0.365919	0.0536300098804		Ghi_D02G07296.gene	-2.16049	0.00112191090307
Ghi_A12G00251.gene	-0.301642	0.135777		Ghi_A12G00251.gene	-0.184324	0.35819		Ghi_A04G06631.gene	-2.15812	5.12147179169e-11
Ghi_A12G00256.gene	-0.755592	0.512904		Ghi_A12G00256.gene	-0.339009	0.759466		Ghi_D03G02096.gene	-2.15717	1.43674994039e-06
Ghi_D02G02486.gene	0	1		Ghi_D02G02486.gene	0	1		Ghi_A07G02291.gene	-2.15466	0.202967
Ghi_D13G00846.gene	-0.143482	0.586103		Ghi_D13G00846.gene	-0.143005	0.592211		Ghi_A12G07681.gene	-2.15274	3.32667256195e-06
Ghi_A05G05116.gene	0.119011	0.859728		Ghi_A05G05116.gene	0.627161	0.297257		Ghi_A05G08331.gene	-2.14911	0.136869
Ghi_D07G00116.gene	0.0870905887252	0.671292		Ghi_D07G00116.gene	0.139218	0.470933		Ghi_A12G14896.gene	-2.1489	4.6169564959e-82
Ghi_A08G11836.gene	0	1		Ghi_A08G11836.gene	0	1		Ghi_D05G02901.gene	-2.14807	0.128101
Ghi_A08G11831.gene	0	1		Ghi_A08G11831.gene	0	1		Ghi_A05G03506.gene	-2.14497	0.221834
Ghi_A05G05111.gene	0.771349	3.71667887646e-05		Ghi_A05G05111.gene	0.197502	0.358486		Ghi_A11G06966.gene	-2.142	2.23061136824e-43
Ghi_A07G01151.gene	0	1		Ghi_A07G01151.gene	0	1		Ghi_D07G08386.gene	-2.14128	0.0355685266061
Ghi_D12G14606.gene	-1.57415	0.00795624391089		Ghi_D12G14606.gene	0.212255	0.617149		Ghi_D03G02091.gene	-2.13254	0.127049
Ghi_D12G14601.gene	-0.614145	0.000275135800765		Ghi_D12G14601.gene	-0.374188	0.0225351405276		Ghi_A12G12186.gene	-2.13047	0.00317077274957
Ghi_A07G01156.gene	0.0988381993256	0.585914		Ghi_A07G01156.gene	-0.0753789	0.668907		Ghi_D01G00831.gene	-2.12642	1.48493641191e-08
Ghi_A12G13406.gene	-1.82819	3.02031395204e-27		Ghi_A12G13406.gene	-0.981009	3.25456322861e-12		Ghi_D01G09221.gene	-2.12597	8.49468753695e-07
Ghi_A07G00201.gene	1.12911	2.17408093773e-08		Ghi_A07G00201.gene	0.246557	0.280849		Ghi_A12G08956.gene	-2.12176	0.00453315217823
Ghi_A06G08731.gene	-3.68296	2.76778392172e-76		Ghi_A06G08731.gene	-0.56895	2.98185879088e-05		Ghi_D05G03461.gene	-2.12152	5.5437111745e-14
Ghi_A06G08736.gene	0.103587	0.887829		Ghi_A06G08736.gene	-0.281345	0.712192		Ghi_A05G23161.gene	-2.11803	4.03239928262e-20
Ghi_A07G00206.gene	-0.231276	0.140452		Ghi_A07G00206.gene	-0.161711	0.307218		Ghi_D05G08526.gene	-2.11761	1.89338410924e-11
Ghi_A12G13401.gene	-7.70793	1.2950766127e-12		Ghi_A12G13401.gene	-1.8017	1.52295040997e-07		Ghi_D02G12661.gene	-2.11641	0.000748145196851
Ghi_A05G10111.gene	0	1		Ghi_A05G10111.gene	0	1		Ghi_D06G10831.gene	-2.11638	0.145209
Ghi_A05G22376.gene	-0.852505	0.0134630336833		Ghi_A05G22376.gene	-0.0765984	0.80816		Ghi_A06G09081.gene	-2.11493	3.46050679909e-15
Ghi_A05G10116.gene	0	1		Ghi_A05G10116.gene	0	1		Ghi_D13G13626.gene	-2.11385	2.33150222042e-34
Ghi_D09G09516.gene	-0.0870676	0.676137		Ghi_D09G09516.gene	-0.192522	0.359339		Ghi_A11G01216.gene	-2.11363	0.0200963912036
Ghi_D12G12731.gene	-2.4373	6.24333776745e-06		Ghi_D12G12731.gene	-0.505089	0.235986		Ghi_D03G04216.gene	-2.11333	0.133261
Ghi_A02G03231.gene	0.140965	0.415727		Ghi_A02G03231.gene	-0.0857364	0.624864		Ghi_D04G00071.gene	-2.11258	0.0196400435636
Ghi_A02G03236.gene	0	1		Ghi_A02G03236.gene	0	1		Ghi_A10G05416.gene	-2.11092	0.0847363659187
Ghi_D12G12736.gene	-0.367799	0.00716394016784		Ghi_D12G12736.gene	0.361386	0.0053673536818		Ghi_A12G04306.gene	-2.11005	0.151311
Ghi_D09G09511.gene	-0.307561	0.0119325240578		Ghi_D09G09511.gene	-0.377008	0.000524246024003		Ghi_D10G10256.gene	-2.11	1.33252431332e-14
Ghi_A02G08251.gene	0.335161	0.000852036037425		Ghi_A02G08251.gene	0.264077	0.00931498924603		Ghi_A12G14031.gene	-2.10849	4.31240890702e-09
Ghi_D06G11071.gene	-0.467178	0.0479473		Ghi_D06G11071.gene	-0.464289	0.0578564419623		Ghi_A03G01206.gene	-2.10766	6.2644242153e-12
Ghi_D12G06326.gene	0.369909	0.0819260714272		Ghi_D12G06326.gene	0.0827888874434	0.694001		Ghi_A08G12491.gene	-2.10745	9.5797771457e-20
Ghi_D12G06321.gene	-0.0887593	0.741129		Ghi_D12G06321.gene	-0.32443	0.191485		Ghi_A04G02316.gene	-2.10737	9.03989813945e-06
Ghi_A11G09436.gene	0.516158	0.0402601258821		Ghi_A11G09436.gene	-0.237851	0.385508		Ghi_D02G02466.gene	-2.10697	0.0983756054421
Ghi_D05G04551.gene	-1.03217	0.359373		Ghi_D05G04551.gene	-1.07347	0.341389		Ghi_A01G00711.gene	-2.10557	5.06715112733e-18
Ghi_A11G09431.gene	0.437236	0.309798		Ghi_A11G09431.gene	0.695804	0.0654424735239		Ghi_D11G18036.gene	-2.10273	0.0423555003802
GhiUnG00001.gene	0	1		GhiUnG00001.gene	0	1		Ghi_A10G00341.gene	-2.09827	2.21685043029e-47
Ghi_A08G11781.gene	0.0221118337478	0.916561		Ghi_A08G11781.gene	-0.0493978	0.806519		Ghi_D12G10306.gene	-2.09678	7.08538611342e-08
Ghi_D01G08916.gene	0.379599	0.823094		Ghi_D01G08916.gene	1.47096	0.295017		Ghi_A09G04236.gene	-2.09661	0.00803643662308
Ghi_A08G11786.gene	-0.782294	1.29225053915e-09		Ghi_A08G11786.gene	-0.396749	0.00144240119818		Ghi_A05G13961.gene	-2.09647	0.0171923964289
GhiUnG00006.gene	0	1		GhiUnG00006.gene	0	1		Ghi_D05G07976.gene	-2.09626	1.8218191483e-39
Ghi_D08G03896.gene	0	1		Ghi_D08G03896.gene	0	1		Ghi_A10G13811.gene	-2.09602	2.38278785265e-07
Ghi_D02G08786.gene	-1.46354	7.95980747771e-06		Ghi_D02G08786.gene	-0.0343632	0.887547		Ghi_D03G10051.gene	-2.09569	0.0258965860078
Ghi_A12G00876.gene	1.36896	1.00484025384e-14		Ghi_A12G00876.gene	0.455437	0.0230195201292		Ghi_D05G05481.gene	-2.09336	0.0784493223066
Ghi_D09G01071.gene	0	1		Ghi_D09G01071.gene	0	1		Ghi_D05G10241.gene	-2.0913	0.000419134069177
Ghi_A02G08256.gene	-0.0893008	0.487672		Ghi_A02G08256.gene	0.259429	0.0261698150957		Ghi_A02G00846.gene	-2.09052	0.0522020915785
Ghi_D05G00996.gene	-0.671791	0.00190420623158		Ghi_D05G00996.gene	-0.337794	0.0839136978964		Ghi_A13G11976.gene	-2.08536	6.6172466929e-07
Ghi_D09G01076.gene	0	1		Ghi_D09G01076.gene	0	1		Ghi_D08G04911.gene	-2.08513	9.91036655938e-37
Ghi_A12G00871.gene	0.984918	3.81859114834e-22		Ghi_A12G00871.gene	0.141729	0.174051		Ghi_A12G08561.gene	-2.08428	0.0759402749954
Ghi_A11G05191.gene	0	1		Ghi_A11G05191.gene	0	1		Ghi_D08G10991.gene	-2.08275	0.00650566299748
Ghi_D10G11901.gene	0.176771	0.145489		Ghi_D10G11901.gene	-0.397105	0.00206776497336		Ghi_D13G10101.gene	-2.08248	4.58810577378e-22
Ghi_A03G07191.gene	-1.77939	0.652976		Ghi_A03G07191.gene	0.0221785609631	0.99357		Ghi_D13G05621.gene	-2.08038	0.0649232773056
Ghi_A03G07196.gene	-1.8114	0.644096		Ghi_A03G07196.gene	-1.85245	0.623369		Ghi_D03G00646.gene	-2.07784	0.0320017233725
Ghi_D10G11906.gene	-0.0390986	0.795202		Ghi_D10G11906.gene	0.141854	0.335156		Ghi_D03G09606.gene	-2.07719	0.000164305868559
Ghi_D04G08776.gene	0	1		Ghi_D04G08776.gene	0.982753	0.809677		Ghi_A09G04686.gene	-2.07471	0.0353221205973
Ghi_A11G05196.gene	-0.11936	0.223632		Ghi_A11G05196.gene	0.165789	0.0881451945279		Ghi_D11G01916.gene	-2.06979	0.0617984048705
Ghi_A08G15201.gene	1.82094	0.00507483427945		Ghi_A08G15201.gene	-0.0662924	0.942387		Ghi_A10G01831.gene	-2.06502	9.46615854714e-38
Ghi_A08G15206.gene	-1.57647	0.125008		Ghi_A08G15206.gene	-0.217538	0.796145		Ghi_D13G11461.gene	-2.06446	0.00216487697587
Ghi_A12G12836.gene	3.22262	0.0250699518176		Ghi_A12G12836.gene	1.0169	0.645563		Ghi_D04G09286.gene	-2.06439	5.66694468312e-16
Ghi_D05G00991.gene	-1.35465	0.000680065951207		Ghi_D05G00991.gene	1.17793	5.37988935136e-06		Ghi_D11G14566.gene	-2.06343	0.0100306189371
Ghi_A13G01126.gene	0.838546	0.00980027745159		Ghi_A13G01126.gene	1.12445	0.000103584967292		Ghi_D10G06791.gene	-2.05936	2.06370605585e-12
Ghi_A12G06156.gene	-0.440643	0.551326		Ghi_A12G06156.gene	0.550633	0.387316		Ghi_A09G07001.gene	-2.05636	3.04962306279e-22
Ghi_A12G06151.gene	0	1		Ghi_A12G06151.gene	0	1		Ghi_A09G11986.gene	-2.0536	0.00288612039244
Ghi_A13G01121.gene	-0.530394	0.0262691358966		Ghi_A13G01121.gene	-0.361072	0.108792		Ghi_A04G01456.gene	-2.04576	0.00274898315014
Ghi_A03G06821.gene	0	1		Ghi_A03G06821.gene	0	1		Ghi_A09G13511.gene	-2.04294	0.252377
Ghi_A03G06826.gene	0.650962	2.12157724247e-05		Ghi_A03G06826.gene	0.77395	1.35940449907e-05		Ghi_D04G03251.gene	-2.04294	0.252377
Ghi_A11G07971.gene	1.83053	0.00136180967269		Ghi_A11G07971.gene	-0.373789	0.66		Ghi_D09G00086.gene	-2.04294	0.252377
Ghi_A11G07976.gene	-1.24202	0.128179		Ghi_A11G07976.gene	-0.0832856	0.907481		Ghi_D09G02891.gene	-2.03826	0.178789
Ghi_D03G09151.gene	4.05374	0.0144148		Ghi_D03G09151.gene	3.37611	0.0602934051907		Ghi_A13G13371.gene	-2.03797	0.00464425256068
Ghi_D03G04306.gene	0	1		Ghi_D03G04306.gene	0	1		Ghi_A05G09006.gene	-2.03766	0.251591
Ghi_A02G05996.gene	0.760569	0.000198393864131		Ghi_A02G05996.gene	0.163175	0.521576		Ghi_A08G00596.gene	-2.03766	0.251591
Ghi_A02G05991.gene	-0.134936	0.140583		Ghi_A02G05991.gene	-0.0423814	0.636394		Ghi_A12G08831.gene	-2.03766	0.251591
Ghi_D03G04301.gene	0	1		Ghi_D03G04301.gene	0	1		Ghi_D11G16286.gene	-2.03766	0.251591
Ghi_D03G09156.gene	-0.90093	0.825256		Ghi_D03G09156.gene	0.900465	0.784015		Ghi_D08G00056.gene	-2.03631	0.10447
Ghi_A10G10761.gene	0.339584	0.0108316476066		Ghi_A10G10761.gene	-0.295512	0.0263839200661		Ghi_D10G12296.gene	-2.03219	0.0535010646023
Ghi_D02G06181.gene	1.15925	0.152151		Ghi_D02G06181.gene	-1.35809	0.267379		Ghi_A13G06666.gene	-2.032	0.253262
Ghi_A10G10986.gene	-0.419997	0.00105547020124		Ghi_A10G10986.gene	-0.341136	0.00470083572565		Ghi_D06G01336.gene	-2.03177	0.0594551971373
Ghi_D06G10321.gene	-0.90093	0.825256		Ghi_D06G10321.gene	-0.9408	0.817655		Ghi_D05G09571.gene	-2.03161	2.0819458501e-05
Ghi_D05G14461.gene	2.85046	2.31287145669e-12		Ghi_D05G14461.gene	1.39728	0.00289464753232		Ghi_A05G11281.gene	-2.03078	3.8763410572e-38
Ghi_A03G07441.gene	1.54208	0.539772		Ghi_A03G07441.gene	-0.9408	0.817655		Ghi_D10G00911.gene	-2.02923	5.55305069747e-23
Ghi_A11G00616.gene	-0.145198	0.465656		Ghi_A11G00616.gene	-0.390789	0.0142165039711		Ghi_A04G02476.gene	-2.02744	0.106868
Ghi_A11G00611.gene	0.418907	0.454835		Ghi_A11G00611.gene	0.667047	0.177794		Ghi_A09G02236.gene	-2.02326	0.115911
Ghi_A13G02151.gene	-2.37454	0.481755		Ghi_A13G02151.gene	-0.571054	0.820369		Ghi_D08G10461.gene	-2.02157	0.238019
Ghi_A03G07446.gene	0.623442	0.00605230367945		Ghi_A03G07446.gene	0.301572	0.185124		Ghi_D05G07521.gene	-2.02042	0.00382027498037
Ghi_D05G14466.gene	0	1		Ghi_D05G14466.gene	0	1		Ghi_D13G09726.gene	-2.02032	0.1156
Ghi_D09G11686.gene	-0.578988	0.000179614106567		Ghi_D09G11686.gene	-0.155417	0.187895		Ghi_A12G08346.gene	-2.01971	7.16249889431e-25
Ghi_A02G01771.gene	0.75019	1.00814361673e-11		Ghi_A02G01771.gene	0.0653182142478	0.588549		Ghi_D10G03676.gene	-2.01802	0.245319
Ghi_A06G09066.gene	0.124206	0.872402		Ghi_A06G09066.gene	-0.198047	0.806614		Ghi_A02G00921.gene	-2.01769	1.3484784366e-06
Ghi_A06G09061.gene	-1.42984	0.000590372224768		Ghi_A06G09061.gene	-0.341626	0.336236		Ghi_A07G02676.gene	-2.01754	0.00173645201541
Ghi_D09G11681.gene	2.65216	0.00731840819436		Ghi_D09G11681.gene	0.0281736535515	0.986317		Ghi_D06G11281.gene	-2.0156	0.264106
Ghi_A12G10176.gene	-0.327585	0.283138		Ghi_A12G10176.gene	0.111022	0.689324		Ghi_A09G02561.gene	-2.01521	0.18476
Ghi_D13G08931.gene	0.0976917	0.452645		Ghi_D13G08931.gene	-0.48336	0.000167685494251		Ghi_A08G05281.gene	-2.01453	0.0323982649474
Ghi_D10G13461.gene	-1.3581	0.0202555993475		Ghi_D10G13461.gene	-0.289514	0.534413		Ghi_A12G09521.gene	-2.01426	0.156571
Ghi_D10G13466.gene	0.487579	0.000992691265131		Ghi_D10G13466.gene	0.397586	0.00843407449014		Ghi_D10G04041.gene	-2.01315	0.0498769924616
Ghi_D13G08936.gene	0.203073	0.341119		Ghi_D13G08936.gene	-0.539011	0.0143018652772		Ghi_A11G00621.gene	-2.01284	0.0185275734285
Ghi_A12G10171.gene	-0.90093	0.825256		Ghi_A12G10171.gene	-0.9408	0.817655		Ghi_A01G10536.gene	-2.01232	0.262443
Ghi_A07G08856.gene	0	1		Ghi_A07G08856.gene	0	1		Ghi_D03G05886.gene	-2.01232	0.262443
Ghi_A05G11241.gene	2.9459	5.83359447792e-08		Ghi_A05G11241.gene	1.67295	0.00580798415981		Ghi_D10G13256.gene	-2.01177	0.257759
Ghi_D11G09416.gene	-2.08125	0.0398828471051		Ghi_D11G09416.gene	-0.531767	0.513256		Ghi_A04G04641.gene	-2.01097	0.270295
Ghi_D11G09411.gene	0.00745525854477	0.973412		Ghi_D11G09411.gene	-0.163184	0.495713		Ghi_D05G11701.gene	-2.00933	0.145723
Ghi_A05G11246.gene	0.0970528576082	0.781125		Ghi_A05G11246.gene	-0.212099	0.561359		Ghi_D10G08536.gene	-2.00885	0.0465589401747
Ghi_A07G08851.gene	0	1		Ghi_A07G08851.gene	0	1		Ghi_D12G03906.gene	-2.00884	0.241723
Ghi_D09G06866.gene	-0.90093	0.825256		Ghi_D09G06866.gene	0.915365	0.762791		Ghi_D08G07276.gene	-2.00781	1.00581443868e-15
Ghi_A02G06391.gene	0	1		Ghi_A02G06391.gene	0	1		Ghi_A12G13806.gene	-2.00742	0.248412
Ghi_A13G02156.gene	-1.94057	0.0927102398488		Ghi_A13G02156.gene	-1.12832	0.242848		Ghi_A13G10796.gene	-2.00593	0.00856036406993
Ghi_D09G06861.gene	0	1		Ghi_D09G06861.gene	0	1		Ghi_D12G00781.gene	-2.0047	1.79349197248e-13
Ghi_A08G00461.gene	0	1		Ghi_A08G00461.gene	0	1		Ghi_D11G12371.gene	-2.00385	2.74209029879e-06
Ghi_D12G07496.gene	-1.71644	3.11637000934e-22		Ghi_D12G07496.gene	-0.278344	0.0724420259014		Ghi_A04G00406.gene	-2.00316	0.292697
Ghi_A12G11806.gene	0.729178	2.76730659084e-05		Ghi_A12G11806.gene	0.0909856	0.655421		Ghi_D01G10951.gene	-2.0023	0.0982296349531
Ghi_A12G11801.gene	-0.315839	0.0535902449125		Ghi_A12G11801.gene	-0.215835	0.156986		Ghi_D05G07776.gene	-2.00198	0.0989407716223
Ghi_D12G07491.gene	0.156657	0.141831		Ghi_D12G07491.gene	0.384206	0.000239808369616		Ghi_D02G06896.gene	-2.00156	1.83058560537e-52
Ghi_A08G00466.gene	-0.374174	0.324736		Ghi_A08G00466.gene	0.0496608754316	0.880641		Ghi_A05G06541.gene	-2.00093	0.0680045767709
Ghi_D11G16401.gene	0	1		Ghi_D11G16401.gene	0	1		GhiUnG00881.gene	-1.99995	0.582922
Ghi_A05G20326.gene	0	1		Ghi_A05G20326.gene	0	1		Ghi_A09G03271.gene	-1.99957	3.9309899852e-12
Ghi_A02G01776.gene	0	1		Ghi_A02G01776.gene	0	1		Ghi_D07G07261.gene	-1.99912	0.265552
Ghi_A05G20321.gene	-0.250343	0.0185822630174		Ghi_A05G20321.gene	-0.290552	0.00719440410253		Ghi_A01G08291.gene	-1.99894	0.244612
Ghi_A12G11646.gene	-4.59497	3.51297040937e-06		Ghi_A12G11646.gene	0.474919	0.214718		Ghi_A12G04926.gene	-1.99806	0.176222
Ghi_A02G03906.gene	0	1		Ghi_A02G03906.gene	0	1		Ghi_D12G15081.gene	-1.99802	0.163202
Ghi_D05G04556.gene	0.301866	0.181037		Ghi_D05G04556.gene	-0.0494314	0.841604		Ghi_D12G12941.gene	-1.99599	0.160374
Ghi_A02G03901.gene	0.000638106079664	0.9959		Ghi_A02G03901.gene	0.219898	0.0531402377064		Ghi_D11G04146.gene	-1.99417	9.05370258481e-09
Ghi_A02G06396.gene	0	1		Ghi_A02G06396.gene	0	1		Ghi_A01G09786.gene	-1.99343	8.20653080577e-20
GhiUnG00411.gene	0	1		GhiUnG00411.gene	0	1		Ghi_A11G01171.gene	-1.99237	0.213771
Ghi_A06G12976.gene	0.912938	0.789947		Ghi_A06G12976.gene	-0.9408	0.817655		Ghi_A06G00611.gene	-1.99113	0.0982810715954
Ghi_D03G00536.gene	-3.45086	5.13149485086e-74		Ghi_D03G00536.gene	-1.77366	9.82708626764e-31		GhiUnG01981.gene	-1.99004	0.179618
Ghi_D03G00531.gene	-1.29751	0.0286038391503		Ghi_D03G00531.gene	-0.177642	0.704946		Ghi_D06G06596.gene	-1.98933	3.68422195618e-15
Ghi_A06G12971.gene	0.527258	0.0275309778399		Ghi_A06G12971.gene	-0.165006	0.548561		Ghi_A03G03681.gene	-1.98743	0.117006
Ghi_D06G12631.gene	-4.2449	3.8798222758e-13		Ghi_D06G12631.gene	0.00978399313533	0.973379		Ghi_D12G07761.gene	-1.9871	0.00888031477363
Ghi_D01G09816.gene	-0.500426	0.831048		Ghi_D01G09816.gene	-1.45263	0.594517		Ghi_A02G06706.gene	-1.98498	0.133999
Ghi_A08G14556.gene	0.569972	0.00580667427982		Ghi_A08G14556.gene	0.3223	0.116498		Ghi_D10G01111.gene	-1.98342	1.6813316166e-38
Ghi_A08G14551.gene	-0.242604	0.120283		Ghi_A08G14551.gene	-0.438707	0.00594108237498		Ghi_D06G10411.gene	-1.98326	1.80147223946e-07
Ghi_D06G12636.gene	-0.305322	0.0288118		Ghi_D06G12636.gene	0.209751	0.119078		Ghi_D10G04861.gene	-1.9831	3.78542384068e-09
Ghi_D09G10481.gene	-1.27608	0.0343750119336		Ghi_D09G10481.gene	-2.09236	0.00209641018401		Ghi_D10G03411.gene	-1.98195	1.92642032908e-05
Ghi_A08G10071.gene	-0.110711	0.863957		Ghi_A08G10071.gene	-0.713488	0.363651		Ghi_D05G10766.gene	-1.98136	0.279629
Ghi_A08G10076.gene	0	1		Ghi_A08G10076.gene	0.982753	0.809677		Ghi_D06G07546.gene	-1.98078	0.089201
Ghi_D09G10486.gene	0.333917	0.0701745041352		Ghi_D09G10486.gene	0.0688859368216	0.679021		Ghi_A08G11156.gene	-1.98012	0.606432
Ghi_D09G05511.gene	-1.88204	6.6084213761e-05		Ghi_D09G05511.gene	-0.665234	0.0627326209974		Ghi_D05G12221.gene	-1.97952	0.20254
Ghi_D12G07141.gene	0.30364	0.00195144492605		Ghi_D12G07141.gene	-0.0865025	0.350877		Ghi_A12G13546.gene	-1.97902	0.295624
Ghi_D12G07146.gene	-2.64478	0.1961		Ghi_D12G07146.gene	-0.200801	0.89313		Ghi_A05G06116.gene	-1.97866	0.0478873927343
Ghi_D09G05516.gene	-0.339467	0.352504		Ghi_D09G05516.gene	-0.0891823	0.8012		Ghi_A02G03251.gene	-1.97855	1.23751347897e-10
Ghi_A01G05976.gene	1.65123	0.118138		Ghi_A01G05976.gene	0.915612	0.422285		Ghi_A11G04631.gene	-1.97733	0.296599
Ghi_A01G05971.gene	0.699266	0.00549351663618		Ghi_A01G05971.gene	-0.337412	0.254865		Ghi_D11G14871.gene	-1.97609	5.76789134119e-28
GhiUnG02331.gene	0	1		GhiUnG02331.gene	0	1		Ghi_A03G13166.gene	-1.97531	1.39515077574e-12
Ghi_D01G09811.gene	-0.750929	9.69414795054e-10		Ghi_D01G09811.gene	-0.281745	0.0314783253943		Ghi_D09G04641.gene	-1.97503	1.57336428784e-17
GhiUnG02336.gene	0	1		GhiUnG02336.gene	0	1		Ghi_D04G08966.gene	-1.97425	0.00118712909496
Ghi_A12G06841.gene	-0.700344	0.0263786392907		Ghi_A12G06841.gene	0.260542	0.380664		Ghi_D03G04431.gene	-1.96814	2.17441682712e-11
Ghi_A02G08651.gene	0.0995632688312	0.421162		Ghi_A02G08651.gene	-0.0626858	0.575888		Ghi_D07G04531.gene	-1.96135	8.51081671213e-08
Ghi_A13G12556.gene	0	1		Ghi_A13G12556.gene	0	1		Ghi_A03G12271.gene	-1.96098	0.0129084345646
Ghi_D04G02121.gene	-0.714861	0.000520861484008		Ghi_D04G02121.gene	-0.422218	0.0168456413438		Ghi_A05G12591.gene	-1.95412	0.0347847343418
Ghi_D10G07781.gene	1.02262	0.802113		Ghi_D10G07781.gene	0	1		Ghi_D06G01086.gene	-1.95317	4.55624526668e-21
Ghi_A03G01111.gene	-0.931973	0.705821		Ghi_A03G01111.gene	-1.86817	0.497863		Ghi_A12G11576.gene	-1.95163	9.04102482746e-71
Ghi_A11G06756.gene	0.944903	0.000366796022932		Ghi_A11G06756.gene	0.627628	0.0214385539864		Ghi_D10G01266.gene	-1.95136	0.0384846047908
Ghi_A03G02671.gene	-0.338077	0.505476		Ghi_A03G02671.gene	-0.311795	0.535029		Ghi_A12G15746.gene	-1.94967	0.456001
Ghi_A03G06311.gene	0	1		Ghi_A03G06311.gene	0	1		Ghi_D11G13321.gene	-1.94961	0.45474
Ghi_A12G15271.gene	0	1		Ghi_A12G15271.gene	0	1		GhiUnG01286.gene	-1.9496	0.454461
Ghi_A12G15276.gene	0	1		Ghi_A12G15276.gene	0	1		Ghi_A12G02451.gene	-1.9496	0.454461
Ghi_A03G06316.gene	-1.94153	0.287868		Ghi_A03G06316.gene	-0.170946	0.89337		Ghi_A07G03566.gene	-1.94924	4.00686059378e-07
Ghi_A03G02676.gene	0.0676634902294	0.749567		Ghi_A03G02676.gene	-0.127343	0.417507		Ghi_D08G11961.gene	-1.94595	2.97021732594e-27
Ghi_A11G06751.gene	1.56193	8.49791135578e-09		Ghi_A11G06751.gene	0.648225	0.0431956781306		Ghi_D02G08681.gene	-1.94514	0.0232442787019
Ghi_D09G10151.gene	0.443749	0.103605		Ghi_D09G10151.gene	0.0349703905969	0.902761		Ghi_A12G01801.gene	-1.94335	0.0770541562331
Ghi_D03G03946.gene	0.00447052659212	0.972925		Ghi_D03G03946.gene	-0.0627563	0.631702		Ghi_A12G01036.gene	-1.94268	0.0247173246889
Ghi_A13G06146.gene	1.85676	8.89194878961e-08		Ghi_A13G06146.gene	1.86334	3.66998028846e-08		Ghi_D03G02756.gene	-1.93977	0.0937145642953
Ghi_D10G12331.gene	0	1		Ghi_D10G12331.gene	0	1		Ghi_A11G17101.gene	-1.93908	5.37418237725e-05
Ghi_D03G03941.gene	-1.60363	8.86305735037e-21		Ghi_D03G03941.gene	0.0366125201007	0.777645		Ghi_A05G05501.gene	-1.93783	0.427225
Ghi_D06G08426.gene	-3.41111	1.81264180657e-33		Ghi_D06G08426.gene	-0.375945	0.0398992783091		Ghi_A01G10361.gene	-1.93777	0.42601
Ghi_A06G08916.gene	0	1		Ghi_A06G08916.gene	3.18926	0.234935		Ghi_A02G07121.gene	-1.93777	0.42601
Ghi_A12G09396.gene	-0.568927	0.000396018810415		Ghi_A12G09396.gene	-0.0608341	0.656241		Ghi_A05G12301.gene	-1.93776	0.425742
Ghi_A11G15996.gene	-0.74849	0.00347721123473		Ghi_A11G15996.gene	-0.29424	0.212434		Ghi_D10G04776.gene	-1.93776	0.425742
Ghi_A12G09391.gene	0	1		Ghi_A12G09391.gene	0	1		Ghi_A03G13396.gene	-1.93757	0.0555226904364
Ghi_D11G03156.gene	0.282789	0.591841		Ghi_D11G03156.gene	-0.192336	0.742939		Ghi_D09G11736.gene	-1.9353	1.02008814369e-21
Ghi_D11G06301.gene	0.177659	0.418166		Ghi_D11G06301.gene	0.0886353741123	0.691234		Ghi_A09G03961.gene	-1.93466	1.74241441321e-27
Ghi_A13G13246.gene	-0.242936	0.0913417695666		Ghi_A13G13246.gene	0.221275	0.0958747435182		Ghi_A05G06396.gene	-1.93197	0.0205827565395
Ghi_A13G11146.gene	-2.77918	0.358543		Ghi_A13G11146.gene	0.365398	0.844137		Ghi_A01G05766.gene	-1.92959	0.1349
Ghi_A03G01116.gene	0	1		Ghi_A03G01116.gene	0	1		Ghi_D05G06956.gene	-1.92833	2.52294332861e-05
Ghi_D11G06306.gene	-1.76874	0.36199		Ghi_D11G06306.gene	-3.63655	0.0980786903155		Ghi_A10G09311.gene	-1.92796	8.30531153028e-06
Ghi_D11G03151.gene	0.44127	0.344262		Ghi_D11G03151.gene	-0.000503783	0.999172		Ghi_A01G10836.gene	-1.9278	0.0824020980527
Ghi_D05G11171.gene	-0.143147	0.511308		Ghi_D05G11171.gene	1.39332	1.12088365983e-13		Ghi_D07G02261.gene	-1.92748	0.426784
Ghi_D08G14041.gene	0	1		Ghi_D08G14041.gene	0	1		Ghi_A10G02151.gene	-1.92748	0.426784
Ghi_D05G11176.gene	-1.0591	1.25837926372e-08		Ghi_D05G11176.gene	0.883134	3.73979100085e-09		Ghi_D05G09256.gene	-1.92748	0.426784
Ghi_A05G23571.gene	1.42229	7.47258814844e-05		Ghi_A05G23571.gene	1.69643	6.50777436152e-07		Ghi_A01G08741.gene	-1.92744	0.425545
Ghi_D11G02681.gene	0	1		Ghi_D11G02681.gene	0	1		Ghi_D08G11256.gene	-1.92744	0.425545
Ghi_D11G05651.gene	1.69616	1.40707166768e-27		Ghi_D11G05651.gene	0.0315752892077	0.854025		Ghi_D11G12431.gene	-1.92743	0.425272
Ghi_D11G05656.gene	0.781646	3.90779110665e-07		Ghi_D11G05656.gene	0.264812	0.0859213217342		Ghi_D02G00621.gene	-1.92743	0.425272
Ghi_D11G02686.gene	-0.0997021	0.609737		Ghi_D11G02686.gene	-0.197345	0.315998		Ghi_A03G07786.gene	-1.92743	0.425272
Ghi_A05G11936.gene	0.712426	0.0779925960771		Ghi_A05G11936.gene	0.187388	0.648565		Ghi_D11G12611.gene	-1.92743	0.425272
Ghi_A05G11931.gene	-0.318503	0.0935709777578		Ghi_A05G11931.gene	-0.229874	0.231158		Ghi_D12G07526.gene	-1.92743	0.425272
Ghi_A02G09421.gene	-0.18462	0.473101		Ghi_A02G09421.gene	0.131803	0.555786		Ghi_D09G03036.gene	-1.9271	3.33649384572e-12
Ghi_A01G06751.gene	0	1		Ghi_A01G06751.gene	0	1		Ghi_A05G05166.gene	-1.92637	0.430972
Ghi_A02G09426.gene	0.221408	0.0757634		Ghi_A02G09426.gene	0.294227	0.0104558170808		Ghi_D05G02116.gene	-1.92637	0.430972
Ghi_A08G10696.gene	0	1		Ghi_A08G10696.gene	0.982753	0.809677		Ghi_D10G02086.gene	-1.92637	0.430972
Ghi_A06G01196.gene	1.20883	1.80595520788e-10		Ghi_A06G01196.gene	0.386556	0.0747110076312		Ghi_A05G01291.gene	-1.92637	0.430972
Ghi_A08G10691.gene	0	1		Ghi_A08G10691.gene	0	1		Ghi_A09G07701.gene	-1.92637	0.430972
Ghi_A02G01211.gene	0.772164	0.00169379600578		Ghi_A02G01211.gene	0.348053	0.485019		Ghi_D08G04661.gene	-1.92632	0.429474
Ghi_A02G01216.gene	3.34021	3.09030295568e-117		Ghi_A02G01216.gene	2.33145	2.57314598622e-11		Ghi_D04G08941.gene	-1.9196	1.35546169829e-08
Ghi_D05G04696.gene	0.359824	0.000451121237138		Ghi_D05G04696.gene	-0.279184	0.00500013808985		Ghi_D11G06296.gene	-1.91729	0.433977
Ghi_A10G05061.gene	0	1		Ghi_A10G05061.gene	0	1		Ghi_A09G04666.gene	-1.91729	0.433977
Ghi_D03G06271.gene	0.163791	0.214737		Ghi_D03G06271.gene	-0.253253	0.0729793834725		Ghi_D06G09876.gene	-1.91729	0.433977
Ghi_A06G08896.gene	0	1		Ghi_A06G08896.gene	0	1		Ghi_A12G08691.gene	-1.91727	0.432739
Ghi_A07G13296.gene	0	1		Ghi_A07G13296.gene	0	1		Ghi_D01G05906.gene	-1.91727	0.432739
Ghi_A03G01096.gene	-1.90392	0.00546837289216		Ghi_A03G01096.gene	-1.04435	0.0743235245708		Ghi_A03G11556.gene	-1.91727	0.432739
Ghi_A03G01091.gene	0.29783	0.675079		Ghi_A03G01091.gene	-0.738463	0.357531		Ghi_A08G07441.gene	-1.91726	0.432466
Ghi_A07G13291.gene	-1.0431	1.52322654547e-11		Ghi_A07G13291.gene	-0.654182	2.62122967603e-06		Ghi_D05G10491.gene	-1.91559	0.405996
Ghi_A06G08891.gene	0	1		Ghi_A06G08891.gene	0	1		Ghi_D12G03476.gene	-1.91559	0.405996
Ghi_D03G06276.gene	0	1		Ghi_D03G06276.gene	1.88744	0.615622		Ghi_D06G06321.gene	-1.91559	0.405996
Ghi_D12G08341.gene	0	1		Ghi_D12G08341.gene	0	1		Ghi_D10G09691.gene	-1.91559	0.405996
Ghi_A08G13526.gene	0.646016	6.53932673971e-06		Ghi_A08G13526.gene	0.242531	0.0945388635403		Ghi_D13G04406.gene	-1.91559	0.405996
Ghi_A08G13521.gene	-0.364233	0.859333		Ghi_A08G13521.gene	-0.380417	0.851732		Ghi_D13G03216.gene	-1.91559	0.405996
Ghi_D12G08346.gene	0	1		Ghi_D12G08346.gene	0	1		Ghi_D13G09606.gene	-1.91559	0.405996
Ghi_A03G13676.gene	-0.00613211	0.954642		Ghi_A03G13676.gene	-0.0385227	0.704562		Ghi_A09G14816.gene	-1.91559	0.405996
Ghi_A07G03161.gene	-0.968226	0.140781		Ghi_A07G03161.gene	-0.444266	0.430346		Ghi_D11G12811.gene	-1.91557	0.404836
Ghi_A01G06756.gene	0	1		Ghi_A01G06756.gene	0	1		Ghi_A09G12706.gene	-1.91556	0.40458
Ghi_A07G03166.gene	-0.0907168	0.558256		Ghi_A07G03166.gene	0.000401844174267	0.998041		Ghi_D04G04201.gene	-1.91556	0.40458
Ghi_A10G02631.gene	-1.81812	2.38817460751e-13		Ghi_A10G02631.gene	-0.00520828	0.97468		Ghi_A08G04366.gene	-1.91369	0.00109786511667
Ghi_A08G12696.gene	0	1		Ghi_A08G12696.gene	0	1		Ghi_A05G05876.gene	-1.91328	0.623713
Ghi_A12G13231.gene	-0.7681	0.623068		Ghi_A12G13231.gene	0.910901	0.461948		Ghi_A06G06911.gene	-1.91328	0.623713
Ghi_A08G12691.gene	-0.90093	0.825256		Ghi_A08G12691.gene	-0.9408	0.817655		Ghi_A12G01196.gene	-1.91328	0.623713
Ghi_A10G02636.gene	-0.509306	0.00629572906392		Ghi_A10G02636.gene	0.0821020036621	0.618518		Ghi_A01G11016.gene	-1.91328	0.623713
Ghi_A12G15496.gene	0	1		Ghi_A12G15496.gene	0	1		Ghi_D09G00776.gene	-1.91328	0.623713
Ghi_A08G06171.gene	0.303084	0.0373604627236		Ghi_A08G06171.gene	0.0222822082151	0.875151		Ghi_D11G00601.gene	-1.91328	0.623713
Ghi_A07G06531.gene	0	1		Ghi_A07G06531.gene	0	1		GhiUnG00671.gene	-1.91328	0.623713
Ghi_A09G00941.gene	-1.47368	0.0289333852977		Ghi_A09G00941.gene	1.87862	1.23395755438e-07		Ghi_A13G09976.gene	-1.91328	0.623713
Ghi_A07G06536.gene	0	1		Ghi_A07G06536.gene	0	1		Ghi_A09G02341.gene	-1.91328	0.623713
Ghi_A08G06176.gene	-1.06824	0.231325		Ghi_A08G06176.gene	0.527204	0.436158		Ghi_D05G05971.gene	-1.91328	0.623713
Ghi_A12G15491.gene	-1.39322	2.13468465891e-06		Ghi_A12G15491.gene	-0.572312	0.0277241587067		Ghi_D08G13801.gene	-1.91328	0.623713
Ghi_A03G09696.gene	-1.65471	8.15630306862e-05		Ghi_A03G09696.gene	-0.78424	0.0301717448807		Ghi_A03G12881.gene	-1.91328	0.623713
Ghi_A05G19541.gene	-1.86172	0.0540674223098		Ghi_A05G19541.gene	-0.354872	0.629811		Ghi_D03G01896.gene	-1.91328	0.623713
Ghi_D08G12546.gene	0.461347	0.0350991482943		Ghi_D08G12546.gene	0.35839	0.110695		Ghi_A05G18011.gene	-1.91328	0.623713
Ghi_D08G12541.gene	0.46831	0.000125872174778		Ghi_D08G12541.gene	0.0727126413004	0.568065		Ghi_A08G02361.gene	-1.91328	0.623713
Ghi_A03G09691.gene	0	1		Ghi_A03G09691.gene	0	1		Ghi_A05G21316.gene	-1.91328	0.623713
Ghi_A03G10616.gene	-0.568308	0.00289029766068		Ghi_A03G10616.gene	-0.527861	0.00643815658072		Ghi_D06G05466.gene	-1.91328	0.623713
Ghi_A08G15316.gene	-0.617075	0.0404366738233		Ghi_A08G15316.gene	0.704076	0.0025056484229		Ghi_D03G00801.gene	-1.91328	0.623713
Ghi_A12G12726.gene	-0.155829	0.217366		Ghi_A12G12726.gene	-0.654408	5.76976988207e-07		Ghi_A05G20876.gene	-1.91328	0.623713
Ghi_A12G12721.gene	0.377726	0.00798733920735		Ghi_A12G12721.gene	0.0316686852194	0.814206		Ghi_D09G09116.gene	-1.91328	0.623713
Ghi_A13G13366.gene	2.04984	0.0431863983755		Ghi_A13G13366.gene	1.84366	0.0785315		Ghi_A05G04851.gene	-1.91328	0.623713
Ghi_A09G10406.gene	0.920694	7.70702673748e-06		Ghi_A09G10406.gene	0.106074	0.640685		Ghi_A07G01306.gene	-1.91328	0.623713
Ghi_A05G03476.gene	-0.786489	0.00160172420729		Ghi_A05G03476.gene	0.20941	0.25061		Ghi_A13G06096.gene	-1.91328	0.623713
Ghi_A03G01321.gene	1.35055	0.000143907451728		Ghi_A03G01321.gene	0.437627	0.260733		Ghi_A11G14306.gene	-1.91328	0.623713
Ghi_A03G01326.gene	-0.0743194	0.488639		Ghi_A03G01326.gene	-0.321478	0.00306267187553		Ghi_D01G04946.gene	-1.91328	0.623713
Ghi_A05G03471.gene	-0.176629	0.370891		Ghi_A05G03471.gene	-0.323772	0.0756293177719		Ghi_A11G08626.gene	-1.91328	0.623713
Ghi_A09G10401.gene	0.390925	0.000461444219886		Ghi_A09G10401.gene	0.0657492300129	0.548135		Ghi_D01G04776.gene	-1.91328	0.623713
Ghi_A01G08431.gene	0	1		Ghi_A01G08431.gene	0	1		Ghi_A12G04921.gene	-1.91328	0.623713
Ghi_A09G14536.gene	-0.35467	0.0622358835857		Ghi_A09G14536.gene	-0.339713	0.0595952		Ghi_A11G03021.gene	-1.91328	0.623713
Ghi_A12G08446.gene	0	1		Ghi_A12G08446.gene	0	1		Ghi_D06G03236.gene	-1.91328	0.623713
Ghi_A01G02161.gene	-1.43087	0.22917		Ghi_A01G02161.gene	-1.20089	0.301085		GhiUnG02031.gene	-1.91328	0.623713
Ghi_A01G02166.gene	-3.42201	0.0506668892045		Ghi_A01G02166.gene	0.239748	0.807598		Ghi_A11G06276.gene	-1.91328	0.623713
Ghi_A11G10146.gene	-4.59328	1.49581949605e-07		Ghi_A11G10146.gene	-2.96167	2.34941565699e-06		Ghi_D05G11991.gene	-1.91328	0.623713
Ghi_A12G08441.gene	1.09152	1.88137124171e-08		Ghi_A12G08441.gene	-0.0730875	0.742076		Ghi_A10G13601.gene	-1.91328	0.623713
Ghi_A09G14531.gene	0.674837	0.000152033522428		Ghi_A09G14531.gene	0.2752	0.150224		Ghi_A10G13166.gene	-1.91328	0.623713
Ghi_A03G11576.gene	0.4217	0.0205860433011		Ghi_A03G11576.gene	-0.348953	0.0944014621364		Ghi_A02G03046.gene	-1.91328	0.623713
Ghi_A08G12341.gene	-0.370472	0.0340542722389		Ghi_A08G12341.gene	0.140257	0.383722		Ghi_A10G05551.gene	-1.91328	0.623713
Ghi_A08G12346.gene	0	1		Ghi_A08G12346.gene	0	1		Ghi_A02G04086.gene	-1.91328	0.623713
Ghi_A03G11571.gene	0	1		Ghi_A03G11571.gene	0	1		Ghi_D12G06101.gene	-1.91328	0.623713
Ghi_A13G09771.gene	-1.28587	5.96487216322e-13		Ghi_A13G09771.gene	-0.780052	2.7556745653e-06		Ghi_D08G01001.gene	-1.91328	0.623713
Ghi_A13G09776.gene	-0.018647	0.892037		Ghi_A13G09776.gene	-0.207507	0.137657		Ghi_A11G16781.gene	-1.91328	0.623713
Ghi_A11G10141.gene	-0.244274	0.519814		Ghi_A11G10141.gene	-0.316021	0.426357		Ghi_D07G09691.gene	-1.91328	0.623713
Ghi_A01G07606.gene	0	1		Ghi_A01G07606.gene	0	1		Ghi_D11G16931.gene	-1.91328	0.623713
Ghi_A01G07601.gene	0	1		Ghi_A01G07601.gene	0	1		Ghi_D01G00356.gene	-1.91328	0.623713
Ghi_A01G00226.gene	3.43053	1.06845083326e-61		Ghi_A01G00226.gene	1.04936	0.000121475466416		Ghi_A03G00366.gene	-1.91328	0.623713
Ghi_D03G06896.gene	0.224379	0.487619		Ghi_D03G06896.gene	0.384081	0.206486		Ghi_A13G11031.gene	-1.91328	0.623713
Ghi_D03G06891.gene	0.569836	0.000237717361525		Ghi_D03G06891.gene	-0.235171	0.198537		Ghi_D04G08611.gene	-1.91328	0.623713
Ghi_D08G09406.gene	-2.34358	1.09468417328e-18		Ghi_D08G09406.gene	-0.383377	0.0646799770835		Ghi_D10G07416.gene	-1.91328	0.623713
Ghi_A12G04146.gene	-1.58399	4.78375822034e-08		Ghi_A12G04146.gene	0.111104	0.606247		Ghi_A09G00201.gene	-1.91328	0.623713
Ghi_D05G06276.gene	0.49682	7.8932037287e-05		Ghi_D05G06276.gene	0.305241	0.0111573166076		Ghi_D05G13606.gene	-1.91328	0.623713
Ghi_D02G11841.gene	-0.929561	1.76953111351e-12		Ghi_D02G11841.gene	-0.427678	0.000433363579184		GhiUnG00756.gene	-1.91328	0.623713
Ghi_D02G11846.gene	-0.258467	0.462923		Ghi_D02G11846.gene	-0.198743	0.54779		Ghi_A13G03581.gene	-1.91328	0.623713
Ghi_D05G06271.gene	2.98108	1.07745340641e-105		Ghi_D05G06271.gene	0.864921	3.15721866933e-06		GhiUnG02051.gene	-1.91328	0.623713
Ghi_A12G04141.gene	0	1		Ghi_A12G04141.gene	0	1		Ghi_D13G07746.gene	-1.91328	0.623713
Ghi_A03G04311.gene	0.84016	4.57349548608e-06		Ghi_A03G04311.gene	0.190926	0.281353		Ghi_D11G16771.gene	-1.91328	0.623713
Ghi_A05G13261.gene	3.62451	2.36544684407e-224		Ghi_A05G13261.gene	1.07833	1.27694431513e-14		Ghi_D13G09626.gene	-1.91328	0.623713
Ghi_A02G02746.gene	-0.62728	0.0521427627462		Ghi_A02G02746.gene	0.855023	0.00205214624208		Ghi_A09G04661.gene	-1.91328	0.623713
Ghi_A02G02741.gene	0.251362	0.0543543055684		Ghi_A02G02741.gene	0.0421694	0.752884		GhiUnG01046.gene	-1.91328	0.623713
Ghi_A05G13266.gene	0.528508	0.000488930309823		Ghi_A05G13266.gene	-0.00321224	0.984064		Ghi_A08G03806.gene	-1.91328	0.623713
Ghi_A03G04316.gene	0.374769	0.0038221578659		Ghi_A03G04316.gene	0.0108274911275	0.937044		Ghi_A03G06636.gene	-1.91328	0.623713
Ghi_D01G07891.gene	-0.0961612	0.790636		Ghi_D01G07891.gene	-0.106807	0.76357		Ghi_A09G07876.gene	-1.91328	0.623713
Ghi_D10G11171.gene	0.257963	0.6391		Ghi_D10G11171.gene	-0.644785	0.289145		Ghi_D13G08816.gene	-1.91328	0.623713
Ghi_D10G11176.gene	1.37842	0.358342		Ghi_D10G11176.gene	-1.90058	0.450807		Ghi_A12G13086.gene	-1.91328	0.623713
Ghi_A01G00221.gene	1.12687	0.000325011159404		Ghi_A01G00221.gene	0.452753	0.241707		Ghi_D09G09156.gene	-1.91328	0.623713
Ghi_D01G07896.gene	0.347107	0.291297		Ghi_D01G07896.gene	-0.0327492	0.93039		Ghi_A05G03296.gene	-1.91328	0.623713
Ghi_D07G11421.gene	0.196031	0.177501		Ghi_D07G11421.gene	0.0241267589293	0.871525		Ghi_A08G10146.gene	-1.91328	0.623713
Ghi_D07G11426.gene	0.0656088799398	0.657751		Ghi_D07G11426.gene	-0.0873648	0.559649		Ghi_D08G00641.gene	-1.91328	0.623713
Ghi_D08G04921.gene	1.25027	0.47104		Ghi_D08G04921.gene	-1.4741	0.58753		Ghi_A09G09031.gene	-1.91328	0.623713
Ghi_A01G01601.gene	0	1		Ghi_A01G01601.gene	0	1		Ghi_D08G00261.gene	-1.91328	0.623713
Ghi_A01G01606.gene	2.57143	0.0614663264524		Ghi_A01G01606.gene	0.735781	0.703558		Ghi_D08G11656.gene	-1.91328	0.623713
Ghi_D06G10411.gene	5.06405	3.3868352315e-27		Ghi_D06G10411.gene	1.42842	0.000408232756087		Ghi_A10G09451.gene	-1.91328	0.623713
Ghi_D08G04926.gene	0	1		Ghi_D08G04926.gene	0	1		Ghi_A11G06316.gene	-1.91133	0.119974
Ghi_D13G08341.gene	-0.404315	0.0484701950823		Ghi_D13G08341.gene	-0.416455	0.0271718810805		Ghi_A05G17616.gene	-1.90945	0.0125189394821
Ghi_A03G05951.gene	-2.73938	0.0706720832385		Ghi_A03G05951.gene	0.456554	0.6216		Ghi_A05G04131.gene	-1.90867	2.09794958863e-05
Ghi_D07G10771.gene	0.480184	0.000190100253045		Ghi_D07G10771.gene	0.372892	0.00322982212728		Ghi_A05G14481.gene	-1.90865	0.0109487516636
Ghi_D07G10776.gene	-1.33034	1.16096399203e-11		Ghi_D07G10776.gene	0.135001	0.394976		Ghi_A11G08211.gene	-1.90813	0.192911
Ghi_A03G05956.gene	0.19761	0.138384		Ghi_A03G05956.gene	0.175843	0.209754		Ghi_A13G05891.gene	-1.90699	0.468172
Ghi_A05G08396.gene	-1.48063	8.67775587039e-19		Ghi_A05G08396.gene	-0.735744	3.06090875529e-07		Ghi_D05G14446.gene	-1.90699	0.468172
Ghi_A07G08076.gene	0	1		Ghi_A07G08076.gene	0	1		Ghi_A08G15031.gene	-1.90585	3.01361258564e-32
Ghi_A07G08071.gene	0.53071	0.565837		Ghi_A07G08071.gene	1.1812	0.15157		Ghi_A09G02741.gene	-1.90563	0.409315
Ghi_D05G02676.gene	-0.277326	0.619257		Ghi_D05G02676.gene	-0.208652	0.705196		Ghi_D01G00096.gene	-1.90563	0.409315
Ghi_D02G11591.gene	-2.79009	0.301449		Ghi_D02G11591.gene	0.0256885812258	0.988669		Ghi_D09G01626.gene	-1.90563	0.408141
Ghi_A10G12251.gene	1.00977	0.125941		Ghi_A10G12251.gene	0.498599	0.495238		Ghi_D08G01421.gene	-1.90563	0.408141
Ghi_D05G07426.gene	-1.62324	0.0180797659421		Ghi_D05G07426.gene	-0.118877	0.587028		Ghi_D08G05686.gene	-1.90563	0.408141
Ghi_A10G12256.gene	0	1		Ghi_A10G12256.gene	0	1		Ghi_A02G03891.gene	-1.90563	0.407883
Ghi_A06G12866.gene	0.119837	0.493796		Ghi_A06G12866.gene	0.217781	0.178724		Ghi_D05G00496.gene	-1.90563	0.407883
Ghi_D02G11596.gene	-0.256827	0.497089		Ghi_D02G11596.gene	-0.466481	0.232082		Ghi_A13G04181.gene	-1.90444	0.434387
Ghi_A07G10246.gene	0.151743	0.135844		Ghi_A07G10246.gene	-0.0780979	0.461944		Ghi_A09G12206.gene	-1.90444	0.434387
Ghi_A04G08176.gene	-0.603115	0.00231721566384		Ghi_A04G08176.gene	-0.319011	0.0767698902193		Ghi_D10G10241.gene	-1.90444	0.434387
Ghi_A12G12526.gene	0.765849	0.132921		Ghi_A12G12526.gene	0.0460037960393	0.930468		Ghi_D13G03816.gene	-1.90444	0.434387
Ghi_A07G10241.gene	-0.0600687	0.781588		Ghi_A07G10241.gene	0.297808	0.151318		Ghi_D11G03211.gene	-1.90444	0.434387
Ghi_A07G13586.gene	0	1		Ghi_A07G13586.gene	0	1		Ghi_D07G11966.gene	-1.90444	0.434387
Ghi_D01G09321.gene	0	1		Ghi_D01G09321.gene	0	1		Ghi_A03G01101.gene	-1.90444	0.433122
Ghi_A06G03831.gene	-0.599599	0.00183139941185		Ghi_A06G03831.gene	-0.0176809	0.919847		Ghi_D01G08151.gene	-1.90444	0.433122
Ghi_A08G02411.gene	0	1		Ghi_A08G02411.gene	0	1		Ghi_A12G03531.gene	-1.90444	0.433122
Ghi_A08G02416.gene	0.0703029152288	0.721515		Ghi_A08G02416.gene	-0.0418928	0.832344		Ghi_A03G01811.gene	-1.90444	0.432843
Ghi_A06G03836.gene	-0.216691	0.460428		Ghi_A06G03836.gene	-0.219952	0.451768		Ghi_A13G05571.gene	-1.90444	0.432843
Ghi_A05G02706.gene	-0.543234	4.74674135242e-05		Ghi_A05G02706.gene	0.00837338294903	0.944834		Ghi_A11G10011.gene	-1.90285	0.0205498698218
Ghi_A04G02601.gene	0	1		Ghi_A04G02601.gene	0	1		Ghi_D04G06106.gene	-1.90241	2.45237252993e-09
Ghi_A05G02701.gene	0.404912	0.00138650899966		Ghi_A05G02701.gene	-0.0217094	0.872543		Ghi_D10G02161.gene	-1.90165	2.20234605656e-06
Ghi_D03G08361.gene	-6.04457	1.02853130482e-71		Ghi_D03G08361.gene	-1.79336	9.92102068747e-29		Ghi_D01G01846.gene	-1.90102	0.197356
Ghi_A05G08341.gene	0	1		Ghi_A05G08341.gene	0	1		Ghi_A09G13026.gene	-1.9002	0.0459071582226
Ghi_A08G07621.gene	7.39011	3.12796502284e-08		Ghi_A08G07621.gene	0	1		Ghi_D04G09441.gene	-1.89961	0.233899
Ghi_A08G07626.gene	1.34492	2.59055572178e-14		Ghi_A08G07626.gene	0.0888265745244	0.54213		Ghi_A10G01616.gene	-1.8986	0.193896
Ghi_A05G08346.gene	0.594313	0.000435754362985		Ghi_A05G08346.gene	0.262304	0.13567		Ghi_D03G09046.gene	-1.89769	7.70194486583e-35
Ghi_D03G08366.gene	-3.09037	2.49245023403e-10		Ghi_D03G08366.gene	-0.629955	1.17722452443e-06		Ghi_D03G09216.gene	-1.89667	7.62058187864e-23
Ghi_D01G04751.gene	3.41166	0.0581511994997		Ghi_D01G04751.gene	0.0209819248873	0.995615		Ghi_D10G01511.gene	-1.89624	0.20687
Ghi_A04G08171.gene	-2.40341	0.473098		Ghi_A04G08171.gene	-2.44501	0.445652		Ghi_D12G12631.gene	-1.89615	0.00255790713132
Ghi_A03G12006.gene	0.412305	0.0245076635464		Ghi_A03G12006.gene	0.0028417211918	0.988025		Ghi_D12G11941.gene	-1.89526	0.4397
Ghi_A09G10706.gene	0	1		Ghi_A09G10706.gene	0	1		Ghi_A09G08636.gene	-1.89526	0.4397
Ghi_A13G04551.gene	1.28051	0.122961		Ghi_A13G04551.gene	0.756283	0.407481		Ghi_D04G02326.gene	-1.89526	0.439978
Ghi_A03G12001.gene	-0.873557	1.15202025835e-08		Ghi_A03G12001.gene	-0.355773	0.00965316563021		Ghi_A08G06291.gene	-1.89526	0.439978
Ghi_A05G23916.gene	0	1		Ghi_A05G23916.gene	0	1		Ghi_D05G10511.gene	-1.89524	0.441241
Ghi_D07G03976.gene	-0.294809	0.00266722327053		Ghi_D07G03976.gene	-0.213686	0.0232351578247		Ghi_A06G00476.gene	-1.89524	0.441241
Ghi_A01G03751.gene	0.161728	0.264302		Ghi_A01G03751.gene	-0.200465	0.16753		Ghi_D06G00641.gene	-1.89524	0.441241
Ghi_D04G08076.gene	0.47383	0.387849		Ghi_D04G08076.gene	0.0265798863887	0.964324		Ghi_A03G07266.gene	-1.89524	0.441241
Ghi_A08G00246.gene	-0.199235	0.536332		Ghi_A08G00246.gene	-0.236357	0.427551		Ghi_A10G13541.gene	-1.89442	0.411605
Ghi_A05G23911.gene	0.48949	0.0505525522302		Ghi_A05G23911.gene	0.357594	0.160843		Ghi_A01G09191.gene	-1.89442	0.411605
Ghi_D02G05271.gene	0	1		Ghi_D02G05271.gene	0	1		Ghi_A03G02881.gene	-1.89441	0.411867
Ghi_A01G02836.gene	0	1		Ghi_A01G02836.gene	0	1		Ghi_D06G05721.gene	-1.89441	0.411867
Ghi_A10G07121.gene	0.24229	0.168538		Ghi_A10G07121.gene	0.110545	0.548331		Ghi_D06G06346.gene	-1.8944	0.413054
Ghi_A01G02831.gene	-0.196906	0.62438		Ghi_A01G02831.gene	-0.364243	0.356288		Ghi_D11G08446.gene	-1.8944	0.413054
Ghi_A07G11441.gene	-0.206433	0.42461		Ghi_A07G11441.gene	-0.381299	0.152917		Ghi_A04G06181.gene	-1.8944	0.413054
GhiUnG00521.gene	-0.401292	0.688482		GhiUnG00521.gene	-0.156685	0.848274		Ghi_D06G01381.gene	-1.8944	0.413054
Ghi_D09G03056.gene	0	1		Ghi_D09G03056.gene	0	1		Ghi_D06G12226.gene	-1.8944	0.413054
Ghi_A08G00241.gene	-0.795245	7.43493310279e-08		Ghi_A08G00241.gene	-0.169597	0.153982		Ghi_D10G08766.gene	-1.89264	0.0428315581498
Ghi_A12G07491.gene	-0.805303	0.337248		Ghi_A12G07491.gene	-0.254537	0.734569		Ghi_A13G14091.gene	-1.89254	0.19324
Ghi_A12G07496.gene	-3.53922	1.7157375991e-78		Ghi_A12G07496.gene	-0.404645	0.00178473628596		Ghi_A03G01441.gene	-1.89158	3.71204873299e-07
GhiUnG01011.gene	-1.43779	0.158035		GhiUnG01011.gene	-1.03614	0.252252		Ghi_D05G02806.gene	-1.89077	9.99820033157e-06
Ghi_D05G12286.gene	-2.27428	0.168523		Ghi_D05G12286.gene	-0.710792	0.595263		Ghi_D05G10901.gene	-1.89047	0.599449
Ghi_D10G10226.gene	0	1		Ghi_D10G10226.gene	0	1		Ghi_D11G15286.gene	-1.89047	0.599449
Ghi_D10G10221.gene	0	1		Ghi_D10G10221.gene	0	1		Ghi_D13G04601.gene	-1.89047	0.599449
Ghi_A03G08106.gene	-0.123743	0.332471		Ghi_A03G08106.gene	-0.205117	0.108091		Ghi_D02G11071.gene	-1.89047	0.599449
Ghi_D05G12281.gene	0	1		Ghi_D05G12281.gene	0.982753	0.809677		Ghi_D13G05401.gene	-1.89047	0.599449
GhiUnG01016.gene	0	1		GhiUnG01016.gene	0	1		Ghi_D09G06481.gene	-1.89047	0.599449
Ghi_A01G10361.gene	2.9552	0.320411		Ghi_A01G10361.gene	1.87176	0.620245		Ghi_A11G13376.gene	-1.89047	0.599449
Ghi_A01G10366.gene	0	1		Ghi_A01G10366.gene	0	1		Ghi_A09G13421.gene	-1.89047	0.599449
Ghi_A09G00016.gene	-1.76788	0.66171		Ghi_A09G00016.gene	0.61615	0.822164		Ghi_A08G06571.gene	-1.89047	0.599449
Ghi_D07G04686.gene	0	1		Ghi_D07G04686.gene	0	1		Ghi_A08G06881.gene	-1.89047	0.599449
GhiUnG00761.gene	-0.813118	0.428137		GhiUnG00761.gene	-0.0828109	0.928329		Ghi_D02G02351.gene	-1.89047	0.599449
Ghi_D02G05276.gene	0	1		Ghi_D02G05276.gene	0	1		Ghi_A12G04706.gene	-1.89047	0.599449
Ghi_D02G11331.gene	1.09195	2.54917722694e-06		Ghi_D02G11331.gene	0.46117	0.0767577478898		Ghi_D10G00771.gene	-1.89047	0.599449
Ghi_D07G02466.gene	3.51938	0.126607		Ghi_D07G02466.gene	0	1		Ghi_A12G02296.gene	-1.89047	0.599449
GhiUnG00766.gene	0.251749	0.700128		GhiUnG00766.gene	1.21531	0.0233582221253		Ghi_A06G11531.gene	-1.89047	0.599449
Ghi_D07G04681.gene	0.270654	0.1654		Ghi_D07G04681.gene	1.59282	1.68377073425e-06		Ghi_D12G14701.gene	-1.89047	0.599449
Ghi_D01G01991.gene	1.68016	1.29386744626e-18		Ghi_D01G01991.gene	0.929723	1.8072733037e-06		Ghi_A01G02721.gene	-1.89047	0.599449
Ghi_D01G05631.gene	-0.799765	1.61126189266e-06		Ghi_D01G05631.gene	-0.276413	0.0721701324188		Ghi_D01G00551.gene	-1.89047	0.599449
Ghi_D01G05636.gene	-0.90093	0.825256		Ghi_D01G05636.gene	0.0209818071335	0.995637		Ghi_D10G06576.gene	-1.89047	0.599449
Ghi_D01G01996.gene	2.39369	0.0128714811556		Ghi_D01G01996.gene	1.83087	0.0822526333177		Ghi_A07G10166.gene	-1.89047	0.599449
Ghi_D04G08686.gene	0.5929	0.00176201572739		Ghi_D04G08686.gene	0.19979	0.305182		Ghi_A04G00521.gene	-1.89047	0.599449
Ghi_D08G11606.gene	-0.0308869	0.817492		Ghi_D08G11606.gene	-0.265666	0.0587510349658		Ghi_D13G10086.gene	-1.89047	0.599449
Ghi_A11G11741.gene	0.153934	0.275856		Ghi_A11G11741.gene	-0.0206565	0.885992		Ghi_A05G15531.gene	-1.89047	0.599449
Ghi_A05G01066.gene	-1.83792	1.62780228116e-12		Ghi_A05G01066.gene	0.94789	1.07968269717e-06		Ghi_A04G06046.gene	-1.89047	0.599449
Ghi_D06G05251.gene	0.86672	0.000433341053619		Ghi_D06G05251.gene	0.257637	0.280837		Ghi_D08G06836.gene	-1.89047	0.599449
Ghi_A02G01411.gene	-0.546466	3.99221121888e-07		Ghi_A02G01411.gene	-0.173624	0.0769722136626		Ghi_D12G05511.gene	-1.89047	0.599449
Ghi_D06G05256.gene	-1.8114	0.644096		Ghi_D06G05256.gene	-0.889038	0.768405		Ghi_A08G10686.gene	-1.89047	0.599449
Ghi_D07G02901.gene	-1.76788	0.66171		Ghi_D07G02901.gene	0.0414828988816	0.987976		Ghi_A06G03966.gene	-1.89047	0.599449
Ghi_A11G11746.gene	0	1		Ghi_A11G11746.gene	0	1		Ghi_D08G04761.gene	-1.89047	0.599449
Ghi_D01G02941.gene	0.779425	0.427288		Ghi_D01G02941.gene	1.01455	0.255189		Ghi_D01G02426.gene	-1.89047	0.599449
Ghi_A12G07726.gene	4.96143	0.000533878761131		Ghi_A12G07726.gene	2.23238	0.31618		Ghi_D04G10871.gene	-1.89047	0.599449
Ghi_D11G11611.gene	0	1		Ghi_D11G11611.gene	0	1		Ghi_D13G10386.gene	-1.89047	0.599449
Ghi_D11G11616.gene	0	1		Ghi_D11G11616.gene	0	1		Ghi_A11G13126.gene	-1.89047	0.599449
Ghi_A13G11491.gene	0.313989	0.0197962682963		Ghi_A13G11491.gene	0.2866	0.038694		Ghi_D06G06111.gene	-1.89047	0.599449
Ghi_A12G07721.gene	-0.176781	0.574195		Ghi_A12G07721.gene	0.248954	0.352937		Ghi_D12G00606.gene	-1.89047	0.599449
Ghi_D01G02946.gene	-1.39187	0.655038		Ghi_D01G02946.gene	-1.42962	0.631614		Ghi_D12G06281.gene	-1.89047	0.599449
Ghi_A03G07831.gene	0	1		Ghi_A03G07831.gene	0	1		Ghi_D08G14631.gene	-1.89047	0.599449
Ghi_D01G00681.gene	0.481868	3.67393513203e-06		Ghi_D01G00681.gene	0.0301931347718	0.792327		Ghi_D05G04381.gene	-1.89047	0.599449
Ghi_A03G07836.gene	0	1		Ghi_A03G07836.gene	0	1		Ghi_D09G10751.gene	-1.89047	0.599449
Ghi_A11G10296.gene	0.801537	4.15504912669e-13		Ghi_A11G10296.gene	0.0160563711272	0.884557		Ghi_D06G04276.gene	-1.89047	0.599449
Ghi_A11G10291.gene	1.08519	7.8857491406e-15		Ghi_A11G10291.gene	0.21321	0.196145		Ghi_D06G05536.gene	-1.89047	0.599449
Ghi_A13G11496.gene	0.320126	0.151744		Ghi_A13G11496.gene	0.63026	0.000695775621501		Ghi_D05G07651.gene	-1.89047	0.599449
Ghi_D07G04536.gene	-1.22462	1.32106602485e-05		Ghi_D07G04536.gene	-0.580502	0.02617		Ghi_D11G15946.gene	-1.89047	0.599449
Ghi_D07G04531.gene	2.96253	1.19666996934e-09		Ghi_D07G04531.gene	1.15834	0.0695065683477		Ghi_D04G03776.gene	-1.89047	0.599449
Ghi_A01G12986.gene	0.463944	0.498684		Ghi_A01G12986.gene	1.21917	0.0347337528702		Ghi_A01G00951.gene	-1.89047	0.599449
Ghi_D08G14616.gene	0.168657	0.391952		Ghi_D08G14616.gene	-0.0697034	0.754267		Ghi_A12G03401.gene	-1.89047	0.599449
Ghi_A11G17746.gene	-4.09016	2.95692508316e-59		Ghi_A11G17746.gene	-0.824717	1.48675931939e-08		GhiUnG02216.gene	-1.89047	0.599449
Ghi_A08G09506.gene	0.255956	0.0536295539286		Ghi_A08G09506.gene	0.0392986609303	0.748936		Ghi_D02G02071.gene	-1.89047	0.599449
Ghi_A09G05546.gene	-0.133876	0.276959		Ghi_A09G05546.gene	-0.126253	0.289473		Ghi_D06G08121.gene	-1.89047	0.599449
Ghi_A08G09501.gene	0	1		Ghi_A08G09501.gene	0	1		Ghi_D08G05986.gene	-1.89047	0.599449
Ghi_A11G17741.gene	0	1		Ghi_A11G17741.gene	0	1		Ghi_D12G06456.gene	-1.89047	0.599449
Ghi_A10G11671.gene	0.1078	0.511751		Ghi_A10G11671.gene	0.00388475820913	0.981849		Ghi_D02G11891.gene	-1.89047	0.599449
Ghi_D05G03356.gene	-1.50625	0.470074		Ghi_D05G03356.gene	1.15169	0.368978		Ghi_D11G09046.gene	-1.89047	0.599449
Ghi_A06G05291.gene	0	1		Ghi_A06G05291.gene	0	1		Ghi_D09G06801.gene	-1.89047	0.599449
Ghi_A06G05296.gene	0	1		Ghi_A06G05296.gene	0	1		Ghi_A11G13481.gene	-1.89047	0.599449
Ghi_D05G03351.gene	-0.844361	1.57016800177e-07		Ghi_D05G03351.gene	-0.476965	0.00162077200257		Ghi_A10G08061.gene	-1.89047	0.599449
Ghi_A07G04516.gene	-0.679062	5.46242070621e-14		Ghi_A07G04516.gene	-0.0741952	0.390522		Ghi_D11G09546.gene	-1.89047	0.599449
Ghi_D06G02926.gene	-0.510668	0.00358933014563		Ghi_D06G02926.gene	-0.180839	0.273361		Ghi_D10G04466.gene	-1.89047	0.599449
Ghi_D12G11711.gene	-0.678658	4.99264516316e-05		Ghi_D12G11711.gene	-0.250949	0.0959207388564		Ghi_A07G12801.gene	-1.89047	0.599449
Ghi_A06G08076.gene	0.209099	0.565305		Ghi_A06G08076.gene	-0.129751	0.741481		Ghi_D12G07571.gene	-1.89047	0.599449
Ghi_A06G08071.gene	-1.76788	0.66171		Ghi_A06G08071.gene	-0.845624	0.798817		Ghi_D01G04901.gene	-1.89047	0.599449
Ghi_A10G13366.gene	0	1		Ghi_A10G13366.gene	0	1		Ghi_A12G02306.gene	-1.89047	0.599449
Ghi_D12G11716.gene	0.52111	5.26547315839e-06		Ghi_D12G11716.gene	0.245529	0.0338899293434		Ghi_A09G10701.gene	-1.89047	0.599449
Ghi_A02G04081.gene	-0.796238	2.2515273699e-05		Ghi_A02G04081.gene	-0.59106	0.000483575456802		Ghi_A03G10661.gene	-1.89047	0.599449
Ghi_D07G05481.gene	-0.234199	0.165255		Ghi_D07G05481.gene	-0.162013	0.313978		Ghi_A06G02296.gene	-1.89047	0.599449
Ghi_A05G18816.gene	0	1		Ghi_A05G18816.gene	0	1		Ghi_A07G06781.gene	-1.89047	0.599449
Ghi_D07G05486.gene	-0.414011	0.278532		Ghi_D07G05486.gene	-0.637265	0.109968		Ghi_A03G04151.gene	-1.89047	0.599449
Ghi_A09G13161.gene	0	1		Ghi_A09G13161.gene	0	1		Ghi_A13G06246.gene	-1.89047	0.599449
Ghi_A08G05661.gene	0	1		Ghi_A08G05661.gene	0.982753	0.809677		Ghi_D08G10956.gene	-1.89047	0.599449
Ghi_A07G11626.gene	0	1		Ghi_A07G11626.gene	0	1		GhiUnG02666.gene	-1.88956	0.540093
Ghi_A02G00426.gene	0	1		Ghi_A02G00426.gene	0.982753	0.809677		Ghi_D05G02516.gene	-1.88896	0.232086
Ghi_A07G11621.gene	0	1		Ghi_A07G11621.gene	0	1		Ghi_D04G02821.gene	-1.8889	2.95725217353e-05
Ghi_A06G06926.gene	-0.557904	8.56349228109e-06		Ghi_A06G06926.gene	-0.0355403	0.764624		Ghi_A10G14196.gene	-1.88854	0.20812
Ghi_A03G07551.gene	-0.528865	0.000637322690827		Ghi_A03G07551.gene	-0.122607	0.378873		Ghi_A03G00306.gene	-1.88691	0.000622462197048
Ghi_D08G04136.gene	-0.232512	0.912399		Ghi_D08G04136.gene	1.04667	0.509212		Ghi_D04G08431.gene	-1.88548	0.193851
Ghi_A07G11836.gene	0.765199	0.487396		Ghi_A07G11836.gene	0.0296491990937	0.982446		Ghi_A12G15786.gene	-1.88363	0.439761
Ghi_A12G10816.gene	-1.72171	0.344467		Ghi_A12G10816.gene	0.552132	0.664356		Ghi_A01G10591.gene	-1.88363	0.439761
Ghi_A12G10811.gene	0.223457	0.547704		Ghi_A12G10811.gene	0.677355	0.0379766501817		Ghi_A04G02701.gene	-1.88363	0.439761
Ghi_D01G00766.gene	0	1		Ghi_D01G00766.gene	0	1		Ghi_A05G12601.gene	-1.88362	0.440046
Ghi_A13G02266.gene	0	1		Ghi_A13G02266.gene	0	1		Ghi_D06G00991.gene	-1.88362	0.440046
Ghi_D02G00451.gene	0.263761	0.211044		Ghi_D02G00451.gene	-0.00240286	0.991657		Ghi_D05G11516.gene	-1.88362	0.440046
Ghi_A06G00516.gene	-0.175582	0.207245		Ghi_A06G00516.gene	0.328624	0.0113826363448		Ghi_D07G12756.gene	-1.88362	0.113538
Ghi_A06G05741.gene	0.502187	8.25287869223e-07		Ghi_A06G05741.gene	0.322825	0.00163814777575		Ghi_A10G05581.gene	-1.88359	0.441336
Ghi_A08G00101.gene	5.98287	2.10732119848e-05		Ghi_A08G00101.gene	4.43819	0.00344023195388		Ghi_D06G06896.gene	-1.88359	0.441336
Ghi_D10G02496.gene	-4.72489	5.28379811983e-05		Ghi_D10G02496.gene	-1.13699	0.102309		Ghi_A12G07326.gene	-1.88359	0.441336
Ghi_D10G02491.gene	-2.87047	0.000692108948621		Ghi_D10G02491.gene	-1.42066	0.0345008578399		Ghi_A01G03821.gene	-1.88227	0.443964
Ghi_A08G00106.gene	0.798396	2.01706728885e-09		Ghi_A08G00106.gene	0.0924692450431	0.523974		Ghi_A08G13846.gene	-1.88227	0.443964
Ghi_A06G05746.gene	0	1		Ghi_A06G05746.gene	0	1		Ghi_A11G03251.gene	-1.88227	0.443964
Ghi_A06G00511.gene	-1.96105	0.10982		Ghi_A06G00511.gene	0.278177	0.734267		Ghi_D13G11511.gene	-1.88227	0.443964
Ghi_D11G06846.gene	0.627577	1.53672290639e-06		Ghi_D11G06846.gene	-0.0410896	0.767893		Ghi_A02G10101.gene	-1.88226	0.444246
Ghi_A01G11091.gene	-0.641225	0.153226		Ghi_A01G11091.gene	0.631183	0.0491766967853		Ghi_D01G09791.gene	-1.88222	0.445522
Ghi_A01G11096.gene	-0.175654	0.510476		Ghi_A01G11096.gene	-0.106117	0.690559		Ghi_D09G00221.gene	-1.88222	0.445522
Ghi_D05G00156.gene	-0.234538	0.533328		Ghi_D05G00156.gene	-0.387703	0.308569		Ghi_A10G04896.gene	-1.88222	0.445522
Ghi_D11G06841.gene	2.78541	0.0878267537213		Ghi_D11G06841.gene	0.627901	0.802824		Ghi_A05G08056.gene	-1.88222	0.445522
Ghi_A09G07871.gene	-2.1742	1.73532538807e-31		Ghi_A09G07871.gene	-0.620514	1.68203362304e-05		Ghi_D09G06646.gene	-1.8812	0.00215313045653
Ghi_A03G13066.gene	-0.730386	0.176273		Ghi_A03G13066.gene	-0.128446	0.798431		Ghi_A07G06386.gene	-1.87993	0.0714478924942
Ghi_A05G09911.gene	0.19504	0.0812118425965		Ghi_A05G09911.gene	0.0784780563252	0.466239		Ghi_A13G06786.gene	-1.87949	0.0647254807185
Ghi_A05G09916.gene	1.02262	0.802113		Ghi_A05G09916.gene	1.89293	0.639103		Ghi_D04G01316.gene	-1.87927	0.0723433368308
Ghi_A03G13061.gene	-0.265901	0.028947		Ghi_A03G13061.gene	0.655628	1.08377466722e-09		Ghi_D11G04131.gene	-1.87762	0.201788
Ghi_A03G04806.gene	0.806868	0.000587994094891		Ghi_A03G04806.gene	0.0124994585419	0.962196		Ghi_A08G07121.gene	-1.87634	0.0625559989053
Ghi_A02G08296.gene	0	1		Ghi_A02G08296.gene	0	1		Ghi_A08G00726.gene	-1.87455	0.210213
Ghi_A02G08291.gene	0	1		Ghi_A02G08291.gene	0	1		Ghi_A05G21436.gene	-1.87322	1.34673499677e-05
Ghi_A03G00141.gene	-0.508973	0.00523712653659		Ghi_A03G00141.gene	-0.1194	0.478127		Ghi_D01G06336.gene	-1.8728	0.0357002517489
Ghi_D10G04351.gene	1.90699	9.72011027454e-23		Ghi_D10G04351.gene	0.724152	0.00074308905809		Ghi_D13G12446.gene	-1.8717	0.447468
Ghi_A01G08381.gene	0.928835	0.0193714		Ghi_A01G08381.gene	0.0663026363623	0.887395		Ghi_A07G01521.gene	-1.87169	0.447753
Ghi_A01G08386.gene	0	1		Ghi_A01G08386.gene	0	1		Ghi_D10G09486.gene	-1.87169	0.447753
Ghi_D11G17516.gene	0	1		Ghi_D11G17516.gene	0	1		Ghi_A09G11406.gene	-1.87163	0.449042
Ghi_A01G00156.gene	0.875344	3.19236311056e-23		Ghi_A01G00156.gene	0.0445705449853	0.627523		Ghi_A07G03696.gene	-1.87163	0.449042
Ghi_A01G00151.gene	1.02262	0.802113		Ghi_A01G00151.gene	0	1		Ghi_D07G00456.gene	-1.87163	0.449042
Ghi_D11G17511.gene	0	1		Ghi_D11G17511.gene	0	1		Ghi_D05G10791.gene	-1.87163	0.449042
Ghi_D07G10066.gene	0.136008	0.613003		Ghi_D07G10066.gene	0.0624373083065	0.805961		Ghi_A09G13131.gene	-1.87072	0.0172513746517
Ghi_A12G06456.gene	0.223744	0.281874		Ghi_A12G06456.gene	-0.0230977	0.923665		Ghi_A09G00631.gene	-1.86886	0.636593
Ghi_D09G04361.gene	0	1		Ghi_D09G04361.gene	0	1		Ghi_A06G02706.gene	-1.86886	0.636593
Ghi_A09G06626.gene	0.148466	0.342224		Ghi_A09G06626.gene	-0.0599865	0.6982		Ghi_A12G04561.gene	-1.86886	0.636593
Ghi_D09G04366.gene	0.312963	0.00459788727587		Ghi_D09G04366.gene	0.0371126023782	0.728165		Ghi_A01G04096.gene	-1.86886	0.636593
Ghi_A12G06451.gene	2.27014	0.300517		Ghi_A12G06451.gene	1.92014	0.413726		Ghi_D06G05576.gene	-1.86886	0.636593
Ghi_D03G03536.gene	0	1		Ghi_D03G03536.gene	0.982753	0.809677		Ghi_D01G08091.gene	-1.86886	0.636593
Ghi_D13G06141.gene	-1.80943	0.0117133802998		Ghi_D13G06141.gene	-0.931639	0.127672		Ghi_D12G16356.gene	-1.86886	0.636593
Ghi_A01G11541.gene	0	1		Ghi_A01G11541.gene	0	1		Ghi_D08G12516.gene	-1.86886	0.636593
Ghi_A11G02426.gene	-0.138296	0.286345		Ghi_A11G02426.gene	0.0455085917124	0.724453		Ghi_A06G10741.gene	-1.86886	0.636593
Ghi_D01G09851.gene	0.624739	0.411904		Ghi_D01G09851.gene	0.585889	0.468148		Ghi_D10G06521.gene	-1.86886	0.636593
Ghi_D01G09856.gene	0.16849	0.49105		Ghi_D01G09856.gene	0.0864525202148	0.727307		Ghi_D10G05156.gene	-1.86886	0.636593
Ghi_A11G02421.gene	-0.985142	0.00118195827094		Ghi_A11G02421.gene	-0.12549	0.637814		Ghi_D13G12746.gene	-1.86886	0.636593
Ghi_A01G11546.gene	0.574123	0.291573		Ghi_A01G11546.gene	0.0744323277143	0.893132		Ghi_D06G05081.gene	-1.86886	0.636593
Ghi_D07G02271.gene	-0.19206	0.44969		Ghi_D07G02271.gene	-0.261995	0.263066		Ghi_D05G12821.gene	-1.86886	0.636593
Ghi_D08G14001.gene	-0.90093	0.825256		Ghi_D08G14001.gene	1.50514	0.578268		Ghi_D12G00476.gene	-1.86886	0.636593
Ghi_D13G01871.gene	0.0608423738001	0.987832		Ghi_D13G01871.gene	2.72618	0.172512		Ghi_D11G01031.gene	-1.86886	0.636593
Ghi_D07G10061.gene	0	1		Ghi_D07G10061.gene	0	1		Ghi_A09G12051.gene	-1.86886	0.636593
Ghi_A05G13391.gene	1.02262	0.802113		Ghi_A05G13391.gene	0	1		Ghi_D09G00246.gene	-1.86886	0.636593
Ghi_A07G06301.gene	1.24567	0.0357941730321		Ghi_A07G06301.gene	0.84462	0.158714		Ghi_D08G12811.gene	-1.86886	0.636593
Ghi_A08G05086.gene	0	1		Ghi_A08G05086.gene	0	1		Ghi_A01G04481.gene	-1.86886	0.636593
Ghi_A08G05081.gene	-1.05029	7.93810972566e-13		Ghi_A08G05081.gene	-0.264215	0.0492253		Ghi_D04G04891.gene	-1.86886	0.636593
Ghi_A07G02481.gene	-0.0638109	0.951347		Ghi_A07G02481.gene	0.710031	0.427648		Ghi_A10G10711.gene	-1.86886	0.636593
Ghi_D05G05211.gene	-0.700821	0.693384		Ghi_D05G05211.gene	-0.190665	0.900894		Ghi_A09G05966.gene	-1.86886	0.636593
Ghi_D13G00251.gene	4.1542	0.00146077159282		Ghi_D13G00251.gene	1.34198	0.497701		Ghi_A08G00866.gene	-1.86886	0.636593
Ghi_D05G05216.gene	-1.86328	2.62305857429e-35		Ghi_D05G05216.gene	-0.435949	0.000459668429967		Ghi_D08G06211.gene	-1.86886	0.636593
Ghi_D13G10061.gene	-1.83587	0.215656		Ghi_D13G10061.gene	-2.8838	0.101355		Ghi_A11G10366.gene	-1.86886	0.636593
Ghi_D06G04611.gene	0.439178	0.283674		Ghi_D06G04611.gene	0.119758	0.781858		Ghi_D02G12976.gene	-1.86886	0.636593
Ghi_D02G12736.gene	0	1		Ghi_D02G12736.gene	0	1		Ghi_D05G10781.gene	-1.86886	0.636593
Ghi_A09G06811.gene	-3.45942	0.0148559817064		Ghi_A09G06811.gene	1.03196	0.186746		GhiUnG01921.gene	-1.86886	0.636593
Ghi_A09G06816.gene	0.79606	0.189133		Ghi_A09G06816.gene	0.0791997563674	0.912236		Ghi_D13G01451.gene	-1.86886	0.636593
Ghi_D02G12731.gene	-0.244469	0.231244		Ghi_D02G12731.gene	-0.00149841	0.993447		Ghi_D11G10296.gene	-1.86886	0.636593
Ghi_D06G04616.gene	0	1		Ghi_D06G04616.gene	0	1		Ghi_D01G03281.gene	-1.86886	0.636593
Ghi_A07G02486.gene	-1.00323	0.00826871152915		Ghi_A07G02486.gene	-0.211751	0.480597		Ghi_A05G19206.gene	-1.86886	0.636593
Ghi_A11G13246.gene	0	1		Ghi_A11G13246.gene	0	1		Ghi_D02G10206.gene	-1.86886	0.636593
Ghi_D06G07096.gene	0	1		Ghi_D06G07096.gene	0	1		Ghi_A10G00471.gene	-1.86886	0.636593
Ghi_A01G04721.gene	0	1		Ghi_A01G04721.gene	0	1		Ghi_D02G10046.gene	-1.86886	0.636593
Ghi_A01G04726.gene	-0.340916	0.525271		Ghi_A01G04726.gene	0.660268	0.135992		GhiUnG02811.gene	-1.86886	0.636593
Ghi_A07G06306.gene	-0.824182	0.0331567359508		Ghi_A07G06306.gene	-0.0927652	0.787663		Ghi_A06G07911.gene	-1.86886	0.636593
Ghi_D06G07091.gene	0.0580425	0.726778		Ghi_D06G07091.gene	-0.0818211	0.625545		Ghi_A12G11351.gene	-1.86886	0.636593
Ghi_A11G13241.gene	0	1		Ghi_A11G13241.gene	0	1		Ghi_D06G02141.gene	-1.86886	0.636593
Ghi_D05G06751.gene	0.332216	0.13117		Ghi_D05G06751.gene	0.119198	0.585383		Ghi_A03G08361.gene	-1.86886	0.636593
Ghi_A10G04801.gene	-0.816009	4.62158458687e-11		Ghi_A10G04801.gene	-0.561582	7.02004268674e-07		Ghi_A05G23956.gene	-1.86886	0.636593
Ghi_D02G01326.gene	0	1		Ghi_D02G01326.gene	0	1		Ghi_A02G08706.gene	-1.86886	0.636593
Ghi_A11G12591.gene	1.07047	2.33199120885e-11		Ghi_A11G12591.gene	-0.152919	0.421293		Ghi_D01G10831.gene	-1.86886	0.636593
Ghi_D06G01551.gene	0.542652	7.92770148116e-06		Ghi_D06G01551.gene	0.129432	0.320404		Ghi_D01G03416.gene	-1.86886	0.636593
Ghi_D08G05806.gene	0	1		Ghi_D08G05806.gene	0	1		Ghi_A13G07326.gene	-1.86886	0.636593
Ghi_A01G03711.gene	0	1		Ghi_A01G03711.gene	0	1		Ghi_A05G24001.gene	-1.86886	0.636593
Ghi_A01G03716.gene	0	1		Ghi_A01G03716.gene	0	1		Ghi_A11G02846.gene	-1.86886	0.636593
Ghi_D08G05801.gene	1.02689	0.000391233972557		Ghi_D08G05801.gene	0.0103654296809	0.975428		Ghi_A11G00786.gene	-1.86886	0.636593
Ghi_D06G01556.gene	0.618521	0.000647026798961		Ghi_D06G01556.gene	0.273821	0.131457		Ghi_A13G12176.gene	-1.86886	0.636593
Ghi_A11G12596.gene	2.51844	0.446084		Ghi_A11G12596.gene	1.88234	0.641056		Ghi_A05G23946.gene	-1.86886	0.636593
Ghi_D11G10981.gene	0	1		Ghi_D11G10981.gene	0	1		Ghi_D06G10241.gene	-1.86886	0.636593
Ghi_D11G10986.gene	-0.0168106	0.879904		Ghi_D11G10986.gene	-0.118373	0.264481		Ghi_A02G02241.gene	-1.86886	0.636593
Ghi_A04G07501.gene	-2.83862	0.14206		Ghi_A04G07501.gene	0.83175	0.46152		Ghi_A10G09431.gene	-1.86886	0.636593
Ghi_D11G09501.gene	-3.10495	2.63651694825e-123		Ghi_D11G09501.gene	-0.840352	9.40358285688e-21		Ghi_D07G10906.gene	-1.86886	0.636593
Ghi_D05G03291.gene	-1.89542	0.000279462657927		Ghi_D05G03291.gene	0.284999	0.413573		Ghi_A01G03176.gene	-1.86886	0.636593
Ghi_D01G07461.gene	0	1		Ghi_D01G07461.gene	0	1		Ghi_A13G05896.gene	-1.86886	0.636593
Ghi_A04G07506.gene	-0.908928	2.89985779461e-09		Ghi_A04G07506.gene	-0.192538	0.167048		Ghi_D12G08621.gene	-1.86886	0.636593
Ghi_A06G06211.gene	-0.230503	0.176467		Ghi_A06G06211.gene	-0.39796	0.0258082742874		Ghi_D08G02211.gene	-1.86886	0.636593
Ghi_A10G09566.gene	1.92082	2.90062122179e-35		Ghi_A10G09566.gene	0.593304	9.44434572954e-05		Ghi_A12G08201.gene	-1.86886	0.636593
Ghi_A10G09561.gene	0.0308969241728	0.803388		Ghi_A10G09561.gene	-0.238667	0.0736904		Ghi_D10G09806.gene	-1.86886	0.636593
Ghi_A06G06216.gene	-1.91968	1.44714990044e-05		Ghi_A06G06216.gene	-1.05959	0.00229507312211		Ghi_D02G01846.gene	-1.86886	0.636593
Ghi_D01G07466.gene	-0.345958	0.0763182300335		Ghi_D01G07466.gene	-0.023593	0.888003		Ghi_A01G09066.gene	-1.86886	0.636593
Ghi_D06G01261.gene	-0.155531	0.352114		Ghi_D06G01261.gene	-0.151667	0.369595		Ghi_D11G12521.gene	-1.86886	0.636593
Ghi_D03G08476.gene	0.697134	3.07382645376e-07		Ghi_D03G08476.gene	0.0665109517375	0.61328		Ghi_D08G06361.gene	-1.86886	0.636593
Ghi_D13G06151.gene	-0.437876	0.194774		Ghi_D13G06151.gene	-0.404574	0.270203		Ghi_D08G05956.gene	-1.86886	0.636593
Ghi_D06G01266.gene	1.84186	1.14133966392e-46		Ghi_D06G01266.gene	0.261478	0.0435921043954		Ghi_A02G00521.gene	-1.86886	0.636593
Ghi_D10G00381.gene	-0.735853	0.00751867446078		Ghi_D10G00381.gene	-0.34471	0.175142		Ghi_A09G00656.gene	-1.86886	0.636593
Ghi_D10G00386.gene	1.02262	0.802113		Ghi_D10G00386.gene	1.88744	0.615622		Ghi_A09G11311.gene	-1.86886	0.636593
Ghi_D03G05201.gene	-0.0346584	0.812173		Ghi_D03G05201.gene	0.32068	0.0127541880165		Ghi_A06G02156.gene	-1.86886	0.636593
Ghi_D10G09866.gene	0	1		Ghi_D10G09866.gene	0	1		Ghi_A13G11121.gene	-1.86886	0.636593
Ghi_D10G09861.gene	-2.31307	4.84921965893e-09		Ghi_D10G09861.gene	-0.356112	0.208543		Ghi_D05G13031.gene	-1.86886	0.636593
Ghi_A10G12941.gene	2.48647	0.455667		Ghi_A10G12941.gene	2.46719	0.441647		Ghi_A07G03561.gene	-1.86886	0.636593
Ghi_D03G05206.gene	-3.25885	0.0214163192161		Ghi_D03G05206.gene	0.450577	0.547905		Ghi_A09G12506.gene	-1.86886	0.636593
Ghi_D10G04891.gene	-0.662741	0.0821653352449		Ghi_D10G04891.gene	-0.0519918	0.879779		Ghi_D05G05156.gene	-1.86886	0.636593
Ghi_A03G00146.gene	-1.87593	1.44030832534e-11		Ghi_A03G00146.gene	-1.03695	3.95230292704e-05		Ghi_D12G12656.gene	-1.86886	0.636593
Ghi_D10G04896.gene	-0.523464	0.108415		Ghi_D10G04896.gene	-0.73182	0.0286942929864		Ghi_A11G01271.gene	-1.86886	0.636593
Ghi_A11G17786.gene	0.123488	0.639549		Ghi_A11G17786.gene	0.157362	0.510422		Ghi_A13G12761.gene	-1.86886	0.636593
Ghi_A02G02141.gene	1.04669	0.63786		Ghi_A02G02141.gene	-1.84052	0.626863		Ghi_A03G02656.gene	-1.86698	0.0567050130494
Ghi_A06G04506.gene	-1.58796	0.0783305765118		Ghi_A06G04506.gene	-1.51934	0.0718545930458		Ghi_A06G09341.gene	-1.86627	0.606853
Ghi_A10G03221.gene	-0.0328603	0.847003		Ghi_A10G03221.gene	-0.100003	0.571499		Ghi_A03G01111.gene	-1.86627	0.606853
Ghi_D12G13661.gene	-2.62735	8.00537484914e-35		Ghi_D12G13661.gene	-0.0315337	0.726656		Ghi_D03G10031.gene	-1.86627	0.606853
Ghi_D12G13666.gene	-0.561609	0.810319		Ghi_D12G13666.gene	-1.5624	0.479067		Ghi_A02G04701.gene	-1.86627	0.606853
Ghi_A10G03226.gene	1.02262	0.802113		Ghi_A10G03226.gene	0	1		Ghi_D05G12111.gene	-1.86627	0.606853
Ghi_D10G08406.gene	-1.60882	9.26868225262e-06		Ghi_D10G08406.gene	0.14184	0.621353		Ghi_D01G02076.gene	-1.86627	0.606853
Ghi_D07G12676.gene	-0.535013	0.00937212355508		Ghi_D07G12676.gene	-0.173164	0.359166		Ghi_A13G04606.gene	-1.86627	0.606853
Ghi_A12G11736.gene	1.02262	0.802113		Ghi_A12G11736.gene	0.982753	0.809677		Ghi_D13G05861.gene	-1.86627	0.606853
Ghi_A11G18256.gene	0.30383	0.195075		Ghi_A11G18256.gene	0.290866	0.186858		Ghi_D01G08566.gene	-1.86627	0.606853
Ghi_D09G05391.gene	-0.385896	0.352001		Ghi_D09G05391.gene	-0.257147	0.534911		GhiUnG00181.gene	-1.86627	0.606853
Ghi_D10G00651.gene	0.739034	0.000228234184442		Ghi_D10G00651.gene	0.122236	0.588625		Ghi_A11G16846.gene	-1.86627	0.606853
Ghi_D04G03271.gene	-2.6794	0.000358990448729		Ghi_D04G03271.gene	0.881083	0.0300990227317		Ghi_D05G02466.gene	-1.86627	0.606853
Ghi_A06G00326.gene	0.940132	0.000608021979928		Ghi_A06G00326.gene	0.370944	0.1762		Ghi_A05G17611.gene	-1.86627	0.606853
Ghi_D07G10616.gene	0	1		Ghi_D07G10616.gene	0	1		Ghi_D12G04186.gene	-1.86627	0.606853
Ghi_D10G00656.gene	0.195724	0.702499		Ghi_D10G00656.gene	-0.471234	0.388251		Ghi_A12G03906.gene	-1.86627	0.606853
Ghi_A06G00321.gene	0.049686	0.731582		Ghi_A06G00321.gene	-0.92363	1.3148061289e-09		Ghi_A05G09226.gene	-1.86627	0.606853
Ghi_A03G11966.gene	-0.125225	0.532091		Ghi_A03G11966.gene	-0.301696	0.162969		Ghi_A06G09251.gene	-1.86627	0.606853
Ghi_A03G11961.gene	-0.241788	0.361733		Ghi_A03G11961.gene	-0.0246163	0.920913		Ghi_D07G08221.gene	-1.86627	0.606853
Ghi_D10G04761.gene	-0.277834	0.569214		Ghi_D10G04761.gene	-0.189575	0.702301		Ghi_D01G09456.gene	-1.86627	0.606853
Ghi_D06G09726.gene	1.64537	0.168901		Ghi_D06G09726.gene	0.898903	0.537474		Ghi_A11G15456.gene	-1.86627	0.606853
Ghi_A05G24076.gene	-1.47103	0.109925		Ghi_A05G24076.gene	-0.774124	0.366888		Ghi_A13G04626.gene	-1.86627	0.606853
Ghi_A05G24071.gene	-2.70179	0.000130332505481		Ghi_A05G24071.gene	-1.22941	0.202322		Ghi_D11G04726.gene	-1.86627	0.606853
Ghi_D06G09721.gene	-0.980844	7.29444834961e-07		Ghi_D06G09721.gene	-0.155792	0.373214		Ghi_A05G03726.gene	-1.86627	0.606853
Ghi_D10G04766.gene	0	1		Ghi_D10G04766.gene	4.19377	0.0316466226873		Ghi_A09G01551.gene	-1.86627	0.606853
Ghi_A04G07891.gene	-2.30493	0.00540781625823		Ghi_A04G07891.gene	1.15903	0.0187596451841		Ghi_A12G09881.gene	-1.86627	0.606853
Ghi_D06G03341.gene	0	1		Ghi_D06G03341.gene	0	1		Ghi_A01G00416.gene	-1.86627	0.606853
Ghi_A11G04861.gene	-2.52321	0.00991632262678		Ghi_A11G04861.gene	-1.90101	0.0270277506267		Ghi_D08G07656.gene	-1.86627	0.606853
Ghi_A11G04866.gene	1.46666	5.80308502755e-37		Ghi_A11G04866.gene	0.446308	0.000308413672335		Ghi_A05G20471.gene	-1.86627	0.606853
Ghi_D06G03346.gene	0.540558	0.00253375217156		Ghi_D06G03346.gene	-0.175198	0.390158		Ghi_A02G02881.gene	-1.86627	0.606853
Ghi_D07G06596.gene	-0.90093	0.825256		Ghi_D07G06596.gene	0.0209819248873	0.995615		Ghi_A12G14846.gene	-1.86627	0.606853
Ghi_A13G14366.gene	0.0876847199422	0.511748		Ghi_A13G14366.gene	-0.810348	6.62684814642e-16		Ghi_A12G13716.gene	-1.86627	0.606853
Ghi_D09G08746.gene	-1.78975	2.52336083441e-09		Ghi_D09G08746.gene	-1.23512	1.73588718718e-05		Ghi_A04G04361.gene	-1.86627	0.606853
Ghi_D06G04781.gene	-0.0930738	0.878468		Ghi_D06G04781.gene	0.189633	0.733167		Ghi_D04G10876.gene	-1.86627	0.606853
Ghi_A13G14361.gene	0	1		Ghi_A13G14361.gene	0	1		Ghi_A06G12951.gene	-1.86627	0.606853
Ghi_D13G11841.gene	-1.96166	9.23571383675e-64		Ghi_D13G11841.gene	-0.645058	1.29835340443e-10		Ghi_D11G08931.gene	-1.86627	0.606853
Ghi_A01G09416.gene	1.02262	0.802113		Ghi_A01G09416.gene	0	1		Ghi_D05G11571.gene	-1.86627	0.606853
Ghi_A01G02446.gene	0	1		Ghi_A01G02446.gene	0	1		Ghi_D03G00046.gene	-1.86627	0.606853
Ghi_A01G02441.gene	0	1		Ghi_A01G02441.gene	0	1		Ghi_A13G10916.gene	-1.86627	0.606853
Ghi_A01G09411.gene	0.25664	0.29696		Ghi_A01G09411.gene	0.120666	0.635452		Ghi_A02G10081.gene	-1.86627	0.606853
Ghi_D13G11846.gene	0	1		Ghi_D13G11846.gene	0	1		Ghi_D11G04456.gene	-1.86627	0.606853
Ghi_A06G03196.gene	0	1		Ghi_A06G03196.gene	0	1		Ghi_A05G17196.gene	-1.86627	0.606853
Ghi_A09G07071.gene	-1.46192	0.221184		Ghi_A09G07071.gene	-1.48003	0.19367		Ghi_D04G02001.gene	-1.86627	0.606853
Ghi_A11G03486.gene	0.228306	0.396073		Ghi_A11G03486.gene	0.275636	0.311959		Ghi_A01G01781.gene	-1.86627	0.606853
Ghi_A11G03481.gene	-0.634763	0.111539		Ghi_A11G03481.gene	-0.0535418	0.886642		Ghi_A09G12776.gene	-1.86627	0.606853
Ghi_A09G07076.gene	-3.20518	0.000960001420857		Ghi_A09G07076.gene	-1.2461	0.0911561511798		Ghi_D05G07706.gene	-1.86627	0.606853
Ghi_A06G03191.gene	0.00668709351978	0.970854		Ghi_A06G03191.gene	-0.211684	0.253911		Ghi_A05G11616.gene	-1.86627	0.606853
Ghi_A10G04961.gene	0.127699	0.74292		Ghi_A10G04961.gene	0.581426	0.116792		Ghi_A12G04011.gene	-1.86627	0.606853
Ghi_A04G02971.gene	-0.221299	0.0751356549364		Ghi_A04G02971.gene	-0.231958	0.0513228495303		Ghi_D08G11671.gene	-1.86627	0.606853
Ghi_A04G06411.gene	-3.70997	7.09982306579e-08		Ghi_A04G06411.gene	-1.07031	0.0125848272864		Ghi_A03G04551.gene	-1.86627	0.606853
Ghi_A13G11866.gene	0.615683	0.00360038951196		Ghi_A13G11866.gene	0.249278	0.239979		Ghi_A01G09386.gene	-1.86627	0.606853
Ghi_A04G06416.gene	-2.04856	4.00233298573e-07		Ghi_A04G06416.gene	0.478864	0.0907293		GhiUnG02446.gene	-1.86627	0.606853
Ghi_A04G02976.gene	0.292806	0.00498904718782		Ghi_A04G02976.gene	0.105421	0.318508		Ghi_D08G13401.gene	-1.86627	0.606853
Ghi_D08G10806.gene	0	1		Ghi_D08G10806.gene	0.982753	0.809677		Ghi_A05G21881.gene	-1.86627	0.606853
Ghi_A09G03941.gene	0	1		Ghi_A09G03941.gene	0	1		Ghi_D11G17496.gene	-1.86627	0.606853
Ghi_A11G16901.gene	0	1		Ghi_A11G16901.gene	0	1		Ghi_A05G06536.gene	-1.86627	0.606853
Ghi_A11G16906.gene	-0.708879	0.190958		Ghi_A11G16906.gene	0.334354	0.463925		Ghi_A11G06356.gene	-1.86627	0.606853
Ghi_A09G03946.gene	0.40496	0.45169		Ghi_A09G03946.gene	0.189671	0.69168		Ghi_A12G05106.gene	-1.86627	0.606853
Ghi_D08G10801.gene	-0.90093	0.825256		Ghi_D08G10801.gene	-0.9408	0.817655		Ghi_A06G01846.gene	-1.86627	0.606853
Ghi_D05G01246.gene	-2.01324	6.54037234051e-06		Ghi_D05G01246.gene	0.635301	0.0312267843544		Ghi_A12G03361.gene	-1.86627	0.606853
Ghi_D05G01241.gene	0.882407	1.57394354546e-05		Ghi_D05G01241.gene	-0.204292	0.428285		Ghi_D06G04476.gene	-1.86601	4.28394659897e-13
Ghi_D13G10741.gene	-1.44069	4.0329251367e-30		Ghi_D13G10741.gene	-0.472865	5.4707297157e-05		Ghi_D04G09816.gene	-1.86313	0.0611124027929
Ghi_A08G09881.gene	3.23727	1.28043527769e-11		Ghi_A08G09881.gene	1.07606	0.0863906645972		Ghi_D11G09571.gene	-1.86163	0.0633409841145
Ghi_A02G03816.gene	1.93413	0.207556		Ghi_A02G03816.gene	1.595	0.306542		Ghi_D06G03391.gene	-1.8596	0.319056
Ghi_D07G09816.gene	0.326244	0.0304003449648		Ghi_D07G09816.gene	0.11206	0.456895		Ghi_D06G04761.gene	-1.85805	0.483952
Ghi_D08G07401.gene	0	1		Ghi_D08G07401.gene	0	1		Ghi_D03G10061.gene	-1.85803	0.484249
Ghi_D08G07406.gene	-0.90093	0.825256		Ghi_D08G07406.gene	1.49214	0.583591		Ghi_A05G15391.gene	-1.85803	0.484249
Ghi_A09G01896.gene	-0.281509	0.501005		Ghi_A09G01896.gene	0.0406260776555	0.917765		Ghi_D05G05941.gene	-1.85797	0.485597
Ghi_A10G04966.gene	0	1		Ghi_A10G04966.gene	0	1		Ghi_A11G10456.gene	-1.85797	0.485597
Ghi_A08G09886.gene	0.228016	0.123761		Ghi_A08G09886.gene	-0.276472	0.0739471		Ghi_D13G05146.gene	-1.85797	0.485597
Ghi_A11G12626.gene	0.0076312025688	0.952921		Ghi_A11G12626.gene	0.277178	0.0260924089571		Ghi_D08G02231.gene	-1.85566	6.05284578193e-37
Ghi_D12G02226.gene	-1.24873	3.69158658084e-05		Ghi_D12G02226.gene	-0.093588	0.720032		Ghi_D10G09701.gene	-1.85251	0.111225
Ghi_A07G01311.gene	1.06715	3.86291014532e-16		Ghi_A07G01311.gene	0.331578	0.0173708194051		Ghi_D07G05216.gene	-1.85191	9.85431486264e-35
Ghi_A07G01316.gene	-0.392828	0.0159173379005		Ghi_A07G01316.gene	0.206384	0.15803		Ghi_A05G12751.gene	-1.85157	0.298296
Ghi_D12G02221.gene	1.02262	0.802113		Ghi_D12G02221.gene	0	1		Ghi_A02G04201.gene	-1.85058	0.214939
Ghi_A11G12621.gene	0.11951	0.38267		Ghi_A11G12621.gene	-0.00422842	0.974253		Ghi_A06G12836.gene	-1.84959	1.2072199822e-05
Ghi_A07G00046.gene	0	1		Ghi_A07G00046.gene	0	1		Ghi_A06G06236.gene	-1.8464	3.26874900124e-05
Ghi_A07G00041.gene	-0.20892	0.14268		Ghi_A07G00041.gene	-0.0980016	0.48417		Ghi_D05G03091.gene	-1.84423	0.6136
Ghi_A02G00871.gene	0.492856	0.00133435635064		Ghi_A02G00871.gene	0.176611	0.259816		Ghi_A09G03046.gene	-1.84423	0.6136
Ghi_A09G08576.gene	1.91608	0.635135		Ghi_A09G08576.gene	0.982753	0.809677		Ghi_D01G02361.gene	-1.84423	0.6136
Ghi_D07G02416.gene	-0.226655	0.202466		Ghi_D07G02416.gene	0.118127	0.458083		Ghi_D07G03031.gene	-1.84423	0.6136
Ghi_A09G08571.gene	-0.101845	0.653715		Ghi_A09G08571.gene	0.0271808479037	0.898826		Ghi_D07G10861.gene	-1.84423	0.6136
Ghi_A02G00876.gene	0	1		Ghi_A02G00876.gene	0	1		Ghi_A05G10121.gene	-1.84423	0.6136
Ghi_D10G05381.gene	0	1		Ghi_D10G05381.gene	0	1		Ghi_D02G10891.gene	-1.84423	0.6136
Ghi_A05G09281.gene	-1.318	2.1750493931e-06		Ghi_A05G09281.gene	1.4453	7.44401396237e-17		Ghi_A11G14246.gene	-1.84423	0.6136
Ghi_A05G09286.gene	0	1		Ghi_A05G09286.gene	0	1		Ghi_D06G03666.gene	-1.84423	0.6136
Ghi_D10G05386.gene	0	1		Ghi_D10G05386.gene	0	1		Ghi_A08G15056.gene	-1.84423	0.6136
Ghi_A09G03491.gene	0	1		Ghi_A09G03491.gene	0	1		Ghi_D08G07381.gene	-1.84423	0.6136
Ghi_A10G02571.gene	1.92051	0.620023		Ghi_A10G02571.gene	2.47811	0.484014		Ghi_D09G08751.gene	-1.84423	0.6136
Ghi_D06G02761.gene	-1.44517	2.84610552139e-11		Ghi_D06G02761.gene	-0.350919	0.0553508889082		Ghi_D11G05921.gene	-1.84423	0.6136
Ghi_D02G09316.gene	-1.59552	7.97668309894e-36		Ghi_D02G09316.gene	-0.441736	6.24281015826e-05		GhiUnG02966.gene	-1.84423	0.6136
Ghi_A10G02576.gene	-0.16819	0.111688		Ghi_A10G02576.gene	0.0385083906618	0.706872		Ghi_A02G09996.gene	-1.84423	0.6136
Ghi_A03G00066.gene	0.211546	0.805356		Ghi_A03G00066.gene	0.936029	0.205949		Ghi_D04G07001.gene	-1.84423	0.6136
Ghi_A09G03496.gene	1.15038	0.249272		Ghi_A09G03496.gene	1.01656	0.313602		Ghi_D03G04561.gene	-1.84423	0.6136
Ghi_A05G11821.gene	0.763706	1.88643457118e-05		Ghi_A05G11821.gene	-0.0331476	0.866561		Ghi_A11G04126.gene	-1.84423	0.6136
Ghi_A11G04286.gene	0	1		Ghi_A11G04286.gene	2.46719	0.441647		Ghi_D11G01241.gene	-1.84423	0.6136
Ghi_A04G03596.gene	-0.90093	0.825256		Ghi_A04G03596.gene	-0.9408	0.817655		Ghi_A10G02786.gene	-1.84423	0.6136
Ghi_A04G03591.gene	0	1		Ghi_A04G03591.gene	0	1		Ghi_A06G03446.gene	-1.84423	0.6136
Ghi_A11G04281.gene	-3.81363	0.0770388314187		Ghi_A11G04281.gene	-1.4088	0.420471		Ghi_A08G07466.gene	-1.84423	0.6136
Ghi_A13G00666.gene	-1.33692	0.420176		Ghi_A13G00666.gene	-1.97007	0.29003		Ghi_A05G21666.gene	-1.84423	0.6136
Ghi_D12G15626.gene	1.60638	1.17907491709e-12		Ghi_D12G15626.gene	0.350802	0.215932		Ghi_D10G13506.gene	-1.84423	0.6136
GhiUnG02411.gene	0	1		GhiUnG02411.gene	0	1		Ghi_A08G06946.gene	-1.84423	0.6136
Ghi_A08G04701.gene	0	1		Ghi_A08G04701.gene	0	1		Ghi_A03G05161.gene	-1.84423	0.6136
Ghi_A06G02821.gene	-0.0114417	0.928925		Ghi_A06G02821.gene	0.353764	0.00412422551327		Ghi_A11G12101.gene	-1.84423	0.6136
Ghi_A11G18196.gene	-0.0620881	0.940501		Ghi_A11G18196.gene	-0.718172	0.434769		Ghi_D07G06971.gene	-1.84423	0.6136
Ghi_D07G08891.gene	0	1		Ghi_D07G08891.gene	0	1		Ghi_A10G01221.gene	-1.84423	0.6136
Ghi_A06G02826.gene	0.476719	0.00195006240804		Ghi_A06G02826.gene	0.285022	0.0585296244456		Ghi_A07G05556.gene	-1.84423	0.6136
Ghi_A07G00591.gene	-0.246634	0.201301		Ghi_A07G00591.gene	-0.0757839	0.568		Ghi_D11G14466.gene	-1.84423	0.6136
Ghi_A07G00596.gene	0.526206	0.611631		Ghi_A07G00596.gene	-0.118392	0.91516		Ghi_A12G04481.gene	-1.84423	0.6136
Ghi_A05G09131.gene	-0.168493	0.230993		Ghi_A05G09131.gene	0.364362	0.00376218587133		Ghi_D04G04591.gene	-1.84423	0.6136
Ghi_A05G09136.gene	0.345815	0.00321487352739		Ghi_A05G09136.gene	0.150794	0.217067		Ghi_A13G09681.gene	-1.84423	0.6136
Ghi_D07G08896.gene	0.0608423	0.987792		Ghi_D07G08896.gene	-0.9408	0.817655		Ghi_D01G09866.gene	-1.84423	0.6136
Ghi_A02G06331.gene	-2.09868	0.0957995533305		Ghi_A02G06331.gene	-0.556034	0.574758		Ghi_A12G01476.gene	-1.84423	0.6136
Ghi_D04G03941.gene	0	1		Ghi_D04G03941.gene	0	1		Ghi_A11G06856.gene	-1.84423	0.6136
Ghi_A13G02906.gene	-0.0492038	0.74428		Ghi_A13G02906.gene	0.00830947616773	0.954591		Ghi_D09G04721.gene	-1.84423	0.6136
Ghi_A13G02901.gene	0.138223	0.231409		Ghi_A13G02901.gene	-0.42888	0.000376401552348		Ghi_D01G03736.gene	-1.84423	0.6136
GhiUnG02416.gene	0.649912	0.780849		GhiUnG02416.gene	0.00286718514149	0.999105		Ghi_D06G11196.gene	-1.84423	0.6136
Ghi_A02G06336.gene	0.125782	0.795067		Ghi_A02G06336.gene	-0.798885	0.0807822113047		Ghi_A11G13451.gene	-1.84423	0.6136
Ghi_A03G11036.gene	1.22782	0.224366		Ghi_A03G11036.gene	0.188354	0.878442		Ghi_A10G10351.gene	-1.84423	0.6136
Ghi_A04G01991.gene	0	1		Ghi_A04G01991.gene	0.982753	0.809677		Ghi_D01G10611.gene	-1.84423	0.6136
Ghi_A13G00661.gene	-1.6123	3.81991590657e-36		Ghi_A13G00661.gene	-0.416576	2.26832088639e-05		Ghi_A13G11896.gene	-1.84423	0.6136
Ghi_A04G01996.gene	-1.10857	0.000516512283499		Ghi_A04G01996.gene	0.737872	0.0010886311122		Ghi_D10G10551.gene	-1.84423	0.6136
Ghi_A03G11031.gene	1.04588	0.00496311563197		Ghi_A03G11031.gene	0.581207	0.109513		Ghi_D07G13106.gene	-1.84423	0.6136
Ghi_D06G10466.gene	0.0960819318789	0.618417		Ghi_D06G10466.gene	0.0936135456771	0.618736		Ghi_D04G05271.gene	-1.84423	0.6136
Ghi_A11G04136.gene	-0.213057	0.0428822605943		Ghi_A11G04136.gene	-0.122938	0.238018		Ghi_D04G06291.gene	-1.84423	0.6136
Ghi_A09G06381.gene	1.98053	1.56223062178e-05		Ghi_A09G06381.gene	0.779325	0.115457		Ghi_A13G02961.gene	-1.84423	0.6136
Ghi_A09G06386.gene	0	1		Ghi_A09G06386.gene	0	1		Ghi_D12G13006.gene	-1.84423	0.6136
Ghi_A11G04131.gene	-1.42664	2.95120233541e-05		Ghi_A11G04131.gene	-0.361186	0.240591		Ghi_A12G11061.gene	-1.84423	0.6136
Ghi_D06G10461.gene	0.173271	0.231383		Ghi_D06G10461.gene	-0.0462825	0.748324		Ghi_D07G07021.gene	-1.84423	0.6136
Ghi_D05G02606.gene	-0.642671	1.49465628171e-05		Ghi_D05G02606.gene	0.599752	3.4241573229e-06		Ghi_A05G20546.gene	-1.84423	0.6136
Ghi_A01G00666.gene	0	1		Ghi_A01G00666.gene	0	1		Ghi_D05G13886.gene	-1.84423	0.6136
Ghi_A04G03621.gene	0	1		Ghi_A04G03621.gene	0	1		Ghi_D11G17061.gene	-1.84423	0.6136
Ghi_D08G02046.gene	-0.926272	0.153533		Ghi_D08G02046.gene	1.38086	0.000215583645935		Ghi_D01G01181.gene	-1.84423	0.6136
Ghi_D08G02041.gene	-0.354303	0.0822968614403		Ghi_D08G02041.gene	0.796722	0.0211781521229		Ghi_A13G01576.gene	-1.84423	0.6136
Ghi_A04G03626.gene	0	1		Ghi_A04G03626.gene	0	1		Ghi_A07G00686.gene	-1.84423	0.6136
Ghi_D05G02601.gene	0.644455	0.783993		Ghi_D05G02601.gene	-1.81779	0.633521		Ghi_A01G11876.gene	-1.84423	0.6136
Ghi_A10G10956.gene	0.362134	0.000382187085517		Ghi_A10G10956.gene	0.0610577323525	0.578496		Ghi_A11G18311.gene	-1.84423	0.6136
Ghi_D05G06736.gene	0.0608422	0.987717		Ghi_D05G06736.gene	0.0209820752121	0.995585		Ghi_D13G07881.gene	-1.84299	2.99406849888e-14
Ghi_D01G01501.gene	0.327783	0.105646		Ghi_D01G01501.gene	0.181262	0.375257		Ghi_A06G01066.gene	-1.84266	0.330595
Ghi_D04G05396.gene	0.0448118721195	0.890141		Ghi_D04G05396.gene	-0.154996	0.635621		Ghi_D11G05661.gene	-1.84152	0.0279049390943
Ghi_D08G06756.gene	0	1		Ghi_D08G06756.gene	0	1		Ghi_D04G02371.gene	-1.8412	3.39200064507e-05
Ghi_D08G06751.gene	0.253961	0.558115		Ghi_D08G06751.gene	-0.0032731	0.994004		Ghi_A11G11961.gene	-1.84071	0.323065
Ghi_D04G05391.gene	0.19301	0.359663		Ghi_D04G05391.gene	0.187977	0.392099		Ghi_D07G01301.gene	-1.84033	0.0361634938467
Ghi_D01G01506.gene	0.885564	5.37590542334e-05		Ghi_D01G01506.gene	0.928905	3.68015776511e-06		Ghi_A07G06186.gene	-1.83834	0.115612
Ghi_D05G06731.gene	0	1		Ghi_D05G06731.gene	0	1		Ghi_A13G04811.gene	-1.83822	0.332076
Ghi_D10G05966.gene	1.14736	2.93693268648e-27		Ghi_D10G05966.gene	0.0317145460327	0.802111		Ghi_D01G04156.gene	-1.83616	0.00196109431342
Ghi_D10G05961.gene	0	1		Ghi_D10G05961.gene	0	1		Ghi_D02G03386.gene	-1.83226	0.30713
Ghi_A08G06971.gene	-0.227309	0.236567		Ghi_A08G06971.gene	0.190997	0.280958		Ghi_D07G12136.gene	-1.8307	0.308085
Ghi_A11G05421.gene	-0.00836065	0.960669		Ghi_A11G05421.gene	0.0649953	0.693921		Ghi_D08G04211.gene	-1.83055	5.56059436057e-33
Ghi_D04G04446.gene	0	1		Ghi_D04G04446.gene	0	1		Ghi_D10G03636.gene	-1.82975	0.301614
Ghi_A09G03236.gene	-1.26268	0.357594		Ghi_A09G03236.gene	0.399919	0.70508		Ghi_A07G10951.gene	-1.8291	0.326929
Ghi_A09G03231.gene	-0.156366	0.817879		Ghi_A09G03231.gene	1.36079	0.0041138851486		Ghi_D11G08321.gene	-1.82853	0.329309
Ghi_A03G02456.gene	-1.90042	3.51544481584e-21		Ghi_A03G02456.gene	-0.727045	3.03847753744e-05		Ghi_D05G10406.gene	-1.82853	0.329309
Ghi_D04G04441.gene	0.875052	0.457132		Ghi_D04G04441.gene	1.02799	0.367791		Ghi_D13G09011.gene	-1.82373	5.35004420539e-12
Ghi_A11G05426.gene	-0.82444	3.96196439869e-07		Ghi_A11G05426.gene	0.186106	0.173204		Ghi_D11G06106.gene	-1.82268	0.331266
Ghi_A05G12826.gene	4.43955	0.000971464527436		Ghi_A05G12826.gene	1.02995	0.620264		Ghi_A09G03881.gene	-1.8221	0.0166978854835
Ghi_A04G01666.gene	-3.36401	0.19979		Ghi_A04G01666.gene	-0.537747	0.762394		Ghi_D05G09366.gene	-1.82166	1.11617960888e-08
Ghi_A11G09731.gene	0.0457236	0.978095		Ghi_A11G09731.gene	-0.193788	0.89842		Ghi_A11G03896.gene	-1.82088	0.30409
Ghi_A09G06031.gene	1.04928	0.590737		Ghi_A09G06031.gene	1.61942	0.309591		Ghi_A12G12746.gene	-1.82053	0.325477
Ghi_A13G04426.gene	0	1		Ghi_A13G04426.gene	0.982753	0.809677		Ghi_A06G02361.gene	-1.82026	0.308913
Ghi_A13G04421.gene	-1.33277	0.121204		Ghi_A13G04421.gene	0.345018	0.573608		Ghi_A06G12416.gene	-1.81871	0.312013
Ghi_A09G06036.gene	2.26437	6.80263752911e-06		Ghi_A09G06036.gene	1.10293	0.0644624246371		Ghi_D12G04381.gene	-1.81833	0.00443862762201
Ghi_A11G09736.gene	-0.169738	0.0741196630215		Ghi_A11G09736.gene	0.202921	0.0345701718081		Ghi_A05G04566.gene	-1.81802	0.149495
Ghi_D02G03016.gene	-0.90093	0.825256		Ghi_D02G03016.gene	0.0209818436177	0.99563		Ghi_A09G08066.gene	-1.8179	0.305497
Ghi_D12G15086.gene	0	1		Ghi_D12G15086.gene	0	1		Ghi_D06G09441.gene	-1.81772	0.651222
Ghi_D01G09086.gene	-0.439686	0.690731		Ghi_D01G09086.gene	0.0109809257122	0.9914		Ghi_D01G04956.gene	-1.81772	0.651222
Ghi_D01G09081.gene	0.0260508532976	0.823192		Ghi_D01G09081.gene	-0.157983	0.162974		Ghi_D06G00761.gene	-1.81772	0.651222
Ghi_A08G06976.gene	1.51185	0.151955		Ghi_A08G06976.gene	0.537422	0.664498		Ghi_A08G06956.gene	-1.81772	0.651222
Ghi_D02G03011.gene	-0.166737	0.917057		Ghi_D02G03011.gene	-0.202366	0.888267		Ghi_D05G02431.gene	-1.81772	0.651222
Ghi_A04G04011.gene	0	1		Ghi_A04G04011.gene	0	1		Ghi_D05G02866.gene	-1.81772	0.651222
Ghi_A09G02721.gene	-0.90093	0.825256		Ghi_A09G02721.gene	-0.9408	0.817655		Ghi_A07G03761.gene	-1.81772	0.651222
Ghi_A11G01501.gene	0	1		Ghi_A11G01501.gene	0	1		Ghi_A05G06096.gene	-1.81772	0.651222
Ghi_A11G01506.gene	-0.837343	0.000642996092524		Ghi_A11G01506.gene	0.186724	0.363253		Ghi_A03G02501.gene	-1.81772	0.651222
Ghi_A09G02726.gene	0	1		Ghi_A09G02726.gene	0	1		Ghi_D05G03631.gene	-1.81772	0.651222
Ghi_A04G04016.gene	-0.90093	0.825256		Ghi_A04G04016.gene	-0.9408	0.817655		Ghi_D02G10316.gene	-1.81772	0.651222
Ghi_D04G10706.gene	0.0722814188211	0.849862		Ghi_D04G10706.gene	1.22948	9.35338520771e-05		Ghi_D02G01776.gene	-1.81772	0.651222
Ghi_D11G10206.gene	0	1		Ghi_D11G10206.gene	0	1		Ghi_A04G08166.gene	-1.81772	0.651222
Ghi_A10G04841.gene	-0.242749	0.0308123420829		Ghi_A10G04841.gene	-0.202223	0.0610668000002		Ghi_D05G10301.gene	-1.81772	0.651222
Ghi_A05G04551.gene	-0.391152	0.00243788474924		Ghi_A05G04551.gene	0.224318	0.0749756640554		Ghi_A01G10386.gene	-1.81772	0.651222
Ghi_A05G01706.gene	-0.740317	0.000748337616208		Ghi_A05G01706.gene	-0.150325	0.422405		Ghi_D11G09531.gene	-1.81772	0.651222
Ghi_D11G01181.gene	0.305381	0.0857936		Ghi_D11G01181.gene	0.945178	7.47719785684e-09		Ghi_A05G14151.gene	-1.81772	0.651222
Ghi_D11G01186.gene	-0.992147	0.00576305298553		Ghi_D11G01186.gene	-0.0338091	0.906531		Ghi_D02G12756.gene	-1.81772	0.651222
Ghi_A05G01701.gene	3.23356	0.00200876009124		Ghi_A05G01701.gene	0.0342326305241	0.985075		Ghi_A10G03361.gene	-1.81772	0.651222
Ghi_A05G04556.gene	4.94304	2.20019045592e-26		Ghi_A05G04556.gene	1.0357	0.224371		Ghi_A03G03431.gene	-1.81772	0.651222
Ghi_A10G11876.gene	0	1		Ghi_A10G11876.gene	0	1		Ghi_A01G10956.gene	-1.81772	0.651222
Ghi_A03G03941.gene	0.843309	0.0982280338135		Ghi_A03G03941.gene	0.746205	0.000308791324622		Ghi_A01G10596.gene	-1.81772	0.651222
Ghi_D08G03946.gene	0.998876	0.00499449613107		Ghi_D08G03946.gene	0.729191	0.0531716513764		Ghi_D10G07271.gene	-1.81772	0.651222
Ghi_D08G13596.gene	-0.0566817	0.747434		Ghi_D08G13596.gene	-0.0912941	0.614037		Ghi_D01G08596.gene	-1.81772	0.651222
Ghi_D08G13591.gene	1.02262	0.802113		Ghi_D08G13591.gene	0	1		Ghi_D02G04776.gene	-1.81772	0.651222
Ghi_D07G11971.gene	0	1		Ghi_D07G11971.gene	0	1		Ghi_D05G02611.gene	-1.81772	0.651222
Ghi_A10G11871.gene	0	1		Ghi_A10G11871.gene	0	1		Ghi_D04G10556.gene	-1.81772	0.651222
Ghi_A05G00076.gene	-0.17214	0.620159		Ghi_A05G00076.gene	-0.255613	0.491289		Ghi_A09G04671.gene	-1.81772	0.651222
Ghi_D09G10771.gene	1.10258	0.493408		Ghi_D09G10771.gene	0.532717	0.747562		Ghi_A04G07371.gene	-1.81772	0.651222
Ghi_A05G12796.gene	-0.0106088	0.9665		Ghi_A05G12796.gene	0.129318	0.612408		Ghi_A08G03896.gene	-1.81772	0.651222
Ghi_A05G12791.gene	-0.359351	0.421672		Ghi_A05G12791.gene	-0.425201	0.306328		Ghi_D07G03646.gene	-1.81772	0.651222
Ghi_A05G00071.gene	-0.239642	0.352732		Ghi_A05G00071.gene	-0.942792	0.000282696776715		Ghi_A05G22721.gene	-1.81772	0.651222
Ghi_A11G09086.gene	-0.00873839	0.974956		Ghi_A11G09086.gene	-0.0561466	0.839114		Ghi_D13G11886.gene	-1.81772	0.651222
Ghi_A08G08376.gene	1.62774	0.00432056482277		Ghi_A08G08376.gene	0.352933	0.600648		Ghi_D10G12231.gene	-1.81772	0.651222
Ghi_A07G07061.gene	-0.937716	0.163717		Ghi_A07G07061.gene	-0.726619	0.286159		Ghi_A13G04216.gene	-1.81772	0.651222
Ghi_A07G07066.gene	-0.318098	0.496977		Ghi_A07G07066.gene	-0.135339	0.769106		Ghi_A08G11506.gene	-1.81772	0.651222
Ghi_A08G08371.gene	0	1		Ghi_A08G08371.gene	0	1		Ghi_D04G04006.gene	-1.81772	0.651222
Ghi_A11G09081.gene	0	1		Ghi_A11G09081.gene	0	1		Ghi_D07G08646.gene	-1.81772	0.651222
Ghi_A11G17496.gene	-0.328401	0.0725742907505		Ghi_A11G17496.gene	-0.0476841	0.784374		Ghi_D06G10426.gene	-1.81772	0.651222
Ghi_A05G14301.gene	2.45498	0.526397		Ghi_A05G14301.gene	3.67746	0.119126		GhiUnG00116.gene	-1.81772	0.651222
Ghi_A05G08661.gene	-0.0161593	0.949573		Ghi_A05G08661.gene	0.213805	0.383501		Ghi_A09G03021.gene	-1.81772	0.651222
Ghi_A05G08666.gene	-0.519459	6.63339467232e-07		Ghi_A05G08666.gene	-0.114038	0.293014		Ghi_A07G02526.gene	-1.81772	0.651222
Ghi_A05G14306.gene	-0.843832	1.79968865638e-16		Ghi_A05G14306.gene	-0.0403343	0.660357		Ghi_A02G00171.gene	-1.81772	0.651222
Ghi_A05G06956.gene	0.990594	0.000519577191921		Ghi_A05G06956.gene	1.04326	8.47238249922e-06		Ghi_A03G05971.gene	-1.81772	0.651222
Ghi_A02G07061.gene	0	1		Ghi_A02G07061.gene	0.982753	0.809677		Ghi_D02G01331.gene	-1.81772	0.651222
Ghi_A02G07066.gene	0	1		Ghi_A02G07066.gene	0	1		Ghi_A06G10361.gene	-1.81772	0.651222
Ghi_A05G06951.gene	0.66109	2.33374045662e-09		Ghi_A05G06951.gene	0.0510617878137	0.673423		Ghi_D03G08871.gene	-1.81772	0.651222
Ghi_D12G07306.gene	0.528036	0.423158		Ghi_D12G07306.gene	0.0767180243609	0.912783		Ghi_D07G03791.gene	-1.81772	0.651222
Ghi_A05G15781.gene	-0.229762	0.122184		Ghi_A05G15781.gene	0.264952	0.0626318219795		Ghi_D11G02551.gene	-1.81772	0.651222
Ghi_D12G07301.gene	1.59096	1.00438994696e-20		Ghi_D12G07301.gene	0.402356	0.0249787768549		Ghi_D09G11241.gene	-1.81772	0.651222
Ghi_D11G01451.gene	-0.90093	0.825256		Ghi_D11G01451.gene	2.72479	0.172554		Ghi_D09G02391.gene	-1.81772	0.651222
Ghi_A11G17491.gene	0	1		Ghi_A11G17491.gene	0	1		Ghi_D06G04701.gene	-1.81772	0.651222
Ghi_D11G01456.gene	0.104707	0.321383		Ghi_D11G01456.gene	0.139678	0.203771		Ghi_A01G06256.gene	-1.81772	0.651222
Ghi_D08G02286.gene	0.0240019267445	0.85083		Ghi_D08G02286.gene	0.0018342686931	0.988344		Ghi_A05G07261.gene	-1.81772	0.651222
Ghi_A10G01171.gene	-0.346369	0.0583929202218		Ghi_A10G01171.gene	0.0965890651218	0.560577		Ghi_D08G14346.gene	-1.81772	0.651222
Ghi_A10G01176.gene	-0.0822919	0.706616		Ghi_A10G01176.gene	-0.0674782	0.742998		Ghi_A05G22956.gene	-1.81772	0.651222
Ghi_A01G12441.gene	0	1		Ghi_A01G12441.gene	0	1		Ghi_D05G11931.gene	-1.81772	0.651222
Ghi_A08G12321.gene	-4.48186	0.0319626475465		Ghi_A08G12321.gene	-0.499654	0.683894		Ghi_A05G14191.gene	-1.81772	0.651222
Ghi_A01G00661.gene	0.888444	1.07381572628e-07		Ghi_A01G00661.gene	0.332053	0.0345559508028		Ghi_A10G13061.gene	-1.81772	0.651222
Ghi_A05G07396.gene	0	1		Ghi_A05G07396.gene	0	1		Ghi_D11G06946.gene	-1.81772	0.651222
Ghi_D11G01486.gene	0.133456	0.199		Ghi_D11G01486.gene	0.0169832	0.879197		Ghi_A10G13251.gene	-1.81772	0.651222
Ghi_A12G09486.gene	0.0724461208906	0.724082		Ghi_A12G09486.gene	0.397134	0.0471766364134		Ghi_D11G15931.gene	-1.81772	0.651222
Ghi_A10G00226.gene	-0.169027	0.461678		Ghi_A10G00226.gene	0.140902	0.466541		Ghi_A05G23591.gene	-1.81772	0.651222
Ghi_A10G00221.gene	-0.0943239	0.602326		Ghi_A10G00221.gene	0.1058	0.544245		Ghi_A07G07476.gene	-1.81772	0.651222
Ghi_A05G07391.gene	-0.506001	0.724713		Ghi_A05G07391.gene	-1.57113	0.354479		Ghi_D10G01141.gene	-1.81772	0.651222
Ghi_D12G10906.gene	1.9626	2.01903088091e-10		Ghi_D12G10906.gene	0.58731	0.159537		Ghi_A07G00341.gene	-1.81772	0.651222
GhiUnG02136.gene	-0.174873	0.258207		GhiUnG02136.gene	0.216671	0.108732		Ghi_A12G02261.gene	-1.81772	0.651222
Ghi_A08G04706.gene	0.609105	0.00256300744453		Ghi_A08G04706.gene	0.708156	0.000154779256664		Ghi_D04G03661.gene	-1.81772	0.651222
GhiUnG02131.gene	0.845058	5.32641774679e-14		GhiUnG02131.gene	0.678338	1.95408148538e-10		Ghi_D09G05836.gene	-1.81772	0.651222
Ghi_D12G10901.gene	1.84737	2.25489569477e-30		Ghi_D12G10901.gene	0.127582	0.553652		Ghi_D11G08296.gene	-1.81772	0.651222
Ghi_D05G08671.gene	-0.110062	0.201304		Ghi_D05G08671.gene	0.0836383735778	0.329658		Ghi_D07G06421.gene	-1.81772	0.651222
Ghi_A11G01976.gene	-0.469312	0.10692		Ghi_A11G01976.gene	-0.109029	0.70328		Ghi_D09G06971.gene	-1.81772	0.651222
Ghi_A01G11336.gene	0	1		Ghi_A01G11336.gene	0	1		Ghi_D01G10326.gene	-1.81772	0.651222
Ghi_A11G06191.gene	-9.38755	8.43887559713e-11		Ghi_A11G06191.gene	-0.633305	0.0699626838981		Ghi_A02G03696.gene	-1.81772	0.651222
Ghi_A11G06196.gene	-1.5982	8.92257442707e-14		Ghi_A11G06196.gene	-1.697	6.25233501573e-07		Ghi_A02G00266.gene	-1.81772	0.651222
Ghi_A10G06686.gene	0	1		Ghi_A10G06686.gene	0	1		Ghi_D06G12386.gene	-1.81772	0.651222
Ghi_A10G06681.gene	0.438148	0.0268072712287		Ghi_A10G06681.gene	0.321115	0.130227		Ghi_D06G12521.gene	-1.81772	0.651222
Ghi_A06G00796.gene	0	1		Ghi_A06G00796.gene	0	1		Ghi_D10G08976.gene	-1.81772	0.651222
Ghi_D09G08851.gene	-0.091681	0.872198		Ghi_D09G08851.gene	-0.217048	0.694116		Ghi_A06G12731.gene	-1.81772	0.651222
Ghi_A09G01561.gene	-1.90034	0.114376		Ghi_A09G01561.gene	-0.193839	0.819335		Ghi_A05G05306.gene	-1.81772	0.651222
Ghi_D11G01481.gene	-0.566334	0.197017		Ghi_D11G01481.gene	-0.279032	0.472778		Ghi_D11G06716.gene	-1.81715	1.32996036686e-07
Ghi_A09G01566.gene	-0.506595	0.554875		Ghi_A09G01566.gene	0.190205	0.787832		Ghi_A11G11796.gene	-1.81533	0.312689
Ghi_D09G08856.gene	0.185553	0.447135		Ghi_D09G08856.gene	-0.0294662	0.904316		Ghi_D13G10416.gene	-1.8152	5.85393965598e-33
Ghi_A01G11931.gene	-1.37016	2.18660670325e-44		Ghi_A01G11931.gene	-0.411753	6.93805759202e-06		Ghi_D07G12956.gene	-1.8147	0.329612
Ghi_A06G11671.gene	1.82511	8.24925567824e-10		Ghi_A06G11671.gene	1.15307	0.000639715588521		Ghi_A01G01831.gene	-1.8146	0.30615
Ghi_D05G08071.gene	1.83773	6.54021171435e-21		Ghi_D05G08071.gene	0.640812	0.00103455944031		Ghi_A13G00511.gene	-1.81405	0.336281
Ghi_A11G02856.gene	0	1		Ghi_A11G02856.gene	0.982753	0.809677		Ghi_A12G06326.gene	-1.81405	0.336281
Ghi_A11G02851.gene	-0.408721	0.58203		Ghi_A11G02851.gene	-0.936024	0.262731		Ghi_D13G02376.gene	-1.81339	0.326936
Ghi_D05G08076.gene	0.0608421	0.987654		Ghi_D05G08076.gene	-0.9408	0.817655		Ghi_A05G04871.gene	-1.81255	0.174043
Ghi_A01G11936.gene	-0.138472	0.187136		Ghi_A01G11936.gene	-0.114672	0.235723		Ghi_A05G09256.gene	-1.81232	0.311973
Ghi_D13G12761.gene	0	1		Ghi_D13G12761.gene	0	1		Ghi_A11G01186.gene	-1.81232	0.311973
Ghi_D06G08496.gene	0	1		Ghi_D06G08496.gene	0	1		Ghi_A11G05371.gene	-1.8112	0.305303
Ghi_A13G06371.gene	0	1		Ghi_A13G06371.gene	0	1		Ghi_A08G04956.gene	-1.8108	0.0245710577998
Ghi_A13G06376.gene	0.842635	1.72732139923e-05		Ghi_A13G06376.gene	0.276179	0.175111		Ghi_A13G05811.gene	-1.80956	2.28224218296e-05
Ghi_D13G12766.gene	1.57285	0.152894		Ghi_D13G12766.gene	1.34964	0.237311		Ghi_D10G09711.gene	-1.80897	0.312646
GhiUnG02681.gene	0	1		GhiUnG02681.gene	0	1		Ghi_A01G09781.gene	-1.80758	2.44684023458e-11
Ghi_A03G00431.gene	-0.00483686	0.969064		Ghi_A03G00431.gene	0.0470222057882	0.715604		Ghi_A05G00761.gene	-1.80754	0.329798
Ghi_A13G07426.gene	0	1		Ghi_A13G07426.gene	0	1		Ghi_D10G00411.gene	-1.80664	0.369331
Ghi_A13G07421.gene	0.0134120976074	0.939874		Ghi_A13G07421.gene	-0.255223	0.164448		Ghi_A10G12736.gene	-1.8057	0.321686
Ghi_A03G00436.gene	0	1		Ghi_A03G00436.gene	0	1		Ghi_D02G10071.gene	-1.80472	0.312047
GhiUnG02686.gene	0	1		GhiUnG02686.gene	0	1		Ghi_A02G04031.gene	-1.80423	0.15965
Ghi_D08G09831.gene	-3.80848	0.0748281927639		Ghi_D08G09831.gene	-0.17719	0.900405		Ghi_A01G03661.gene	-1.80284	1.66318984547e-23
Ghi_D13G02661.gene	0	1		Ghi_D13G02661.gene	0	1		Ghi_A05G17136.gene	-1.80175	0.0232469525022
Ghi_A12G00471.gene	0.81181	0.00715045820893		Ghi_A12G00471.gene	-0.0874261	0.789411		Ghi_D12G00446.gene	-1.80148	0.343793
Ghi_D05G07951.gene	-0.134693	0.577073		Ghi_D05G07951.gene	0.353732	0.113507		Ghi_A08G15151.gene	-1.79965	0.315871
Ghi_D08G09836.gene	0.349749	0.0677276549274		Ghi_D08G09836.gene	-0.238897	0.255977		Ghi_D01G11051.gene	-1.79793	1.25391824878e-10
Ghi_D01G03946.gene	-1.35097	4.22630227089e-06		Ghi_D01G03946.gene	-0.669459	0.0104383329032		Ghi_D06G08311.gene	-1.79708	0.339804
Ghi_D08G10026.gene	1.28721	0.00193719336706		Ghi_D08G10026.gene	0.756693	0.0880702870736		Ghi_A02G01356.gene	-1.79664	0.166158
Ghi_D01G08841.gene	0	1		Ghi_D01G08841.gene	0	1		Ghi_A04G04056.gene	-1.7965	0.125204
Ghi_D01G08846.gene	0	1		Ghi_D01G08846.gene	0	1		Ghi_A10G03166.gene	-1.79512	0.335237
Ghi_D08G10021.gene	0	1		Ghi_D08G10021.gene	0	1		Ghi_A13G13626.gene	-1.79269	1.6223648907e-10
Ghi_A04G04901.gene	0.0763710108154	0.560392		Ghi_A04G04901.gene	0.290597	0.0156830411159		Ghi_D03G02841.gene	-1.79255	4.45783126417e-35
Ghi_A06G11676.gene	-0.589543	0.0740473494161		Ghi_A06G11676.gene	-0.586712	0.0795169592685		Ghi_A08G12211.gene	-1.78897	0.117341
Ghi_D03G07191.gene	-4.26228	0.000708759439672		Ghi_D03G07191.gene	-0.389587	0.532822		Ghi_D07G12291.gene	-1.78828	0.127525
Ghi_A04G04906.gene	-0.642632	0.0936053		Ghi_A04G04906.gene	-0.187646	0.584234		Ghi_A07G04626.gene	-1.78821	1.43094609229e-44
Ghi_A09G12666.gene	-0.710864	0.0124747561246		Ghi_A09G12666.gene	0.208836	0.408101		Ghi_A13G09281.gene	-1.7857	6.82383363026e-06
Ghi_A10G10471.gene	0	1		Ghi_A10G10471.gene	0	1		Ghi_D02G10546.gene	-1.78458	0.27758
Ghi_A09G12586.gene	0	1		Ghi_A09G12586.gene	0	1		Ghi_A07G01576.gene	-1.78319	2.40406960161e-06
Ghi_A09G12581.gene	-0.583305	0.315205		Ghi_A09G12581.gene	-0.570938	0.2819		Ghi_A09G08521.gene	-1.78248	0.358699
Ghi_A10G10476.gene	0	1		Ghi_A10G10476.gene	0	1		Ghi_A12G08161.gene	-1.78115	0.245205
Ghi_A10G01796.gene	-0.202438	0.798382		Ghi_A10G01796.gene	-0.101375	0.894277		Ghi_A02G07231.gene	-1.7808	0.260344
Ghi_D05G04601.gene	0	1		Ghi_D05G04601.gene	0	1		Ghi_D11G16246.gene	-1.77861	0.0281534565538
Ghi_A13G13736.gene	0.0654842571266	0.525348		Ghi_A13G13736.gene	-0.0574021	0.552394		Ghi_A11G00496.gene	-1.77633	0.200936
Ghi_D12G14026.gene	-2.4341	1.14704500441e-09		Ghi_D12G14026.gene	-1.62112	2.11801473072e-06		Ghi_D11G05351.gene	-1.77607	2.69365422099e-15
Ghi_D12G14021.gene	0	1		Ghi_D12G14021.gene	0	1		Ghi_D13G12631.gene	-1.77473	2.57538081815e-21
Ghi_A13G13731.gene	4.23525	1.57286443648e-44		Ghi_A13G13731.gene	-0.345068	0.581192		Ghi_D09G03946.gene	-1.77462	0.0711956465106
Ghi_D05G04606.gene	0.205139	0.104931		Ghi_D05G04606.gene	-0.0263707	0.827919		Ghi_A10G05366.gene	-1.77458	0.372583
Ghi_A10G01791.gene	0.839055	1.13419994712e-10		Ghi_A10G01791.gene	0.309877	0.0275426729189		Ghi_A12G02421.gene	-1.77457	0.244545
Ghi_A05G16236.gene	-0.608913	1.91539958833e-05		Ghi_A05G16236.gene	-0.30547	0.0178734		Ghi_D07G10791.gene	-1.77346	1.17562696535e-36
Ghi_A02G00591.gene	0.126892	0.412776		Ghi_A02G00591.gene	-0.116539	0.469349		Ghi_A09G10491.gene	-1.77281	2.32657130729e-16
Ghi_A02G00596.gene	1.19442	2.49678669349e-22		Ghi_A02G00596.gene	0.35201	0.0118285120533		Ghi_A09G05606.gene	-1.76999	1.24640609759e-81
Ghi_A05G16231.gene	-0.124406	0.427211		Ghi_A05G16231.gene	-0.273916	0.0716111955655		Ghi_D10G06801.gene	-1.76996	0.247626
Ghi_A13G14456.gene	-3.98244	0.00530633758983		Ghi_A13G14456.gene	-1.16619	0.293905		Ghi_D12G09671.gene	-1.76942	3.95939463752e-26
Ghi_A02G05511.gene	-0.0408648	0.718227		Ghi_A02G05511.gene	-0.0593724	0.624629		Ghi_A13G00941.gene	-1.76717	3.41171389969e-15
Ghi_D12G00336.gene	-0.90093	0.825256		Ghi_D12G00336.gene	0.0209820752121	0.995585		Ghi_A09G09171.gene	-1.76677	0.122806
Ghi_D13G04101.gene	0	1		Ghi_D13G04101.gene	0.982753	0.809677		Ghi_D04G05761.gene	-1.76613	0.271984
Ghi_D13G04106.gene	-2.78485	0.361722		Ghi_D13G04106.gene	-2.82369	0.332565		Ghi_D11G12861.gene	-1.7659	0.00238618583472
Ghi_D12G00331.gene	1.0782	7.4726888176e-15		Ghi_D12G00331.gene	0.628093	1.04080164434e-05		Ghi_A10G13106.gene	-1.7656	0.238218
Ghi_A02G05516.gene	0	1		Ghi_A02G05516.gene	0	1		Ghi_D11G03651.gene	-1.7642	0.0106567383724
Ghi_A04G02501.gene	0.567504	0.00238424437296		Ghi_A04G02501.gene	0.219273	0.208203		Ghi_D05G04101.gene	-1.76369	1.27999826213e-16
Ghi_A07G09506.gene	0	1		Ghi_A07G09506.gene	0	1		Ghi_A08G05151.gene	-1.76352	1.19388914358e-42
Ghi_D13G07456.gene	-1.88099	0.0312929022314		Ghi_D13G07456.gene	-0.198639	0.745423		Ghi_D09G11321.gene	-1.76142	0.123899
Ghi_A07G06731.gene	-0.62557	5.4052142488e-08		Ghi_A07G06731.gene	0.22596	0.0321654353917		Ghi_D12G10276.gene	-1.75893	0.102178
Ghi_A07G09501.gene	0	1		Ghi_A07G09501.gene	0	1		Ghi_D03G01996.gene	-1.75854	0.000329054506492
Ghi_A04G02506.gene	0	1		Ghi_A04G02506.gene	0	1		Ghi_A03G11041.gene	-1.75775	1.57767434488e-09
Ghi_D13G00481.gene	-1.77939	0.652976		Ghi_D13G00481.gene	-0.857944	0.77802		Ghi_D09G05631.gene	-1.75676	0.000415891129228
Ghi_D13G00486.gene	0	1		Ghi_D13G00486.gene	0	1		Ghi_D12G02171.gene	-1.7532	9.21029243049e-16
Ghi_A05G06041.gene	-1.11337	0.462697		Ghi_A05G06041.gene	-3.04052	0.123043		Ghi_D12G03306.gene	-1.7532	9.21029243049e-16
Ghi_D09G10011.gene	0.0567371180247	0.57679		Ghi_D09G10011.gene	-0.234015	0.0261579303019		Ghi_D05G07426.gene	-1.75312	2.9354539924e-05
Ghi_A10G07796.gene	-0.137683	0.298759		Ghi_A10G07796.gene	-0.222391	0.115327		Ghi_D11G18301.gene	-1.75268	0.238865
Ghi_A01G12446.gene	0	1		Ghi_A01G12446.gene	0	1		Ghi_A05G00206.gene	-1.75251	0.241033
Ghi_A10G07791.gene	0	1		Ghi_A10G07791.gene	0	1		Ghi_D09G09041.gene	-1.75179	0.00724738375879
Ghi_D09G10016.gene	0.600941	0.000412136935555		Ghi_D09G10016.gene	0.0858284516744	0.619043		Ghi_A03G11036.gene	-1.75142	0.0943885315348
Ghi_A05G06046.gene	0.211044	0.863741		Ghi_A05G06046.gene	-0.809816	0.583413		Ghi_D13G09741.gene	-1.74927	1.65844947488e-26
Ghi_D11G12116.gene	-0.702092	0.000101381159365		Ghi_D11G12116.gene	-0.570893	0.00153046271209		Ghi_D13G04991.gene	-1.74902	0.259406
Ghi_D08G02166.gene	0	1		Ghi_D08G02166.gene	0	1		Ghi_D04G09981.gene	-1.74876	0.0910247719819
Ghi_D04G04496.gene	0	1		Ghi_D04G04496.gene	0	1		Ghi_A03G03491.gene	-1.74656	0.269976
Ghi_A04G02931.gene	0	1		Ghi_A04G02931.gene	0	1		Ghi_D12G11636.gene	-1.74412	0.241109
Ghi_A07G05421.gene	3.51577	4.09042249136e-27		Ghi_A07G05421.gene	1.83707	9.90833595571e-06		Ghi_D08G13746.gene	-1.74358	7.14378017863e-06
Ghi_A07G05426.gene	1.57135	0.566097		Ghi_A07G05426.gene	0.910684	0.764182		Ghi_A07G14016.gene	-1.74261	1.11168623817e-05
GhiUnG02266.gene	0.64683	0.676732		GhiUnG02266.gene	0.589524	0.725047		Ghi_D07G00461.gene	-1.74238	0.117572
Ghi_A05G03671.gene	-0.723122	1.51749560946e-05		Ghi_A05G03671.gene	0.0320118539531	0.829543		Ghi_D13G12911.gene	-1.7422	1.86508963901e-05
Ghi_A02G00041.gene	0.764326	7.44597605519e-11		Ghi_A02G00041.gene	0.193599	0.110423		Ghi_D12G14706.gene	-1.74208	0.22829
Ghi_A07G09236.gene	0	1		Ghi_A07G09236.gene	0	1		Ghi_A07G06506.gene	-1.74193	0.267041
Ghi_D13G12186.gene	0	1		Ghi_D13G12186.gene	0	1		Ghi_D04G01066.gene	-1.74092	2.54311285112e-05
Ghi_D13G12181.gene	-4.0867	5.8017472414e-05		Ghi_D13G12181.gene	-0.505817	0.376275		Ghi_D07G03471.gene	-1.7391	6.32789769101e-23
Ghi_A13G07221.gene	0	1		Ghi_A13G07221.gene	0	1		Ghi_D11G02806.gene	-1.73862	0.00167350758687
Ghi_A02G00046.gene	0.0551829134191	0.979822		Ghi_A02G00046.gene	-0.571054	0.820369		Ghi_A08G10791.gene	-1.73851	0.242826
Ghi_A05G03676.gene	0.0739726339217	0.715914		Ghi_A05G03676.gene	-0.275905	0.168384		Ghi_A11G13416.gene	-1.73802	0.0330822424689
Ghi_D13G01686.gene	-0.873943	0.00149570625055		Ghi_D13G01686.gene	0.253241	0.214925		Ghi_A11G03136.gene	-1.73749	0.000123268368631
Ghi_A11G16946.gene	0.873597	0.000245589259705		Ghi_A11G16946.gene	-0.3596	0.198373		Ghi_A11G08866.gene	-1.73585	0.259397
Ghi_A10G05336.gene	0.513633	4.58324489976e-06		Ghi_A10G05336.gene	0.205733	0.0656452267563		Ghi_D09G01736.gene	-1.73516	0.245702
Ghi_A10G05331.gene	0	1		Ghi_A10G05331.gene	0.982753	0.809677		Ghi_D04G05016.gene	-1.73161	0.0290046346483
Ghi_D13G01681.gene	-0.0628467	0.585197		Ghi_D13G01681.gene	-0.148913	0.195922		Ghi_A06G09431.gene	-1.7313	0.244357
Ghi_A09G13186.gene	0.282026	0.00585614838796		Ghi_A09G13186.gene	-0.0923245	0.382513		Ghi_A13G14711.gene	-1.73072	3.80722508781e-08
Ghi_A13G08621.gene	1.02262	0.802113		Ghi_A13G08621.gene	0	1		Ghi_A04G08161.gene	-1.73036	0.192509
Ghi_A13G08626.gene	-2.07644	6.6936288933e-08		Ghi_A13G08626.gene	-0.00394909	0.988371		Ghi_D02G02146.gene	-1.72999	8.92659006813e-08
Ghi_A09G13181.gene	0.145934	0.78171		Ghi_A09G13181.gene	-0.0808789	0.882751		Ghi_D13G10846.gene	-1.72932	2.94427623115e-17
Ghi_D13G00151.gene	-0.545164	0.0145319		Ghi_D13G00151.gene	-0.179807	0.361107		Ghi_D09G01671.gene	-1.72929	0.00524239054866
Ghi_A02G03581.gene	0	1		Ghi_A02G03581.gene	0	1		Ghi_D06G09886.gene	-1.72924	0.241067
Ghi_A07G06881.gene	0	1		Ghi_A07G06881.gene	0	1		Ghi_A02G07586.gene	-1.72924	0.101451
Ghi_A06G12691.gene	0	1		Ghi_A06G12691.gene	0	1		Ghi_D09G10776.gene	-1.72793	0.0307570298363
Ghi_A06G12696.gene	0	1		Ghi_A06G12696.gene	0	1		Ghi_A05G10791.gene	-1.72769	0.0143182142275
Ghi_A07G06886.gene	0	1		Ghi_A07G06886.gene	0	1		Ghi_A10G01966.gene	-1.72726	3.05610670832e-07
Ghi_A02G03586.gene	0	1		Ghi_A02G03586.gene	0	1		Ghi_D07G00421.gene	-1.72543	0.191406
Ghi_D13G00156.gene	0	1		Ghi_D13G00156.gene	0	1		Ghi_D12G00386.gene	-1.72511	0.247077
Ghi_A05G15661.gene	-0.588557	0.0510384		Ghi_A05G15661.gene	-0.191389	0.463734		Ghi_A02G03106.gene	-1.72511	0.247077
Ghi_A13G01746.gene	0.0467859275336	0.65744		Ghi_A13G01746.gene	0.221186	0.0217256061751		Ghi_D11G04981.gene	-1.72481	2.5865339788e-10
Ghi_A05G05636.gene	-0.183783	0.195889		Ghi_A05G05636.gene	-0.195949	0.156338		Ghi_A10G05681.gene	-1.7232	1.21077799781e-09
Ghi_A13G04996.gene	0	1		Ghi_A13G04996.gene	0	1		Ghi_A12G14946.gene	-1.72318	0.0886634910822
Ghi_A10G07241.gene	0	1		Ghi_A10G07241.gene	0	1		Ghi_A01G01676.gene	-1.72236	0.191518
Ghi_A10G07246.gene	-0.90093	0.825256		Ghi_A10G07246.gene	1.50536	0.610898		Ghi_D09G09456.gene	-1.72002	0.0822791756275
Ghi_A13G04991.gene	0.761664	2.34371623785e-05		Ghi_A13G04991.gene	-0.0789572	0.701854		GhiUnG01061.gene	-1.71196	0.197983
Ghi_A05G05631.gene	0.0858603563342	0.661804		Ghi_A05G05631.gene	-0.00782002	0.968177		Ghi_D12G15401.gene	-1.71095	6.60299493391e-90
Ghi_A13G01741.gene	-0.102981	0.926172		Ghi_A13G01741.gene	-0.58716	0.643025		Ghi_A12G07761.gene	-1.70966	1.4221065739e-06
Ghi_D05G08926.gene	0.774878	3.25998452377e-08		Ghi_D05G08926.gene	0.324417	0.0278066436974		Ghi_A05G01556.gene	-1.70955	2.6387067397e-12
Ghi_D05G08921.gene	-1.10344	0.00772485095772		Ghi_D05G08921.gene	-0.415854	0.260397		Ghi_D08G09631.gene	-1.70946	0.181303
Ghi_A01G12111.gene	0.199785	0.250174		Ghi_A01G12111.gene	0.0477483405481	0.789497		Ghi_D01G00921.gene	-1.70911	0.178698
Ghi_D09G00911.gene	0	1		Ghi_D09G00911.gene	0	1		Ghi_A11G14386.gene	-1.70858	0.162681
Ghi_A03G06206.gene	1.46243	7.78333946465e-14		Ghi_A03G06206.gene	-0.191086	0.456188		Ghi_A11G16736.gene	-1.70706	0.313497
Ghi_D04G07806.gene	-0.738787	0.00119675094906		Ghi_D04G07806.gene	-0.0178265	0.928344		Ghi_D08G10501.gene	-1.70686	1.34060001978e-19
Ghi_D09G00916.gene	0	1		Ghi_D09G00916.gene	0	1		Ghi_A08G03051.gene	-1.7063	5.67831932013e-14
Ghi_D02G06731.gene	0.0902033131053	0.60692		Ghi_D02G06731.gene	-0.201272	0.220083		Ghi_A08G02301.gene	-1.70588	1.26010742403e-35
Ghi_A05G16491.gene	0.73111	1.93467672606e-06		Ghi_A05G16491.gene	0.330125	0.0337841984829		Ghi_A03G03156.gene	-1.70446	1.43613332385e-11
Ghi_A05G16496.gene	0	1		Ghi_A05G16496.gene	0	1		Ghi_D01G00946.gene	-1.70419	5.02374222474e-07
Ghi_D09G09896.gene	-2.30442	0.0026430466607		Ghi_D09G09896.gene	-0.752308	0.217763		Ghi_D10G07586.gene	-1.70395	0.00068208977699
Ghi_A13G08191.gene	0.0739087335808	0.931172		Ghi_A13G08191.gene	-0.376068	0.663494		Ghi_A12G09606.gene	-1.7038	3.27504613586e-13
Ghi_A13G02136.gene	-2.24044	3.871957113e-10		Ghi_A13G02136.gene	0.296488	0.258172		Ghi_A12G09601.gene	-1.7038	3.27504613586e-13
Ghi_A12G05186.gene	-2.64659	3.07406668168e-45		Ghi_A12G05186.gene	-0.576532	4.28417793533e-05		Ghi_D12G13641.gene	-1.70375	3.74106979317e-26
Ghi_A12G05181.gene	0	1		Ghi_A12G05181.gene	0	1		Ghi_D09G03601.gene	-1.70365	2.02712350786e-16
Ghi_A09G13231.gene	0.742004	1.33855817524e-11		Ghi_A09G13231.gene	0.108774	0.336483		Ghi_A11G04621.gene	-1.70255	2.60021070655e-12
Ghi_A13G08196.gene	0	1		Ghi_A13G08196.gene	0	1		Ghi_A13G09491.gene	-1.7022	0.142554
Ghi_D09G09891.gene	-0.929403	1.50428490692e-13		Ghi_D09G09891.gene	-0.261664	0.00854898738527		Ghi_D04G05356.gene	-1.70118	0.254039
Ghi_D02G04351.gene	0.189098	0.50993		Ghi_D02G04351.gene	0.269546	0.354183		Ghi_A13G11471.gene	-1.69964	1.12394071041e-25
Ghi_D05G09031.gene	0.133907	0.421558		Ghi_D05G09031.gene	0.138051	0.372158		Ghi_D03G06351.gene	-1.69782	0.000809783184218
Ghi_D05G05551.gene	-0.617692	0.257554		Ghi_D05G05551.gene	-0.146642	0.753439		Ghi_A09G15451.gene	-1.6965	4.10547119332e-18
Ghi_D07G11621.gene	0	1		Ghi_D07G11621.gene	1.88234	0.641056		Ghi_A04G04651.gene	-1.69007	1.51295743209e-14
Ghi_D07G11626.gene	-1.79132	1.63859367499e-17		Ghi_D07G11626.gene	-0.411624	0.0475226529497		Ghi_D05G04161.gene	-1.68793	0.000436791058645
Ghi_D05G05556.gene	0.607952	0.00285903776854		Ghi_D05G05556.gene	0.212802	0.324136		Ghi_D07G03091.gene	-1.68727	1.19046620399e-33
Ghi_D05G09036.gene	-0.90093	0.825256		Ghi_D05G09036.gene	2.24021	0.34097		Ghi_A13G05976.gene	-1.68712	6.4457400906e-43
Ghi_D02G04356.gene	0.690353	8.47792829482e-06		Ghi_D02G04356.gene	-0.266639	0.0722721389749		Ghi_A09G10811.gene	-1.68523	3.7694940206e-13
Ghi_A09G15171.gene	-0.369577	0.124677		Ghi_A09G15171.gene	-0.0774811	0.720012		Ghi_D10G11511.gene	-1.68363	9.6510691104e-11
Ghi_D09G03791.gene	0	1		Ghi_D09G03791.gene	1.88234	0.641056		Ghi_D05G04426.gene	-1.68297	4.54046710784e-07
Ghi_D07G10576.gene	-2.28897	0.000738251366505		Ghi_D07G10576.gene	0.763111	0.0536163735045		Ghi_A03G01021.gene	-1.68116	5.34669562037e-18
Ghi_D07G10571.gene	0.259326	0.645082		Ghi_D07G10571.gene	-0.0433963	0.938123		Ghi_A06G02626.gene	-1.68088	0.126251
Ghi_D09G03796.gene	0.165258	0.791382		Ghi_D09G03796.gene	-0.68978	0.353589		Ghi_D13G11456.gene	-1.68053	1.59254078489e-33
Ghi_A08G04021.gene	0.856207	1.11422281895e-14		Ghi_A08G04021.gene	0.295203	0.0113418551421		Ghi_D10G04171.gene	-1.67697	3.36464431228e-09
Ghi_A09G15176.gene	0.0431244432454	0.716973		Ghi_A09G15176.gene	-0.10254	0.394611		Ghi_D05G02881.gene	-1.67635	0.0731528272688
Ghi_D06G09446.gene	-0.297981	0.556786		Ghi_D06G09446.gene	0.336492	0.434096		Ghi_D06G02916.gene	-1.67504	0.148105
Ghi_D04G01401.gene	-0.930654	0.59256		Ghi_D04G01401.gene	-0.977803	0.575372		Ghi_A03G07106.gene	-1.67461	0.00042096142916
Ghi_D10G13201.gene	0	1		Ghi_D10G13201.gene	0	1		Ghi_A05G12826.gene	-1.67457	0.0407525741766
Ghi_D10G13206.gene	0.0317502507372	0.827453		Ghi_D10G13206.gene	-0.165673	0.291098		Ghi_D05G13166.gene	-1.67377	0.193007
Ghi_D04G01406.gene	-0.675496	0.00566573556453		Ghi_D04G01406.gene	-0.420743	0.0621475080813		Ghi_D08G12436.gene	-1.67264	0.0420833167463
Ghi_D06G09441.gene	-0.558949	0.846753		Ghi_D06G09441.gene	-0.55068	0.827743		Ghi_D11G11966.gene	-1.67263	0.00236058179422
Ghi_A05G14891.gene	2.45498	0.526397		Ghi_A05G14891.gene	3.19574	0.227411		Ghi_A07G13171.gene	-1.67262	0.161945
Ghi_D11G04401.gene	-0.432757	0.238346		Ghi_D11G04401.gene	-0.698231	0.0694515645743		Ghi_A06G03466.gene	-1.6699	0.45355
Ghi_A07G05286.gene	-1.54964	0.246858		Ghi_A07G05286.gene	-1.03407	0.311373		Ghi_D12G15171.gene	-1.66909	0.000805962465766
Ghi_A08G14196.gene	0.704712	0.0117783465678		Ghi_A08G14196.gene	0.34314	0.248		Ghi_D06G02491.gene	-1.66779	1.20417144559e-16
Ghi_A07G05281.gene	0	1		Ghi_A07G05281.gene	0	1		Ghi_A06G00681.gene	-1.66755	0.000785734238084
Ghi_A01G09121.gene	-1.253	2.69847808456e-10		Ghi_A01G09121.gene	-0.283697	0.140312		Ghi_D02G11001.gene	-1.66559	0.0263268671244
Ghi_A07G08671.gene	0	1		Ghi_A07G08671.gene	0	1		Ghi_A01G00141.gene	-1.66505	0.104297
Ghi_A13G03421.gene	-0.651783	7.84348730055e-05		Ghi_A13G03421.gene	0.584258	4.49008121788e-05		Ghi_A11G15936.gene	-1.66356	2.48684118643e-10
Ghi_A08G14191.gene	0.36421	0.0271119507039		Ghi_A08G14191.gene	0.228558	0.167175		Ghi_D13G07251.gene	-1.66109	0.117383
Ghi_A12G01406.gene	-0.228115	0.627861		Ghi_A12G01406.gene	-0.419866	0.380318		Ghi_A08G10621.gene	-1.66072	5.57224149206e-07
Ghi_D04G02796.gene	-0.65261	8.87006691997e-08		Ghi_D04G02796.gene	0.00664569135493	0.951924		Ghi_A09G08626.gene	-1.65994	0.123272
Ghi_A12G01401.gene	0.00658954110898	0.95343		Ghi_A12G01401.gene	0.205309	0.0593293472067		GhiUnG03316.gene	-1.65923	0.347563
Ghi_A09G10526.gene	-0.703121	8.24665073812e-06		Ghi_A09G10526.gene	-0.197158	0.191886		Ghi_A04G05601.gene	-1.65868	0.139167
Ghi_D13G04816.gene	0	1		Ghi_D13G04816.gene	0	1		Ghi_D01G01801.gene	-1.6573	1.3172843367e-51
Ghi_A13G14826.gene	2.08916	3.2791964576e-47		Ghi_A13G14826.gene	0.581341	0.000651144738488		Ghi_D11G18191.gene	-1.65719	2.77543390946e-30
Ghi_A13G14821.gene	0	1		Ghi_A13G14821.gene	0	1		Ghi_A09G07976.gene	-1.65683	0.0749421709019
Ghi_D13G04811.gene	-0.633847	1.46343371064e-05		Ghi_D13G04811.gene	-0.106918	0.431067		Ghi_D11G15191.gene	-1.6565	3.72068029862e-06
Ghi_A11G04791.gene	-0.872928	1.52105536297e-17		Ghi_A11G04791.gene	0.06289	0.484309		Ghi_D09G01661.gene	-1.65589	0.0763266174688
Ghi_A05G12071.gene	-2.83409	0.205468		Ghi_A05G12071.gene	-0.647764	0.696452		Ghi_A12G15346.gene	-1.65183	2.95177712816e-24
Ghi_D07G11191.gene	0.578223	0.0105363239497		Ghi_D07G11191.gene	0.288689	0.201932		Ghi_D08G04241.gene	-1.65097	0.0571957293389
Ghi_A07G04771.gene	0.711627	0.00193839465693		Ghi_A07G04771.gene	0.196729	0.498359		Ghi_A05G11561.gene	-1.6462	0.0016658183894
Ghi_A07G04776.gene	-0.883965	0.00169019940714		Ghi_A07G04776.gene	-0.216321	0.389606		Ghi_D13G13581.gene	-1.64553	0.000810716602902
Ghi_D07G11196.gene	-1.64351	3.48619603393e-05		Ghi_D07G11196.gene	1.16095	1.17813915853e-05		Ghi_A05G06561.gene	-1.64427	0.0593469742155
Ghi_D03G02401.gene	-0.584705	3.53092823977e-06		Ghi_D03G02401.gene	-0.14665	0.226693		Ghi_D12G10046.gene	-1.64307	0.158578
Ghi_A08G12106.gene	-1.31283	0.197545		Ghi_A08G12106.gene	-0.970499	0.29366		Ghi_D05G02876.gene	-1.64253	0.0541451230478
Ghi_D11G04406.gene	0	1		Ghi_D11G04406.gene	0	1		Ghi_D06G12196.gene	-1.64228	0.0315832809827
Ghi_A08G12101.gene	0	1		Ghi_A08G12101.gene	0	1		Ghi_A05G09361.gene	-1.64204	5.37483335476e-05
Ghi_D03G08161.gene	-0.99556	9.23540662913e-07		Ghi_D03G08161.gene	-0.456569	0.0140865896839		Ghi_A03G12141.gene	-1.64147	0.40196
Ghi_D03G08166.gene	-1.25305	4.03858298639e-06		Ghi_D03G08166.gene	-0.148072	0.526708		Ghi_D10G00946.gene	-1.63832	2.93715902885e-11
Ghi_A05G05091.gene	-1.18324	1.61512726887e-05		Ghi_A05G05091.gene	-0.940321	0.000799985490293		Ghi_D12G04416.gene	-1.63776	0.425214
Ghi_A07G01056.gene	-5.17888	7.6960799254e-36		Ghi_A07G01056.gene	1.16577	2.26255803222e-10		Ghi_D08G11991.gene	-1.63774	0.0012017260216
Ghi_A07G01051.gene	-2.61042	0.000128578776547		Ghi_A07G01051.gene	-1.79176	0.00244468076391		Ghi_D07G11706.gene	-1.63649	0.000163478292825
Ghi_A05G05096.gene	-0.404725	0.203204		Ghi_A05G05096.gene	0.256741	0.36146		Ghi_A02G10156.gene	-1.63647	0.000208362235325
Ghi_A04G03961.gene	0	1		Ghi_A04G03961.gene	0	1		Ghi_A05G03136.gene	-1.63411	0.397926
Ghi_A02G07801.gene	0	1		Ghi_A02G07801.gene	0	1		Ghi_A12G05886.gene	-1.63411	0.397926
Ghi_A03G08816.gene	0	1		Ghi_A03G08816.gene	0	1		Ghi_D03G01126.gene	-1.63411	0.397926
Ghi_A10G12721.gene	1.02262	0.802113		Ghi_A10G12721.gene	0	1		Ghi_D05G04076.gene	-1.63183	0.300766
Ghi_D13G06411.gene	0	1		Ghi_D13G06411.gene	0	1		Ghi_D03G00041.gene	-1.6318	3.60502652016e-08
Ghi_D13G06416.gene	0.587535	4.40537032966e-05		Ghi_D13G06416.gene	0.0165420809538	0.901881		Ghi_A06G03751.gene	-1.63083	4.09597161953e-05
Ghi_A10G12726.gene	0.277271	0.391682		Ghi_A10G12726.gene	-0.5848	0.0937145042255		Ghi_A12G09201.gene	-1.62961	0.000129589992066
Ghi_A02G07806.gene	0	1		Ghi_A02G07806.gene	0	1		Ghi_D13G04726.gene	-1.62921	0.302315
Ghi_D03G04806.gene	0	1		Ghi_D03G04806.gene	0	1		Ghi_A13G11971.gene	-1.62872	0.00150599228179
Ghi_D12G13346.gene	1.8916	0.00110926268635		Ghi_D12G13346.gene	1.28096	0.0592656131094		Ghi_A09G14756.gene	-1.62802	0.000189798437229
Ghi_D12G13341.gene	-1.02081	0.0369369025044		Ghi_D12G13341.gene	0.0893957337589	0.82441		Ghi_D13G04191.gene	-1.62694	0.411868
Ghi_D03G04801.gene	0	1		Ghi_D03G04801.gene	0	1		Ghi_A08G10591.gene	-1.62677	0.303427
Ghi_A05G04946.gene	0.135984	0.427836		Ghi_A05G04946.gene	-0.114674	0.513363		Ghi_A05G03961.gene	-1.62667	0.400589
Ghi_D11G13796.gene	0	1		Ghi_D11G13796.gene	0	1		Ghi_D05G07086.gene	-1.62667	0.400589
Ghi_D11G13791.gene	0	1		Ghi_D11G13791.gene	0	1		Ghi_A10G02481.gene	-1.62611	5.34265795857e-12
Ghi_A05G04941.gene	-0.634383	0.0440904481478		Ghi_A05G04941.gene	-1.1334	0.000100198004356		Ghi_A12G07676.gene	-1.6256	0.0178560531112
Ghi_A07G04481.gene	1.54811	5.1636827983e-25		Ghi_A07G04481.gene	0.315902	0.0345723047123		Ghi_A05G23111.gene	-1.62439	0.403772
Ghi_A07G00901.gene	1.02262	0.802113		Ghi_A07G00901.gene	0	1		Ghi_D09G04406.gene	-1.62346	0.00795709623091
Ghi_A11G15391.gene	-0.722249	2.3617894615e-07		Ghi_A11G15391.gene	-0.324871	0.0123132870354		Ghi_A05G22636.gene	-1.62262	0.00171798897239
Ghi_A07G00906.gene	-0.468644	0.0646359298724		Ghi_A07G00906.gene	1.12023	3.51381498774e-08		Ghi_D04G07736.gene	-1.62256	0.387273
Ghi_A07G04486.gene	0.548662	0.234516		Ghi_A07G04486.gene	0.131814	0.793164		Ghi_A01G06786.gene	-1.62206	1.55120900899e-09
Ghi_A05G22226.gene	-0.35538	0.00314297750771		Ghi_A05G22226.gene	-0.0787954	0.434553		Ghi_A06G04586.gene	-1.62154	8.47067449021e-11
Ghi_A05G22221.gene	0.952174	0.159522		Ghi_A05G22221.gene	0.026731	0.97157		Ghi_A10G03021.gene	-1.62077	4.85291329055e-08
Ghi_D06G08141.gene	0	1		Ghi_D06G08141.gene	0	1		Ghi_D08G08871.gene	-1.62073	0.433915
Ghi_A06G12341.gene	0.0542613012569	0.96364		Ghi_A06G12341.gene	1.70296	0.0502208663339		Ghi_A09G12346.gene	-1.62071	0.189996
Ghi_A01G01446.gene	-0.541607	0.000106777909194		Ghi_A01G01446.gene	-0.14004	0.290016		Ghi_A02G05051.gene	-1.62041	0.191517
Ghi_D04G02266.gene	0.0438792750086	0.782892		Ghi_D04G02266.gene	0.450155	0.00369469944437		Ghi_D11G13486.gene	-1.62002	0.234836
Ghi_D04G02261.gene	-0.773882	0.272235		Ghi_D04G02261.gene	-1.35846	0.0872683129821		Ghi_A12G00371.gene	-1.61816	5.7943359328e-26
Ghi_A01G01441.gene	-0.327319	0.182288		Ghi_A01G01441.gene	0.101061	0.621178		Ghi_D02G04441.gene	-1.61779	0.355281
Ghi_A06G12346.gene	-0.538885	4.53456916619e-08		Ghi_A06G12346.gene	0.0837155367971	0.376572		Ghi_A10G05036.gene	-1.61628	0.00929129597938
Ghi_A05G21756.gene	-0.609488	0.124999		Ghi_A05G21756.gene	0.969227	0.00462324062027		Ghi_A05G07391.gene	-1.6162	0.408693
Ghi_A08G11666.gene	-3.64423	6.53794928864e-06		Ghi_A08G11666.gene	-1.57659	0.00459107565108		Ghi_D02G11991.gene	-1.6162	0.408693
Ghi_A08G11661.gene	6.45321	6.11149187368e-07		Ghi_A08G11661.gene	4.00061	0.0150403215036		Ghi_D13G02116.gene	-1.61454	1.16621549964e-22
Ghi_A05G21751.gene	0.811854	0.0287397878018		Ghi_A05G21751.gene	0.27747	0.494709		Ghi_D01G00136.gene	-1.61425	0.264402
Ghi_D04G10521.gene	-0.765295	2.12954127532e-10		Ghi_D04G10521.gene	-0.0343742	0.722064		Ghi_D11G02556.gene	-1.61333	0.405406
Ghi_A12G12966.gene	-0.531618	0.0194821234374		Ghi_A12G12966.gene	-0.669704	0.00296075530019		Ghi_D11G05666.gene	-1.6128	3.22375022936e-25
Ghi_A12G12961.gene	5.72598	0.000125809647855		Ghi_A12G12961.gene	0	1		Ghi_D06G09281.gene	-1.61221	0.384062
Ghi_D04G10526.gene	1.02262	0.802113		Ghi_D04G10526.gene	0	1		Ghi_D09G11741.gene	-1.61127	2.13864511546e-18
Ghi_A05G13671.gene	-2.35744	5.08764740168e-08		Ghi_A05G13671.gene	-0.149096	0.622655		Ghi_D03G06566.gene	-1.61109	0.277899
Ghi_A03G04846.gene	-0.90093	0.825256		Ghi_A03G04846.gene	-0.9408	0.817655		Ghi_A05G04296.gene	-1.61038	0.297839
Ghi_A03G04841.gene	0	1		Ghi_A03G04841.gene	0	1		Ghi_D02G01666.gene	-1.60996	5.06566367654e-06
Ghi_D06G08146.gene	-0.917615	0.00382431803887		Ghi_D06G08146.gene	0.0521616177998	0.848474		Ghi_A12G00801.gene	-1.60989	1.78470199961e-31
Ghi_A05G13676.gene	0.558849	1.96454269956e-07		Ghi_A05G13676.gene	-0.142979	0.230764		Ghi_A02G09491.gene	-1.60975	0.294873
Ghi_D06G00871.gene	-4.88472	7.85988072165e-295		Ghi_D06G00871.gene	0.135463	0.147202		Ghi_A03G10656.gene	-1.60965	0.408332
Ghi_D06G00131.gene	-0.965882	0.661998		Ghi_D06G00131.gene	-1.86804	0.428182		Ghi_A11G11111.gene	-1.60936	0.0902981399272
Ghi_A02G02351.gene	0	1		Ghi_A02G02351.gene	0.982753	0.809677		Ghi_D10G09901.gene	-1.6093	0.385579
Ghi_A02G02356.gene	-1.00887	0.0094597909694		Ghi_A02G02356.gene	-0.438132	0.213713		Ghi_D08G06906.gene	-1.60918	0.00382956178313
Ghi_D09G08071.gene	-0.369042	0.0350591220565		Ghi_D09G08071.gene	-0.0657399	0.693564		Ghi_D11G11401.gene	-1.6085	0.385855
Ghi_D11G06211.gene	0.892862	0.55073		Ghi_D11G06211.gene	0.499873	0.749855		Ghi_D10G04656.gene	-1.60838	3.10986878441e-22
Ghi_D04G08131.gene	0	1		Ghi_D04G08131.gene	0	1		Ghi_D13G03286.gene	-1.60826	0.163438
Ghi_D09G01791.gene	-0.841283	0.000867093747896		Ghi_D09G01791.gene	-0.403916	0.0576018679989		Ghi_A07G02536.gene	-1.6081	0.137387
Ghi_A09G11691.gene	-2.29696	0.0252611934239		Ghi_A09G11691.gene	-0.233283	0.748037		Ghi_D12G10621.gene	-1.608	1.54794295521e-23
Ghi_D04G09081.gene	-1.74996	0.00443027911928		Ghi_D04G09081.gene	0.877475	0.0261791782872		Ghi_A08G01021.gene	-1.6076	0.221911
Ghi_A09G11696.gene	-0.585555	2.30485267241e-10		Ghi_A09G11696.gene	0.0112273382757	0.893092		Ghi_D02G04051.gene	-1.60748	0.256678
Ghi_A12G07126.gene	0.297878	0.514747		Ghi_A12G07126.gene	0.777525	0.0736075770162		Ghi_D01G00791.gene	-1.60632	0.178993
GhiUnG01561.gene	-1.02539	2.42037413203e-13		GhiUnG01561.gene	-0.115544	0.353651		Ghi_D09G02931.gene	-1.60608	0.00015826200482
Ghi_A03G03311.gene	0.494565	2.58170556659e-07		Ghi_A03G03311.gene	0.270645	0.0104043860682		Ghi_A11G09476.gene	-1.60577	0.386389
Ghi_A02G00836.gene	0.412455	0.00667521563665		Ghi_A02G00836.gene	0.181998	0.239695		Ghi_D12G14191.gene	-1.60484	0.00397602713788
Ghi_A03G03316.gene	0.501627	0.0643442877638		Ghi_A03G03316.gene	0.135599	0.63504		Ghi_A07G03521.gene	-1.60451	0.311287
GhiUnG01566.gene	0	1		GhiUnG01566.gene	0	1		Ghi_A07G00596.gene	-1.60424	0.184382
Ghi_A04G00576.gene	0	1		Ghi_A04G00576.gene	0	1		Ghi_D11G15956.gene	-1.60422	0.0576714284139
Ghi_A05G19326.gene	0.394108	0.0355112776649		Ghi_A05G19326.gene	0.238187	0.213496		Ghi_A08G07146.gene	-1.60274	0.2427
Ghi_A13G13351.gene	0	1		Ghi_A13G13351.gene	0	1		Ghi_D11G10661.gene	-1.60212	0.237117
Ghi_A05G19321.gene	-0.068071	0.767755		Ghi_A05G19321.gene	0.143341	0.493804		Ghi_D12G05501.gene	-1.60206	0.00041822497556
Ghi_A09G11921.gene	0.778855	1.31658399202e-05		Ghi_A09G11921.gene	-0.00864672	0.96475		Ghi_D10G05741.gene	-1.60172	0.255109
[truncated: 72,352 more rows]

## Sheet: Figure 3
CK vs DS					CK vs CK_MT					DS vs DS_MT
Term	p_value	Count	Category		Term	p_value	Count	Category		Term	p_value	Count	Category
cellular anatomical entity	4.74523E-08	7604	CC		membrane	0.000327256	811	CC		membrane	0.0366047	947	CC
membrane	0.000655374	4500	CC		plasma membrane	7.42869E-09	128	CC		plasma membrane	0.0465204	123	CC
plasma membrane	2.14581E-20	626	CC		extracellular region	3.69928E-11	88	CC		organelle membrane	0.0408163	122	CC
extracellular region	9.43434E-14	352	CC		apoplast	0.00337475	22	CC		bounding membrane of organelle	0.0544584	91	CC
plastid	0.0233986	286	CC		side of membrane	9.75606E-07	18	CC		cytosol	0.0458772	74	CC
chloroplast	0.022398	250	CC		extracellular space	0.01057	14	CC		extracellular region	0.0492372	71	CC
supramolecular complex	0.000188276	166	CC		peroxisome	0.0318086	11	CC		plastid membrane	0.0881543	64	CC
plastid membrane	0.000315372	159	CC		external encapsulating structure	0.0406313	9	CC		outer membrane	0.0925926	60	CC
supramolecular fiber	1.79889E-10	158	CC		plant-type cell wall	0.0114887	8	CC		organelle outer membrane	0.0925926	60	CC
supramolecular polymer	1.79889E-10	158	CC		cyclin-dependent protein kinase holoenzyme complex	0.0206178	8	CC		chloroplast thylakoid membrane	0.125301	52	CC
polymeric cytoskeletal fiber	1.79889E-10	158	CC		cell wall	0.0215591	8	CC		plastid thylakoid membrane	0.1247	52	CC
microtubule	8.86065E-10	154	CC		mitochondrial tricarboxylic acid cycle enzyme complex	0.0201769	2	CC		thylakoid membrane	0.115044	52	CC
outer membrane	0.00256771	138	CC		mitochondrial alpha-ketoglutarate dehydrogenase complex	0.0201769	2	CC		photosynthetic membrane	0.115044	52	CC
organelle outer membrane	0.00256771	138	CC							photosystem	0.147541	36	CC
apoplast	3.57542E-05	99	CC							photosystem II	0.217391	35	CC
photosynthetic membrane	0.013589	96	CC							photosystem I	0.219512	27	CC
thylakoid membrane	0.013589	96	CC							microbody	0.0905797	25	CC
chloroplast thylakoid membrane	0.00294841	93	CC							peroxisome	0.11	22	CC
plastid thylakoid membrane	0.00371706	93	CC							apoplast	0.0528967	21	CC
protein-DNA complex	0.00605285	78	CC							side of membrane	0.0925926	15	CC

## Sheet: Figure 4
CK vs DS					CK vs CK_MT					DS vs DS_MT
Term	p_value	Count	Category		Term	p_value	Count	Category		Term	p_value	Count	Category
molecular_function	1.81127E-22	9009	MF		molecular_function	2.24E-13	1588	MF		molecular_function	3.99618E-13	1848	MF
catalytic activity	4.1761E-26	5644	MF		catalytic activity	1.17E-34	1133	MF		catalytic activity	3.33215E-18	1221	MF
ion binding	0.036411	3394	MF		ion binding	0.00106425	624	MF		oxidoreductase activity	7.5601E-39	335	MF
small molecule binding	6.96706E-07	1905	MF		transferase activity	0.0222234	440	MF		transporter activity	3.91003E-08	188	MF
anion binding	4.96293E-07	1850	MF		hydrolase activity	0.0271118	356	MF		transmembrane transporter activity	2.77854E-08	185	MF
nucleoside phosphate binding	1.27332E-06	1777	MF		small molecule binding	0.00817405	335	MF		DNA-binding transcription factor activity	0.0116055	138	MF
nucleotide binding	1.27332E-06	1777	MF		anion binding	0.00548379	327	MF		tetrapyrrole binding	2.40119E-21	119	MF
purine nucleotide binding	0.00132358	1623	MF		nucleoside phosphate binding	0.00428196	317	MF		glycosyltransferase activity	6.16349E-11	113	MF
carbohydrate derivative binding	0.0007116	1588	MF		nucleotide binding	0.00428196	317	MF		oxidoreductase activity, acting on paired donors, with incorporation or reduction of molecular oxygen	1.11666E-18	107	MF
ribonucleotide binding	0.000987304	1567	MF		carbohydrate derivative binding	0.00883263	289	MF		hydrolase activity, acting on glycosyl bonds	1.15971E-14	99	MF
purine ribonucleotide binding	0.00129841	1548	MF		ribonucleotide binding	0.0185512	282	MF		iron ion binding	1.76303E-16	95	MF
purine ribonucleoside triphosphate binding	3.45293E-05	1517	MF		purine ribonucleotide binding	0.0369288	275	MF		monooxygenase activity	1.70191E-17	94	MF
adenyl nucleotide binding	2.01123E-05	1499	MF		adenyl nucleotide binding	0.00274332	274	MF		heme binding	9.41016E-14	93	MF
adenyl ribonucleotide binding	1.69146E-05	1424	MF		catalytic activity, acting on a protein	0.00116136	271	MF		sequence-specific DNA binding	0.00264373	90	MF
ATP binding	1.13327E-07	1393	MF		purine ribonucleoside triphosphate binding	0.0160619	269	MF		hydrolase activity, hydrolyzing O-glycosyl compounds	9.83119E-14	89	MF
DNA binding	1.52839E-05	1171	MF		oxidoreductase activity	4.85E-26	266	MF		protein serine/threonine kinase activity	0.0168968	87	MF
oxidoreductase activity	8.47957E-36	1126	MF		adenyl ribonucleotide binding	0.00149108	263	MF		hexosyltransferase activity	1.01914E-09	71	MF
kinase activity	9.14793E-09	1044	MF		ATP binding	0.0004555	257	MF		UDP-glycosyltransferase activity	2.79438E-11	67	MF
phosphotransferase activity, alcohol group as acceptor	1.42932E-12	863	MF		kinase activity	1.10E-07	216	MF		lyase activity	1.22192E-05	67	MF
protein kinase activity	1.66757E-14	799	MF		phosphotransferase activity, alcohol group as acceptor	1.39E-10	189	MF		glucosyltransferase activity	2.72673E-12	52	MF

## Sheet: FIgure 5
CK vs DS					CK vs CK_MT					DS vs DS_MT
Term	p_value	Count	Category		Term	p_value	Count	Category		Term	p_value	Count	Category
biological_process	8.70599E-07	7026	BP		phosphorus metabolic process	2.56108E-06	230	BP		metabolic process	0.0445011	877	BP
metabolic process	1.10389E-05	4394	BP		phosphate-containing compound metabolic process	3.69855E-06	225	BP		response to stimulus	1.53108E-05	232	BP
biological regulation	0.0440142	1529	BP		phosphorylation	1.50027E-07	192	BP		small molecule metabolic process	7.15385E-11	192	BP
regulation of cellular process	0.00980732	1368	BP		lipid metabolic process	2.93882E-14	131	BP		carbohydrate metabolic process	5.50987E-19	181	BP
biosynthetic process	0.000152627	1365	BP		carbohydrate metabolic process	7.19763E-09	130	BP		catabolic process	0.000260853	151	BP
organic substance biosynthetic process	0.00131171	1285	BP		catabolic process	0.00285645	125	BP		organic substance catabolic process	0.000159413	144	BP
phosphorus metabolic process	1.466E-08	1161	BP		organic substance catabolic process	0.00247986	118	BP		lipid metabolic process	1.20768E-09	131	BP
phosphate-containing compound metabolic process	6.08762E-09	1142	BP		cellular lipid metabolic process	3.33785E-12	98	BP		oxoacid metabolic process	8.39392E-10	128	BP
response to stimulus	0.0458853	938	BP		lipid biosynthetic process	8.58486E-11	79	BP		organic acid metabolic process	8.74987E-10	128	BP
phosphorylation	4.03119E-09	922	BP		oxoacid metabolic process	0.0489206	77	BP		carboxylic acid metabolic process	2.57809E-09	124	BP
small molecule metabolic process	1.18395E-12	757	BP		developmental process	0.0144984	73	BP		cellular lipid metabolic process	7.49437E-05	84	BP
carbohydrate metabolic process	2.6157E-28	673	BP		cellular catabolic process	0.00473351	59	BP		small molecule biosynthetic process	6.79062E-08	81	BP
regulation of nucleobase-containing compound metabolic process	0.00230208	662	BP		polysaccharide metabolic process	1.62044E-06	58	BP		developmental process	0.0329894	81	BP
catabolic process	9.46235E-05	650	BP		defense response	0.0175801	58	BP		response to abiotic stimulus	5.62249E-10	80	BP
regulation of RNA metabolic process	0.00262281	638	BP		transmembrane transport	0.0124333	57	BP		transmembrane transport	5.23419E-05	77	BP
regulation of RNA biosynthetic process	0.000433886	627	BP		response to external stimulus	0.00303231	53	BP		polysaccharide metabolic process	2.52941E-09	73	BP
regulation of DNA-templated transcription	0.000433886	627	BP		monocarboxylic acid metabolic process	8.91338E-05	46	BP		cellular catabolic process	0.000990327	71	BP
organic substance catabolic process	0.000472683	601	BP		polysaccharide catabolic process	8.35783E-10	41	BP		lipid biosynthetic process	6.29567E-05	69	BP
lipid metabolic process	2.80916E-19	543	BP		fatty acid metabolic process	1.08402E-08	41	BP		defense response	0.0281096	65	BP
signal transduction	0.000212679	512	BP		carbohydrate catabolic process	3.51927E-05	41	BP		amino acid metabolic process	3.08727E-05	62	BP

## Sheet: Figure 6
CK vs DS					CK vs CK_MT					DS vs DS_MT
Term	count	Rich_Factor	P_value		Term	count	Rich_Factor	P_value		Term	count	Rich_Factor	P_value
Plant hormone signal transduction	326	0.231206	4.92363407757e-08		Plant hormone signal transduction	64	0.0453901	7.4121820912e-05		MAPK signaling pathway - plant	56	0.0659599528857	2.70024602986e-06
MAPK signaling pathway - plant	201	0.236749	3.6107978142e-06		Cutin, suberine and wax biosynthesis	44	0.243094	6.81922054124e-29		Starch and sucrose metabolism	47	0.0814558058925	4.87333546589e-08
Biosynthesis of cofactors	171	0.202607	0.0239172590268		MAPK signaling pathway - plant	43	0.0506478209658	0.000113038444526		Glyoxylate and dicarboxylate metabolism	39	0.122257	7.22240333506e-12
Starch and sucrose metabolism	170	0.294627	1.3001899415e-12		Phenylpropanoid biosynthesis	41	0.0575035063114	9.60434028984e-06		Glycolysis / Gluconeogenesis	39	0.0835117773019	3.52506358333e-07
Motor proteins	133	0.268145	1.84715701723e-07		Plant-pathogen interaction	36	0.0361445783133	0.0608490860999		Amino sugar and nucleotide sugar metabolism	37	0.0750507099391	8.31902925166e-06
Amino sugar and nucleotide sugar metabolism	129	0.261663	1.15468777177e-06		Pentose and glucuronate interconversions	29	0.0526315789474	0.00077321402746		Pyruvate metabolism	34	0.0767494356659	1.19651279866e-05
Glycolysis / Gluconeogenesis	109	0.233405	0.000932177967845		Starch and sucrose metabolism	28	0.0485268630849	0.00304245081579		Phenylpropanoid biosynthesis	34	0.0476858345021	0.0335361
Pyruvate metabolism	101	0.227991	0.00302330342244		alpha-Linolenic acid metabolism	26	0.100386	1.7022613117e-08		Flavonoid biosynthesis	28	0.0701754385965	0.000302718418655
ABC transporters	90	0.289389	5.39494551414e-07		ABC transporters	26	0.0836012861736	6.39516253326e-07		Photosynthesis - antenna proteins	26	0.440678	7.91934783631e-23
Cysteine and methionine metabolism	89	0.234211	0.00231225220066		Biosynthesis of various plant secondary metabolites	23	0.0798611111111	5.96843189925e-06		Biosynthesis of various plant secondary metabolites	26	0.0902777777778	7.73122288263e-06
Flavonoid biosynthesis	88	0.220551	0.0128895506051		Fatty acid degradation	21	0.101449	3.31234844166e-07		Carbon fixation in photosynthetic organisms	24	0.0866426	3.32874015033e-05
Biosynthesis of various plant secondary metabolites	88	0.305556	5.09531924016e-08		Peroxisome	19	0.0562130177515	0.00287277232739		Peroxisome	21	0.0621301775148	0.00663950184127
Biosynthesis of nucleotide sugars	86	0.254438	0.000180084444403		Flavonoid biosynthesis	19	0.047619	0.0155948609211		Biosynthesis of nucleotide sugars	21	0.0621301775148	0.00663950184127
Glycerophospholipid metabolism	85	0.238764	0.00160133697452		Sesquiterpenoid and triterpenoid biosynthesis	19	0.162393	5.25244888471e-10		Cysteine and methionine metabolism	21	0.0552631578947	0.0221532359398
Glyoxylate and dicarboxylate metabolism	85	0.266458	3.50831920933e-05		Glycerophospholipid metabolism	16	0.0449438202247	0.0391895		Alanine, aspartate and glutamate metabolism	19	0.100529	2.88968151839e-05
Peroxisome	79	0.233728	0.00412421941872		Tryptophan metabolism	16	0.0599251	0.00321459384417		Galactose metabolism	19	0.0844444444444	0.000292673903438
alpha-Linolenic acid metabolism	77	0.297297	1.10591000705e-06		Glycerolipid metabolism	15	0.0530035335689	0.0124658526592		alpha-Linolenic acid metabolism	19	0.0733590733591	0.0015970431537
Cutin, suberine and wax biosynthesis	73	0.403315	5.32274806207e-13		Cyanoamino acid metabolism	13	0.0722222222222	0.00152590132645		Tryptophan metabolism	19	0.0711610486891	0.00225493031809
Tryptophan metabolism	72	0.269663	8.86229328161e-05		Glutathione metabolism	13	0.0415335463259	0.0943339858297		Glutathione metabolism	19	0.0607028753994	0.0119335909117
Glycerolipid metabolism	71	0.250883	0.000939974695884		Diterpenoid biosynthesis	11	0.102804	0.000182496408818		Brassinosteroid biosynthesis	18	0.181818	6.60727988564e-09
										Circadian rhythm - plant	16	0.0658436213992	0.00985210064276
										Thiamine metabolism	9	0.1125	0.00163076522888
										Taurine and hypotaurine metabolism	5	0.121951	0.0125163403903

## Sheet: Figure 7
Thiamine metabolism
Gene ID	Log2FC(DS vs CK)	Log2FC(CK_MT vs CK)	Log2FC(DS_MT vs DS)
Ghi_D03G07201.gene	-1.10578	-0.554617	1.07828
Ghi_A03G03086.gene	-0.278933	-0.270063	1.22216
Ghi_D06G09006.gene	-2.05684	-0.424431	1.38721
Ghi_D05G05851.gene	-1.86438	-0.505311	1.47093
Ghi_A01G03361.gene	-1.64909	-0.48346	1.25066
Ghi_A05G10696.gene	-1.28728	-0.252691	1.41235
Ghi_A06G09411.gene	-2.40079	-0.367078	1.77865
Ghi_A08G01351.gene	-2.22597	1.28953	1.88747
Ghi_D08G01366.gene	-0.458073	1.53	1.94017
Taurine and hypotaurine metabolism
Gene ID	Log2FC(DS vs CK)	Log2FC(CK_MT vs CK)	Log2FC(DS_MT vs DS)
Ghi_A01G09861.gene	4.34756	-0.9408	-4.29536
Ghi_A01G09866.gene	2.8097	-0.0242488	-3.7914
Ghi_D01G09256.gene	1.73379	-0.554468	-1.38081
Ghi_A06G03736.gene	-1.74078	0.0609367834026	1.05219
Ghi_D03G02356.gene	-3.19096	-0.159462	1.44018

## Sheet: Figure 8
A					C
CK vs DS	CK vs CK_MT	DS vs DS_MT			turquoise	black	blue	grey	MT_Drought_DEGs
Ghi_D09G09491.gene	Ghi_D09G09491.gene	Ghi_D09G09491.gene			Ghi_A10G06021.gene	Ghi_A05G18936.gene	Ghi_D09G09491.gene	Ghi_A10G02861.gene	Ghi_A11G03136.gene
Ghi_A11G18011.gene	Ghi_D11G09226.gene	Ghi_A11G18011.gene			Ghi_D13G02826.gene	Ghi_A03G12611.gene	Ghi_A11G18011.gene	Ghi_D12G15571.gene	Ghi_D08G12041.gene
Ghi_A10G06021.gene	Ghi_A11G05011.gene	Ghi_D12G15456.gene			Ghi_A10G14071.gene	Ghi_A05G10586.gene	Ghi_A06G03701.gene	Ghi_D05G09116.gene	Ghi_D11G08651.gene
Ghi_D13G02826.gene	Ghi_A11G05781.gene	Ghi_A13G04641.gene			Ghi_A05G05871.gene	Ghi_A01G00056.gene	Ghi_A08G00821.gene	Ghi_D09G07986.gene	Ghi_A10G01116.gene
Ghi_A10G14071.gene	Ghi_A02G04031.gene	Ghi_A09G11986.gene			Ghi_D11G09221.gene	Ghi_D13G01936.gene	Ghi_A03G02351.gene	Ghi_A11G02266.gene	Ghi_D12G04396.gene
Ghi_A05G05871.gene	Ghi_A02G01001.gene	Ghi_A03G02351.gene			Ghi_D11G09226.gene	Ghi_A06G07956.gene	Ghi_D05G02371.gene	Ghi_D12G02281.gene	Ghi_A11G05546.gene
Ghi_D11G09226.gene	Ghi_A10G01341.gene	Ghi_A11G05011.gene			Ghi_D12G15456.gene	Ghi_A03G09431.gene	Ghi_A07G12281.gene	Ghi_A09G06801.gene	Ghi_D03G09051.gene
Ghi_A02G02841.gene	Ghi_A13G06141.gene	Ghi_D11G15951.gene			Ghi_A02G02841.gene	Ghi_D11G10506.gene	Ghi_D11G15956.gene	Ghi_A06G01171.gene	Ghi_A02G05746.gene
Ghi_A05G01371.gene	Ghi_D08G12266.gene	Ghi_D10G01541.gene			Ghi_A05G01371.gene	Ghi_D12G07801.gene	Ghi_A11G05781.gene	Ghi_A07G04631.gene	Ghi_A10G10256.gene
Ghi_A13G04641.gene	Ghi_D11G02121.gene	Ghi_D07G07721.gene			Ghi_A13G04641.gene	Ghi_D06G00656.gene	Ghi_A05G10831.gene	Ghi_D02G09691.gene	Ghi_A11G07656.gene
Ghi_A06G03706.gene	Ghi_D12G09221.gene	Ghi_A07G03686.gene			Ghi_A06G03706.gene	Ghi_D10G10741.gene	Ghi_A05G00421.gene	Ghi_D07G04561.gene	Ghi_D11G13296.gene
Ghi_A09G11986.gene	Ghi_D12G09226.gene	Ghi_A12G14886.gene			Ghi_A09G11986.gene	Ghi_A12G11646.gene	Ghi_A05G07431.gene		Ghi_A05G22651.gene
Ghi_A06G03701.gene	Ghi_A05G13586.gene	Ghi_D08G12266.gene			Ghi_A06G09341.gene	Ghi_D05G11176.gene	Ghi_A08G10481.gene		Ghi_A13G03001.gene
Ghi_A08G00821.gene	Ghi_A09G11166.gene	Ghi_A13G12016.gene			GhiUnG00906.gene	Ghi_A08G15316.gene	Ghi_A02G04031.gene		Ghi_D10G06146.gene
Ghi_A03G02351.gene	Ghi_A03G00241.gene	Ghi_D09G06241.gene			Ghi_D09G08176.gene	Ghi_D07G10776.gene	Ghi_A10G01341.gene		Ghi_A10G04206.gene
GhiUnG00906.gene	Ghi_D12G05331.gene	Ghi_D07G11096.gene			Ghi_A05G15341.gene	Ghi_D03G05206.gene	Ghi_A04G05141.gene		Ghi_A05G23686.gene
Ghi_D09G08176.gene	Ghi_A03G12616.gene	Ghi_A05G10581.gene			Ghi_A11G05011.gene	Ghi_A04G06416.gene	Ghi_A13G06141.gene		Ghi_A06G10866.gene
Ghi_A05G15341.gene	Ghi_A13G05616.gene	Ghi_A12G07516.gene			Ghi_D11G15951.gene	Ghi_D05G01246.gene	Ghi_D13G13341.gene		Ghi_D11G01436.gene
Ghi_A11G05011.gene	Ghi_A01G05221.gene	Ghi_A08G07411.gene			Ghi_A02G01001.gene	Ghi_A04G01996.gene	Ghi_A01G07411.gene		Ghi_A05G04606.gene
Ghi_D05G02371.gene	Ghi_A09G09726.gene	Ghi_A13G05616.gene			Ghi_A02G01006.gene	Ghi_A11G16946.gene	Ghi_D08G12266.gene		Ghi_D09G07986.gene
Ghi_A07G12281.gene	Ghi_D10G01736.gene	Ghi_A03G13566.gene			Ghi_D10G01541.gene	Ghi_D02G04356.gene	Ghi_D11G02126.gene		Ghi_D13G04536.gene
Ghi_D11G15956.gene	Ghi_A08G11436.gene	Ghi_D10G13071.gene			Ghi_A12G14556.gene	Ghi_A07G01056.gene	Ghi_D11G02121.gene		Ghi_D11G02536.gene
Ghi_D11G15951.gene	Ghi_D07G01071.gene	Ghi_D07G04096.gene			Ghi_D07G07721.gene	Ghi_A06G09451.gene	Ghi_D12G09221.gene		Ghi_D07G10556.gene
Ghi_A11G05781.gene	Ghi_D13G03396.gene	Ghi_A01G11751.gene			Ghi_A12G09721.gene	Ghi_A01G04251.gene	Ghi_D12G09226.gene		Ghi_D11G15121.gene
Ghi_A05G10831.gene	Ghi_A04G07246.gene	Ghi_A09G04536.gene			Ghi_A12G09726.gene	Ghi_A10G03026.gene	Ghi_A02G09781.gene		Ghi_D05G06546.gene
Ghi_A05G00421.gene	Ghi_D08G06651.gene	Ghi_A09G14156.gene			Ghi_A07G03686.gene	Ghi_A03G07576.gene	Ghi_A05G13586.gene		Ghi_A11G01211.gene
Ghi_A05G07431.gene	Ghi_D08G06656.gene	Ghi_D12G12471.gene			Ghi_A07G03681.gene	Ghi_D01G12001.gene	Ghi_A03G00241.gene		Ghi_A11G06161.gene
Ghi_A08G10481.gene	Ghi_A05G09361.gene	Ghi_A12G05016.gene			Ghi_A12G14886.gene	Ghi_A11G14331.gene	Ghi_D12G05331.gene		GhiUnG03281.gene
Ghi_A02G01006.gene	Ghi_A05G09366.gene	Ghi_D11G13821.gene			Ghi_D06G11496.gene	Ghi_A03G01191.gene	Ghi_D09G06246.gene		Ghi_A07G02676.gene
Ghi_A10G01341.gene	Ghi_A05G08181.gene	Ghi_A01G02366.gene			Ghi_A03G00866.gene	Ghi_D05G08221.gene	Ghi_A10G04121.gene		Ghi_D04G09936.gene
Ghi_D10G01541.gene	Ghi_D08G03681.gene	Ghi_A05G09361.gene			Ghi_A12G05601.gene	Ghi_D05G08226.gene	Ghi_D09G06241.gene		Ghi_D01G01566.gene
Ghi_A04G05141.gene	Ghi_A11G01201.gene	Ghi_A05G09366.gene			Ghi_D05G05361.gene	Ghi_A08G13171.gene	Ghi_A03G12616.gene		Ghi_D09G02551.gene
Ghi_A12G14556.gene	Ghi_A01G05011.gene	Ghi_A13G02056.gene			Ghi_A07G13626.gene	Ghi_A05G03826.gene	Ghi_D07G11096.gene		Ghi_D04G02766.gene
Ghi_D07G07721.gene	Ghi_A13G12656.gene	Ghi_A05G07631.gene			Ghi_A13G12016.gene	Ghi_A06G08201.gene	Ghi_A10G12661.gene		Ghi_A03G07071.gene
Ghi_A12G09721.gene	Ghi_D02G03536.gene	Ghi_D11G14886.gene			Ghi_A05G11871.gene	Ghi_A06G00781.gene	Ghi_D01G05066.gene		Ghi_A06G05106.gene
Ghi_A13G06141.gene	Ghi_A05G02466.gene	Ghi_A09G03376.gene			Ghi_A11G12881.gene	Ghi_D11G07406.gene	Ghi_D05G14866.gene		Ghi_D01G09501.gene
Ghi_A07G03686.gene	Ghi_A12G13401.gene	Ghi_A02G00256.gene			Ghi_D05G14246.gene	Ghi_A11G01821.gene	Ghi_A01G06456.gene		Ghi_A08G12751.gene
Ghi_D13G13341.gene	Ghi_D05G00991.gene	Ghi_A06G11361.gene			Ghi_A09G11166.gene	Ghi_D04G01031.gene	Ghi_A02G03336.gene		Ghi_A11G03551.gene
Ghi_A12G14886.gene	Ghi_A13G01126.gene	Ghi_D10G10741.gene			Ghi_A07G12586.gene	Ghi_A02G00916.gene	Ghi_A08G07411.gene		Ghi_A03G03086.gene
Ghi_D06G11496.gene	Ghi_D05G14461.gene	Ghi_A06G08731.gene			Ghi_A11G14181.gene	Ghi_A05G13151.gene	Ghi_A13G05616.gene		Ghi_A11G05431.gene
Ghi_A03G00866.gene	Ghi_A05G11241.gene	Ghi_D03G00536.gene			Ghi_A05G10581.gene	Ghi_D01G01716.gene	Ghi_A03G13566.gene		Ghi_D11G11696.gene
Ghi_A12G05601.gene	Ghi_D03G00536.gene	Ghi_D06G12631.gene			Ghi_A01G01811.gene	Ghi_A12G00761.gene	Ghi_A03G13561.gene		Ghi_A07G12206.gene
Ghi_D05G05361.gene	Ghi_D09G10481.gene	Ghi_D06G08426.gene			Ghi_A02G07901.gene	Ghi_D01G02491.gene	Ghi_A07G11411.gene		Ghi_A04G04421.gene
Ghi_A01G07411.gene	Ghi_A13G06146.gene	Ghi_A01G00226.gene			Ghi_D06G09811.gene	Ghi_A10G14471.gene	Ghi_D10G13071.gene		Ghi_D06G10181.gene
Ghi_D08G12266.gene	Ghi_D05G11171.gene	Ghi_A05G13261.gene			Ghi_A12G07516.gene	Ghi_A10G13271.gene	Ghi_D07G04096.gene		Ghi_A06G12836.gene
Ghi_A07G13626.gene	Ghi_A05G23571.gene	Ghi_A01G00221.gene			Ghi_A09G12326.gene	Ghi_A12G09901.gene	Ghi_A06G11686.gene		Ghi_A01G08371.gene
Ghi_D11G02126.gene	Ghi_A02G01216.gene	Ghi_D06G10411.gene			Ghi_A01G05221.gene	Ghi_A09G13106.gene	Ghi_D02G11271.gene		Ghi_D07G03621.gene
Ghi_A05G18936.gene	Ghi_A09G00941.gene	Ghi_D05G07426.gene			Ghi_A02G01966.gene	Ghi_A09G13101.gene	Ghi_D02G11276.gene		Ghi_D06G00151.gene
Ghi_D11G02121.gene	Ghi_A11G10146.gene	Ghi_D03G08361.gene			Ghi_D01G02591.gene	Ghi_A04G06806.gene	Ghi_A01G05486.gene		Ghi_A12G00371.gene
Ghi_D12G09221.gene	Ghi_A01G00226.gene	Ghi_A08G07621.gene			Ghi_D01G02596.gene	Ghi_A12G13696.gene	Ghi_A01G05481.gene		Ghi_D02G02666.gene
Ghi_A13G12016.gene	Ghi_A05G13261.gene	Ghi_D03G08366.gene			Ghi_A01G01101.gene	Ghi_D13G12931.gene	Ghi_D05G12836.gene		Ghi_A11G16581.gene
Ghi_D12G09226.gene	Ghi_D06G10411.gene	Ghi_A12G07496.gene			Ghi_A06G01076.gene	Ghi_A11G05306.gene	Ghi_D13G01931.gene		Ghi_A11G06106.gene
Ghi_A05G11871.gene	Ghi_D03G08361.gene	Ghi_D07G04531.gene			Ghi_D01G03516.gene	Ghi_A01G11191.gene	Ghi_A10G09396.gene		Ghi_D02G07126.gene
Ghi_A02G09781.gene	Ghi_D07G04681.gene	Ghi_A11G17746.gene			Ghi_A10G09391.gene	Ghi_A09G03171.gene	Ghi_A12G15736.gene		Ghi_D12G05326.gene
Ghi_A11G12881.gene	Ghi_A08G00101.gene	Ghi_A01G08381.gene			Ghi_A01G11751.gene	Ghi_A10G01031.gene	Ghi_A06G06396.gene		Ghi_D03G06351.gene
Ghi_A05G13586.gene	Ghi_A06G06216.gene	Ghi_D11G09501.gene			Ghi_D11G09596.gene	Ghi_A11G05216.gene	Ghi_A09G09726.gene		Ghi_D11G10921.gene
Ghi_D05G14246.gene	Ghi_A03G00146.gene	Ghi_A10G09566.gene			Ghi_A03G12371.gene	Ghi_A06G08421.gene	Ghi_D05G04861.gene		Ghi_D13G03016.gene
Ghi_A03G00241.gene	Ghi_D09G08746.gene	Ghi_D12G13661.gene			Ghi_A09G04536.gene	Ghi_A12G03016.gene	Ghi_D05G04866.gene		Ghi_D10G00811.gene
Ghi_D12G05331.gene	Ghi_A05G09281.gene	Ghi_D10G08406.gene			Ghi_D09G05756.gene	Ghi_A02G08866.gene	Ghi_D07G03061.gene		Ghi_D09G00621.gene
Ghi_D09G06246.gene	Ghi_D08G02046.gene	Ghi_A08G09881.gene			Ghi_A03G01876.gene	Ghi_D10G10966.gene	Ghi_D05G10151.gene		Ghi_A01G09866.gene
Ghi_A10G04121.gene	Ghi_A09G03231.gene	Ghi_A05G09281.gene			Ghi_A11G16711.gene	Ghi_D05G01121.gene	Ghi_D07G06651.gene		Ghi_A12G04051.gene
Ghi_D09G06241.gene	Ghi_D04G10706.gene	Ghi_A05G04556.gene			Ghi_A01G05016.gene	Ghi_A01G02011.gene	Ghi_A09G12416.gene		Ghi_D11G12121.gene
Ghi_A03G12616.gene	Ghi_A05G06956.gene	Ghi_A10G01171.gene			Ghi_A09G14156.gene	Ghi_A03G04226.gene	Ghi_D10G01736.gene		Ghi_A05G22771.gene
Ghi_A03G12611.gene	Ghi_A11G06196.gene	Ghi_A13G13731.gene			Ghi_A10G08511.gene	Ghi_A11G02516.gene	Ghi_A08G11436.gene		Ghi_D07G09711.gene
Ghi_A07G12586.gene	Ghi_A06G11671.gene	Ghi_A07G05421.gene			Ghi_A11G04491.gene	Ghi_D10G06726.gene	Ghi_D12G12476.gene		Ghi_A01G09781.gene
Ghi_A11G14181.gene	Ghi_D12G14026.gene	Ghi_A13G08626.gene			Ghi_D06G06396.gene	Ghi_A05G16301.gene	Ghi_D10G00686.gene		Ghi_A12G15116.gene
Ghi_D07G11096.gene	Ghi_A07G05421.gene	Ghi_A13G02136.gene			Ghi_A05G23796.gene	Ghi_D07G04216.gene	Ghi_D13G03396.gene		Ghi_D05G00591.gene
Ghi_A05G10581.gene	Ghi_D07G11196.gene	Ghi_A12G05186.gene			Ghi_D12G12471.gene	Ghi_D04G05641.gene	Ghi_D04G09801.gene		Ghi_D06G09426.gene
Ghi_A05G10586.gene	Ghi_A07G01056.gene	Ghi_A07G01056.gene			Ghi_A09G13836.gene	Ghi_D11G05171.gene	Ghi_A01G09596.gene		Ghi_A12G14961.gene
Ghi_A01G01811.gene	Ghi_A07G01051.gene	Ghi_D06G00871.gene			Ghi_A12G05016.gene	Ghi_D02G01446.gene	Ghi_A04G01811.gene		Ghi_D12G15171.gene
Ghi_A02G07901.gene	Ghi_A05G04941.gene	Ghi_A06G08501.gene			Ghi_D07G01071.gene	Ghi_D03G09181.gene	Ghi_D08G06651.gene		Ghi_A03G07436.gene
Ghi_D06G09811.gene	Ghi_A07G00906.gene	Ghi_A06G10456.gene			Ghi_A06G04631.gene	Ghi_A04G06886.gene	Ghi_D08G06656.gene		Ghi_D06G04956.gene
Ghi_A10G12661.gene	Ghi_A08G11666.gene	Ghi_A12G09216.gene			Ghi_D11G13821.gene	Ghi_A02G10076.gene	Ghi_A05G09361.gene		Ghi_D06G00031.gene
Ghi_D01G05066.gene	Ghi_A05G20486.gene	Ghi_D02G07921.gene			Ghi_A01G02366.gene	Ghi_A04G06266.gene	Ghi_A11G01771.gene		Ghi_A07G04566.gene
Ghi_D05G14866.gene	Ghi_D08G14246.gene	Ghi_A10G03021.gene			Ghi_A04G07241.gene	Ghi_A03G02231.gene	Ghi_A13G07741.gene		Ghi_A13G11976.gene
Ghi_A01G06456.gene	Ghi_D08G10096.gene	Ghi_A10G03026.gene			Ghi_A01G10836.gene	Ghi_D12G02296.gene	Ghi_A06G05941.gene		Ghi_A08G09941.gene
Ghi_A12G07516.gene	Ghi_A12G14391.gene	Ghi_A01G02286.gene			Ghi_A04G07246.gene	Ghi_A12G13566.gene	Ghi_D10G05731.gene		Ghi_A13G03291.gene
Ghi_A02G03336.gene	Ghi_A10G03021.gene	Ghi_A11G13991.gene			Ghi_A05G01176.gene	Ghi_A09G11876.gene	Ghi_A03G09661.gene		Ghi_D10G00546.gene
Ghi_A08G07411.gene	Ghi_A02G09091.gene	Ghi_D05G03531.gene			Ghi_A05G09366.gene	Ghi_D09G08261.gene	Ghi_A09G03376.gene		Ghi_D12G08126.gene
Ghi_A13G05616.gene	Ghi_D08G07646.gene	Ghi_D08G00346.gene			Ghi_A08G08121.gene	Ghi_D02G10031.gene	Ghi_A11G01201.gene		Ghi_A06G03856.gene
Ghi_A09G12326.gene	Ghi_D11G05376.gene	Ghi_D11G18216.gene			Ghi_A07G07236.gene	Ghi_A02G03531.gene	Ghi_D04G00231.gene		Ghi_A05G15116.gene
Ghi_A03G13566.gene	Ghi_A12G12571.gene	Ghi_D09G11216.gene			Ghi_D12G15121.gene	Ghi_A06G01366.gene	Ghi_D11G08176.gene		Ghi_A03G00831.gene
Ghi_A01G05221.gene	Ghi_A01G08646.gene	Ghi_D07G01446.gene			Ghi_A04G00141.gene	Ghi_A11G01041.gene	Ghi_A10G01586.gene		Ghi_D13G08746.gene
Ghi_A07G11411.gene	Ghi_A10G00851.gene	Ghi_A06G11441.gene			Ghi_A05G08181.gene	Ghi_D03G10086.gene	Ghi_A04G05241.gene		Ghi_A07G12291.gene
Ghi_D10G13071.gene	Ghi_A05G01511.gene	Ghi_A01G05641.gene			Ghi_D07G06526.gene	Ghi_A05G12446.gene	Ghi_A03G13396.gene		Ghi_A10G01171.gene
Ghi_D07G04096.gene	Ghi_A10G04386.gene	Ghi_D12G04321.gene			Ghi_D10G07771.gene	Ghi_A11G10691.gene	Ghi_A01G05011.gene		Ghi_D03G09881.gene
Ghi_A06G11686.gene	Ghi_D13G03321.gene	Ghi_D11G10821.gene			Ghi_D07G12576.gene	Ghi_D01G03501.gene	Ghi_D05G00746.gene		Ghi_D06G12131.gene
Ghi_A02G01966.gene	Ghi_A12G03686.gene	Ghi_A10G00851.gene			Ghi_A13G02056.gene	Ghi_D12G01851.gene	Ghi_D13G07951.gene		Ghi_A12G03921.gene
Ghi_D01G02591.gene	Ghi_D06G10161.gene	Ghi_D12G12186.gene			Ghi_D08G03681.gene	Ghi_A07G01436.gene	Ghi_D10G08931.gene		Ghi_A05G17761.gene
Ghi_D01G02596.gene	Ghi_A02G07636.gene	Ghi_D01G01331.gene			Ghi_A05G07631.gene	Ghi_A12G11791.gene	Ghi_A13G12656.gene		Ghi_D09G05241.gene
Ghi_A01G01101.gene	Ghi_A07G02401.gene	Ghi_D11G02941.gene			Ghi_D11G14886.gene	Ghi_D13G12586.gene	Ghi_D02G03536.gene		Ghi_D12G15456.gene
Ghi_D02G11271.gene	Ghi_D05G09176.gene	Ghi_A01G10981.gene			Ghi_A11G00556.gene	Ghi_D02G07881.gene	Ghi_A05G16511.gene		Ghi_D11G17351.gene
Ghi_D02G11276.gene	Ghi_A05G22381.gene	Ghi_D01G09121.gene			Ghi_D11G14881.gene	Ghi_A02G03871.gene	Ghi_D05G01291.gene		Ghi_A02G09971.gene
Ghi_A01G05486.gene	Ghi_D10G11501.gene	Ghi_A01G04891.gene			Ghi_A11G06256.gene	Ghi_A07G03676.gene	Ghi_A06G11361.gene		Ghi_D12G00216.gene
Ghi_A01G05481.gene	Ghi_A12G10441.gene	Ghi_D13G12531.gene			Ghi_A11G06251.gene	Ghi_A03G13591.gene	Ghi_A05G02466.gene		Ghi_D09G04271.gene
Ghi_D05G12836.gene	Ghi_A07G12946.gene	Ghi_A02G07631.gene			Ghi_A10G01581.gene	Ghi_D05G00576.gene	Ghi_D04G02146.gene		Ghi_D10G11431.gene
Ghi_A01G00056.gene	Ghi_D09G05206.gene	Ghi_D12G03646.gene			Ghi_D06G00026.gene	Ghi_A01G03081.gene	Ghi_D11G12831.gene		Ghi_D08G12126.gene
Ghi_D13G01931.gene	Ghi_D05G01706.gene	Ghi_A08G14231.gene			Ghi_A05G07186.gene	Ghi_D02G06271.gene	Ghi_A13G14161.gene		Ghi_A01G04151.gene
Ghi_A06G01076.gene	Ghi_D03G06561.gene	Ghi_A10G13376.gene			Ghi_A08G09741.gene	Ghi_A10G02446.gene	Ghi_A12G13406.gene		Ghi_D12G13256.gene
Ghi_D01G03516.gene	Ghi_D05G14776.gene	Ghi_A10G12586.gene			Ghi_A02G00256.gene	Ghi_A12G04266.gene	Ghi_A06G08731.gene		Ghi_D02G09121.gene
Ghi_A10G09391.gene	Ghi_A05G23716.gene	Ghi_D10G10671.gene			Ghi_A08G05621.gene	Ghi_D04G02926.gene	Ghi_A12G13401.gene		Ghi_D05G06516.gene
Ghi_A10G09396.gene	Ghi_A11G11941.gene	Ghi_A05G11366.gene			Ghi_D04G03766.gene	Ghi_A13G01676.gene	Ghi_D12G12731.gene		Ghi_D11G01426.gene
Ghi_A06G07956.gene	Ghi_D05G01611.gene	Ghi_A05G13736.gene			Ghi_D05G09261.gene	Ghi_A08G03536.gene	Ghi_A13G01126.gene		Ghi_A12G00606.gene
Ghi_A12G15736.gene	Ghi_D05G01616.gene	Ghi_A12G10446.gene			Ghi_D05G07851.gene	Ghi_A05G10036.gene	Ghi_D03G09151.gene		Ghi_D05G10241.gene
Ghi_A01G11751.gene	Ghi_A05G12626.gene	Ghi_D09G05206.gene			Ghi_A13G10816.gene	Ghi_A08G04541.gene	Ghi_D12G07496.gene		Ghi_D01G07126.gene
Ghi_A06G06396.gene	Ghi_A09G08926.gene	Ghi_D08G09291.gene			Ghi_A05G12201.gene	Ghi_A01G05006.gene	Ghi_D03G00536.gene		Ghi_D11G15111.gene
Ghi_A03G12371.gene	Ghi_A05G09501.gene	Ghi_A10G09311.gene			Ghi_A04G06926.gene	Ghi_D10G00601.gene	Ghi_D09G10481.gene		Ghi_A07G06326.gene
Ghi_A09G04536.gene	Ghi_A10G01506.gene	Ghi_D02G11961.gene			Ghi_A08G03596.gene	Ghi_D10G04736.gene	Ghi_D09G05511.gene		Ghi_A05G01556.gene
Ghi_D05G04861.gene	Ghi_A04G07196.gene	Ghi_A08G02301.gene			Ghi_A05G02461.gene	Ghi_D05G10371.gene	Ghi_A11G06751.gene		Ghi_A11G06206.gene
Ghi_D05G04866.gene	Ghi_A04G03861.gene	Ghi_D05G01616.gene			Ghi_A12G11106.gene	Ghi_A07G02796.gene	Ghi_A13G06146.gene		Ghi_D10G00291.gene
Ghi_D09G05756.gene	Ghi_D04G01031.gene	Ghi_A10G02256.gene			Ghi_D10G12451.gene	Ghi_A06G12376.gene	Ghi_A05G23571.gene		Ghi_A07G10916.gene
Ghi_A03G01876.gene	Ghi_A12G13486.gene	Ghi_A08G04626.gene			Ghi_A09G11556.gene	Ghi_A08G11656.gene	Ghi_A03G01096.gene		Ghi_A08G01006.gene
Ghi_D07G03061.gene	Ghi_A09G11771.gene	Ghi_A11G00886.gene			Ghi_D12G14606.gene	Ghi_A11G18231.gene	Ghi_A07G13291.gene		Ghi_A11G01566.gene
Ghi_A11G16711.gene	Ghi_A08G11166.gene	Ghi_A05G21821.gene			Ghi_A07G00201.gene	Ghi_D03G01146.gene	Ghi_A12G15491.gene		Ghi_D01G06596.gene
Ghi_D05G10151.gene	Ghi_D12G15246.gene	Ghi_D11G15206.gene			Ghi_D02G08786.gene	Ghi_A05G16406.gene	Ghi_A03G09696.gene		Ghi_D02G10286.gene
Ghi_D07G06651.gene	Ghi_A09G09526.gene	Ghi_A04G07196.gene			Ghi_A12G00876.gene	Ghi_A12G11626.gene	Ghi_A11G10146.gene		Ghi_D11G09626.gene
Ghi_A09G12416.gene	Ghi_A02G00916.gene	Ghi_A10G08906.gene			Ghi_A08G15201.gene	Ghi_D11G06696.gene	Ghi_A13G09771.gene		Ghi_D03G09591.gene
Ghi_A01G05016.gene	Ghi_D12G08036.gene	Ghi_A05G17246.gene			Ghi_D05G00991.gene	Ghi_A11G17356.gene	Ghi_D08G09406.gene		Ghi_D02G11556.gene
Ghi_A09G14156.gene	Ghi_D05G03866.gene	Ghi_A10G14331.gene			Ghi_A11G07971.gene	Ghi_A02G00611.gene	Ghi_A05G08396.gene		Ghi_A02G06451.gene
Ghi_A10G08511.gene	Ghi_A13G01871.gene	Ghi_D09G01341.gene			Ghi_D02G06181.gene	Ghi_A12G02506.gene	Ghi_D03G08361.gene		Ghi_A13G12531.gene
Ghi_A11G04491.gene	Ghi_A13G01876.gene	Ghi_A08G11166.gene			Ghi_D05G14461.gene	Ghi_A08G13181.gene	Ghi_D03G08366.gene		Ghi_D05G13216.gene
Ghi_A08G11436.gene	Ghi_D08G08091.gene	Ghi_A04G01206.gene			Ghi_A06G09061.gene	Ghi_D05G15056.gene	Ghi_A12G07496.gene		Ghi_D04G09681.gene
Ghi_D12G12471.gene	Ghi_D01G01716.gene	Ghi_A02G00981.gene			Ghi_D09G11681.gene	Ghi_D11G09186.gene	Ghi_D02G11331.gene		Ghi_D11G05536.gene
Ghi_D12G12476.gene	Ghi_D09G11436.gene	Ghi_D05G11241.gene			Ghi_D10G13461.gene	Ghi_D04G02461.gene	Ghi_D01G01996.gene		Ghi_D12G08111.gene
Ghi_A09G13836.gene	Ghi_D09G11431.gene	Ghi_D05G03866.gene			Ghi_A05G11241.gene	Ghi_A01G12101.gene	Ghi_D07G04536.gene		Ghi_D12G04376.gene
Ghi_A12G05016.gene	Ghi_D02G04846.gene	Ghi_A13G01876.gene			Ghi_D06G12631.gene	Ghi_A10G14346.gene	Ghi_A11G17746.gene		Ghi_D02G01666.gene
Ghi_D07G01071.gene	Ghi_A06G12456.gene	Ghi_D01G01716.gene			Ghi_A01G05971.gene	Ghi_A13G09851.gene	Ghi_D10G02496.gene		Ghi_D13G08106.gene
Ghi_A06G04631.gene	Ghi_D01G02496.gene	Ghi_D09G11431.gene			Ghi_A12G06841.gene	Ghi_D13G04516.gene	Ghi_D10G02491.gene		Ghi_A12G15556.gene
Ghi_D10G00686.gene	Ghi_A05G22646.gene	Ghi_A01G06081.gene			Ghi_D03G03941.gene	Ghi_A01G02886.gene	Ghi_A09G07871.gene		Ghi_A07G01336.gene
Ghi_D13G03396.gene	Ghi_D05G12976.gene	Ghi_A07G14121.gene			Ghi_D06G08426.gene	Ghi_D10G01931.gene	Ghi_D13G06141.gene		Ghi_D08G09561.gene
Ghi_D04G09801.gene	Ghi_D03G09456.gene	Ghi_A13G14241.gene			Ghi_D05G11171.gene	Ghi_D05G13956.gene	Ghi_A08G05081.gene		Ghi_A13G02286.gene
Ghi_D11G13821.gene	Ghi_A02G09836.gene	Ghi_A05G05256.gene			Ghi_D11G05651.gene	Ghi_D12G14926.gene	Ghi_D05G05216.gene		Ghi_A06G11241.gene
Ghi_A01G09596.gene	Ghi_D05G11721.gene	Ghi_A02G08746.gene			Ghi_A06G01196.gene	Ghi_D02G09871.gene	Ghi_D11G09501.gene		Ghi_A07G12456.gene
Ghi_A01G02366.gene	Ghi_D06G12581.gene	Ghi_A03G03086.gene			Ghi_A02G01216.gene	Ghi_D13G09176.gene	Ghi_A06G06216.gene		Ghi_A09G14086.gene
Ghi_A04G01811.gene	Ghi_A10G08651.gene	Ghi_A05G11441.gene			Ghi_A10G02631.gene	Ghi_D11G00751.gene	Ghi_D10G09861.gene		Ghi_D10G12431.gene
Ghi_A04G07241.gene	Ghi_D08G12661.gene	Ghi_D09G05341.gene			Ghi_A09G00941.gene	Ghi_D09G08531.gene	Ghi_A03G00146.gene		Ghi_A10G10846.gene
Ghi_D08G06651.gene	Ghi_D05G00771.gene	Ghi_A01G03461.gene			Ghi_A03G01321.gene	Ghi_A09G14281.gene	Ghi_A05G24071.gene		Ghi_D01G00426.gene
Ghi_A05G01176.gene	Ghi_D08G07226.gene	Ghi_A12G09901.gene			Ghi_A12G08441.gene	Ghi_A08G14966.gene	Ghi_A11G04861.gene		Ghi_A13G01206.gene
Ghi_D08G06656.gene	Ghi_A03G05346.gene	Ghi_D06G01371.gene			Ghi_A01G00226.gene	Ghi_A05G19611.gene	Ghi_D09G08746.gene		Ghi_A05G06291.gene
Ghi_A05G09361.gene	Ghi_A03G10921.gene	Ghi_D06G12581.gene			Ghi_A12G04146.gene	Ghi_A09G01786.gene	Ghi_D13G11841.gene		Ghi_A12G13736.gene
Ghi_A05G09366.gene	Ghi_D10G05471.gene	Ghi_A10G02866.gene			Ghi_D05G06271.gene	Ghi_D11G03861.gene	Ghi_A09G07076.gene		Ghi_A11G09936.gene
Ghi_A08G08121.gene	Ghi_D04G09011.gene	Ghi_A09G00271.gene			Ghi_A05G13261.gene	Ghi_D05G02996.gene	Ghi_A04G06411.gene		Ghi_A09G05576.gene
Ghi_A07G07236.gene	Ghi_D06G00816.gene	Ghi_A09G05576.gene			Ghi_A02G02746.gene	Ghi_A03G13171.gene	Ghi_D13G10741.gene		Ghi_A07G11171.gene
Ghi_A11G01771.gene	Ghi_D11G08231.gene	Ghi_A10G10166.gene			Ghi_D10G11171.gene	Ghi_A13G14501.gene	Ghi_D06G02761.gene		Ghi_A07G05846.gene
Ghi_A13G07741.gene	Ghi_A05G14271.gene	Ghi_A08G09396.gene			Ghi_A01G00221.gene	Ghi_A02G00696.gene	Ghi_D02G09316.gene		Ghi_A12G13526.gene
Ghi_D12G15121.gene	Ghi_D06G09991.gene	Ghi_D12G10981.gene			Ghi_D06G10411.gene	Ghi_A08G00621.gene	Ghi_A13G00661.gene		Ghi_A05G09686.gene
Ghi_A06G05941.gene	Ghi_D07G10811.gene	Ghi_D04G03641.gene			Ghi_D05G07426.gene	Ghi_A11G18676.gene	Ghi_A03G11031.gene		Ghi_D01G10366.gene
Ghi_A04G00141.gene	Ghi_D12G02741.gene	Ghi_D11G17811.gene			Ghi_A08G07621.gene	Ghi_D07G09026.gene	Ghi_A11G04131.gene		Ghi_D02G04716.gene
Ghi_D10G05731.gene	Ghi_A10G05821.gene	Ghi_A09G07121.gene			Ghi_A08G07626.gene	Ghi_A12G02876.gene	Ghi_A03G02456.gene		Ghi_D09G05306.gene
Ghi_A03G09661.gene	Ghi_A09G13561.gene	Ghi_A09G13561.gene			Ghi_D07G04681.gene	Ghi_A04G07166.gene	Ghi_A05G06956.gene		Ghi_A03G00606.gene
Ghi_A05G08181.gene	Ghi_D11G09681.gene	Ghi_A07G10916.gene			Ghi_D01G01991.gene	Ghi_A06G09891.gene	Ghi_A11G06191.gene		Ghi_D11G02616.gene
Ghi_D07G06526.gene	Ghi_A07G13391.gene	Ghi_D11G02021.gene			Ghi_A05G01066.gene	Ghi_D12G04581.gene	Ghi_A11G06196.gene		Ghi_A10G13386.gene
Ghi_D10G07771.gene	Ghi_A12G15596.gene	Ghi_D11G02026.gene			Ghi_A12G07726.gene	Ghi_A09G00081.gene	Ghi_A01G11931.gene		Ghi_A01G11611.gene
Ghi_A13G02056.gene	Ghi_A07G00481.gene	Ghi_D11G04981.gene			Ghi_A11G10291.gene	Ghi_A03G01041.gene	Ghi_A06G11671.gene		Ghi_D09G06386.gene
Ghi_A05G07631.gene	Ghi_A03G01206.gene	Ghi_A03G01936.gene			Ghi_D07G04531.gene	Ghi_D06G12321.gene	Ghi_D05G08071.gene		Ghi_D12G13776.gene
Ghi_D11G14886.gene	Ghi_A12G08526.gene	Ghi_D11G08086.gene			Ghi_A08G00101.gene	Ghi_A05G15421.gene	Ghi_D01G03946.gene		Ghi_A12G13226.gene
Ghi_A11G00556.gene	Ghi_D03G09551.gene	Ghi_A12G12646.gene			Ghi_A03G13061.gene	Ghi_D03G02541.gene	Ghi_D12G14026.gene		Ghi_A03G08856.gene
Ghi_D11G14881.gene	Ghi_D11G01091.gene	Ghi_A03G01206.gene			Ghi_D10G04351.gene	Ghi_D09G04006.gene	Ghi_A13G14456.gene		Ghi_D12G15046.gene
Ghi_A09G03376.gene	Ghi_A06G08626.gene	Ghi_D05G06531.gene			Ghi_A01G08381.gene	Ghi_D13G00311.gene	Ghi_D12G00331.gene		Ghi_A03G11996.gene
Ghi_A11G06256.gene	Ghi_A03G06936.gene	Ghi_D05G06536.gene			Ghi_D13G00251.gene	Ghi_A03G02076.gene	Ghi_D05G08921.gene		Ghi_D10G08081.gene
Ghi_A11G01201.gene	Ghi_A01G04191.gene	Ghi_D05G14081.gene			Ghi_A09G06811.gene	Ghi_A08G06776.gene	Ghi_D09G09896.gene		Ghi_D09G08051.gene
Ghi_A11G06251.gene	Ghi_D01G04856.gene	Ghi_A03G12761.gene			Ghi_A07G02486.gene	Ghi_A11G04276.gene	Ghi_D07G11626.gene		Ghi_D02G04071.gene
Ghi_D11G10506.gene	Ghi_A04G04101.gene	Ghi_D07G09146.gene			Ghi_A11G12591.gene	Ghi_A09G01381.gene	Ghi_A01G09121.gene		Ghi_D12G00256.gene
Ghi_D04G00231.gene	Ghi_A01G10906.gene	Ghi_D05G12011.gene			Ghi_D08G05801.gene	Ghi_A03G10506.gene	Ghi_A05G05091.gene		Ghi_D02G04206.gene
Ghi_D11G08176.gene	Ghi_A05G04216.gene	Ghi_A05G19646.gene			Ghi_D05G03291.gene	Ghi_A04G06256.gene	Ghi_A07G01051.gene		Ghi_D11G05826.gene
Ghi_A10G01586.gene	Ghi_A10G04646.gene	Ghi_A01G04191.gene			Ghi_A10G09566.gene	Ghi_A02G04971.gene	Ghi_A05G04941.gene		Ghi_A01G02966.gene
Ghi_A10G01581.gene	Ghi_A02G07146.gene	Ghi_D12G13506.gene			Ghi_D06G01266.gene	Ghi_D09G11206.gene	Ghi_A08G11666.gene		Ghi_D13G01176.gene
Ghi_D06G00026.gene	Ghi_A13G06231.gene	Ghi_D01G08701.gene			Ghi_D12G13661.gene	Ghi_A06G03171.gene	Ghi_A02G02356.gene		Ghi_D06G09051.gene
Ghi_A04G05241.gene	Ghi_A11G09981.gene	Ghi_A04G04101.gene			Ghi_D10G08406.gene	Ghi_A05G05951.gene	Ghi_A07G10996.gene		Ghi_A13G13996.gene
Ghi_A05G07186.gene	Ghi_A02G02251.gene	Ghi_D12G12671.gene			Ghi_D04G03271.gene	Ghi_A11G08661.gene	Ghi_A12G13616.gene		Ghi_A08G10141.gene
Ghi_A03G13396.gene	Ghi_D04G01616.gene	Ghi_A09G14901.gene			Ghi_A06G00321.gene	Ghi_A05G06606.gene	Ghi_D09G01131.gene		Ghi_A05G20436.gene
Ghi_D12G07801.gene	Ghi_D11G14506.gene	Ghi_A01G12506.gene			Ghi_A04G07891.gene	Ghi_D07G12401.gene	Ghi_A05G10326.gene		Ghi_A05G09056.gene
Ghi_A08G09741.gene	Ghi_A05G04151.gene	Ghi_A10G04256.gene			Ghi_A11G04866.gene	Ghi_A02G02611.gene	Ghi_D08G10096.gene		Ghi_D12G12671.gene
Ghi_A02G00256.gene	Ghi_A05G10206.gene	Ghi_A05G15176.gene			Ghi_A08G09881.gene	Ghi_A03G12736.gene	Ghi_A03G03866.gene		Ghi_D09G06941.gene
Ghi_D06G00656.gene	Ghi_D12G03106.gene	Ghi_A10G01966.gene			Ghi_D12G02226.gene	Ghi_A02G03566.gene	Ghi_A06G10456.gene		Ghi_D11G16236.gene
Ghi_D05G00746.gene	Ghi_A03G09591.gene	Ghi_D13G00611.gene			Ghi_A07G01311.gene	Ghi_D05G13916.gene	Ghi_A04G02286.gene		Ghi_D03G02821.gene
Ghi_A08G05621.gene	Ghi_D03G07656.gene	Ghi_D05G08846.gene			Ghi_A05G09281.gene	Ghi_A07G13956.gene	Ghi_A03G01426.gene		Ghi_D12G00931.gene
Ghi_D13G07951.gene	Ghi_A05G22846.gene	Ghi_D01G10156.gene			Ghi_D12G15626.gene	Ghi_D01G09401.gene	Ghi_A07G13316.gene		Ghi_D12G04101.gene
Ghi_D04G03766.gene	Ghi_A02G08691.gene	Ghi_D04G02381.gene			Ghi_A09G06381.gene	Ghi_A09G02271.gene	Ghi_D03G06326.gene		Ghi_D07G00426.gene
Ghi_D05G09261.gene	Ghi_D08G06306.gene	Ghi_A12G12846.gene			Ghi_D08G02046.gene	Ghi_D12G01821.gene	Ghi_A01G04871.gene		Ghi_D11G11966.gene
Ghi_D10G08931.gene	Ghi_D01G05386.gene	Ghi_A05G04151.gene			Ghi_D08G02041.gene	Ghi_D10G13566.gene	Ghi_A10G13001.gene		Ghi_A06G01886.gene
Ghi_A13G12656.gene	Ghi_A07G11136.gene	Ghi_D03G04016.gene			Ghi_D10G05966.gene	Ghi_A07G12516.gene	Ghi_D08G07646.gene		Ghi_A07G03616.gene
Ghi_D05G07851.gene	Ghi_D12G14571.gene	Ghi_A06G08421.gene			Ghi_A09G03231.gene	Ghi_D03G02076.gene	Ghi_D05G03531.gene		Ghi_A11G05556.gene
Ghi_A13G10816.gene	Ghi_D10G07846.gene	Ghi_D10G03571.gene			Ghi_A05G12826.gene	Ghi_A12G07066.gene	Ghi_A09G08771.gene		Ghi_A10G13731.gene
Ghi_D02G03536.gene	Ghi_D01G03161.gene	Ghi_D11G11741.gene			Ghi_A09G06036.gene	Ghi_A01G02301.gene	Ghi_D08G00346.gene		Ghi_D03G07536.gene
Ghi_A05G16511.gene	Ghi_A11G04916.gene	Ghi_D06G11216.gene			Ghi_D04G10706.gene	Ghi_A06G11221.gene	Ghi_A05G18511.gene		Ghi_A05G21631.gene
Ghi_A05G12201.gene	Ghi_D13G10481.gene	Ghi_A12G03011.gene			Ghi_A05G01701.gene	Ghi_D06G02661.gene	Ghi_D11G05376.gene		Ghi_A06G04626.gene
Ghi_A04G06926.gene	Ghi_A03G01001.gene	Ghi_D09G02776.gene			Ghi_A05G04556.gene	Ghi_A05G21191.gene	Ghi_A12G12571.gene		Ghi_A10G02281.gene
Ghi_D05G01291.gene	Ghi_A05G00891.gene	Ghi_A03G02576.gene			Ghi_A08G08376.gene	Ghi_A11G18441.gene	Ghi_D05G05671.gene		Ghi_A06G07646.gene
Ghi_A08G03596.gene	Ghi_D12G15716.gene	Ghi_A08G01601.gene			Ghi_D12G07301.gene	Ghi_D03G02261.gene	Ghi_D08G00231.gene		Ghi_D12G04381.gene
Ghi_A06G11361.gene	Ghi_D09G07206.gene	Ghi_A01G03361.gene			Ghi_A10G01171.gene	Ghi_D10G13346.gene	Ghi_A08G07876.gene		Ghi_A10G05341.gene
Ghi_A05G02466.gene	Ghi_D13G10101.gene	Ghi_A05G03276.gene			Ghi_D12G10906.gene	Ghi_D05G11801.gene	Ghi_A06G02211.gene		Ghi_D09G06221.gene
Ghi_A05G02461.gene	Ghi_D09G04641.gene	Ghi_D11G03576.gene			Ghi_D12G10901.gene	Ghi_D05G10991.gene	Ghi_A12G09171.gene		Ghi_A12G06781.gene
Ghi_A12G11106.gene	Ghi_D03G00826.gene	Ghi_A02G08691.gene			Ghi_D08G10026.gene	Ghi_A05G10776.gene	Ghi_A04G05616.gene		Ghi_A06G09081.gene
Ghi_D10G10741.gene	Ghi_A05G06826.gene	Ghi_D06G04286.gene			Ghi_D03G07191.gene	Ghi_D02G01641.gene	Ghi_D11G17306.gene		Ghi_A05G11886.gene
Ghi_D04G02146.gene	Ghi_A04G05746.gene	Ghi_D05G02571.gene			Ghi_A13G13731.gene	Ghi_D07G03706.gene	Ghi_D06G02106.gene		Ghi_D12G08221.gene
Ghi_D11G12831.gene	Ghi_A10G11451.gene	Ghi_A08G09941.gene			Ghi_A02G00596.gene	Ghi_D12G04466.gene	Ghi_D01G03676.gene		Ghi_A04G07201.gene
Ghi_D10G12451.gene	Ghi_A01G12561.gene	Ghi_A11G17986.gene			Ghi_A07G05421.gene	Ghi_A06G00036.gene	Ghi_D13G01441.gene		Ghi_D13G07521.gene
Ghi_A13G14161.gene	Ghi_A07G13741.gene	Ghi_D07G09331.gene			Ghi_D13G12181.gene	Ghi_A03G00456.gene	Ghi_D11G10826.gene		Ghi_D05G04101.gene
Ghi_A09G11556.gene	Ghi_A12G12141.gene	Ghi_D11G00686.gene			Ghi_D13G01686.gene	Ghi_A09G07086.gene	Ghi_A01G08646.gene		Ghi_D10G12186.gene
Ghi_D12G14606.gene	Ghi_D04G01811.gene	Ghi_D12G14571.gene			Ghi_A13G08626.gene	Ghi_A09G00736.gene	Ghi_A05G02836.gene		Ghi_D06G09331.gene
Ghi_A12G13406.gene	Ghi_D01G02411.gene	Ghi_A11G02516.gene			Ghi_A03G06206.gene	Ghi_A05G07026.gene	Ghi_A01G12016.gene		Ghi_A11G13991.gene
Ghi_A07G00201.gene	Ghi_A05G02361.gene	Ghi_A11G16166.gene			Ghi_A13G02136.gene	Ghi_D07G12811.gene	Ghi_A02G07391.gene		Ghi_D01G11206.gene
Ghi_A06G08731.gene	Ghi_A03G08926.gene	Ghi_D13G10481.gene			Ghi_A12G05186.gene	Ghi_D12G04691.gene	Ghi_A10G00851.gene		Ghi_A11G06446.gene
Ghi_A12G13401.gene	Ghi_D08G04206.gene	Ghi_D07G00686.gene			Ghi_D07G10576.gene	Ghi_D07G10316.gene	Ghi_D12G12181.gene		Ghi_D10G12826.gene
Ghi_D12G12731.gene	Ghi_A05G16181.gene	Ghi_A05G00891.gene			Ghi_A13G14826.gene	Ghi_D01G09601.gene	Ghi_D12G12186.gene		Ghi_D13G12866.gene
Ghi_D02G08786.gene	Ghi_D11G06406.gene	Ghi_D12G15716.gene			Ghi_D07G11196.gene	Ghi_A11G02201.gene	Ghi_A01G12581.gene		Ghi_A05G14676.gene
Ghi_A12G00876.gene	Ghi_A06G11401.gene	Ghi_A09G13516.gene			Ghi_D03G08166.gene	Ghi_A09G00161.gene	Ghi_A10G05511.gene		Ghi_D06G11451.gene
Ghi_A08G15201.gene	Ghi_D05G10926.gene	Ghi_A12G03256.gene			Ghi_D12G13346.gene	Ghi_A05G05851.gene	Ghi_A10G04386.gene		Ghi_A11G05901.gene
Ghi_D05G00991.gene	Ghi_A13G11756.gene	Ghi_D01G11441.gene			Ghi_A07G04481.gene	Ghi_A02G06866.gene	Ghi_A01G10981.gene		Ghi_D04G07466.gene
Ghi_A11G07971.gene	Ghi_D03G05096.gene	Ghi_D13G10101.gene			Ghi_A07G00906.gene	Ghi_A12G11166.gene	Ghi_A09G02881.gene		Ghi_D06G08626.gene
Ghi_D03G09151.gene	Ghi_D13G01531.gene	Ghi_D11G15121.gene			Ghi_A05G22221.gene	Ghi_D09G11516.gene	Ghi_A12G02081.gene		Ghi_D12G10101.gene
Ghi_D05G14461.gene	Ghi_D02G06716.gene	Ghi_D11G10331.gene			Ghi_A05G21756.gene	Ghi_A05G05441.gene	Ghi_A01G04891.gene		Ghi_D06G05756.gene
Ghi_A06G09061.gene	Ghi_A02G04921.gene	Ghi_D09G04641.gene			Ghi_A08G11661.gene	Ghi_A06G05576.gene	Ghi_D13G03321.gene		Ghi_D06G08886.gene
Ghi_D09G11681.gene	Ghi_A08G02966.gene	Ghi_A05G16301.gene			Ghi_A12G12961.gene	Ghi_A13G00446.gene	Ghi_D06G10161.gene		Ghi_A04G05786.gene
Ghi_D10G13461.gene	Ghi_D11G05816.gene	Ghi_A13G13821.gene			Ghi_A05G13671.gene	Ghi_A01G08201.gene	Ghi_D02G08656.gene		Ghi_D03G04016.gene
Ghi_A05G11241.gene	Ghi_D11G05811.gene	Ghi_A11G15376.gene			Ghi_D06G00871.gene	Ghi_D05G05746.gene	Ghi_A04G04201.gene		Ghi_A04G04831.gene
Ghi_D12G07496.gene	Ghi_D12G09961.gene	Ghi_D03G07561.gene			Ghi_D04G09081.gene	Ghi_A06G12171.gene	Ghi_D13G05236.gene		Ghi_D05G07886.gene
Ghi_A12G11646.gene	Ghi_A09G07351.gene	Ghi_A05G22536.gene			GhiUnG01561.gene	Ghi_D05G00916.gene	Ghi_A11G07636.gene		Ghi_D08G07281.gene
Ghi_D03G00536.gene	Ghi_A03G02226.gene	Ghi_A03G08926.gene			Ghi_A11G17506.gene	Ghi_D09G11336.gene	Ghi_A11G07631.gene		Ghi_A05G21911.gene
Ghi_D06G12631.gene	Ghi_A07G04841.gene	Ghi_A07G03716.gene			Ghi_A13G08576.gene	Ghi_A08G15221.gene	Ghi_D06G11416.gene		Ghi_A12G15456.gene
Ghi_D09G05511.gene	Ghi_A07G04846.gene	Ghi_A10G11096.gene			Ghi_D12G08561.gene	Ghi_D10G06201.gene	Ghi_A12G05686.gene		Ghi_D09G09041.gene
Ghi_A11G06751.gene	Ghi_D11G16881.gene	Ghi_A05G20026.gene			Ghi_A08G04846.gene	Ghi_A03G03646.gene	Ghi_A02G07631.gene		Ghi_D12G03646.gene
Ghi_A13G06146.gene	Ghi_A05G07586.gene	Ghi_D11G06406.gene			Ghi_A06G08501.gene	Ghi_A05G21576.gene	Ghi_A02G07636.gene		Ghi_A13G01851.gene
Ghi_D03G03941.gene	Ghi_A05G06676.gene	Ghi_A09G05641.gene			Ghi_A05G20486.gene	Ghi_A10G13261.gene	Ghi_D12G04041.gene		Ghi_D09G01341.gene
Ghi_D06G08426.gene	Ghi_D03G01346.gene	Ghi_A06G11501.gene			Ghi_D06G11081.gene	Ghi_D10G09596.gene	Ghi_D09G11576.gene		Ghi_A08G11736.gene
Ghi_D05G11176.gene	Ghi_D13G12221.gene	Ghi_A03G13656.gene			Ghi_A05G20156.gene	Ghi_D13G11861.gene	Ghi_D12G01496.gene		Ghi_D13G07131.gene
Ghi_A05G23571.gene	Ghi_A08G06526.gene	Ghi_D07G00801.gene			Ghi_D08G14246.gene	Ghi_D01G03921.gene	Ghi_D02G05541.gene		Ghi_D04G07856.gene
Ghi_D11G05651.gene	Ghi_D13G06911.gene	Ghi_D07G04361.gene			GhiUnG01191.gene	Ghi_A06G00126.gene	Ghi_A13G13941.gene		Ghi_A02G03851.gene
Ghi_A06G01196.gene	Ghi_D13G06916.gene	Ghi_D11G06896.gene			Ghi_A09G09956.gene	Ghi_A03G11011.gene	Ghi_A11G11201.gene		Ghi_A01G01881.gene
Ghi_A02G01216.gene	Ghi_D09G06371.gene	Ghi_A04G06261.gene			Ghi_A12G09216.gene	Ghi_A09G05511.gene	Ghi_A05G22381.gene		Ghi_A01G08381.gene
Ghi_A03G01096.gene	Ghi_A11G11371.gene	Ghi_A02G03401.gene			Ghi_D02G07921.gene	Ghi_A12G13941.gene	Ghi_A12G15681.gene		Ghi_D01G06116.gene
Ghi_A07G13291.gene	Ghi_A07G14001.gene	Ghi_D09G09651.gene			Ghi_A12G14391.gene	Ghi_D12G07986.gene	Ghi_D10G11501.gene		Ghi_D07G10891.gene
Ghi_A10G02631.gene	Ghi_A07G05721.gene	Ghi_D01G07126.gene			Ghi_D01G09881.gene	Ghi_D07G12561.gene	Ghi_A10G12586.gene		Ghi_D04G09871.gene
Ghi_A12G15491.gene	Ghi_A05G19396.gene	Ghi_D11G05816.gene			Ghi_A10G03021.gene	Ghi_A12G00336.gene	Ghi_A05G11366.gene		Ghi_A13G00361.gene
Ghi_A03G09696.gene	Ghi_A10G09406.gene	Ghi_D11G05811.gene			Ghi_A03G02736.gene	Ghi_A07G11001.gene	Ghi_A10G10886.gene		Ghi_D07G10511.gene
Ghi_A03G01321.gene	Ghi_A13G14426.gene	Ghi_A05G16976.gene			Ghi_A02G09091.gene	Ghi_A11G08121.gene	Ghi_A07G10681.gene		Ghi_D08G10291.gene
Ghi_A11G10146.gene	Ghi_A03G02141.gene	Ghi_D11G08006.gene			Ghi_A01G03156.gene	Ghi_A09G09971.gene	Ghi_A06G09556.gene		Ghi_D08G00991.gene
Ghi_A12G08441.gene	Ghi_A11G03031.gene	Ghi_A05G06676.gene			Ghi_A10G03796.gene	Ghi_D05G00651.gene	Ghi_A12G10441.gene		Ghi_D10G10671.gene
Ghi_A13G09771.gene	Ghi_A13G02091.gene	Ghi_A05G14606.gene			Ghi_A01G02286.gene	Ghi_A01G02266.gene	Ghi_A05G13881.gene		Ghi_A05G06121.gene
Ghi_A01G00226.gene	Ghi_A09G04481.gene	Ghi_A01G06616.gene			Ghi_A13G14476.gene	Ghi_D01G07931.gene	Ghi_D10G02226.gene		Ghi_D10G13326.gene
Ghi_D08G09406.gene	Ghi_D05G10681.gene	Ghi_A05G10611.gene			Ghi_A11G13991.gene	Ghi_D03G05371.gene	Ghi_A06G07331.gene		Ghi_A03G04811.gene
Ghi_A12G04146.gene	Ghi_A11G15316.gene	Ghi_A07G05721.gene			Ghi_A11G12026.gene	Ghi_D01G03061.gene	Ghi_D05G14776.gene		Ghi_A13G10871.gene
Ghi_D05G06271.gene	Ghi_A04G00786.gene	Ghi_A12G07681.gene			Ghi_D01G07911.gene	Ghi_A04G00411.gene	Ghi_D05G11686.gene		Ghi_A11G07041.gene
Ghi_A05G13261.gene	Ghi_A04G00251.gene	Ghi_A13G01441.gene			Ghi_A07G09261.gene	Ghi_A07G13681.gene	Ghi_D02G11961.gene		Ghi_D02G01281.gene
Ghi_A01G00221.gene	Ghi_A09G08816.gene	Ghi_A05G05516.gene			Ghi_A08G07121.gene	Ghi_A05G10566.gene	Ghi_A10G03616.gene		Ghi_D03G05926.gene
Ghi_D06G10411.gene	Ghi_D06G00226.gene	Ghi_A10G13791.gene			Ghi_A11G09881.gene	Ghi_D13G07621.gene	Ghi_D06G08741.gene		Ghi_A04G05811.gene
Ghi_D07G10776.gene	Ghi_A10G04161.gene	Ghi_A12G10881.gene			Ghi_D01G01076.gene	Ghi_D04G03091.gene	Ghi_A11G11941.gene		Ghi_D08G04346.gene
Ghi_A05G08396.gene	Ghi_D11G17916.gene	Ghi_D01G10566.gene			Ghi_D11G18216.gene	Ghi_D01G02536.gene	Ghi_A02G00736.gene		Ghi_D12G07761.gene
Ghi_D05G07426.gene	Ghi_A06G01766.gene	Ghi_A05G11561.gene			Ghi_A05G08061.gene	Ghi_A06G10531.gene	Ghi_D02G02016.gene		Ghi_A13G02766.gene
Ghi_D03G08361.gene	Ghi_D10G10101.gene	Ghi_A07G10781.gene			Ghi_A08G08571.gene	Ghi_D11G06291.gene	Ghi_D05G13796.gene		Ghi_A07G11831.gene
Ghi_A08G07621.gene	Ghi_A07G05121.gene	Ghi_D03G00631.gene			Ghi_D06G06936.gene	Ghi_D07G04431.gene	Ghi_A01G08931.gene		Ghi_A10G08551.gene
Ghi_A08G07626.gene	Ghi_A05G05351.gene	Ghi_A09G10916.gene			Ghi_D09G11216.gene	Ghi_A05G23196.gene	Ghi_A13G00126.gene		Ghi_D12G00581.gene
Ghi_D03G08366.gene	Ghi_D09G11316.gene	Ghi_A02G09971.gene			Ghi_D11G07611.gene	Ghi_D05G04701.gene	Ghi_D05G01616.gene		Ghi_A03G11541.gene
Ghi_A12G07496.gene	Ghi_D13G02876.gene	Ghi_D07G02646.gene			Ghi_A03G12271.gene	Ghi_D01G07751.gene	Ghi_A03G04736.gene		Ghi_D10G12871.gene
Ghi_D02G11331.gene	Ghi_A13G04101.gene	Ghi_D06G07536.gene			Ghi_A02G09511.gene	Ghi_A05G03146.gene	Ghi_A05G09501.gene		Ghi_D02G12091.gene
Ghi_D01G01991.gene	Ghi_D03G03836.gene	Ghi_A13G02091.gene			Ghi_D08G10226.gene	Ghi_A02G01486.gene	Ghi_A10G02251.gene		Ghi_D08G13001.gene
Ghi_D01G01996.gene	Ghi_A13G13331.gene	Ghi_A01G07931.gene			Ghi_A01G10531.gene	Ghi_D05G08636.gene	Ghi_D05G14731.gene		Ghi_D02G10496.gene
Ghi_A05G01066.gene	Ghi_A07G13671.gene	Ghi_A09G08816.gene			Ghi_D01G05406.gene	Ghi_D04G03626.gene	Ghi_A10G01506.gene		Ghi_A04G06771.gene
Ghi_A12G07726.gene	Ghi_A07G02106.gene	Ghi_A07G01506.gene			Ghi_D07G01446.gene	Ghi_A07G04136.gene	Ghi_A11G02246.gene		Ghi_D04G09181.gene
Ghi_A11G10291.gene	Ghi_A12G07521.gene	Ghi_A09G04301.gene			Ghi_D10G07056.gene	Ghi_D09G09636.gene	Ghi_A05G21821.gene		Ghi_A13G03326.gene
Ghi_D07G04536.gene	Ghi_A01G05211.gene	Ghi_D03G10081.gene			Ghi_A01G05396.gene	Ghi_A10G05841.gene	Ghi_D11G15201.gene		Ghi_D05G00716.gene
Ghi_D07G04531.gene	Ghi_A08G03216.gene	Ghi_A13G00456.gene			Ghi_A06G11441.gene	Ghi_A05G16991.gene	Ghi_D11G15206.gene		Ghi_D09G05041.gene
Ghi_A11G17746.gene	Ghi_A13G03501.gene	Ghi_A02G10136.gene			Ghi_A01G05391.gene	Ghi_A06G01126.gene	Ghi_A04G07196.gene		Ghi_A05G16976.gene
Ghi_A08G00101.gene	Ghi_A03G01666.gene	Ghi_D02G09011.gene			Ghi_D11G17301.gene	Ghi_A12G08891.gene	Ghi_A05G06506.gene		Ghi_A10G05036.gene
Ghi_D10G02496.gene	Ghi_A09G15146.gene	Ghi_A12G10911.gene			Ghi_A13G11966.gene	Ghi_A09G14416.gene	Ghi_A13G07076.gene		Ghi_A05G06016.gene
Ghi_D10G02491.gene	Ghi_A06G07901.gene	Ghi_A13G14051.gene			Ghi_A12G14206.gene	Ghi_D07G02111.gene	Ghi_A10G08901.gene		Ghi_D04G09066.gene
Ghi_A09G07871.gene	Ghi_D05G09951.gene	Ghi_A03G02386.gene			Ghi_D01G06271.gene	Ghi_D07G01836.gene	Ghi_D05G09406.gene		Ghi_A01G02716.gene
Ghi_D10G04351.gene	Ghi_D06G03586.gene	Ghi_A08G14461.gene			Ghi_A01G05641.gene	Ghi_A04G00236.gene	Ghi_A09G11036.gene		Ghi_D13G01446.gene
Ghi_D13G06141.gene	Ghi_D01G01746.gene	Ghi_A13G13331.gene			Ghi_D12G04321.gene	Ghi_D04G00541.gene	Ghi_A04G03866.gene		Ghi_D12G04241.gene
Ghi_A08G05081.gene	Ghi_A11G00526.gene	Ghi_A03G00831.gene			Ghi_A08G05431.gene	Ghi_A07G04586.gene	Ghi_A11G14901.gene		Ghi_A05G21201.gene
Ghi_D13G00251.gene	Ghi_A05G12951.gene	Ghi_A02G02586.gene			Ghi_A09G01176.gene	Ghi_A09G11956.gene	Ghi_D01G09741.gene		Ghi_A05G00486.gene
Ghi_D05G05216.gene	Ghi_A05G12956.gene	Ghi_A03G12641.gene			Ghi_A11G02381.gene	Ghi_D02G00846.gene	Ghi_D04G01036.gene		Ghi_A11G05406.gene
Ghi_A09G06811.gene	Ghi_A11G09251.gene	Ghi_A02G02911.gene			Ghi_A11G02386.gene	Ghi_D03G05281.gene	GhiUnG01936.gene		Ghi_A03G00306.gene
Ghi_A07G02486.gene	Ghi_A11G09256.gene	Ghi_D05G01986.gene			Ghi_D06G01456.gene	Ghi_D06G09056.gene	Ghi_A06G09586.gene		Ghi_A13G01186.gene
Ghi_A11G12591.gene	Ghi_A05G23561.gene	Ghi_D12G11151.gene			Ghi_D11G10821.gene	Ghi_A13G04286.gene	Ghi_A07G01486.gene		Ghi_D06G01096.gene
Ghi_D08G05801.gene	Ghi_A10G11181.gene	Ghi_A05G20886.gene			Ghi_A10G11486.gene	Ghi_A11G02436.gene	Ghi_A07G04056.gene
Ghi_D11G09501.gene	Ghi_D05G05791.gene	Ghi_D09G04471.gene			Ghi_A07G01296.gene	Ghi_D12G15191.gene	Ghi_A12G13486.gene
Ghi_D05G03291.gene	Ghi_D12G15921.gene	Ghi_A03G10101.gene			Ghi_D07G13146.gene	Ghi_D11G16416.gene	Ghi_A09G11771.gene
Ghi_A10G09566.gene	Ghi_A07G01161.gene	Ghi_A13G09311.gene			Ghi_A01G12361.gene	Ghi_A01G11866.gene	Ghi_A08G11166.gene
Ghi_A06G06216.gene	Ghi_A06G03671.gene	Ghi_A06G07011.gene			Ghi_D07G07236.gene	Ghi_A09G15026.gene	Ghi_A11G02361.gene
Ghi_D06G01266.gene	Ghi_A06G08746.gene	Ghi_A09G13846.gene			Ghi_D12G05581.gene	Ghi_D03G07481.gene	Ghi_A09G13916.gene
Ghi_D10G09861.gene	Ghi_D09G00151.gene	Ghi_D06G04871.gene			Ghi_A11G02891.gene	Ghi_D01G07806.gene	Ghi_D04G00076.gene
Ghi_D03G05206.gene	Ghi_D06G11311.gene	Ghi_D07G01951.gene			Ghi_A07G08396.gene	Ghi_D11G17216.gene	Ghi_D02G02876.gene
Ghi_A03G00146.gene	Ghi_D05G11141.gene	Ghi_A07G00751.gene			Ghi_D01G07006.gene	Ghi_A07G03921.gene	Ghi_A02G01291.gene
Ghi_D12G13661.gene	Ghi_A08G06851.gene	Ghi_A05G12956.gene			Ghi_A01G09206.gene	Ghi_A01G05441.gene	Ghi_A05G03166.gene
Ghi_D10G08406.gene	Ghi_D08G04911.gene	Ghi_A10G04726.gene			Ghi_A01G09201.gene	Ghi_D06G09796.gene	Ghi_A13G01871.gene
Ghi_D04G03271.gene	Ghi_D01G08026.gene	Ghi_D04G05776.gene			Ghi_D01G01331.gene	Ghi_A07G08486.gene	Ghi_A01G03871.gene
Ghi_A05G24071.gene	Ghi_A08G00841.gene	Ghi_A02G07776.gene			Ghi_A07G07926.gene	Ghi_A09G03461.gene	Ghi_D08G08091.gene
Ghi_A04G07891.gene	Ghi_D12G02211.gene	Ghi_A11G06206.gene			Ghi_D12G06771.gene	Ghi_A07G13206.gene	Ghi_D07G07526.gene
Ghi_A11G04861.gene	Ghi_A05G11826.gene	Ghi_D05G07521.gene			Ghi_A05G01511.gene	Ghi_D07G01641.gene	Ghi_D09G11431.gene
Ghi_A11G04866.gene	Ghi_D13G11816.gene	Ghi_A10G11181.gene			Ghi_D11G02941.gene	Ghi_D10G13046.gene	Ghi_D13G04521.gene
Ghi_D09G08746.gene	Ghi_D13G13556.gene	Ghi_A05G11736.gene			Ghi_D01G09121.gene	Ghi_D10G11671.gene	Ghi_D03G07146.gene
Ghi_D13G11841.gene	Ghi_A05G09101.gene	Ghi_D11G12861.gene			Ghi_A12G03686.gene	Ghi_A07G04476.gene	Ghi_A06G12456.gene
Ghi_A09G07076.gene	GhiUnG03211.gene	Ghi_A09G12851.gene			Ghi_D02G08651.gene	Ghi_D02G06976.gene	Ghi_A01G07686.gene
Ghi_A04G06411.gene	Ghi_A11G02886.gene	Ghi_A03G09851.gene			Ghi_D13G12531.gene	Ghi_A03G02166.gene	Ghi_A12G07411.gene
Ghi_A04G06416.gene	Ghi_D12G07336.gene	Ghi_D10G12461.gene			Ghi_D13G12536.gene	Ghi_D05G15171.gene	Ghi_A03G03626.gene
Ghi_D05G01246.gene	Ghi_D06G11261.gene	Ghi_A12G00226.gene			Ghi_D06G11411.gene	Ghi_A11G13761.gene	Ghi_D01G03876.gene
Ghi_D13G10741.gene	Ghi_D12G01651.gene	Ghi_D06G11311.gene			Ghi_D12G09556.gene	Ghi_D08G06376.gene	Ghi_D01G02496.gene
Ghi_A08G09881.gene	Ghi_D10G07556.gene	Ghi_A01G04011.gene			Ghi_D12G03646.gene	Ghi_A05G23751.gene	Ghi_A05G22646.gene
Ghi_D12G02226.gene	Ghi_A12G00406.gene	Ghi_D02G00271.gene			Ghi_A10G06721.gene	Ghi_D08G14521.gene	Ghi_D05G12976.gene
Ghi_A07G01311.gene	Ghi_A01G10036.gene	Ghi_D11G09776.gene			Ghi_D13G01161.gene	Ghi_D13G08736.gene	Ghi_D03G09456.gene
Ghi_A05G09281.gene	Ghi_A09G11096.gene	Ghi_D01G11206.gene			Ghi_A02G02576.gene	Ghi_D06G02196.gene	Ghi_A02G09836.gene
Ghi_D06G02761.gene	Ghi_D02G11701.gene	Ghi_D11G08426.gene			Ghi_A03G00571.gene	Ghi_D05G05091.gene	Ghi_D11G07171.gene
Ghi_D02G09316.gene	Ghi_A11G10026.gene	Ghi_D08G12041.gene			Ghi_A07G02401.gene	Ghi_A09G13526.gene	Ghi_A02G09831.gene
Ghi_D12G15626.gene	Ghi_D09G08021.gene	Ghi_D08G04911.gene			Ghi_A08G14236.gene	Ghi_A08G01111.gene	Ghi_A10G13276.gene
Ghi_A13G00661.gene	Ghi_A12G00381.gene	Ghi_D01G04516.gene			Ghi_A08G14231.gene	Ghi_D10G12261.gene	Ghi_D04G10901.gene
Ghi_A04G01996.gene	Ghi_D11G10201.gene	Ghi_D01G03906.gene			Ghi_A09G12426.gene	Ghi_A05G07596.gene	Ghi_A08G00181.gene
Ghi_A03G11031.gene	Ghi_A01G03166.gene	Ghi_D13G00836.gene			Ghi_A12G15686.gene	Ghi_A09G13826.gene	Ghi_A08G00186.gene
Ghi_A09G06381.gene	Ghi_D05G13551.gene	Ghi_D01G05646.gene			Ghi_D05G09176.gene	Ghi_A05G09316.gene	Ghi_D03G05411.gene
Ghi_A11G04131.gene	Ghi_D02G01816.gene	Ghi_A03G03526.gene			Ghi_A13G09941.gene	Ghi_A04G00176.gene	Ghi_A01G00841.gene
Ghi_D10G05966.gene	Ghi_D02G08596.gene	Ghi_D11G06811.gene			Ghi_D02G04141.gene	Ghi_A11G07511.gene	Ghi_A08G07356.gene
Ghi_A03G02456.gene	Ghi_A09G04656.gene	Ghi_D10G07591.gene			Ghi_A02G07531.gene	Ghi_A07G03451.gene	Ghi_D08G07951.gene
Ghi_A05G12826.gene	Ghi_D02G01091.gene	Ghi_A01G04751.gene			Ghi_D06G09896.gene	Ghi_D09G09526.gene	Ghi_D01G04951.gene
Ghi_A09G06036.gene	Ghi_A10G02016.gene	Ghi_A08G01846.gene			Ghi_D06G09891.gene	Ghi_D03G09121.gene	Ghi_A08G09801.gene
Ghi_A05G01701.gene	Ghi_D01G00936.gene	Ghi_A11G16976.gene			Ghi_A03G09246.gene	Ghi_A03G07451.gene	Ghi_A03G10071.gene
Ghi_A05G04556.gene	Ghi_A12G04366.gene	Ghi_A07G00096.gene			Ghi_A12G12376.gene	Ghi_A08G13086.gene	Ghi_D01G00186.gene
Ghi_A08G08376.gene	Ghi_A10G09351.gene	Ghi_A05G01756.gene			Ghi_A10G12021.gene	Ghi_D03G09681.gene	Ghi_D05G01796.gene
Ghi_D12G07301.gene	Ghi_D04G02726.gene	Ghi_A05G09101.gene			Ghi_A12G12371.gene	Ghi_D10G07946.gene	Ghi_D08G12661.gene
Ghi_D12G10906.gene	Ghi_D07G05556.gene	Ghi_D08G13546.gene			Ghi_A10G13376.gene	Ghi_A09G06806.gene	Ghi_A01G06946.gene
Ghi_D12G10901.gene	Ghi_D13G01471.gene	Ghi_A10G05036.gene			Ghi_A05G14691.gene	Ghi_D01G03911.gene	Ghi_A09G08066.gene
Ghi_A11G06191.gene	Ghi_D11G17086.gene	Ghi_A05G14351.gene			Ghi_A05G14696.gene	Ghi_A04G06426.gene	Ghi_D08G07226.gene
Ghi_A11G06196.gene	Ghi_A05G08866.gene	Ghi_A05G22436.gene			Ghi_A13G01536.gene	Ghi_A04G06421.gene	Ghi_A03G05346.gene
Ghi_A01G11931.gene	Ghi_A01G04391.gene	Ghi_D06G11261.gene			Ghi_D10G10671.gene	Ghi_D05G01276.gene	Ghi_A10G03406.gene
Ghi_A06G11671.gene	Ghi_A07G01536.gene	Ghi_A05G14681.gene			Ghi_A10G12681.gene	Ghi_A11G09741.gene	Ghi_A09G05571.gene
Ghi_D05G08071.gene	Ghi_A11G01596.gene	Ghi_A12G00406.gene			Ghi_A03G04476.gene	Ghi_A11G01516.gene	Ghi_A09G05576.gene
Ghi_D01G03946.gene	Ghi_A02G00616.gene	Ghi_A07G13026.gene			Ghi_D03G08731.gene	Ghi_A10G11861.gene	Ghi_D10G05471.gene
Ghi_D08G10026.gene	Ghi_D03G08311.gene	Ghi_A05G06016.gene			Ghi_A05G13736.gene	Ghi_D12G11826.gene	Ghi_D05G12566.gene
Ghi_D03G07191.gene	Ghi_A02G01051.gene	Ghi_D11G12121.gene			Ghi_D03G04636.gene	Ghi_D13G11551.gene	Ghi_A11G06116.gene
Ghi_D12G14026.gene	Ghi_A11G14161.gene	Ghi_A05G10696.gene			Ghi_A12G10446.gene	Ghi_D04G08151.gene	Ghi_D08G03836.gene
Ghi_A13G13731.gene	Ghi_A03G13451.gene	Ghi_A07G00931.gene			Ghi_A05G21121.gene	Ghi_D05G05566.gene	Ghi_D08G03831.gene
Ghi_A02G00596.gene	Ghi_A07G12581.gene	Ghi_A07G00936.gene			Ghi_A07G12946.gene	Ghi_A13G12606.gene	Ghi_A12G01581.gene
Ghi_A13G14456.gene	Ghi_A12G15651.gene	Ghi_D09G08021.gene			Ghi_D10G02221.gene	Ghi_D04G10881.gene	Ghi_A08G04016.gene
Ghi_D12G00331.gene	Ghi_A05G03816.gene	GhiUnG01536.gene			Ghi_D09G05206.gene	Ghi_D10G03026.gene	Ghi_D05G07481.gene
Ghi_A07G05421.gene	Ghi_A03G02776.gene	Ghi_A08G15021.gene			Ghi_A05G10281.gene	Ghi_A02G08931.gene	Ghi_A10G11696.gene
Ghi_D13G12181.gene	Ghi_A08G08811.gene	Ghi_D09G04821.gene			Ghi_D08G09291.gene	Ghi_A13G04561.gene	Ghi_A04G03986.gene
Ghi_A13G08626.gene	Ghi_A01G01156.gene	Ghi_A07G13346.gene			Ghi_D02G06176.gene	Ghi_A05G12251.gene	Ghi_D06G00816.gene
Ghi_D05G08921.gene	Ghi_D03G05041.gene	Ghi_D05G13551.gene			Ghi_D06G03536.gene	Ghi_D11G18266.gene	Ghi_D11G08231.gene
Ghi_A03G06206.gene	Ghi_D10G00091.gene	Ghi_A04G07086.gene			Ghi_D05G01706.gene	Ghi_D06G03991.gene	Ghi_A13G12466.gene
Ghi_D09G09896.gene	Ghi_A01G07871.gene	Ghi_D05G01576.gene			Ghi_A10G09311.gene	Ghi_D08G10231.gene	Ghi_A05G12566.gene
Ghi_A13G02136.gene	Ghi_A11G16741.gene	Ghi_D01G00936.gene			Ghi_D03G06561.gene	Ghi_D08G05081.gene	Ghi_A04G06801.gene
Ghi_A12G05186.gene	Ghi_D05G01621.gene	Ghi_D11G00591.gene			Ghi_D10G04336.gene	Ghi_A04G00441.gene	Ghi_D11G13246.gene
Ghi_D07G11626.gene	Ghi_D11G18181.gene	Ghi_A03G12221.gene			Ghi_A05G23716.gene	Ghi_A12G01886.gene	Ghi_A04G07991.gene
Ghi_D07G10576.gene	Ghi_A09G05866.gene	Ghi_A10G04071.gene			Ghi_A04G07131.gene	Ghi_A09G05841.gene	Ghi_D06G09991.gene
Ghi_A01G09121.gene	Ghi_A07G10656.gene	Ghi_D07G05556.gene			Ghi_A04G03496.gene	Ghi_A03G10246.gene	Ghi_D01G06616.gene
Ghi_A13G14826.gene	Ghi_D13G10471.gene	Ghi_A11G17356.gene			Ghi_A08G03426.gene	Ghi_A13G00801.gene	Ghi_A07G05201.gene
Ghi_D07G11196.gene	Ghi_A06G02306.gene	Ghi_A05G17001.gene			Ghi_A12G15166.gene	Ghi_A07G08351.gene	Ghi_D07G10811.gene
Ghi_D03G08166.gene	Ghi_A05G02371.gene	Ghi_D13G07131.gene			Ghi_D10G09126.gene	Ghi_A06G07891.gene	Ghi_A11G17091.gene
Ghi_A05G05091.gene	Ghi_A13G05976.gene	Ghi_A11G16581.gene			Ghi_A12G15161.gene	Ghi_A08G04961.gene	Ghi_A01G12071.gene
Ghi_A07G01056.gene	Ghi_D12G09811.gene	Ghi_D01G09671.gene			Ghi_A08G02301.gene	Ghi_A09G10186.gene	Ghi_A09G13561.gene
Ghi_A07G01051.gene	Ghi_A11G00641.gene	Ghi_D06G09101.gene			Ghi_D11G02761.gene	Ghi_D10G05461.gene	Ghi_D11G02066.gene
Ghi_D12G13346.gene	Ghi_D05G11231.gene	Ghi_A05G08866.gene			Ghi_D05G01611.gene	Ghi_A05G00796.gene	Ghi_A11G00156.gene
Ghi_A07G04481.gene	Ghi_A05G03131.gene	Ghi_D12G15401.gene			Ghi_D05G06341.gene	Ghi_A05G07071.gene	Ghi_D05G14506.gene
Ghi_A08G11666.gene	Ghi_A12G14736.gene	Ghi_D01G08206.gene			Ghi_D08G06381.gene	Ghi_D02G12196.gene	Ghi_A10G02421.gene
Ghi_A08G11661.gene	Ghi_A12G14731.gene	Ghi_D05G03791.gene			Ghi_A05G12626.gene	Ghi_D04G07891.gene	Ghi_A05G20401.gene
Ghi_A12G12961.gene	Ghi_D04G01831.gene	Ghi_A13G06116.gene			Ghi_A09G08926.gene	Ghi_D06G08876.gene	Ghi_D11G09686.gene
Ghi_A05G13671.gene	Ghi_A01G03826.gene	Ghi_D02G09651.gene			Ghi_D02G10376.gene	Ghi_A10G02856.gene	Ghi_D11G09681.gene
Ghi_D06G00871.gene	Ghi_D13G04511.gene	Ghi_A12G15656.gene			Ghi_D08G03106.gene	Ghi_A09G13931.gene	Ghi_A12G06961.gene
Ghi_A02G02356.gene	Ghi_D03G07171.gene	Ghi_A05G03816.gene			Ghi_D13G02591.gene	Ghi_A09G04276.gene	Ghi_D06G12061.gene
Ghi_D04G09081.gene	Ghi_A03G12076.gene	Ghi_A05G17761.gene			Ghi_D13G02596.gene	Ghi_D10G10356.gene	Ghi_A12G02246.gene
GhiUnG01561.gene	Ghi_A11G17826.gene	Ghi_A01G01841.gene			Ghi_D08G03606.gene	Ghi_D05G12001.gene	Ghi_D11G08086.gene
Ghi_A11G17506.gene	Ghi_A05G05206.gene	Ghi_D11G12371.gene			Ghi_A10G02256.gene	Ghi_D05G03006.gene	Ghi_A07G12661.gene
Ghi_A07G10996.gene	Ghi_A05G05201.gene	Ghi_A02G03361.gene			Ghi_A08G04626.gene	Ghi_D06G04491.gene	Ghi_A02G09671.gene
Ghi_A13G08576.gene	Ghi_D07G05186.gene	Ghi_A11G10181.gene			Ghi_A10G01501.gene	Ghi_D07G01026.gene	Ghi_A12G15596.gene
Ghi_D12G08561.gene	Ghi_D01G02331.gene	Ghi_A01G01156.gene			Ghi_A11G00886.gene	Ghi_D02G09596.gene	Ghi_A08G10866.gene
Ghi_A06G08501.gene	Ghi_D07G10856.gene	Ghi_A10G12901.gene			Ghi_D01G02651.gene	Ghi_A10G01001.gene	Ghi_A07G00481.gene
Ghi_A05G20486.gene	Ghi_A06G06241.gene	Ghi_A12G03921.gene			Ghi_A05G20641.gene	Ghi_D07G10331.gene	Ghi_A09G10361.gene
Ghi_A12G13616.gene	Ghi_D05G11696.gene	Ghi_D01G10761.gene			Ghi_A08G05576.gene	Ghi_A11G02941.gene	Ghi_D05G06531.gene
Ghi_D09G01131.gene	Ghi_A13G02281.gene	Ghi_A06G09636.gene			Ghi_D12G07886.gene	Ghi_A12G11761.gene	Ghi_A05G13341.gene
Ghi_A05G10326.gene	Ghi_D03G06701.gene	Ghi_D07G02071.gene			Ghi_A10G08906.gene	Ghi_D08G14441.gene	Ghi_A07G01891.gene
Ghi_D06G11081.gene	Ghi_A13G02951.gene	Ghi_A11G16741.gene			Ghi_D06G05636.gene	Ghi_A01G08096.gene	Ghi_A08G12426.gene
Ghi_A06G09451.gene	Ghi_A03G11041.gene	Ghi_A09G05081.gene			Ghi_D06G05631.gene	Ghi_D12G10896.gene	Ghi_A03G12766.gene
Ghi_A05G20156.gene	Ghi_D11G15421.gene	Ghi_D09G02256.gene			Ghi_D04G06561.gene	Ghi_D06G03761.gene	Ghi_D10G10341.gene
GhiUnG01191.gene	Ghi_D11G00751.gene	Ghi_D08G07356.gene			Ghi_D11G17171.gene	Ghi_A04G05286.gene	Ghi_D03G09551.gene
Ghi_D08G10096.gene	Ghi_A10G14186.gene	Ghi_D02G08861.gene			Ghi_D04G02416.gene	Ghi_A03G02056.gene	Ghi_D13G10121.gene
Ghi_A03G03866.gene	Ghi_A05G14016.gene	Ghi_D02G10301.gene			Ghi_A04G03861.gene	Ghi_A02G09231.gene	Ghi_D11G01091.gene
Ghi_A06G10456.gene	Ghi_A08G00311.gene	Ghi_D08G05261.gene			Ghi_D01G03216.gene	Ghi_A01G02706.gene	Ghi_A06G08626.gene
Ghi_A04G02286.gene	Ghi_A12G10316.gene	Ghi_A09G05866.gene			Ghi_A05G17246.gene	Ghi_D08G03551.gene	Ghi_D07G02136.gene
Ghi_A09G09956.gene	Ghi_A08G10161.gene	Ghi_D05G08726.gene			Ghi_A02G04126.gene	Ghi_D12G12356.gene	Ghi_D02G12671.gene
Ghi_A12G09216.gene	Ghi_D12G07671.gene	Ghi_D04G06511.gene			Ghi_A11G04996.gene	Ghi_A07G04166.gene	Ghi_D06G07356.gene
Ghi_A03G01426.gene	Ghi_A03G01231.gene	Ghi_A03G10221.gene			Ghi_A13G04036.gene	Ghi_D06G00316.gene	Ghi_D01G12081.gene
Ghi_D02G07921.gene	Ghi_D10G10841.gene	Ghi_D13G07301.gene			Ghi_D13G10401.gene	Ghi_A10G01426.gene	Ghi_A03G06936.gene
Ghi_A01G04251.gene	Ghi_D10G02811.gene	Ghi_A08G12751.gene			Ghi_D04G00926.gene	Ghi_D09G07971.gene	Ghi_A01G04191.gene
Ghi_A07G13316.gene	Ghi_A11G11611.gene	Ghi_A13G00481.gene			Ghi_A11G18116.gene	Ghi_A07G13546.gene	Ghi_D03G05326.gene
Ghi_D01G09881.gene	Ghi_A06G10291.gene	Ghi_A13G05976.gene			Ghi_A11G15746.gene	Ghi_A08G12766.gene	Ghi_A06G07826.gene
Ghi_A10G03021.gene	Ghi_A04G02311.gene	Ghi_A11G00641.gene			Ghi_A11G18111.gene	Ghi_D12G05871.gene	GhiUnG02146.gene
Ghi_A10G03026.gene	Ghi_A06G10746.gene	Ghi_A12G00801.gene			Ghi_A10G14331.gene	Ghi_D03G09526.gene	Ghi_A10G06191.gene
Ghi_A03G02736.gene	Ghi_D06G04476.gene	Ghi_A09G09571.gene			Ghi_D09G01341.gene	Ghi_A09G12176.gene	Ghi_D11G06076.gene
Ghi_A01G03156.gene	Ghi_A08G11411.gene	Ghi_D05G11231.gene			Ghi_A06G03066.gene	Ghi_A13G02416.gene	Ghi_D07G10881.gene
Ghi_D03G06326.gene	Ghi_A05G09021.gene	Ghi_A07G11956.gene			Ghi_D12G15246.gene	Ghi_D02G00151.gene	Ghi_D01G11786.gene
Ghi_A01G02286.gene	Ghi_D01G09481.gene	Ghi_A08G06236.gene			Ghi_A04G01206.gene	Ghi_A12G11246.gene	Ghi_A01G02566.gene
Ghi_A13G14476.gene	Ghi_D12G11906.gene	Ghi_A12G14731.gene			Ghi_D02G04611.gene	Ghi_A05G00101.gene	Ghi_D06G00766.gene
Ghi_A01G04871.gene	Ghi_A07G05271.gene	Ghi_D04G01831.gene			Ghi_A02G00981.gene	Ghi_A05G06466.gene	Ghi_D01G08701.gene
Ghi_A10G13001.gene	Ghi_A09G06121.gene	Ghi_A07G12381.gene			Ghi_A03G07111.gene	Ghi_D02G01951.gene	Ghi_D01G04856.gene
Ghi_D08G07646.gene	Ghi_D05G00291.gene	Ghi_A12G13826.gene			Ghi_A09G09526.gene	Ghi_A02G05851.gene	Ghi_A04G04101.gene
Ghi_A11G12026.gene	Ghi_A13G04686.gene	Ghi_D02G10496.gene			Ghi_A03G06646.gene	Ghi_D11G04101.gene	Ghi_A07G01216.gene
Ghi_D01G07911.gene	Ghi_D04G00516.gene	Ghi_D02G11361.gene			Ghi_A08G03196.gene	Ghi_A02G09296.gene	Ghi_A07G00166.gene
Ghi_D05G03531.gene	Ghi_D13G11166.gene	Ghi_A07G10491.gene			Ghi_D09G08341.gene	Ghi_D10G01251.gene	Ghi_A09G08236.gene
Ghi_A09G08771.gene	Ghi_D05G05606.gene	Ghi_D07G12571.gene			Ghi_D02G02871.gene	Ghi_A05G13541.gene	Ghi_D03G04721.gene
Ghi_A07G09261.gene	Ghi_A02G06931.gene	Ghi_A12G11576.gene			Ghi_D05G11241.gene	Ghi_D06G03811.gene	Ghi_A09G14901.gene
Ghi_D08G00346.gene	Ghi_A13G08041.gene	Ghi_D10G01931.gene			Ghi_A07G11961.gene	Ghi_D08G02556.gene	Ghi_A09G00041.gene
Ghi_A05G18511.gene	Ghi_A07G08416.gene	Ghi_D05G05876.gene			Ghi_D02G03471.gene	Ghi_D07G11681.gene	Ghi_D05G02161.gene
Ghi_D11G05376.gene	Ghi_A06G09506.gene	Ghi_A12G06426.gene			Ghi_A10G09061.gene	Ghi_D06G07251.gene	Ghi_A06G09966.gene
Ghi_A08G07121.gene	Ghi_A12G03046.gene	Ghi_A11G17791.gene			Ghi_D12G08031.gene	Ghi_A05G11706.gene	Ghi_D13G03006.gene
Ghi_A12G12571.gene	Ghi_D02G06121.gene	Ghi_A04G07491.gene			Ghi_D12G08036.gene	Ghi_A03G12041.gene	Ghi_A02G07146.gene
Ghi_D05G05671.gene	Ghi_D02G12661.gene	Ghi_A10G09536.gene			Ghi_D05G03866.gene	Ghi_A03G01581.gene	Ghi_A10G04256.gene
Ghi_A11G09881.gene	Ghi_A08G06846.gene	Ghi_D10G09831.gene			Ghi_A06G08811.gene	Ghi_D08G12051.gene	Ghi_D03G08271.gene
Ghi_D01G01076.gene	Ghi_D05G10891.gene	Ghi_A13G13461.gene			Ghi_A01G11451.gene	Ghi_A09G13721.gene	Ghi_D13G12601.gene
Ghi_D08G00231.gene	Ghi_D04G03081.gene	Ghi_A11G12546.gene			Ghi_A13G01876.gene	Ghi_D07G00896.gene	Ghi_D04G00526.gene
Ghi_D11G18216.gene	Ghi_D05G07216.gene	Ghi_D03G06701.gene			Ghi_A05G13156.gene	Ghi_D06G01511.gene	Ghi_A13G13671.gene
Ghi_A05G08061.gene	Ghi_D11G04136.gene	Ghi_D04G03911.gene			Ghi_A05G16386.gene	Ghi_D11G05866.gene	Ghi_A02G00491.gene
Ghi_A08G08571.gene	Ghi_A04G05471.gene	Ghi_A03G11041.gene			Ghi_D09G11436.gene	Ghi_D04G06916.gene	Ghi_D02G09451.gene
Ghi_D06G06936.gene	Ghi_A01G05176.gene	Ghi_A11G04186.gene			Ghi_D07G11931.gene	Ghi_D09G05681.gene	Ghi_A13G00866.gene
Ghi_D09G11216.gene	Ghi_D06G10826.gene	Ghi_A09G06376.gene			Ghi_D02G04846.gene	Ghi_A07G07686.gene	Ghi_A08G12221.gene
Ghi_A08G07876.gene	Ghi_A03G10731.gene	Ghi_D11G06716.gene			Ghi_A07G09036.gene	Ghi_A04G01626.gene	Ghi_A11G09986.gene
Ghi_A06G02211.gene	Ghi_A08G13316.gene	Ghi_A10G03436.gene			Ghi_D12G01516.gene	Ghi_A04G01621.gene	Ghi_A11G09981.gene
Ghi_D11G07611.gene	Ghi_D06G10791.gene	Ghi_D05G06741.gene			Ghi_A13G11636.gene	Ghi_D11G01416.gene	Ghi_A05G11671.gene
Ghi_A03G12271.gene	Ghi_A04G06356.gene	Ghi_A05G08581.gene			Ghi_D03G01841.gene	Ghi_D03G01136.gene	Ghi_A12G12846.gene
Ghi_A02G09511.gene	Ghi_A09G01936.gene	Ghi_D11G00751.gene			Ghi_A05G03786.gene	Ghi_D03G06686.gene	Ghi_A02G02251.gene
Ghi_A12G09171.gene	Ghi_A02G05941.gene	Ghi_A10G09981.gene			Ghi_D03G07986.gene	Ghi_D02G01071.gene	Ghi_A05G19401.gene
Ghi_A03G07576.gene	Ghi_A11G05541.gene	Ghi_A11G07296.gene			Ghi_A08G12616.gene	Ghi_D11G04936.gene	Ghi_A11G17021.gene
Ghi_D08G10226.gene	Ghi_D01G01446.gene	Ghi_A13G11961.gene			Ghi_A07G02616.gene	Ghi_A11G18836.gene	Ghi_A12G07371.gene
Ghi_A01G10531.gene	Ghi_A12G10181.gene	Ghi_D05G09371.gene			Ghi_D05G14576.gene	Ghi_D13G12571.gene	Ghi_A01G11686.gene
Ghi_D01G05406.gene	GhiUnG03366.gene	Ghi_A07G06766.gene			Ghi_D01G03106.gene	Ghi_D02G03576.gene	Ghi_A12G10996.gene
Ghi_D07G01446.gene	Ghi_A12G15466.gene	Ghi_A06G12666.gene			Ghi_D02G04901.gene	GhiUnG01486.gene	Ghi_A05G04151.gene
Ghi_D10G07056.gene	Ghi_D10G12906.gene	Ghi_D02G09121.gene			Ghi_A01G06081.gene	Ghi_D04G09491.gene	Ghi_A05G10206.gene
Ghi_A01G05396.gene	Ghi_A09G14326.gene	Ghi_A03G04811.gene			Ghi_A13G08206.gene	Ghi_A11G17351.gene	Ghi_D10G03571.gene
Ghi_A06G11441.gene	Ghi_D02G10311.gene	Ghi_A12G00306.gene			Ghi_A07G14121.gene	Ghi_D07G01926.gene	Ghi_A06G10551.gene
Ghi_A01G05391.gene	Ghi_A09G11781.gene	Ghi_D03G03701.gene			Ghi_A05G10711.gene	Ghi_A10G10641.gene	Ghi_D09G04731.gene
Ghi_A04G05616.gene	Ghi_D06G12326.gene	Ghi_A09G06786.gene			Ghi_A01G01681.gene	Ghi_D11G03461.gene	Ghi_A11G07806.gene
Ghi_D11G17306.gene	Ghi_D12G03956.gene	Ghi_D09G04536.gene			Ghi_A01G01686.gene	Ghi_D02G00911.gene	Ghi_D08G14476.gene
Ghi_D11G17301.gene	Ghi_D09G04001.gene	Ghi_A03G01941.gene			Ghi_A10G13126.gene	Ghi_A05G01271.gene	Ghi_A09G03616.gene
Ghi_D06G02106.gene	Ghi_D09G04006.gene	Ghi_D12G07671.gene			Ghi_A13G14241.gene	Ghi_A05G01276.gene	Ghi_D09G02776.gene
Ghi_A13G11966.gene	Ghi_A05G11411.gene	Ghi_A09G14281.gene			Ghi_A05G05256.gene	Ghi_A12G10136.gene	Ghi_A01G04351.gene
Ghi_D01G12001.gene	Ghi_A02G08556.gene	Ghi_D10G12086.gene			Ghi_D04G10011.gene	Ghi_A06G09081.gene	Ghi_D12G03106.gene
Ghi_A12G14206.gene	Ghi_D12G10096.gene	Ghi_A12G15091.gene			Ghi_A02G08746.gene	Ghi_D02G12776.gene	Ghi_A03G02576.gene
Ghi_D01G03676.gene	Ghi_A05G21341.gene	Ghi_A05G12241.gene			Ghi_A03G03086.gene	Ghi_D12G10411.gene	Ghi_A08G01601.gene
Ghi_D01G06271.gene	Ghi_D06G03396.gene	Ghi_D12G08211.gene			Ghi_A05G11441.gene	Ghi_A13G13771.gene	Ghi_A10G01906.gene
Ghi_D13G01441.gene	Ghi_A11G01021.gene	Ghi_A05G21211.gene			Ghi_D09G05341.gene	Ghi_D13G01311.gene	Ghi_A03G09591.gene
Ghi_A01G05641.gene	Ghi_D05G03181.gene	Ghi_A09G01786.gene			Ghi_A08G09266.gene	Ghi_A05G04016.gene	Ghi_A08G13631.gene
Ghi_D12G04321.gene	Ghi_A10G05076.gene	Ghi_A01G02926.gene			Ghi_A11G17876.gene	Ghi_A12G06256.gene	Ghi_D03G07656.gene
Ghi_A08G05431.gene	Ghi_A09G00951.gene	Ghi_D10G02811.gene			Ghi_D02G00566.gene	Ghi_A13G14691.gene	Ghi_A11G17611.gene
Ghi_A09G01176.gene	Ghi_A04G01056.gene	Ghi_D10G00946.gene			Ghi_A05G13961.gene	Ghi_D01G10866.gene	Ghi_D11G06271.gene
Ghi_A11G02381.gene	Ghi_D13G04751.gene	Ghi_A01G10271.gene			Ghi_A10G09106.gene	Ghi_A12G12681.gene	Ghi_A07G13761.gene
Ghi_A11G02386.gene	Ghi_A05G12536.gene	Ghi_D11G03861.gene			Ghi_A06G00596.gene	Ghi_D03G08746.gene	Ghi_A02G01506.gene
Ghi_D06G01456.gene	Ghi_A02G10041.gene	Ghi_D07G04426.gene			Ghi_D12G09151.gene	Ghi_A13G14016.gene	Ghi_A01G07191.gene
Ghi_D11G10821.gene	Ghi_D12G13391.gene	Ghi_A08G00056.gene			Ghi_A09G09641.gene	Ghi_A05G08811.gene	Ghi_D03G06306.gene
Ghi_D11G10826.gene	GhiUnG01821.gene	Ghi_D09G04271.gene			Ghi_A01G03466.gene	Ghi_D02G08601.gene	Ghi_A07G13766.gene
Ghi_A10G11486.gene	Ghi_D07G07151.gene	Ghi_A04G02316.gene			Ghi_A01G03461.gene	Ghi_A12G03311.gene	Ghi_A03G05796.gene
Ghi_A01G12361.gene	Ghi_A13G01211.gene	Ghi_A11G02686.gene			Ghi_D05G03936.gene	Ghi_D03G08086.gene	Ghi_A07G11116.gene
Ghi_A05G02836.gene	Ghi_D04G06756.gene	Ghi_D06G04476.gene			Ghi_D05G11721.gene	Ghi_D07G10346.gene	Ghi_A01G06246.gene
Ghi_A01G12016.gene	Ghi_A10G14156.gene	Ghi_A08G13261.gene			Ghi_A07G02736.gene	Ghi_D05G03901.gene	Ghi_A01G06241.gene
Ghi_D12G05581.gene	Ghi_D12G15576.gene	Ghi_D13G02351.gene			Ghi_A11G16451.gene	Ghi_D08G14436.gene	Ghi_D06G04281.gene
Ghi_A11G02891.gene	Ghi_A02G02986.gene	Ghi_D12G13881.gene			Ghi_A02G07706.gene	Ghi_D01G04611.gene	Ghi_D08G01821.gene
Ghi_A02G07391.gene	Ghi_D03G08556.gene	Ghi_A11G03551.gene			Ghi_D06G01371.gene	Ghi_D08G06076.gene	Ghi_D06G04286.gene
Ghi_A10G00851.gene	Ghi_D09G10556.gene	Ghi_D01G00501.gene			Ghi_A11G12511.gene	Ghi_D05G04276.gene	Ghi_A11G16646.gene
Ghi_D12G12181.gene	Ghi_D09G08211.gene	Ghi_A13G14501.gene			Ghi_D05G01786.gene	Ghi_D10G03256.gene	Ghi_D01G05386.gene
Ghi_A07G08396.gene	Ghi_A11G08731.gene	Ghi_D12G12686.gene			Ghi_D06G12581.gene	Ghi_A06G03026.gene	Ghi_D11G01551.gene
Ghi_D12G12186.gene	Ghi_D01G08781.gene	Ghi_A07G05271.gene			Ghi_A10G02866.gene	Ghi_A10G11411.gene	Ghi_A10G09416.gene
Ghi_A01G12581.gene	Ghi_A07G09291.gene	Ghi_A08G00621.gene			Ghi_A08G06721.gene	Ghi_A12G04721.gene	Ghi_D03G08741.gene
Ghi_A01G09206.gene	Ghi_A11G11346.gene	Ghi_D13G12671.gene			Ghi_A10G08651.gene	Ghi_D11G02561.gene	Ghi_A08G09941.gene
Ghi_A01G09201.gene	Ghi_D02G04006.gene	Ghi_A12G13226.gene			Ghi_D10G09686.gene	Ghi_D04G09051.gene	Ghi_A09G03836.gene
Ghi_D01G01331.gene	Ghi_A05G10641.gene	Ghi_A13G13626.gene			Ghi_D08G14626.gene	Ghi_A08G07581.gene	Ghi_D01G12121.gene
Ghi_A11G14331.gene	Ghi_D05G13911.gene	Ghi_D07G02806.gene			Ghi_D03G06731.gene	Ghi_D13G02646.gene	Ghi_A07G11136.gene
Ghi_A10G05511.gene	Ghi_D03G09506.gene	Ghi_A13G13996.gene			Ghi_D12G03591.gene	Ghi_D06G09481.gene	Ghi_A06G10056.gene
Ghi_A07G07926.gene	Ghi_D06G08226.gene	Ghi_A07G08416.gene			Ghi_A11G15186.gene	Ghi_A03G06581.gene	Ghi_D13G10951.gene
Ghi_A10G04386.gene	Ghi_D04G01556.gene	Ghi_A05G13766.gene			Ghi_A09G00271.gene	Ghi_A12G13951.gene	Ghi_D12G14571.gene
Ghi_D11G02941.gene	Ghi_D08G01371.gene	Ghi_A09G13051.gene			Ghi_D09G08296.gene	Ghi_D10G02156.gene	Ghi_D13G01981.gene
Ghi_A01G10981.gene	Ghi_A06G06691.gene	Ghi_D07G05716.gene			Ghi_D05G00771.gene	Ghi_D02G10851.gene	Ghi_D01G03161.gene
Ghi_A09G02881.gene	Ghi_A06G01316.gene	Ghi_A03G08856.gene			Ghi_D11G04881.gene	Ghi_A13G03951.gene	Ghi_A11G16161.gene
Ghi_D01G09121.gene	Ghi_A03G10341.gene	Ghi_A06G09506.gene			Ghi_D05G01426.gene	Ghi_D12G12996.gene	Ghi_A11G04916.gene
Ghi_A12G02081.gene	Ghi_A01G02516.gene	Ghi_A10G14586.gene			Ghi_D08G07221.gene	Ghi_A02G03836.gene	Ghi_D13G10481.gene
Ghi_A01G04891.gene	Ghi_A09G14196.gene	Ghi_A11G15726.gene			Ghi_D05G02681.gene	Ghi_D09G05426.gene	Ghi_A01G03001.gene
Ghi_D13G03321.gene	Ghi_A10G04171.gene	Ghi_A12G15116.gene			Ghi_D01G01581.gene	Ghi_D01G04346.gene	Ghi_D01G03291.gene
Ghi_A12G03686.gene	Ghi_A12G03351.gene	Ghi_A09G04756.gene			Ghi_D01G01586.gene	Ghi_D02G11201.gene	Ghi_A13G14291.gene
Ghi_D06G10161.gene	Ghi_D09G08786.gene	Ghi_D02G12661.gene			Ghi_A06G03661.gene	Ghi_D08G04221.gene	Ghi_D06G00516.gene
Ghi_D02G08656.gene	Ghi_D02G04426.gene	Ghi_D05G10891.gene			Ghi_A09G11076.gene	Ghi_A01G04611.gene	Ghi_A09G01961.gene
Ghi_A04G04201.gene	Ghi_A07G10846.gene	Ghi_D11G10621.gene			Ghi_A03G10921.gene	Ghi_A12G03216.gene	Ghi_D13G02366.gene
Ghi_D13G05236.gene	Ghi_A03G05906.gene	Ghi_A03G04761.gene			Ghi_A03G10926.gene	Ghi_D13G10671.gene	Ghi_A05G00891.gene
Ghi_A11G07636.gene	Ghi_D05G06396.gene	Ghi_D05G06696.gene			Ghi_D10G00486.gene	Ghi_D07G01991.gene	Ghi_D12G15716.gene
Ghi_D05G08221.gene	Ghi_D11G04796.gene	Ghi_D08G02501.gene			Ghi_A08G07541.gene	Ghi_D11G10371.gene	Ghi_D12G15711.gene
Ghi_D05G08226.gene	Ghi_D11G09236.gene	Ghi_A01G05176.gene			Ghi_D04G09011.gene	Ghi_A10G11551.gene	Ghi_D09G07206.gene
Ghi_A11G07631.gene	Ghi_D12G03111.gene	Ghi_D05G04886.gene			Ghi_A11G00456.gene	Ghi_D11G16431.gene	Ghi_A09G14891.gene
Ghi_D13G12531.gene	Ghi_D01G04686.gene	Ghi_D04G01066.gene			Ghi_A05G00786.gene	Ghi_A04G05786.gene	Ghi_D08G13356.gene
Ghi_D13G12536.gene	Ghi_D11G11171.gene	Ghi_D01G03086.gene			Ghi_D11G10426.gene	Ghi_A10G14261.gene	Ghi_A09G06726.gene
Ghi_D06G11411.gene	Ghi_D12G10836.gene	Ghi_A09G01936.gene			Ghi_A10G10166.gene	Ghi_A06G12271.gene	Ghi_D11G17376.gene
Ghi_D06G11416.gene	Ghi_D05G02386.gene	Ghi_D09G06891.gene			Ghi_A08G09396.gene	Ghi_D07G08471.gene	Ghi_A04G05296.gene
Ghi_A12G05686.gene	Ghi_A06G08151.gene	Ghi_D01G01446.gene			Ghi_A05G07066.gene	Ghi_D10G10486.gene	Ghi_D03G00826.gene
Ghi_D12G09556.gene	Ghi_A11G02251.gene	Ghi_A07G07836.gene			Ghi_A10G01711.gene	Ghi_A01G05981.gene	Ghi_A05G06826.gene
Ghi_A02G07631.gene	Ghi_D10G10176.gene	Ghi_A09G03576.gene			Ghi_D11G00766.gene	Ghi_D11G06371.gene	Ghi_D13G04036.gene
Ghi_A02G07636.gene	GhiUnG01961.gene	Ghi_D11G15111.gene			Ghi_D12G10981.gene	Ghi_D11G02876.gene	Ghi_A04G05741.gene
Ghi_A10G06721.gene	Ghi_A01G03071.gene	Ghi_D11G15116.gene			Ghi_D05G07486.gene	Ghi_D08G05781.gene	Ghi_A05G16306.gene
Ghi_A08G13171.gene	Ghi_D11G13841.gene	Ghi_A05G00536.gene			Ghi_D03G07116.gene	Ghi_D01G11246.gene	Ghi_A10G11451.gene
Ghi_A02G02576.gene	Ghi_A06G11221.gene	Ghi_D12G04916.gene			Ghi_D04G07556.gene	Ghi_D02G11506.gene	Ghi_A13G12191.gene
Ghi_D12G04041.gene	Ghi_A11G04346.gene	Ghi_D04G08081.gene			Ghi_D04G03641.gene	Ghi_D06G00691.gene	Ghi_A07G02691.gene
Ghi_A03G00571.gene	Ghi_A05G12921.gene	Ghi_D09G09041.gene			Ghi_D01G03816.gene	Ghi_A05G07091.gene	Ghi_A01G12561.gene
Ghi_D09G11576.gene	Ghi_D12G08436.gene	Ghi_A03G07481.gene			Ghi_A09G06681.gene	Ghi_D10G02316.gene	Ghi_A13G13821.gene
Ghi_A08G14236.gene	Ghi_A07G09641.gene	Ghi_D13G04591.gene			Ghi_D11G17811.gene	Ghi_D01G02241.gene	Ghi_A07G14216.gene
Ghi_D12G01496.gene	Ghi_A07G01866.gene	Ghi_A12G15466.gene			Ghi_A09G07121.gene	Ghi_D04G10866.gene	Ghi_A05G16856.gene
Ghi_A08G14231.gene	Ghi_D09G06756.gene	Ghi_D04G00701.gene			Ghi_A02G05331.gene	Ghi_A07G03866.gene	Ghi_A05G03706.gene
Ghi_A09G12426.gene	Ghi_A10G12576.gene	Ghi_A01G06051.gene			Ghi_A07G02051.gene	Ghi_A01G10256.gene	Ghi_A03G01546.gene
Ghi_A12G15686.gene	Ghi_A07G08511.gene	Ghi_D05G11606.gene			Ghi_A05G14271.gene	Ghi_D04G10296.gene	Ghi_D01G10696.gene
Ghi_D05G09176.gene	Ghi_A08G11891.gene	Ghi_D03G06841.gene			Ghi_A07G14021.gene	Ghi_D01G00011.gene	Ghi_D04G01811.gene
Ghi_A13G09941.gene	Ghi_A08G11896.gene	Ghi_A03G08261.gene			Ghi_A03G00726.gene	Ghi_A09G11976.gene	Ghi_A09G10636.gene
Ghi_D02G05541.gene	Ghi_D09G08621.gene	Ghi_D09G04001.gene			Ghi_D05G12446.gene	Ghi_D11G09121.gene	Ghi_A03G13301.gene
Ghi_A13G13941.gene	Ghi_A01G01501.gene	Ghi_D09G04006.gene			Ghi_A06G02586.gene	Ghi_D03G01586.gene	Ghi_A07G00871.gene
Ghi_A11G11201.gene	Ghi_A10G03726.gene	Ghi_D13G01446.gene			Ghi_A09G15461.gene	Ghi_D02G01081.gene	Ghi_D01G02411.gene
Ghi_D02G04141.gene	Ghi_D03G09281.gene	Ghi_A06G00656.gene			Ghi_A13G04011.gene	Ghi_A02G01011.gene	Ghi_A03G08926.gene
Ghi_A02G07531.gene	Ghi_A08G00401.gene	Ghi_D01G02446.gene			Ghi_A05G05011.gene	Ghi_A07G03321.gene	Ghi_A06G03416.gene
Ghi_D06G09896.gene	Ghi_A03G03961.gene	Ghi_D13G00311.gene			Ghi_D12G02741.gene	Ghi_D12G09231.gene	Ghi_D10G08771.gene
Ghi_D06G09891.gene	Ghi_D09G11621.gene	Ghi_A03G02076.gene			Ghi_A07G00361.gene	Ghi_A07G11716.gene	Ghi_A06G03411.gene
Ghi_A12G12376.gene	Ghi_A01G04026.gene	Ghi_A07G12101.gene			Ghi_A10G05821.gene	Ghi_A12G15691.gene	Ghi_A05G20021.gene
Ghi_A10G12021.gene	Ghi_A07G12186.gene	Ghi_D06G03396.gene			Ghi_A01G12076.gene	Ghi_A07G02141.gene	Ghi_A02G00891.gene
Ghi_A12G12371.gene	Ghi_A07G13271.gene	Ghi_A08G06776.gene			Ghi_D10G11866.gene	Ghi_A03G03751.gene	Ghi_D05G00446.gene
Ghi_A05G03826.gene	Ghi_D10G12396.gene	Ghi_D08G04251.gene			Ghi_A07G10916.gene	Ghi_A10G13701.gene	Ghi_A05G16181.gene
Ghi_A10G13376.gene	Ghi_A08G13056.gene	Ghi_D04G02446.gene			Ghi_D11G02021.gene	Ghi_A12G13096.gene	Ghi_A10G03151.gene
Ghi_A05G22381.gene	Ghi_A11G10276.gene	Ghi_D06G01806.gene			Ghi_A11G08136.gene	Ghi_A05G09596.gene	Ghi_D04G10611.gene
Ghi_A05G14691.gene	Ghi_D01G01971.gene	Ghi_D09G01671.gene			Ghi_D10G13701.gene	Ghi_D04G03771.gene	Ghi_D08G00181.gene
Ghi_A12G15681.gene	Ghi_A06G11231.gene	Ghi_D12G07951.gene			Ghi_D12G09651.gene	Ghi_A10G11921.gene	Ghi_D02G10236.gene
Ghi_A05G14696.gene	Ghi_A07G11821.gene	Ghi_D13G04751.gene			Ghi_A12G03196.gene	Ghi_A08G10646.gene	Ghi_D05G10926.gene
Ghi_A13G01536.gene	Ghi_D11G06826.gene	Ghi_A10G03821.gene			Ghi_A07G08956.gene	Ghi_A08G09981.gene	Ghi_A09G02456.gene
Ghi_D10G11501.gene	Ghi_D11G06821.gene	Ghi_A02G10041.gene			Ghi_D11G09351.gene	Ghi_D09G00351.gene	Ghi_A03G13656.gene
Ghi_A10G12586.gene	Ghi_D06G04676.gene	Ghi_A02G10046.gene			Ghi_D11G02026.gene	Ghi_D01G01981.gene	Ghi_D11G04516.gene
Ghi_D03G08731.gene	Ghi_D07G10056.gene	GhiUnG01821.gene			Ghi_A03G08286.gene	Ghi_A11G05431.gene	Ghi_A01G05456.gene
Ghi_A05G11366.gene	Ghi_D04G01306.gene	Ghi_D06G11056.gene			Ghi_A06G09236.gene	Ghi_D09G09336.gene	Ghi_D07G09941.gene
Ghi_A05G13736.gene	Ghi_D04G01301.gene	Ghi_D04G06756.gene			Ghi_D11G04981.gene	Ghi_A09G09966.gene	Ghi_A05G01896.gene
Ghi_A10G10886.gene	Ghi_D03G00126.gene	Ghi_D13G13581.gene			Ghi_A03G01936.gene	Ghi_A10G03011.gene	Ghi_A13G01981.gene
Ghi_D03G04636.gene	Ghi_A03G10586.gene	Ghi_D09G10556.gene			Ghi_A12G06966.gene	Ghi_A02G09601.gene	Ghi_A01G10621.gene
Ghi_A07G10681.gene	Ghi_A04G07566.gene	Ghi_A05G04606.gene			Ghi_D09G10611.gene	Ghi_D07G10621.gene	Ghi_D05G04176.gene
Ghi_A06G08201.gene	Ghi_A10G12971.gene	Ghi_A05G04601.gene			Ghi_A12G02241.gene	Ghi_A09G05326.gene	Ghi_D05G08656.gene
Ghi_A06G09556.gene	Ghi_A09G00191.gene	Ghi_A11G16086.gene			Ghi_A03G09566.gene	Ghi_A12G02096.gene	Ghi_A01G09276.gene
Ghi_A12G10446.gene	Ghi_A13G07936.gene	Ghi_A09G13656.gene			Ghi_A07G13391.gene	Ghi_A08G13146.gene	Ghi_D06G07046.gene
Ghi_A12G10441.gene	Ghi_A10G00286.gene	Ghi_A05G12396.gene			Ghi_D01G09771.gene	Ghi_D08G08346.gene	Ghi_A09G01376.gene
Ghi_A05G21121.gene	Ghi_A07G13071.gene	Ghi_D03G01996.gene			Ghi_A08G10861.gene	Ghi_D07G04006.gene	Ghi_D03G05096.gene
Ghi_A07G12946.gene	Ghi_A09G07086.gene	Ghi_D01G01051.gene			Ghi_A12G12646.gene	Ghi_A12G13126.gene	Ghi_D13G01536.gene
Ghi_A05G13881.gene	Ghi_A05G21916.gene	Ghi_D09G00466.gene			Ghi_A03G01206.gene	Ghi_A02G07736.gene	Ghi_A04G06261.gene
Ghi_A06G00781.gene	Ghi_D02G11081.gene	Ghi_A11G11346.gene			Ghi_A09G10366.gene	Ghi_A02G03191.gene	Ghi_D02G09196.gene
Ghi_D10G02221.gene	Ghi_D03G09061.gene	Ghi_A10G02281.gene			Ghi_D04G08206.gene	Ghi_A10G03606.gene	Ghi_A08G02961.gene
Ghi_D10G02226.gene	Ghi_D03G03406.gene	Ghi_A05G05566.gene			Ghi_A12G08526.gene	Ghi_A12G15156.gene	Ghi_A11G02481.gene
Ghi_D09G05206.gene	Ghi_D03G03401.gene	Ghi_A06G01821.gene			Ghi_D09G03166.gene	Ghi_D03G09631.gene	Ghi_D02G06716.gene
Ghi_A05G10281.gene	Ghi_D10G02326.gene	Ghi_D12G13786.gene			Ghi_A05G13346.gene	Ghi_A04G01201.gene	Ghi_A02G04921.gene
Ghi_D08G09291.gene	Ghi_A13G08891.gene	Ghi_A13G13371.gene			Ghi_D05G06536.gene	Ghi_D11G07116.gene	Ghi_D09G09651.gene
Ghi_D02G06176.gene	Ghi_A01G02591.gene	Ghi_A01G11146.gene			Ghi_D05G14081.gene	Ghi_D05G05181.gene	Ghi_A09G00131.gene
Ghi_D06G03536.gene	Ghi_D11G06666.gene	Ghi_D10G00256.gene			Ghi_A13G02496.gene	Ghi_A05G04476.gene	Ghi_D11G05816.gene
Ghi_D05G01706.gene	Ghi_D11G06661.gene	Ghi_A11G10956.gene			Ghi_A03G08601.gene	Ghi_D09G08356.gene	Ghi_D11G05811.gene
Ghi_A10G09311.gene	Ghi_A03G09776.gene	Ghi_A05G01651.gene			Ghi_A08G12421.gene	Ghi_A13G03026.gene	Ghi_D12G09961.gene
Ghi_A06G07331.gene	Ghi_A11G06996.gene	Ghi_A03G10831.gene			Ghi_A03G12761.gene	Ghi_A13G06051.gene	Ghi_A07G01671.gene
Ghi_D03G06561.gene	Ghi_A09G05916.gene	Ghi_A09G04336.gene			Ghi_D07G01376.gene	Ghi_D03G00896.gene	Ghi_A05G16976.gene
Ghi_D05G14776.gene	Ghi_A05G23106.gene	Ghi_A13G04846.gene			Ghi_D07G09146.gene	Ghi_A11G07416.gene	Ghi_A03G02221.gene
Ghi_D05G11686.gene	Ghi_D12G04341.gene	Ghi_A09G14196.gene			Ghi_A04G06846.gene	Ghi_A10G14461.gene	Ghi_A05G04581.gene
Ghi_D10G04336.gene	Ghi_A11G03326.gene	Ghi_D08G08966.gene			Ghi_D06G03926.gene	Ghi_A04G03501.gene	Ghi_A02G00716.gene
Ghi_D02G11961.gene	Ghi_D07G10316.gene	Ghi_D11G13311.gene			Ghi_D07G05876.gene	Ghi_D12G02481.gene	Ghi_A07G07631.gene
Ghi_A04G07131.gene	Ghi_D02G08316.gene	Ghi_D12G04611.gene			Ghi_D11G11716.gene	Ghi_A05G01796.gene	Ghi_A06G01156.gene
Ghi_A04G03496.gene	Ghi_A05G15366.gene	Ghi_D09G08786.gene			Ghi_A12G07601.gene	Ghi_A09G04186.gene	Ghi_D11G16881.gene
Ghi_A10G03616.gene	Ghi_A13G13071.gene	Ghi_D11G12956.gene			Ghi_A13G04026.gene	Ghi_D07G04031.gene	Ghi_A05G07586.gene
Ghi_D06G08741.gene	Ghi_A12G11161.gene	Ghi_A13G12531.gene			Ghi_D05G12011.gene	Ghi_D11G17821.gene	Ghi_A10G07926.gene
Ghi_A08G03426.gene	Ghi_D06G11476.gene	Ghi_A07G10846.gene			Ghi_A11G10391.gene	Ghi_A13G12476.gene	Ghi_A05G06676.gene
Ghi_A11G11941.gene	Ghi_A11G09236.gene	Ghi_D02G02356.gene			Ghi_A05G19646.gene	Ghi_A02G10001.gene	Ghi_D09G08886.gene
Ghi_A02G00736.gene	Ghi_A05G11891.gene	Ghi_A03G05906.gene			Ghi_A10G13711.gene	Ghi_A11G01521.gene	Ghi_D03G01346.gene
Ghi_D02G02016.gene	Ghi_D12G01436.gene	Ghi_A07G12206.gene			Ghi_A03G13496.gene	Ghi_D05G13371.gene	Ghi_A05G03001.gene
Ghi_A12G15166.gene	Ghi_D05G14266.gene	Ghi_D11G15046.gene			Ghi_A06G01891.gene	Ghi_A04G00941.gene	Ghi_A11G09051.gene
Ghi_D10G09126.gene	Ghi_D11G13961.gene	Ghi_D07G02926.gene			Ghi_A11G02306.gene	Ghi_A01G02966.gene	Ghi_D05G08351.gene
Ghi_A12G15161.gene	Ghi_D09G06261.gene	Ghi_D03G06351.gene			Ghi_D01G02136.gene	Ghi_A04G05801.gene	Ghi_D13G12226.gene
Ghi_D05G13796.gene	Ghi_A05G05446.gene	Ghi_D02G01281.gene			Ghi_A01G08536.gene	Ghi_D08G03431.gene	Ghi_D13G12221.gene
Ghi_A08G02301.gene	Ghi_A02G01851.gene	Ghi_A03G08751.gene			Ghi_A03G10266.gene	Ghi_D09G06181.gene	Ghi_D02G04966.gene
Ghi_D11G02761.gene	Ghi_D03G00146.gene	Ghi_A08G00976.gene			Ghi_D06G06401.gene	Ghi_D03G08786.gene	Ghi_A08G06526.gene
Ghi_A01G08931.gene	Ghi_A06G00091.gene	Ghi_D05G02386.gene			Ghi_A10G09481.gene	Ghi_A03G10036.gene	Ghi_A05G14606.gene
Ghi_A13G00126.gene	Ghi_D07G05031.gene	Ghi_A03G13231.gene			Ghi_D12G13506.gene	Ghi_D04G09271.gene	Ghi_A05G02351.gene
Ghi_D05G01616.gene	Ghi_A06G01051.gene	Ghi_D05G02891.gene			Ghi_D05G02926.gene	Ghi_A11G03831.gene	Ghi_A03G00486.gene
Ghi_D08G06381.gene	Ghi_D10G05366.gene	Ghi_A05G04346.gene			Ghi_A10G09731.gene	Ghi_A01G06251.gene	Ghi_A12G00486.gene
Ghi_D02G10376.gene	Ghi_A06G11956.gene	Ghi_D11G15191.gene			Ghi_D07G03266.gene	Ghi_D02G09431.gene	Ghi_A12G08306.gene
Ghi_D08G03106.gene	Ghi_A04G04066.gene	Ghi_A11G18441.gene			Ghi_A05G24136.gene	Ghi_A12G00196.gene	Ghi_A03G00151.gene
Ghi_A03G04736.gene	Ghi_D05G01676.gene	Ghi_A12G02151.gene			Ghi_D05G00636.gene	Ghi_D11G08621.gene	Ghi_D10G10891.gene
Ghi_D13G02591.gene	Ghi_A11G12296.gene	GhiUnG02016.gene			Ghi_A09G08181.gene	Ghi_A05G20961.gene	Ghi_D09G06371.gene
Ghi_A05G09501.gene	Ghi_A11G11926.gene	Ghi_A02G05471.gene			Ghi_A09G08186.gene	Ghi_A03G03071.gene	Ghi_A11G11371.gene
Ghi_D13G02596.gene	Ghi_D10G07711.gene	Ghi_D04G06766.gene			Ghi_D02G03106.gene	Ghi_A10G12151.gene	Ghi_A01G06616.gene
Ghi_D08G03606.gene	Ghi_A09G12791.gene	Ghi_A07G01866.gene			Ghi_D05G01321.gene	Ghi_A05G23606.gene	Ghi_A07G14001.gene
Ghi_A10G02251.gene	Ghi_D07G12496.gene	Ghi_A02G09241.gene			Ghi_D06G00491.gene	Ghi_D12G03541.gene	Ghi_A05G19971.gene
Ghi_A10G02256.gene	Ghi_A11G07106.gene	Ghi_D04G03256.gene			Ghi_D06G00496.gene	Ghi_A11G11141.gene	Ghi_A07G05721.gene
Ghi_D05G14731.gene	Ghi_A12G05391.gene	Ghi_A10G11201.gene			Ghi_D12G12671.gene	Ghi_A06G00311.gene	Ghi_A04G01776.gene
Ghi_A10G01506.gene	Ghi_A13G09396.gene	Ghi_A07G14241.gene			Ghi_D09G07286.gene	Ghi_D04G02501.gene	Ghi_A05G19396.gene
Ghi_A08G04626.gene	Ghi_A03G10211.gene	Ghi_A10G12576.gene			Ghi_A01G12506.gene	Ghi_D08G04151.gene	Ghi_A07G10786.gene
Ghi_A10G01501.gene	Ghi_A07G12691.gene	Ghi_A08G11896.gene			Ghi_A09G00406.gene	Ghi_A13G06396.gene	Ghi_D01G02201.gene
Ghi_A11G00886.gene	Ghi_A12G00856.gene	Ghi_A11G08321.gene			Ghi_A09G00401.gene	Ghi_A12G02221.gene	Ghi_D02G08191.gene
Ghi_A11G02246.gene	Ghi_A08G15221.gene	Ghi_A01G01501.gene			Ghi_D13G08871.gene	Ghi_D13G13371.gene	Ghi_A09G10916.gene
Ghi_A05G21821.gene	Ghi_A13G01106.gene	Ghi_D10G12431.gene			Ghi_A13G01011.gene	Ghi_A11G13796.gene	Ghi_A02G09971.gene
Ghi_D11G15201.gene	Ghi_A06G09041.gene	Ghi_A13G01186.gene			Ghi_A01G10901.gene	Ghi_A01G08811.gene	Ghi_D10G08051.gene
Ghi_D11G15206.gene	Ghi_A08G11106.gene	Ghi_A05G20071.gene			Ghi_A01G10906.gene	Ghi_A09G08861.gene	Ghi_A13G14426.gene
Ghi_D01G02651.gene	Ghi_A12G11821.gene	Ghi_A03G03966.gene			Ghi_A05G04216.gene	Ghi_D13G06581.gene	Ghi_A03G02141.gene
Ghi_A05G20641.gene	Ghi_A13G01286.gene	Ghi_A10G06661.gene			Ghi_A10G04646.gene	Ghi_D06G01741.gene	Ghi_D05G01546.gene
Ghi_A05G06506.gene	Ghi_D10G12316.gene	Ghi_D11G02846.gene			Ghi_D04G05431.gene	Ghi_A13G02146.gene	Ghi_D06G03226.gene
Ghi_A08G05576.gene	Ghi_D05G11191.gene	Ghi_A07G13271.gene			Ghi_D12G07026.gene	Ghi_A12G03626.gene	Ghi_A01G03691.gene
Ghi_D11G07406.gene	Ghi_D11G08471.gene	Ghi_A06G05106.gene			Ghi_A05G01596.gene	Ghi_D05G05011.gene	Ghi_A02G09026.gene
Ghi_D12G07886.gene	Ghi_A01G11446.gene	Ghi_A09G08651.gene			Ghi_D11G01311.gene	Ghi_D10G05061.gene	Ghi_A02G09021.gene
Ghi_A13G07076.gene	Ghi_A03G01346.gene	Ghi_A06G03856.gene			Ghi_A01G04466.gene	Ghi_D03G06936.gene	Ghi_A10G04616.gene
Ghi_A11G01821.gene	Ghi_A01G07661.gene	Ghi_D05G06211.gene			Ghi_A05G18981.gene	Ghi_D11G08976.gene	Ghi_D05G07006.gene
Ghi_A10G08901.gene	Ghi_A03G04336.gene	Ghi_A08G04516.gene			Ghi_A13G06231.gene	Ghi_D02G11256.gene	Ghi_D11G06611.gene
Ghi_A10G08906.gene	Ghi_D05G03536.gene	Ghi_D07G02966.gene			Ghi_A05G15176.gene	Ghi_A06G05531.gene	Ghi_A05G01661.gene
Ghi_D06G05636.gene	Ghi_D06G05586.gene	Ghi_D05G04101.gene			Ghi_D07G02851.gene	Ghi_D11G07831.gene	Ghi_A04G00786.gene
Ghi_D06G05631.gene	Ghi_A07G13561.gene	Ghi_A03G13006.gene			Ghi_A04G02421.gene	Ghi_A05G04301.gene	Ghi_A08G02011.gene
Ghi_D05G09406.gene	Ghi_A05G09931.gene	Ghi_A05G12861.gene			Ghi_A10G01966.gene	Ghi_D12G01276.gene	Ghi_A04G00256.gene
Ghi_D04G06561.gene	Ghi_D12G13641.gene	Ghi_A12G06646.gene			Ghi_D13G00611.gene	Ghi_A10G01981.gene	Ghi_A04G00251.gene
Ghi_A09G11036.gene	Ghi_D10G00671.gene	Ghi_D02G10766.gene			Ghi_D13G00616.gene	Ghi_D03G08671.gene	Ghi_D08G05431.gene
Ghi_D11G17171.gene	Ghi_D11G13966.gene	Ghi_D04G01306.gene			Ghi_D05G08846.gene	Ghi_D09G01946.gene	Ghi_D05G03611.gene
Ghi_D04G02416.gene	Ghi_A11G16921.gene	Ghi_A03G11981.gene			Ghi_D10G11236.gene	Ghi_D06G08636.gene	Ghi_A09G04301.gene
Ghi_A04G03866.gene	Ghi_A10G03366.gene	Ghi_D12G02171.gene			Ghi_D05G05696.gene	Ghi_A06G01631.gene	Ghi_D11G15516.gene
Ghi_A11G14901.gene	Ghi_A03G11011.gene	Ghi_D01G01566.gene			Ghi_A09G13376.gene	Ghi_A03G06841.gene	Ghi_D06G00221.gene
Ghi_D01G03216.gene	Ghi_A07G06171.gene	Ghi_D07G00426.gene			Ghi_A09G06496.gene	Ghi_D07G11401.gene	Ghi_D06G00226.gene
Ghi_A05G17246.gene	Ghi_D05G06711.gene	Ghi_D12G04101.gene			Ghi_D01G10156.gene	Ghi_D02G11866.gene	Ghi_A13G00456.gene
Ghi_D01G09741.gene	Ghi_A05G12806.gene	Ghi_A06G11601.gene			Ghi_A12G01721.gene	Ghi_A05G22041.gene	Ghi_D11G17916.gene
Ghi_D04G01036.gene	Ghi_A06G12506.gene	Ghi_D05G09056.gene			Ghi_A05G11676.gene	Ghi_D10G04501.gene	Ghi_A10G07611.gene
Ghi_D04G01031.gene	Ghi_A12G15371.gene	Ghi_D09G06386.gene			Ghi_D12G15951.gene	Ghi_D04G07866.gene	Ghi_A06G01766.gene
Ghi_A13G04036.gene	Ghi_D11G15476.gene	Ghi_A05G22246.gene			Ghi_D12G15956.gene	Ghi_D04G07861.gene	Ghi_D02G09011.gene
Ghi_D13G10401.gene	Ghi_A01G11916.gene	Ghi_A05G21911.gene			Ghi_D04G02381.gene	Ghi_D10G11356.gene	Ghi_D10G10101.gene
GhiUnG01936.gene	Ghi_D05G07976.gene	Ghi_A12G07186.gene			Ghi_A05G21656.gene	Ghi_D08G12371.gene	Ghi_A05G02886.gene
Ghi_A06G09586.gene	Ghi_D13G06781.gene	Ghi_A02G09921.gene			Ghi_A01G01271.gene	Ghi_A07G03816.gene	Ghi_A11G16506.gene
Ghi_A07G01486.gene	Ghi_A05G12051.gene	Ghi_D10G02326.gene			Ghi_D04G01616.gene	Ghi_D06G05756.gene	Ghi_A05G05351.gene
Ghi_A11G18116.gene	Ghi_A05G06596.gene	Ghi_A02G08031.gene			Ghi_A03G09821.gene	Ghi_D05G04976.gene	Ghi_D09G11316.gene
Ghi_A11G15746.gene	Ghi_A09G11676.gene	Ghi_A03G06406.gene			Ghi_D11G14506.gene	Ghi_A09G13431.gene	Ghi_D06G01481.gene
Ghi_A11G18111.gene	Ghi_A11G06921.gene	Ghi_A03G01441.gene			Ghi_D03G04016.gene	Ghi_A08G01401.gene	Ghi_A12G10911.gene
Ghi_A07G04056.gene	Ghi_D11G12526.gene	Ghi_D11G06666.gene			Ghi_A02G00996.gene	Ghi_D06G10141.gene	Ghi_A13G04101.gene
Ghi_A10G14331.gene	Ghi_A05G02971.gene	Ghi_D12G13061.gene			Ghi_D11G11741.gene	Ghi_A12G02571.gene	Ghi_A06G02421.gene
Ghi_A12G13486.gene	Ghi_A09G09351.gene	Ghi_D10G04056.gene			Ghi_D04G03811.gene	Ghi_D07G10961.gene	Ghi_D10G06911.gene
Ghi_A06G03066.gene	Ghi_D02G04636.gene	Ghi_A13G14701.gene			Ghi_D06G11216.gene	Ghi_A04G00151.gene	Ghi_A11G18061.gene
Ghi_A09G11771.gene	Ghi_D07G07936.gene	Ghi_D02G09696.gene			Ghi_A12G03011.gene	Ghi_D06G07466.gene	Ghi_D13G12876.gene
Ghi_A08G11166.gene	Ghi_A08G04411.gene	Ghi_D08G11771.gene			Ghi_D08G14471.gene	Ghi_D11G06701.gene	Ghi_A03G07601.gene
Ghi_A04G01206.gene	Ghi_A07G11761.gene	Ghi_D03G10056.gene			Ghi_A01G04281.gene	Ghi_D05G10936.gene	Ghi_D13G11161.gene
Ghi_A11G02361.gene	Ghi_A06G05441.gene	Ghi_A06G06236.gene			Ghi_D05G00391.gene	Ghi_A10G02231.gene	Ghi_A05G20521.gene
Ghi_A09G13916.gene	Ghi_D01G03066.gene	Ghi_D05G08526.gene			Ghi_A12G14296.gene	Ghi_A10G01521.gene	Ghi_A07G04971.gene
Ghi_D04G00076.gene	Ghi_A05G08831.gene	Ghi_D04G02371.gene			Ghi_A11G05101.gene	Ghi_A08G13151.gene	Ghi_A09G12936.gene
Ghi_D02G04611.gene	Ghi_A07G00631.gene	Ghi_D11G12666.gene			Ghi_D02G09991.gene	Ghi_D08G13921.gene	Ghi_D09G06916.gene
Ghi_A02G00981.gene	Ghi_A10G05571.gene	Ghi_A11G14846.gene			Ghi_A02G09196.gene	Ghi_A12G03541.gene	Ghi_A09G08621.gene
Ghi_A03G06646.gene	Ghi_A05G07901.gene	Ghi_A02G04831.gene			Ghi_A11G01481.gene	Ghi_A06G00391.gene	Ghi_D02G10456.gene
Ghi_A08G03196.gene	Ghi_A05G01536.gene	Ghi_A10G02926.gene			Ghi_D09G03826.gene	Ghi_A12G01781.gene	Ghi_D08G00716.gene
Ghi_A02G00916.gene	Ghi_A05G12211.gene	Ghi_D02G08316.gene			Ghi_A08G14176.gene	Ghi_D06G04626.gene	Ghi_D03G03836.gene
Ghi_D09G08341.gene	Ghi_A12G08426.gene	Ghi_A07G04226.gene			Ghi_A01G03361.gene	Ghi_A08G12631.gene	Ghi_A13G13331.gene
Ghi_D02G02876.gene	Ghi_A04G05136.gene	Ghi_A05G16861.gene			Ghi_A01G02016.gene	Ghi_A03G09186.gene	Ghi_A05G00936.gene
Ghi_D05G11241.gene	Ghi_D04G08316.gene	Ghi_A10G14056.gene			Ghi_A05G22846.gene	Ghi_A05G13021.gene	Ghi_A02G01581.gene
Ghi_D02G03471.gene	Ghi_D03G03521.gene	Ghi_A02G02861.gene			Ghi_A03G09456.gene	Ghi_D12G12956.gene	Ghi_D12G09271.gene
Ghi_D12G08031.gene	Ghi_A10G12956.gene	Ghi_A11G05076.gene			Ghi_D05G01696.gene	Ghi_D07G13051.gene	Ghi_A13G13011.gene
Ghi_D12G08036.gene	Ghi_A03G06956.gene	Ghi_A03G06101.gene			Ghi_A05G03276.gene	Ghi_D11G07151.gene	Ghi_A05G13571.gene
Ghi_A02G01291.gene	Ghi_A11G18376.gene	Ghi_A11G01751.gene			Ghi_D11G03576.gene	Ghi_A01G03441.gene	Ghi_D06G03806.gene
Ghi_A06G08811.gene	Ghi_A09G07416.gene	Ghi_D11G15021.gene			Ghi_A07G13941.gene	Ghi_A05G18801.gene	Ghi_A01G06421.gene
Ghi_A05G03166.gene	Ghi_A05G23776.gene	Ghi_A02G06866.gene			Ghi_A07G09451.gene	Ghi_A09G06091.gene	Ghi_D11G00446.gene
Ghi_A13G01871.gene	Ghi_A11G13566.gene	Ghi_A05G10856.gene			Ghi_A04G01541.gene	Ghi_D08G08896.gene	Ghi_A12G07521.gene
Ghi_A13G01876.gene	Ghi_D04G01596.gene	Ghi_A12G11161.gene			Ghi_D08G12161.gene	Ghi_D11G14286.gene	Ghi_A05G10556.gene
Ghi_A01G03871.gene	Ghi_A05G23196.gene	Ghi_D05G02091.gene			Ghi_A02G08691.gene	Ghi_A08G05216.gene	GhiUnG00611.gene
Ghi_A05G13156.gene	Ghi_D06G07961.gene	Ghi_A08G14181.gene			Ghi_D08G06306.gene	Ghi_D09G06486.gene	Ghi_A01G05211.gene
Ghi_A05G13151.gene	Ghi_D07G00161.gene	Ghi_A05G16041.gene			Ghi_D05G14291.gene	Ghi_D09G03141.gene	Ghi_A08G03216.gene
Ghi_D07G07526.gene	Ghi_D02G11406.gene	Ghi_D09G11516.gene			Ghi_D05G12191.gene	Ghi_D01G02806.gene	Ghi_A06G05506.gene
Ghi_D09G11431.gene	Ghi_D03G10151.gene	Ghi_D11G12341.gene			Ghi_A01G01731.gene	Ghi_D07G13221.gene	Ghi_A07G13281.gene
Ghi_D07G11931.gene	Ghi_A01G10491.gene	Ghi_A13G03771.gene			Ghi_D11G18081.gene	Ghi_D01G05871.gene	Ghi_A01G10471.gene
Ghi_A07G09036.gene	Ghi_D01G01801.gene	Ghi_A10G10896.gene			Ghi_A08G07166.gene	Ghi_A10G01016.gene	Ghi_D01G02071.gene
Ghi_D12G01516.gene	Ghi_D12G13151.gene	Ghi_D10G05141.gene			Ghi_D05G02571.gene	Ghi_A12G14316.gene	Ghi_A03G01666.gene
Ghi_A13G11636.gene	Ghi_A02G03226.gene	Ghi_A06G01051.gene			Ghi_D04G06136.gene	Ghi_A06G05231.gene	Ghi_D12G10686.gene
Ghi_D03G01841.gene	Ghi_D11G13676.gene	Ghi_A12G14276.gene			Ghi_D11G01881.gene	Ghi_A13G02011.gene	Ghi_D11G02936.gene
Ghi_A05G03786.gene	Ghi_D06G00576.gene	Ghi_D05G06901.gene			Ghi_D13G13346.gene	Ghi_D11G08316.gene	Ghi_D06G04586.gene
Ghi_D03G07986.gene	Ghi_A07G03186.gene	Ghi_A05G01111.gene			Ghi_D11G07481.gene	Ghi_A10G02401.gene	Ghi_A13G02026.gene
Ghi_D13G04521.gene	Ghi_A10G11436.gene	Ghi_D04G09286.gene			Ghi_D08G10141.gene	Ghi_A13G00791.gene	Ghi_D05G09951.gene
Ghi_D03G07146.gene	Ghi_A05G16671.gene	Ghi_A09G08941.gene			Ghi_D01G01866.gene	Ghi_D11G04126.gene	Ghi_D06G03586.gene
Ghi_A08G12616.gene	Ghi_A08G12671.gene	Ghi_A09G01731.gene			Ghi_A11G17986.gene	Ghi_D05G02551.gene	Ghi_D07G03031.gene
Ghi_A12G00761.gene	Ghi_A11G16131.gene	Ghi_D07G12496.gene			Ghi_D07G09331.gene	Ghi_A13G13111.gene	Ghi_A11G13596.gene
Ghi_A07G02616.gene	Ghi_A09G11776.gene	Ghi_D02G12221.gene			Ghi_D07G09336.gene	Ghi_D13G09461.gene	Ghi_A11G13591.gene
Ghi_D05G14576.gene	Ghi_A03G09146.gene	Ghi_A13G09396.gene			Ghi_D11G00686.gene	Ghi_D02G02086.gene	Ghi_D06G03056.gene
Ghi_D01G03106.gene	Ghi_A03G05646.gene	Ghi_D08G10991.gene			Ghi_A12G07031.gene	Ghi_A11G00366.gene	Ghi_D09G06416.gene
Ghi_D02G04901.gene	Ghi_D04G10036.gene	Ghi_A12G00276.gene			Ghi_A12G07036.gene	Ghi_A05G01436.gene	Ghi_A07G12246.gene
Ghi_A01G06081.gene	Ghi_A09G10691.gene	Ghi_A13G04051.gene			Ghi_D08G05021.gene	Ghi_D09G06511.gene	Ghi_A06G02626.gene
Ghi_A13G08206.gene	Ghi_D03G05366.gene	Ghi_A07G05961.gene			Ghi_A02G08156.gene	Ghi_A01G05851.gene	Ghi_D03G06026.gene
Ghi_A01G07686.gene	Ghi_D10G01961.gene	Ghi_A08G15226.gene			Ghi_A06G07986.gene	Ghi_A09G14331.gene	Ghi_D12G16351.gene
Ghi_A12G07411.gene	Ghi_A03G02911.gene	Ghi_A10G14396.gene			Ghi_D02G07581.gene	Ghi_D09G02991.gene	Ghi_D06G04871.gene
Ghi_A07G14121.gene	Ghi_A07G04381.gene	Ghi_A01G02146.gene			Ghi_D07G06026.gene	Ghi_A05G09371.gene	Ghi_D07G01951.gene
Ghi_A05G10711.gene	Ghi_D07G12216.gene	Ghi_D01G04251.gene			Ghi_D10G07846.gene	Ghi_A07G12111.gene	Ghi_A11G00526.gene
Ghi_A03G03626.gene	Ghi_D08G02356.gene	Ghi_D01G04256.gene			Ghi_D08G14136.gene	Ghi_A08G00741.gene	Ghi_A10G04721.gene
Ghi_A01G01681.gene	Ghi_D08G02351.gene	Ghi_A03G04336.gene			Ghi_A06G02006.gene	Ghi_A01G02711.gene	Ghi_D04G05776.gene
Ghi_A01G01686.gene	Ghi_A09G06321.gene	Ghi_A02G02766.gene			Ghi_A13G07871.gene	Ghi_A05G18706.gene	Ghi_A02G07776.gene
Ghi_D01G03876.gene	Ghi_D05G10946.gene	Ghi_A03G12026.gene			Ghi_A11G16166.gene	Ghi_A03G11586.gene	Ghi_D12G07271.gene
Ghi_A10G13126.gene	Ghi_D05G10941.gene	Ghi_D06G10531.gene			Ghi_D06G09031.gene	Ghi_A11G00131.gene	Ghi_A09G12071.gene
Ghi_A13G14241.gene	Ghi_A05G01011.gene	Ghi_A03G03646.gene			Ghi_A02G03491.gene	Ghi_A13G06636.gene	Ghi_D10G05856.gene
Ghi_A05G05256.gene	Ghi_D07G01111.gene	Ghi_A06G00681.gene			Ghi_D07G07371.gene	Ghi_A13G00771.gene	Ghi_D11G15706.gene
Ghi_D04G10011.gene	Ghi_D12G07906.gene	Ghi_A07G13561.gene			Ghi_A04G06386.gene	Ghi_D01G07646.gene	Ghi_D05G04446.gene
Ghi_D01G02491.gene	Ghi_A11G01306.gene	Ghi_A01G00176.gene			Ghi_D01G03836.gene	Ghi_A08G03021.gene	Ghi_A11G09256.gene
Ghi_A02G08746.gene	Ghi_A05G12986.gene	Ghi_D01G09871.gene			Ghi_D01G03831.gene	Ghi_D05G00656.gene	Ghi_D12G00136.gene
Ghi_A05G22646.gene	Ghi_D11G07781.gene	Ghi_A01G03486.gene			Ghi_D11G11921.gene	Ghi_D01G09776.gene	Ghi_D08G03906.gene
Ghi_A05G11441.gene	Ghi_A05G16476.gene	Ghi_A11G02441.gene			Ghi_D01G08111.gene	Ghi_A04G00276.gene	Ghi_A02G00201.gene
Ghi_D09G05341.gene	Ghi_A02G04946.gene	Ghi_D12G13641.gene			Ghi_D07G00686.gene	Ghi_D11G15686.gene	Ghi_A05G23561.gene
Ghi_A08G09266.gene	Ghi_D03G03771.gene	Ghi_A07G01336.gene			Ghi_A03G01001.gene	Ghi_A13G11836.gene	Ghi_D05G05791.gene
Ghi_A11G17876.gene	Ghi_A07G12736.gene	Ghi_A12G11701.gene			Ghi_D04G09706.gene	Ghi_D13G03891.gene	Ghi_D10G11466.gene
Ghi_D02G00566.gene	Ghi_D09G09636.gene	Ghi_A07G06171.gene			Ghi_A02G00906.gene	Ghi_D08G07671.gene	Ghi_A08G02291.gene
Ghi_D05G12976.gene	Ghi_A09G13946.gene	Ghi_A11G05406.gene			Ghi_A05G00896.gene	Ghi_D08G00081.gene	Ghi_A06G12101.gene
Ghi_A10G14471.gene	Ghi_A05G14161.gene	Ghi_A06G12506.gene			Ghi_A12G10601.gene	Ghi_D01G10471.gene	Ghi_D12G15921.gene
Ghi_A10G09106.gene	Ghi_D05G14521.gene	Ghi_D05G07976.gene			Ghi_A05G09621.gene	Ghi_D05G13261.gene	Ghi_A07G01161.gene
Ghi_D03G09456.gene	Ghi_D05G14526.gene	Ghi_D13G09496.gene			Ghi_A09G13516.gene	Ghi_D10G01816.gene	Ghi_A03G09851.gene
Ghi_A02G09836.gene	Ghi_D03G02916.gene	Ghi_A09G14756.gene			Ghi_D12G16061.gene	Ghi_D06G01326.gene	Ghi_A11G08316.gene
Ghi_D11G07171.gene	Ghi_D12G11021.gene	Ghi_A11G02126.gene			Ghi_A06G04516.gene	Ghi_D12G07251.gene	Ghi_A06G08746.gene
Ghi_A10G13276.gene	Ghi_A07G05826.gene	Ghi_A10G11321.gene			Ghi_A12G03256.gene	Ghi_D12G06646.gene	Ghi_D05G11851.gene
Ghi_D04G10901.gene	Ghi_A12G14621.gene	Ghi_D02G04371.gene			Ghi_A11G05736.gene	Ghi_D02G10296.gene	Ghi_A10G04846.gene
Ghi_A08G00181.gene	Ghi_A08G10846.gene	Ghi_A09G11676.gene			Ghi_D01G11441.gene	Ghi_D08G00296.gene	GhiUnG01986.gene
Ghi_A08G00186.gene	Ghi_A09G14416.gene	Ghi_A11G06926.gene			Ghi_D13G10101.gene	Ghi_D08G11706.gene	Ghi_A08G11751.gene
Ghi_D12G09151.gene	Ghi_D12G09116.gene	Ghi_D10G11886.gene			Ghi_A11G06421.gene	Ghi_A09G00426.gene	Ghi_A08G15276.gene
Ghi_A09G09641.gene	Ghi_A11G02621.gene	Ghi_A02G03026.gene			Ghi_A11G01431.gene	Ghi_D02G04096.gene	Ghi_A05G07946.gene
Ghi_A01G03466.gene	Ghi_D01G05716.gene	Ghi_A05G02971.gene			Ghi_D11G15121.gene	Ghi_A11G04601.gene	Ghi_A03G10936.gene
Ghi_A01G03461.gene	Ghi_A01G08146.gene	Ghi_A05G10961.gene			Ghi_D11G10331.gene	Ghi_D03G02761.gene	Ghi_A09G08691.gene
Ghi_A12G09901.gene	Ghi_A05G20741.gene	Ghi_D08G01101.gene			Ghi_A04G05291.gene	Ghi_A06G00121.gene	Ghi_D03G00506.gene
Ghi_D05G03936.gene	Ghi_D04G07731.gene	Ghi_D05G00651.gene			Ghi_D09G04641.gene	Ghi_D07G12721.gene	Ghi_A06G12921.gene
Ghi_D03G05411.gene	Ghi_A12G12281.gene	Ghi_A08G03051.gene			Ghi_D03G00821.gene	Ghi_D08G02806.gene	Ghi_D06G12661.gene
Ghi_A07G02736.gene	Ghi_D07G07796.gene	Ghi_A09G09351.gene			Ghi_D12G03991.gene	Ghi_D10G00746.gene	Ghi_A08G14586.gene
Ghi_A11G16451.gene	Ghi_D02G10871.gene	Ghi_A03G09511.gene			Ghi_A10G06446.gene	Ghi_A06G04146.gene	Ghi_A06G09936.gene
Ghi_A01G00841.gene	Ghi_D13G11946.gene	Ghi_A03G00716.gene			Ghi_A04G05746.gene	Ghi_D07G04266.gene	Ghi_D08G00106.gene
Ghi_A08G07356.gene	Ghi_D11G01086.gene	Ghi_A01G12806.gene			Ghi_D13G04031.gene	Ghi_D02G12061.gene	Ghi_A02G01261.gene
Ghi_A02G07706.gene	Ghi_A08G02076.gene	Ghi_D07G07936.gene			Ghi_A13G12196.gene	Ghi_D06G02276.gene	Ghi_D05G10431.gene
Ghi_D08G07951.gene	Ghi_D11G01331.gene	Ghi_D13G02956.gene			Ghi_A12G09581.gene	Ghi_D09G09731.gene	Ghi_D11G06486.gene
Ghi_D06G01371.gene	Ghi_A10G00886.gene	Ghi_A11G15866.gene			Ghi_D12G09346.gene	Ghi_A04G03171.gene	Ghi_D11G08426.gene
Ghi_A11G12511.gene	Ghi_D08G10726.gene	Ghi_D12G10496.gene			Ghi_A08G14376.gene	Ghi_D10G12741.gene	Ghi_A10G02601.gene
Ghi_D05G01786.gene	Ghi_A05G17136.gene	Ghi_A05G11081.gene			Ghi_A01G11841.gene	Ghi_A01G09886.gene	Ghi_A08G06146.gene
Ghi_A10G02866.gene	Ghi_A09G12311.gene	Ghi_D03G04431.gene			Ghi_A12G08116.gene	Ghi_A02G00301.gene	Ghi_D08G12041.gene
Ghi_A08G06721.gene	Ghi_A05G02641.gene	Ghi_A05G09056.gene			Ghi_A05G02256.gene	Ghi_A08G02696.gene	Ghi_A05G22076.gene
Ghi_D10G09686.gene	Ghi_A05G10266.gene	Ghi_A05G00486.gene			Ghi_D05G08496.gene	Ghi_D01G05011.gene	Ghi_D06G00601.gene
Ghi_A08G09801.gene	Ghi_A12G07936.gene	Ghi_D08G11926.gene			Ghi_A07G13741.gene	Ghi_D09G05976.gene	Ghi_D01G08026.gene
Ghi_D08G14626.gene	Ghi_A02G01521.gene	Ghi_D06G10181.gene			Ghi_A08G13941.gene	Ghi_D03G00156.gene	Ghi_D12G02791.gene
Ghi_D03G06731.gene	Ghi_D07G12086.gene	Ghi_A12G08426.gene			Ghi_A08G14991.gene	Ghi_D11G02991.gene	Ghi_A08G00841.gene
Ghi_A03G10071.gene	Ghi_A03G11356.gene	Ghi_D12G15796.gene			Ghi_A02G00131.gene	Ghi_A09G04891.gene	Ghi_A01G00501.gene
Ghi_D12G03591.gene	Ghi_A03G10366.gene	Ghi_D04G08316.gene			Ghi_A13G09481.gene	Ghi_A12G14266.gene	Ghi_D10G07216.gene
Ghi_D01G00186.gene	Ghi_A05G15601.gene	Ghi_D10G07786.gene			Ghi_D03G01676.gene	Ghi_D08G07081.gene	Ghi_A01G00186.gene
Ghi_D05G01796.gene	Ghi_D08G02276.gene	Ghi_D10G08081.gene			Ghi_A11G05221.gene	Ghi_A03G00211.gene	Ghi_D07G01161.gene
Ghi_D08G12661.gene	Ghi_A03G08431.gene	Ghi_A05G22361.gene			Ghi_D01G10691.gene	Ghi_A11G18321.gene	Ghi_A01G05001.gene
Ghi_A11G15186.gene	Ghi_A05G17811.gene	Ghi_A03G06956.gene			Ghi_A12G12141.gene	Ghi_D13G02561.gene	Ghi_D07G02486.gene
Ghi_A09G00271.gene	Ghi_A05G08256.gene	Ghi_A05G21106.gene			Ghi_A11G15376.gene	Ghi_D12G11276.gene	Ghi_D11G06816.gene
Ghi_A01G06946.gene	Ghi_A03G12116.gene	Ghi_D10G02201.gene			Ghi_D03G07561.gene	Ghi_D05G04281.gene	Ghi_D12G14231.gene
Ghi_A09G08066.gene	Ghi_D02G01471.gene	Ghi_D01G02531.gene			Ghi_D01G04161.gene	Ghi_A11G05586.gene	Ghi_A11G02411.gene
Ghi_D08G07226.gene	Ghi_D04G00191.gene	Ghi_A11G18376.gene			Ghi_A05G22536.gene	Ghi_D10G12301.gene	Ghi_A01G08401.gene
Ghi_A03G05346.gene	Ghi_D09G04411.gene	Ghi_D02G03341.gene			Ghi_D07G04501.gene	Ghi_D06G02816.gene	Ghi_A08G01846.gene
Ghi_D11G04881.gene	Ghi_D07G02321.gene	Ghi_A05G23776.gene			Ghi_A09G06196.gene	Ghi_D04G05596.gene	Ghi_D08G04126.gene
Ghi_D05G01426.gene	Ghi_D09G01206.gene	Ghi_A11G13566.gene			Ghi_D07G10486.gene	Ghi_D06G09041.gene	Ghi_A11G16391.gene
Ghi_D08G07221.gene	Ghi_A09G14101.gene	Ghi_D04G05781.gene			Ghi_D12G05026.gene	Ghi_D02G00486.gene	Ghi_D05G01301.gene
Ghi_D05G02681.gene	Ghi_A06G07651.gene	Ghi_D10G00546.gene			Ghi_A03G08256.gene	Ghi_A03G07806.gene	Ghi_D12G13616.gene
Ghi_D01G01581.gene	Ghi_A03G11831.gene	Ghi_D06G05901.gene			Ghi_A05G16956.gene	Ghi_A08G07656.gene	Ghi_A05G24046.gene
Ghi_A10G03406.gene	Ghi_D12G11856.gene	Ghi_A04G04651.gene			Ghi_A11G15806.gene	Ghi_A08G05656.gene	Ghi_A05G11826.gene
Ghi_D01G01586.gene	Ghi_D01G09221.gene	Ghi_D01G02671.gene			Ghi_D10G10446.gene	Ghi_A06G06266.gene	Ghi_D13G11816.gene
Ghi_A09G05571.gene	Ghi_A13G11176.gene	Ghi_A07G12436.gene			Ghi_A07G04396.gene	Ghi_D10G06671.gene	Ghi_D13G11811.gene
Ghi_A06G03661.gene	Ghi_A12G03581.gene	Ghi_A10G11176.gene			Ghi_A08G03901.gene	Ghi_D12G10951.gene	Ghi_A11G16976.gene
Ghi_A09G11076.gene	Ghi_D11G01271.gene	Ghi_D01G01801.gene			Ghi_A10G13936.gene	Ghi_D08G10516.gene	Ghi_A04G07536.gene
Ghi_A03G10926.gene	Ghi_D12G00196.gene	Ghi_A01G00516.gene			Ghi_A07G08371.gene	Ghi_D12G15821.gene	Ghi_D13G13556.gene
Ghi_D10G00486.gene	Ghi_D05G05306.gene	Ghi_D01G11296.gene			Ghi_A05G02361.gene	Ghi_A07G01061.gene	Ghi_A09G10266.gene
Ghi_D10G05471.gene	Ghi_D07G11056.gene	Ghi_A03G07546.gene			Ghi_A02G02176.gene	Ghi_D03G08636.gene	GhiUnG03211.gene
Ghi_A08G07541.gene	Ghi_D04G07006.gene	Ghi_D12G02951.gene			Ghi_A05G21371.gene	Ghi_D12G08556.gene	Ghi_A10G01101.gene
Ghi_D04G09011.gene	Ghi_A03G00346.gene	Ghi_D13G10421.gene			Ghi_D10G12176.gene	Ghi_D03G01391.gene	Ghi_A12G01146.gene
Ghi_A11G00456.gene	Ghi_D05G09746.gene	Ghi_D06G08901.gene			Ghi_D05G11131.gene	Ghi_A05G16921.gene	Ghi_A09G06001.gene
Ghi_D05G12566.gene	Ghi_D09G03021.gene	Ghi_D01G07756.gene			Ghi_D11G00911.gene	Ghi_D05G03041.gene	Ghi_A11G02886.gene
Ghi_A05G00786.gene	Ghi_A07G01851.gene	Ghi_A11G06446.gene			Ghi_A07G03716.gene	Ghi_D01G02786.gene	Ghi_D08G13541.gene
Ghi_A11G06116.gene	Ghi_A08G13366.gene	Ghi_D02G09756.gene			Ghi_A10G11096.gene	Ghi_A08G12211.gene	Ghi_D08G13546.gene
Ghi_D11G10426.gene	Ghi_A09G15396.gene	Ghi_A07G03186.gene			Ghi_A07G12176.gene	Ghi_D13G00361.gene	Ghi_D12G07336.gene
Ghi_A10G10166.gene	Ghi_A05G16581.gene	Ghi_D05G09781.gene			Ghi_A08G00766.gene	Ghi_D05G10501.gene	Ghi_D12G07331.gene
Ghi_A08G09396.gene	Ghi_A01G06021.gene	Ghi_A02G07796.gene			Ghi_A05G20026.gene	Ghi_D05G03886.gene	Ghi_A10G10281.gene
Ghi_D08G03836.gene	Ghi_D05G05446.gene	Ghi_A07G05386.gene			Ghi_D05G14121.gene	Ghi_D05G03881.gene	Ghi_D04G03946.gene
Ghi_D08G03831.gene	Ghi_A11G10801.gene	Ghi_A05G16671.gene			Ghi_A12G14481.gene	Ghi_A06G10526.gene	Ghi_D12G01651.gene
Ghi_A05G07066.gene	Ghi_D07G08491.gene	Ghi_A08G12671.gene			Ghi_D08G04206.gene	Ghi_A11G12446.gene	Ghi_D09G08806.gene
Ghi_A12G01581.gene	Ghi_A01G04071.gene	Ghi_D04G07316.gene			Ghi_D08G09006.gene	Ghi_D04G09231.gene	Ghi_A09G14786.gene
Ghi_A08G04016.gene	Ghi_D11G05156.gene	Ghi_A13G09791.gene			Ghi_D11G06406.gene	Ghi_D02G11416.gene	Ghi_D03G05466.gene
Ghi_A10G01711.gene	Ghi_D06G07841.gene	Ghi_D02G01741.gene			Ghi_A07G13221.gene	Ghi_D11G10456.gene	Ghi_A01G10036.gene
Ghi_D11G00766.gene	Ghi_A03G04016.gene	Ghi_A05G19856.gene			Ghi_D08G08756.gene	Ghi_D03G09726.gene	Ghi_A09G11096.gene
Ghi_D12G10981.gene	Ghi_D01G04576.gene	Ghi_A13G09131.gene			Ghi_D05G06841.gene	Ghi_D12G10506.gene	Ghi_A05G06016.gene
Ghi_D05G07486.gene	Ghi_D10G11571.gene	Ghi_A08G06246.gene			Ghi_A09G05641.gene	Ghi_A06G07626.gene	Ghi_A07G02226.gene
Ghi_D05G07481.gene	Ghi_D02G11566.gene	Ghi_A10G12856.gene			Ghi_A11G11821.gene	Ghi_D01G08141.gene	Ghi_D03G01921.gene
Ghi_D03G07116.gene	Ghi_D11G15306.gene	Ghi_A08G04371.gene			Ghi_A11G14241.gene	Ghi_D07G00566.gene	Ghi_A12G08381.gene
Ghi_D04G07556.gene	Ghi_A11G10201.gene	Ghi_A06G07496.gene			Ghi_A02G00896.gene	Ghi_D01G11191.gene	Ghi_A07G14086.gene
Ghi_D04G03641.gene	Ghi_D06G01876.gene	Ghi_D10G03476.gene			Ghi_A12G15281.gene	Ghi_D09G02966.gene	Ghi_D08G00646.gene
Ghi_A09G13106.gene	Ghi_D06G00101.gene	Ghi_A08G02136.gene			Ghi_A08G02261.gene	Ghi_A13G01471.gene	Ghi_A01G02626.gene
Ghi_A10G11696.gene	Ghi_D12G14786.gene	Ghi_D10G07586.gene			Ghi_D05G03401.gene	Ghi_A03G12556.gene	Ghi_D11G09156.gene
Ghi_A09G13101.gene	Ghi_A09G03461.gene	Ghi_A08G04036.gene			Ghi_D05G03406.gene	Ghi_D11G11876.gene	Ghi_D06G10101.gene
Ghi_D01G03816.gene	Ghi_D13G09126.gene	Ghi_D11G07781.gene			Ghi_D11G05176.gene	Ghi_D12G14096.gene	Ghi_A12G00386.gene
Ghi_A09G06681.gene	Ghi_A12G05821.gene	Ghi_D05G08981.gene			Ghi_D07G05971.gene	Ghi_A13G04581.gene	Ghi_A12G00381.gene
Ghi_D11G17811.gene	Ghi_D13G08436.gene	Ghi_D13G04706.gene			Ghi_A06G11501.gene	Ghi_A01G12191.gene	Ghi_A09G06306.gene
Ghi_A09G07121.gene	Ghi_A06G09971.gene	Ghi_D13G08676.gene			Ghi_D11G04801.gene	Ghi_A13G11391.gene	Ghi_D09G05196.gene
Ghi_A04G03986.gene	Ghi_D06G12231.gene	Ghi_D01G03371.gene			Ghi_A06G11401.gene	Ghi_D12G11801.gene	Ghi_A01G05576.gene
Ghi_D06G00816.gene	Ghi_A11G02736.gene	Ghi_A07G04131.gene			Ghi_D08G03526.gene	Ghi_D05G10586.gene	Ghi_D11G10201.gene
Ghi_A02G05331.gene	Ghi_D06G01021.gene	Ghi_A07G00301.gene			Ghi_D04G04116.gene	Ghi_D08G13176.gene	Ghi_A06G00071.gene
Ghi_D11G08231.gene	Ghi_D09G01761.gene	Ghi_A12G13501.gene			Ghi_D08G04991.gene	Ghi_A10G05246.gene	Ghi_A08G00646.gene
Ghi_A13G12466.gene	Ghi_A05G11546.gene	Ghi_A11G18896.gene			Ghi_D06G04361.gene	Ghi_A13G02041.gene	Ghi_D10G01536.gene
Ghi_A05G12566.gene	GhiUnG00466.gene	Ghi_A03G07071.gene			Ghi_D07G00801.gene	Ghi_A12G01866.gene	Ghi_A12G09246.gene
Ghi_A04G06801.gene	Ghi_A03G02161.gene	Ghi_A05G16991.gene			Ghi_D05G07406.gene	Ghi_D03G02311.gene	Ghi_A03G01411.gene
Ghi_A07G02051.gene	Ghi_D10G01556.gene	Ghi_D09G05631.gene			Ghi_A04G08156.gene	Ghi_D02G00851.gene	Ghi_A07G08306.gene
Ghi_A04G06806.gene	Ghi_D08G14521.gene	Ghi_A12G08891.gene			Ghi_D07G04361.gene	Ghi_A12G10236.gene	Ghi_A06G09591.gene
Ghi_A05G14271.gene	Ghi_D13G03421.gene	Ghi_D07G12456.gene			Ghi_A08G09316.gene	Ghi_D08G08111.gene	Ghi_D08G08146.gene
Ghi_A07G14021.gene	Ghi_D10G00786.gene	Ghi_D11G04336.gene			Ghi_A02G00991.gene	Ghi_D01G11181.gene	Ghi_D11G06691.gene
Ghi_D11G13246.gene	Ghi_A13G10766.gene	Ghi_A06G12576.gene			Ghi_A06G00301.gene	Ghi_A06G00791.gene	Ghi_D05G13551.gene
Ghi_A03G00726.gene	Ghi_D07G00306.gene	Ghi_A12G04976.gene			Ghi_A06G00306.gene	Ghi_A07G06656.gene	Ghi_A01G12851.gene
Ghi_A04G07991.gene	Ghi_D01G00331.gene	Ghi_A10G13731.gene			Ghi_A13G11756.gene	Ghi_D13G10686.gene	Ghi_D07G07986.gene
Ghi_D05G12446.gene	Ghi_D11G03451.gene	Ghi_A05G21436.gene			Ghi_A04G05506.gene	Ghi_A11G01466.gene	Ghi_D02G08596.gene
Ghi_A09G15461.gene	Ghi_A05G00151.gene	Ghi_A04G05811.gene			Ghi_D08G11666.gene	Ghi_D05G08136.gene	Ghi_A09G04656.gene
Ghi_D06G09991.gene	Ghi_D13G12001.gene	Ghi_D11G07016.gene			Ghi_D11G06896.gene	Ghi_A13G00571.gene	Ghi_A11G14041.gene
Ghi_D01G06616.gene	Ghi_A09G05961.gene	Ghi_A08G01351.gene			Ghi_A01G05601.gene	Ghi_D07G00131.gene	Ghi_A10G02016.gene
Ghi_A07G05201.gene	Ghi_D12G00831.gene	Ghi_D13G04496.gene			Ghi_D13G01531.gene	Ghi_D13G00766.gene	Ghi_A03G11281.gene
Ghi_D07G10811.gene	Ghi_D01G03521.gene	Ghi_D13G11946.gene			Ghi_D12G12346.gene	Ghi_D05G09776.gene	Ghi_D13G00626.gene
Ghi_A13G04011.gene	Ghi_A02G04866.gene	Ghi_A11G06716.gene			Ghi_A02G03401.gene	Ghi_A06G06656.gene	Ghi_D01G04496.gene
Ghi_A11G17091.gene	Ghi_A01G12646.gene	Ghi_D07G13256.gene			Ghi_D04G01376.gene	Ghi_A13G02876.gene	Ghi_D01G00931.gene
Ghi_A05G05011.gene	Ghi_D06G08711.gene	Ghi_D11G01086.gene			Ghi_A08G02966.gene	Ghi_A12G11886.gene	Ghi_D01G00936.gene
Ghi_A07G00361.gene	Ghi_A05G06756.gene	Ghi_D04G02821.gene			Ghi_A11G04766.gene	Ghi_D05G04511.gene	Ghi_A12G04366.gene
Ghi_A01G12076.gene	Ghi_A02G01131.gene	Ghi_D12G00256.gene			Ghi_D02G08241.gene	Ghi_D05G00921.gene	Ghi_A03G12486.gene
Ghi_A01G12071.gene	Ghi_D10G12846.gene	Ghi_A09G14651.gene			Ghi_D01G07126.gene	Ghi_A11G00411.gene	Ghi_A10G09351.gene
Ghi_A12G13696.gene	Ghi_A12G12491.gene	Ghi_D09G07316.gene			Ghi_A12G13561.gene	Ghi_D11G16646.gene	Ghi_A03G08306.gene
Ghi_A09G13561.gene	Ghi_D07G03941.gene	Ghi_A05G21631.gene			Ghi_A08G09121.gene	Ghi_A11G18316.gene	Ghi_A08G09181.gene
Ghi_D10G11866.gene	Ghi_A06G00731.gene	Ghi_A12G07936.gene			Ghi_A12G10031.gene	Ghi_D04G01321.gene	Ghi_A10G04071.gene
Ghi_D11G02066.gene	Ghi_A08G07041.gene	Ghi_A07G11831.gene			Ghi_A08G11041.gene	Ghi_D04G01326.gene	Ghi_A10G04416.gene
Ghi_D13G12931.gene	Ghi_A01G02621.gene	Ghi_A11G05556.gene			Ghi_D11G03481.gene	Ghi_D11G03496.gene	Ghi_D07G09246.gene
Ghi_D11G02021.gene	Ghi_A09G15106.gene	Ghi_D12G07761.gene			Ghi_D12G11336.gene	Ghi_A09G03196.gene	Ghi_D07G05556.gene
Ghi_A11G08136.gene	Ghi_A01G04596.gene	GhiUnG03281.gene			Ghi_D07G05951.gene	Ghi_A05G13531.gene	Ghi_A01G00371.gene
Ghi_A11G00156.gene	Ghi_D13G03651.gene	Ghi_A07G03616.gene			Ghi_A09G11871.gene	Ghi_D08G09391.gene	Ghi_D06G00996.gene
Ghi_D05G14506.gene	Ghi_D08G06646.gene	Ghi_D11G05296.gene			Ghi_A11G08091.gene	Ghi_D03G01371.gene	Ghi_D13G01471.gene
Ghi_A11G05306.gene	Ghi_A08G02626.gene	Ghi_D11G01536.gene			Ghi_A09G07351.gene	Ghi_A13G02516.gene	Ghi_D11G17086.gene
Ghi_D10G13701.gene	Ghi_A09G02016.gene	Ghi_D13G00656.gene			Ghi_A12G00936.gene		Ghi_D02G09091.gene
Ghi_D12G09651.gene	Ghi_D04G08056.gene	Ghi_D07G01671.gene			Ghi_D01G08321.gene		Ghi_D13G07131.gene
Ghi_A12G03196.gene	Ghi_D13G09651.gene	Ghi_D07G02096.gene			Ghi_A03G02226.gene		Ghi_A10G07031.gene
Ghi_A07G08956.gene	Ghi_D03G08156.gene	Ghi_D07G02321.gene			Ghi_A07G04841.gene		Ghi_D07G06111.gene
Ghi_D11G09351.gene	Ghi_D02G12251.gene	Ghi_A10G13811.gene			Ghi_A07G04846.gene		Ghi_D12G14371.gene
Ghi_A10G02421.gene	Ghi_D04G07991.gene	Ghi_A06G07651.gene			Ghi_A11G05386.gene		Ghi_A10G06926.gene
Ghi_D11G02026.gene	Ghi_D03G02221.gene	Ghi_D06G09051.gene			Ghi_A05G04631.gene		Ghi_A12G04806.gene
Ghi_A05G20401.gene	Ghi_D13G13146.gene	Ghi_D05G05836.gene			Ghi_D11G08006.gene		Ghi_A11G16581.gene
Ghi_A03G08286.gene	Ghi_D13G00141.gene	Ghi_A02G00921.gene			Ghi_A05G10986.gene		Ghi_D06G09101.gene
Ghi_A06G09236.gene	Ghi_D12G01931.gene	Ghi_A06G04686.gene			Ghi_D01G00951.gene		Ghi_A01G12336.gene
Ghi_D11G09686.gene	Ghi_A12G00246.gene	Ghi_D01G09221.gene			Ghi_A07G07971.gene		Ghi_A01G04391.gene
Ghi_D11G09681.gene	Ghi_A10G00716.gene	Ghi_A09G02986.gene			Ghi_A12G14646.gene		Ghi_A07G01536.gene
Ghi_D11G04981.gene	Ghi_A12G00866.gene	Ghi_A13G11176.gene			Ghi_D05G07361.gene		Ghi_A11G15946.gene
Ghi_A03G01936.gene	Ghi_D11G02811.gene	Ghi_A08G14351.gene			Ghi_A11G07526.gene		Ghi_A09G12376.gene
Ghi_A12G06961.gene	Ghi_D09G05521.gene	Ghi_D10G12971.gene			Ghi_A12G01681.gene		Ghi_A11G01596.gene
Ghi_A12G06966.gene	Ghi_D01G11221.gene	Ghi_A07G01851.gene			Ghi_D05G02356.gene		Ghi_A09G11936.gene
Ghi_D06G12061.gene	Ghi_A07G12731.gene	Ghi_A08G13366.gene			Ghi_A08G06521.gene		Ghi_A13G14636.gene
Ghi_D09G10611.gene	Ghi_A02G01201.gene	Ghi_A07G04626.gene			Ghi_D13G06911.gene		Ghi_A10G05521.gene
Ghi_A12G02246.gene	Ghi_A10G12496.gene	Ghi_A08G11736.gene			Ghi_D13G06916.gene		Ghi_D02G09531.gene
Ghi_A12G02241.gene	Ghi_D07G12166.gene	Ghi_D12G15006.gene			Ghi_D08G08226.gene		Ghi_A05G07971.gene
Ghi_D11G08086.gene	Ghi_A05G03441.gene	Ghi_D09G05306.gene			Ghi_A06G12886.gene		Ghi_D13G06716.gene
Ghi_A03G09566.gene	Ghi_D07G04691.gene	Ghi_D02G07126.gene			Ghi_A05G03916.gene		Ghi_A05G04771.gene
Ghi_A07G12661.gene	Ghi_D04G10316.gene	Ghi_A01G04071.gene			Ghi_A05G15801.gene		Ghi_A06G11381.gene
Ghi_A02G09671.gene	Ghi_A06G04886.gene	Ghi_D10G09626.gene			Ghi_A12G00151.gene		Ghi_D03G08311.gene
Ghi_A12G15596.gene	Ghi_D01G00771.gene	Ghi_D05G03461.gene			Ghi_A13G09836.gene		Ghi_A02G01051.gene
Ghi_A08G10861.gene	Ghi_A03G09346.gene	Ghi_D08G07281.gene			Ghi_D09G06376.gene		Ghi_A11G14161.gene
Ghi_A08G10866.gene	Ghi_A01G11976.gene	Ghi_D06G01876.gene			Ghi_A05G10616.gene		Ghi_A02G01056.gene
Ghi_A07G00481.gene	Ghi_D12G02231.gene	Ghi_D06G03651.gene			Ghi_A05G10611.gene		Ghi_A03G13451.gene
Ghi_A12G12646.gene	Ghi_A07G13551.gene	Ghi_A01G10601.gene			Ghi_D11G16406.gene		Ghi_A07G12581.gene
Ghi_A03G01206.gene	Ghi_D10G00621.gene	Ghi_D07G02421.gene			Ghi_A03G09331.gene		Ghi_A04G08006.gene
Ghi_A09G10361.gene	Ghi_A13G11471.gene	Ghi_D12G04456.gene			Ghi_A13G08426.gene		Ghi_A05G06736.gene
Ghi_A09G10366.gene	Ghi_D05G02616.gene	Ghi_D12G14786.gene			Ghi_A12G07681.gene		Ghi_A05G13061.gene
Ghi_D04G08206.gene	Ghi_A11G07381.gene	Ghi_D06G09241.gene			Ghi_D01G04276.gene		Ghi_D09G11541.gene
Ghi_A12G08526.gene	Ghi_D08G13566.gene	Ghi_D11G05836.gene			Ghi_A13G01441.gene		Ghi_A07G13631.gene
Ghi_D05G06531.gene	Ghi_A05G20971.gene	Ghi_D13G03976.gene			Ghi_A05G21941.gene		Ghi_D09G11546.gene
Ghi_A05G13346.gene	Ghi_A11G07586.gene	Ghi_D13G09126.gene			Ghi_A05G05516.gene		Ghi_A12G15656.gene
Ghi_A05G13341.gene	Ghi_A13G02296.gene	Ghi_D12G00546.gene			Ghi_D09G07426.gene		Ghi_A12G15651.gene
Ghi_D05G06536.gene	Ghi_D10G11361.gene	Ghi_A11G05901.gene			Ghi_A10G13791.gene		Ghi_A07G13246.gene
Ghi_A07G01891.gene	Ghi_D10G11366.gene	Ghi_A05G12706.gene			Ghi_A05G19391.gene		Ghi_A11G10181.gene
Ghi_D05G14081.gene	Ghi_A13G02121.gene	Ghi_D07G01641.gene			Ghi_D10G13101.gene		Ghi_D01G05031.gene
Ghi_A13G02496.gene	Ghi_D05G04426.gene	Ghi_D06G12231.gene			Ghi_A11G15896.gene		Ghi_A12G08606.gene
Ghi_A03G08601.gene	Ghi_D10G03916.gene	Ghi_D02G01666.gene			Ghi_A12G10881.gene		Ghi_A03G06376.gene
Ghi_A08G12426.gene	Ghi_A04G07431.gene	Ghi_A12G13061.gene			Ghi_D01G10566.gene		Ghi_A10G12901.gene
Ghi_A08G12421.gene	Ghi_D11G09616.gene	Ghi_D03G04896.gene			Ghi_A05G11561.gene		Ghi_A10G14506.gene
Ghi_A03G12761.gene	Ghi_A05G12251.gene	Ghi_A06G00161.gene			Ghi_A09G10866.gene		Ghi_A05G13856.gene
Ghi_A03G12766.gene	Ghi_A08G07136.gene	Ghi_A10G14246.gene			Ghi_A07G10781.gene		Ghi_D01G10761.gene
Ghi_D10G10341.gene	Ghi_A03G06111.gene	Ghi_D05G02806.gene			Ghi_D01G10561.gene		Ghi_D03G05046.gene
Ghi_D07G01376.gene	Ghi_A01G05651.gene	Ghi_A11G04771.gene			Ghi_A06G10241.gene		Ghi_D03G05041.gene
Ghi_D07G09146.gene	Ghi_A10G10461.gene	Ghi_D01G02221.gene			Ghi_A05G19021.gene		Ghi_D07G03306.gene
Ghi_A04G06846.gene	Ghi_D08G05081.gene	Ghi_D07G03571.gene			Ghi_D03G00631.gene		Ghi_D10G00091.gene
Ghi_D06G03926.gene	Ghi_A06G02116.gene	Ghi_A13G02221.gene			Ghi_A01G03221.gene		Ghi_D10G04961.gene
Ghi_D07G05876.gene	Ghi_D04G01166.gene	Ghi_D08G06376.gene			Ghi_A01G04441.gene		Ghi_A08G00566.gene
Ghi_D11G11716.gene	Ghi_A01G09211.gene	Ghi_D07G13191.gene			Ghi_A06G00491.gene		Ghi_A01G03551.gene
Ghi_A12G07601.gene	Ghi_A08G03081.gene	Ghi_A07G13901.gene			Ghi_A11G02001.gene		Ghi_A11G13511.gene
Ghi_D05G12011.gene	Ghi_A04G02236.gene	Ghi_A13G11011.gene			Ghi_A06G00496.gene		Ghi_D11G07846.gene
Ghi_A11G10391.gene	Ghi_A03G01636.gene	Ghi_D07G07471.gene			Ghi_D07G02646.gene		Ghi_A09G13236.gene
Ghi_A05G19646.gene	Ghi_D13G12691.gene	Ghi_D07G11841.gene			Ghi_A10G09406.gene		Ghi_A12G14241.gene
Ghi_D03G09551.gene	Ghi_D06G10156.gene	Ghi_D10G00786.gene			Ghi_A12G09821.gene		Ghi_A09G05081.gene
Ghi_D13G10121.gene	Ghi_A05G13046.gene	Ghi_A13G10766.gene			Ghi_A12G09826.gene		Ghi_D08G04511.gene
Ghi_A10G13711.gene	Ghi_D02G01836.gene	Ghi_D05G03636.gene			Ghi_A04G06066.gene		Ghi_D05G01621.gene
Ghi_D11G01091.gene	Ghi_D13G09766.gene	Ghi_A03G00816.gene			Ghi_A11G03031.gene		Ghi_A01G07126.gene
Ghi_A03G13496.gene	Ghi_D13G09761.gene	Ghi_D12G03641.gene			Ghi_D06G07536.gene		Ghi_A03G05456.gene
Ghi_A06G01891.gene	Ghi_A13G08391.gene	Ghi_D12G00831.gene			Ghi_D10G00191.gene		Ghi_D12G15176.gene
Ghi_A01G11191.gene	Ghi_A02G01716.gene	Ghi_D12G04396.gene			Ghi_A13G02091.gene		Ghi_D13G02096.gene
Ghi_A06G08626.gene	Ghi_A03G03116.gene	Ghi_D12G15851.gene			Ghi_A09G04481.gene		Ghi_D04G09841.gene
Ghi_A11G02306.gene	Ghi_D12G10621.gene	Ghi_A06G06786.gene			Ghi_A01G07936.gene		Ghi_A05G00676.gene
Ghi_D07G02136.gene	Ghi_A01G05411.gene	Ghi_D01G03521.gene			Ghi_A01G07931.gene		Ghi_A08G08176.gene
Ghi_A01G08536.gene	Ghi_D06G07456.gene	Ghi_D11G14611.gene			Ghi_A03G10331.gene		Ghi_D11G18181.gene
Ghi_D02G12671.gene	Ghi_D06G07451.gene	Ghi_A02G08681.gene			Ghi_A11G04566.gene		Ghi_D13G12341.gene
Ghi_D06G07356.gene	Ghi_A03G04111.gene	Ghi_D12G12111.gene			Ghi_D08G02721.gene		Ghi_D05G07716.gene
Ghi_D01G12081.gene	Ghi_A04G03811.gene	Ghi_A11G18006.gene			Ghi_D01G07321.gene		Ghi_D05G08726.gene
Ghi_A03G06936.gene	Ghi_A11G16201.gene	Ghi_A06G11311.gene			Ghi_D05G10681.gene		Ghi_A01G11266.gene
Ghi_A10G09481.gene	Ghi_D09G07766.gene	Ghi_A07G12291.gene			Ghi_A11G15316.gene		Ghi_D12G04501.gene
Ghi_A01G04191.gene	Ghi_D13G10416.gene	Ghi_D12G08691.gene			Ghi_D01G09436.gene		Ghi_A10G07481.gene
Ghi_D03G05326.gene	Ghi_A12G13341.gene	Ghi_A11G08551.gene			Ghi_D07G07451.gene		Ghi_D04G02466.gene
Ghi_A06G07826.gene	Ghi_D12G15251.gene	Ghi_A08G01111.gene			Ghi_D07G07456.gene		Ghi_A07G10656.gene
GhiUnG02146.gene	Ghi_D04G02126.gene	Ghi_D13G07941.gene			Ghi_D12G07071.gene		Ghi_D12G05676.gene
Ghi_A10G06191.gene	Ghi_D04G00716.gene	Ghi_A02G01131.gene			Ghi_D01G05891.gene		Ghi_D12G05671.gene
Ghi_D12G13506.gene	Ghi_A11G05836.gene	Ghi_A04G06631.gene			Ghi_A05G01666.gene		Ghi_D07G06321.gene
Ghi_D11G06076.gene	Ghi_A12G09561.gene	Ghi_A12G14891.gene			Ghi_A06G03436.gene		Ghi_D13G10471.gene
Ghi_D05G02926.gene	Ghi_A05G14716.gene	Ghi_A12G14896.gene			Ghi_A10G06981.gene		Ghi_A06G02306.gene
Ghi_D07G10881.gene	Ghi_A12G15401.gene	Ghi_A05G11861.gene			Ghi_A09G03686.gene		Ghi_A07G05956.gene
Ghi_A10G09731.gene	Ghi_D10G11701.gene	Ghi_A07G09166.gene			Ghi_A09G08816.gene		Ghi_D09G11361.gene
Ghi_D07G03266.gene	Ghi_A05G19826.gene	Ghi_D07G12661.gene			Ghi_D05G03616.gene		Ghi_A11G00641.gene
Ghi_D01G11786.gene	Ghi_D13G01556.gene	Ghi_A12G04051.gene			Ghi_A09G08811.gene		Ghi_A09G09571.gene
Ghi_A05G24136.gene	Ghi_D12G11031.gene	Ghi_A02G02966.gene			Ghi_A07G01506.gene		Ghi_A03G02536.gene
Ghi_A01G02566.gene	Ghi_D12G11036.gene	Ghi_A02G08341.gene			Ghi_A04G01781.gene		Ghi_A02G06496.gene
Ghi_D06G00766.gene	Ghi_A12G07791.gene	Ghi_D10G00811.gene			Ghi_A04G04576.gene		Ghi_A09G14236.gene
Ghi_D05G00636.gene	Ghi_D08G02816.gene	Ghi_A03G12191.gene			Ghi_A09G12131.gene		Ghi_A09G08966.gene
Ghi_A09G08181.gene	Ghi_D03G09441.gene	Ghi_A03G12196.gene			Ghi_D03G10081.gene		Ghi_A10G13976.gene
Ghi_D01G08701.gene	Ghi_A06G00581.gene	Ghi_D08G14481.gene			Ghi_A09G07761.gene		Ghi_A05G02086.gene
Ghi_D02G03106.gene	Ghi_D03G03216.gene	Ghi_A02G08406.gene			Ghi_A10G04161.gene		Ghi_A01G03826.gene
Ghi_D01G04856.gene	Ghi_A08G01261.gene	Ghi_D07G01541.gene			Ghi_A08G11311.gene		Ghi_A07G12381.gene
Ghi_D05G01321.gene	Ghi_A01G00781.gene	Ghi_A13G01756.gene			Ghi_D08G11781.gene		Ghi_A12G08496.gene
Ghi_A04G04101.gene	Ghi_D10G04796.gene	Ghi_A09G10046.gene			Ghi_A08G08851.gene		Ghi_A09G14541.gene
Ghi_A07G01216.gene	Ghi_A04G07801.gene	Ghi_A12G01321.gene			Ghi_A05G06476.gene		Ghi_D13G04511.gene
Ghi_A07G00166.gene	Ghi_A11G04211.gene	Ghi_A06G02601.gene			Ghi_A05G06471.gene		Ghi_D03G07171.gene
Ghi_D06G00491.gene	Ghi_D04G05566.gene	Ghi_D06G11006.gene			Ghi_A11G07051.gene		Ghi_D11G12181.gene
Ghi_D06G00496.gene	Ghi_D08G14306.gene	Ghi_A09G15106.gene			Ghi_A13G12541.gene		Ghi_A12G13826.gene
Ghi_A09G08236.gene	Ghi_A13G11701.gene	Ghi_A09G13826.gene			Ghi_A02G10136.gene		Ghi_A05G02776.gene
Ghi_D03G04721.gene	Ghi_A10G07701.gene	Ghi_A04G07186.gene			Ghi_A08G14896.gene		Ghi_D01G04226.gene
Ghi_A09G14901.gene	Ghi_A13G06501.gene	Ghi_D05G02021.gene			Ghi_A08G02201.gene		Ghi_A05G23961.gene
Ghi_D09G07286.gene	Ghi_A04G05596.gene	Ghi_D06G04816.gene			Ghi_A07G05121.gene		Ghi_D02G11361.gene
Ghi_A09G00041.gene	Ghi_A13G10071.gene	Ghi_A13G01246.gene			Ghi_D04G05826.gene		Ghi_A02G08716.gene
Ghi_D05G02161.gene	Ghi_D02G12441.gene	Ghi_A07G08326.gene			Ghi_D01G03506.gene		Ghi_A01G10336.gene
Ghi_A01G12506.gene	Ghi_D06G10251.gene	Ghi_D06G00011.gene			Ghi_D12G08951.gene		Ghi_D07G05186.gene
Ghi_A09G00406.gene	Ghi_D12G13336.gene	Ghi_D13G09651.gene			Ghi_A12G00011.gene		Ghi_D05G05876.gene
Ghi_A09G00401.gene	Ghi_A07G01026.gene	Ghi_D11G16236.gene			Ghi_D13G02876.gene		Ghi_D01G02331.gene
Ghi_A09G03171.gene	GhiUnG01886.gene	Ghi_A04G05491.gene			Ghi_A13G04106.gene		Ghi_D12G05186.gene
Ghi_D13G08871.gene	Ghi_A02G03076.gene	Ghi_A10G12506.gene			Ghi_A06G02426.gene		Ghi_A07G12896.gene
Ghi_A13G01011.gene	Ghi_A09G04276.gene	Ghi_D13G13146.gene			Ghi_A13G14051.gene		Ghi_A05G13951.gene
Ghi_A06G09966.gene	Ghi_D05G11596.gene	Ghi_A12G13436.gene			Ghi_A13G14056.gene		Ghi_D07G10856.gene
Ghi_D13G03006.gene	Ghi_A11G00146.gene	Ghi_D12G12701.gene			Ghi_A10G14026.gene		Ghi_D12G10011.gene
Ghi_A02G07146.gene	Ghi_A05G04046.gene	Ghi_D11G02811.gene			Ghi_A11G07881.gene		Ghi_A08G00156.gene
Ghi_D04G05431.gene	Ghi_A07G01511.gene	Ghi_D11G05666.gene			Ghi_A02G02836.gene		Ghi_A08G01201.gene
Ghi_A10G04256.gene	Ghi_D10G10831.gene	Ghi_D03G06201.gene			Ghi_A03G02386.gene		Ghi_A06G06246.gene
Ghi_D12G07026.gene	Ghi_A02G01321.gene	Ghi_A05G03196.gene			Ghi_D04G08516.gene		Ghi_A13G13461.gene
Ghi_A05G01596.gene	Ghi_A05G07296.gene	Ghi_D09G03036.gene			Ghi_A08G14461.gene		Ghi_D06G03316.gene
Ghi_D11G01311.gene	Ghi_A10G12181.gene	Ghi_A03G11541.gene			Ghi_D09G10711.gene		Ghi_D05G11696.gene
Ghi_A01G04466.gene	Ghi_D10G00966.gene	Ghi_A06G09841.gene			Ghi_A07G02866.gene		Ghi_A09G07026.gene
Ghi_D03G08271.gene	Ghi_A12G07616.gene	Ghi_D02G07796.gene			Ghi_A12G02326.gene		Ghi_A04G06446.gene
Ghi_A05G18981.gene	Ghi_D05G12001.gene	Ghi_D02G07246.gene			Ghi_D02G07886.gene		Ghi_D05G01296.gene
Ghi_D13G12601.gene	Ghi_D05G03006.gene	Ghi_D13G01881.gene			Ghi_A03G00476.gene		Ghi_D03G06701.gene
Ghi_D04G00526.gene	Ghi_D05G03001.gene	Ghi_A03G09346.gene			Ghi_D11G03641.gene		Ghi_D07G08881.gene
Ghi_A05G15176.gene	Ghi_D09G04251.gene	Ghi_D13G01886.gene			Ghi_A08G01681.gene		Ghi_A08G04611.gene
Ghi_A13G13671.gene	Ghi_A01G00736.gene	Ghi_D06G04606.gene			Ghi_A12G09776.gene		Ghi_A01G12746.gene
Ghi_A02G00491.gene	Ghi_A09G06926.gene	Ghi_D07G06981.gene			Ghi_A06G08966.gene		Ghi_A01G06976.gene
Ghi_D07G02851.gene	Ghi_D11G14031.gene	Ghi_A09G06806.gene			Ghi_A03G00836.gene		Ghi_D04G03911.gene
Ghi_A04G02421.gene	Ghi_D06G09611.gene	Ghi_D07G06986.gene			Ghi_A03G00831.gene		Ghi_A13G02951.gene
Ghi_A10G01966.gene	Ghi_D06G00771.gene	Ghi_A13G10871.gene			Ghi_D10G12861.gene		Ghi_A11G04186.gene
Ghi_D02G09451.gene	Ghi_D13G02116.gene	Ghi_D05G01276.gene			Ghi_A09G07851.gene		Ghi_A11G04181.gene
Ghi_D13G00611.gene	Ghi_D05G10541.gene	Ghi_A13G11471.gene			Ghi_A07G13671.gene		Ghi_A11G04351.gene
Ghi_A11G05216.gene	Ghi_A01G00886.gene	Ghi_A11G14516.gene			Ghi_A02G02586.gene		Ghi_A10G03436.gene
Ghi_D05G08846.gene	Ghi_D07G02826.gene	Ghi_A02G00806.gene			Ghi_D12G09276.gene		Ghi_A08G02166.gene
Ghi_A13G00866.gene	Ghi_A07G06466.gene	Ghi_A03G11021.gene			Ghi_A12G04076.gene		Ghi_A01G10071.gene
Ghi_D10G11236.gene	Ghi_A05G03526.gene	Ghi_D06G10476.gene			Ghi_D05G13246.gene		Ghi_D11G15421.gene
Ghi_D05G05696.gene	Ghi_D05G14661.gene	Ghi_A13G01456.gene			Ghi_D03G02006.gene		Ghi_D10G05781.gene
Ghi_A09G13376.gene	Ghi_D10G11241.gene	Ghi_D01G01516.gene			Ghi_A07G02106.gene		Ghi_A10G11801.gene
Ghi_A09G06496.gene	Ghi_D08G08901.gene	Ghi_A12G03466.gene			Ghi_A03G12641.gene		Ghi_A07G03736.gene
Ghi_D01G10156.gene	Ghi_D07G11061.gene	Ghi_D02G03021.gene			Ghi_A02G02911.gene		Ghi_A10G00271.gene
Ghi_A12G01721.gene	Ghi_A12G12851.gene	Ghi_A10G11861.gene			Ghi_A03G03711.gene		Ghi_D05G08686.gene
Ghi_A08G12221.gene	Ghi_A05G13746.gene	Ghi_A05G08656.gene			Ghi_D11G04181.gene		Ghi_A10G05386.gene
Ghi_A11G09986.gene	Ghi_D11G14576.gene	Ghi_D02G03791.gene			Ghi_D05G01986.gene		Ghi_A13G01736.gene
Ghi_A11G09981.gene	Ghi_D10G03106.gene	Ghi_D11G01426.gene			Ghi_D06G05326.gene		Ghi_D12G01036.gene
Ghi_A05G11671.gene	Ghi_D11G04276.gene	Ghi_A08G14016.gene			Ghi_D12G11151.gene		Ghi_A05G14846.gene
Ghi_A05G11676.gene	Ghi_A08G14496.gene	Ghi_D13G04116.gene			Ghi_A09G12346.gene		Ghi_D13G04461.gene
Ghi_D12G15951.gene	Ghi_D02G00291.gene	Ghi_A09G10811.gene			Ghi_A13G03501.gene		Ghi_A13G06831.gene
Ghi_D04G02381.gene	Ghi_A01G02006.gene	Ghi_A05G21741.gene			Ghi_A05G20886.gene		Ghi_A06G12666.gene
Ghi_A05G21656.gene	Ghi_A01G02001.gene	Ghi_A11G06976.gene			Ghi_A01G10476.gene		Ghi_A07G01001.gene
Ghi_A12G12846.gene	Ghi_A01G07181.gene	Ghi_D05G04426.gene			Ghi_A12G06696.gene		Ghi_D12G02711.gene
Ghi_A02G02251.gene	Ghi_A07G09421.gene	Ghi_D09G11156.gene			Ghi_A04G05936.gene		Ghi_D05G08041.gene
Ghi_A01G01271.gene	Ghi_A01G08096.gene	Ghi_A02G08931.gene			Ghi_D05G12806.gene		Ghi_D04G02231.gene
Ghi_A05G19401.gene	Ghi_D12G10891.gene	Ghi_A10G08776.gene			Ghi_D09G04476.gene		Ghi_D04G02236.gene
Ghi_D04G01616.gene	Ghi_A10G06736.gene	Ghi_A03G09096.gene			Ghi_D02G12536.gene		Ghi_D03G01416.gene
Ghi_A03G09821.gene	Ghi_D08G10176.gene	Ghi_A04G01456.gene			Ghi_D09G04471.gene		Ghi_A07G00356.gene
Ghi_A11G17021.gene	Ghi_D11G17451.gene	Ghi_D11G18261.gene			Ghi_A07G12991.gene		Ghi_A09G06786.gene
Ghi_A12G07371.gene	Ghi_A06G05591.gene	Ghi_A09G02286.gene			Ghi_A09G15146.gene		Ghi_A05G14016.gene
Ghi_A01G11686.gene	Ghi_A13G12821.gene	Ghi_D11G18191.gene			Ghi_A06G07901.gene		Ghi_D09G09376.gene
Ghi_A12G10996.gene	Ghi_D06G09001.gene	Ghi_A03G12201.gene			Ghi_A11G03171.gene		Ghi_D09G04536.gene
Ghi_A05G04151.gene	Ghi_D12G15701.gene	Ghi_D05G01811.gene			Ghi_D01G06791.gene		Ghi_D07G13121.gene
Ghi_A06G08421.gene	Ghi_D08G10926.gene	Ghi_D01G02741.gene			Ghi_A13G02021.gene		Ghi_D12G09666.gene
Ghi_A05G10206.gene	Ghi_D09G09061.gene	Ghi_D12G14356.gene			Ghi_A03G10101.gene		Ghi_A10G06396.gene
Ghi_A02G00996.gene	Ghi_A09G01611.gene	Ghi_D02G02666.gene			Ghi_A13G09311.gene		Ghi_A08G00311.gene
Ghi_D10G03571.gene	Ghi_A04G05751.gene	Ghi_A03G04006.gene			Ghi_A11G15436.gene		Ghi_A11G06461.gene
Ghi_D11G11741.gene	Ghi_D08G00831.gene	Ghi_D12G12196.gene			Ghi_A06G10121.gene		Ghi_A08G10161.gene
Ghi_D04G03811.gene	Ghi_D08G08366.gene	Ghi_A07G00646.gene			Ghi_A11G15431.gene		Ghi_D12G07671.gene
Ghi_D06G11216.gene	Ghi_D11G13956.gene	Ghi_A04G02236.gene			Ghi_A01G02351.gene		Ghi_A02G08991.gene
Ghi_A06G10551.gene	Ghi_A07G07536.gene	Ghi_A03G01636.gene			Ghi_D08G03486.gene		Ghi_A12G06911.gene
Ghi_D09G04731.gene	Ghi_D04G01566.gene	Ghi_A07G00421.gene			Ghi_D07G00601.gene		Ghi_D06G12051.gene
Ghi_A12G03011.gene	Ghi_A05G11786.gene	Ghi_A12G00586.gene			Ghi_A06G07011.gene		Ghi_A01G04801.gene
Ghi_A12G03016.gene	Ghi_D07G10161.gene	Ghi_D13G00746.gene			Ghi_A06G02621.gene		Ghi_A12G15096.gene
Ghi_A11G07806.gene	Ghi_A12G11121.gene	Ghi_A11G11211.gene			Ghi_A10G03391.gene		Ghi_D09G08831.gene
Ghi_D08G14476.gene	Ghi_A06G08081.gene	Ghi_D12G10621.gene			Ghi_A05G09336.gene		Ghi_D03G06141.gene
Ghi_D08G14471.gene	Ghi_A12G00291.gene	Ghi_A12G09606.gene			Ghi_A05G09331.gene		Ghi_A12G13981.gene
Ghi_A09G03616.gene	Ghi_A05G21366.gene	Ghi_D03G06511.gene			Ghi_A09G13841.gene		Ghi_A12G13986.gene
Ghi_A01G04281.gene	Ghi_A05G18291.gene	Ghi_A12G09601.gene			Ghi_A09G13846.gene		Ghi_A03G01231.gene
Ghi_D05G00391.gene	Ghi_A10G09591.gene	Ghi_D11G06771.gene			Ghi_D05G02046.gene		Ghi_D10G10841.gene
Ghi_A12G14296.gene	Ghi_A09G05656.gene	Ghi_D05G06956.gene			Ghi_D01G01746.gene		Ghi_A13G09886.gene
Ghi_D09G02776.gene	Ghi_A11G14261.gene	Ghi_D07G03841.gene			Ghi_A09G13591.gene		Ghi_A05G21211.gene
Ghi_A11G05101.gene	Ghi_A10G05046.gene	Ghi_D10G05746.gene			Ghi_A01G10866.gene		Ghi_D05G06506.gene
Ghi_A01G04351.gene	Ghi_D06G09746.gene	Ghi_D04G09181.gene			Ghi_A07G00751.gene		Ghi_A11G16566.gene
Ghi_D12G03106.gene	Ghi_A06G04831.gene	Ghi_D01G05316.gene			Ghi_A05G12951.gene		Ghi_D02G01906.gene
Ghi_D02G09991.gene	Ghi_A01G10636.gene	Ghi_A11G00851.gene			Ghi_A05G12956.gene		Ghi_D06G06961.gene
Ghi_A03G02576.gene	Ghi_D05G04161.gene	Ghi_D10G06211.gene			Ghi_A09G00206.gene		Ghi_D07G04286.gene
Ghi_A08G01601.gene	Ghi_D02G08076.gene	Ghi_D08G10686.gene			Ghi_A10G04726.gene		Ghi_A01G02926.gene
Ghi_D10G10966.gene	Ghi_D12G00516.gene	Ghi_A04G05411.gene			Ghi_D06G05391.gene		Ghi_D10G02811.gene
Ghi_A02G09196.gene	Ghi_A10G07916.gene	Ghi_A05G02406.gene			Ghi_A05G08171.gene		Ghi_A03G03211.gene
Ghi_A10G01906.gene	Ghi_A10G01426.gene	Ghi_D03G07536.gene			Ghi_D10G06011.gene		Ghi_A11G11611.gene
Ghi_A11G01481.gene	Ghi_A09G14996.gene	Ghi_A04G03811.gene			Ghi_A12G02126.gene		Ghi_D07G04426.gene
Ghi_A08G13631.gene	Ghi_D05G07376.gene	Ghi_D13G10416.gene			Ghi_A11G06206.gene		Ghi_D07G04421.gene
Ghi_D03G07656.gene	Ghi_A12G03761.gene	Ghi_D06G08931.gene			Ghi_D06G01961.gene		Ghi_D06G05436.gene
Ghi_A11G17611.gene	Ghi_A07G13546.gene	Ghi_D06G09331.gene			Ghi_A01G10131.gene		Ghi_A08G05486.gene
Ghi_D09G03826.gene	Ghi_D12G05871.gene	Ghi_A07G01491.gene			Ghi_D08G10626.gene		Ghi_A11G02351.gene
Ghi_A08G14176.gene	Ghi_A01G01836.gene	Ghi_A12G13341.gene			Ghi_D04G00201.gene		Ghi_A09G05361.gene
Ghi_A01G03361.gene	Ghi_A12G07696.gene	Ghi_A03G07106.gene			Ghi_A11G02966.gene		Ghi_A09G05366.gene
Ghi_D11G06271.gene	Ghi_D08G01356.gene	Ghi_A11G08456.gene			Ghi_A11G09251.gene		Ghi_A04G02311.gene
Ghi_A01G02016.gene	Ghi_D05G10011.gene	Ghi_A13G01861.gene			Ghi_D04G01261.gene		Ghi_D13G02356.gene
Ghi_A01G02011.gene	Ghi_D08G14576.gene	Ghi_A12G09561.gene			Ghi_D05G07521.gene		Ghi_D13G02351.gene
Ghi_A05G22846.gene	Ghi_D03G06606.gene	Ghi_D04G07301.gene			Ghi_A05G06201.gene		Ghi_D06G07581.gene
Ghi_A03G09456.gene	Ghi_D02G01826.gene	Ghi_D13G04536.gene			Ghi_D04G01266.gene		Ghi_A11G03551.gene
Ghi_A07G13761.gene	Ghi_A11G04556.gene	Ghi_A07G09916.gene			Ghi_A03G12091.gene		Ghi_A13G14506.gene
Ghi_A02G01506.gene	Ghi_A04G01796.gene	Ghi_A08G14691.gene			Ghi_D03G00241.gene		Ghi_D12G12686.gene
Ghi_A01G07191.gene	Ghi_D13G02451.gene	Ghi_D10G10256.gene			Ghi_A10G11181.gene		Ghi_A08G11411.gene
Ghi_D03G06306.gene	Ghi_D06G00926.gene	Ghi_A05G22636.gene			Ghi_A05G14391.gene		Ghi_A07G12056.gene
Ghi_A05G03276.gene	Ghi_D12G04671.gene	Ghi_A08G05426.gene			Ghi_A04G02291.gene		Ghi_A02G00691.gene
Ghi_D11G03576.gene	Ghi_D13G13301.gene	Ghi_D03G03216.gene			Ghi_A05G11736.gene		Ghi_A05G15631.gene
Ghi_A07G13941.gene	Ghi_D02G13051.gene	Ghi_A08G04961.gene			Ghi_A05G14926.gene		Ghi_D12G06706.gene
Ghi_A07G13766.gene	Ghi_A07G02871.gene	Ghi_D05G01411.gene			Ghi_D11G12861.gene		Ghi_D01G09481.gene
Ghi_A07G09451.gene	Ghi_A06G02431.gene	Ghi_D06G08611.gene			Ghi_A01G05451.gene		Ghi_A09G06121.gene
Ghi_A04G01541.gene	Ghi_A11G18051.gene	Ghi_D04G09681.gene			Ghi_D03G00081.gene		Ghi_D05G00291.gene
Ghi_A03G05796.gene	Ghi_D02G07891.gene	Ghi_A06G04706.gene			Ghi_D11G08986.gene		Ghi_A05G15706.gene
Ghi_A07G11116.gene	Ghi_A11G08691.gene	Ghi_A11G06106.gene			Ghi_A06G03671.gene		Ghi_A13G04686.gene
Ghi_A02G08691.gene	Ghi_D05G00806.gene	Ghi_D11G15406.gene			Ghi_A09G12851.gene		Ghi_A11G18671.gene
Ghi_D08G06306.gene	Ghi_D12G01456.gene	Ghi_D04G07546.gene			Ghi_D09G01951.gene		Ghi_D12G14891.gene
Ghi_A01G06246.gene	Ghi_A08G10916.gene	Ghi_D04G04521.gene			Ghi_D09G00396.gene		Ghi_A03G00521.gene
Ghi_A01G06241.gene	Ghi_A03G08776.gene	Ghi_A12G03951.gene			Ghi_D09G00391.gene		Ghi_A10G10741.gene
Ghi_D05G14291.gene	Ghi_D07G08726.gene	Ghi_D06G00801.gene			Ghi_D10G12461.gene		Ghi_D05G09121.gene
Ghi_D05G12191.gene	Ghi_D05G02871.gene	Ghi_A05G16426.gene			Ghi_A12G00226.gene		Ghi_A04G02456.gene
Ghi_D06G04281.gene	Ghi_D07G03971.gene	Ghi_A04G06811.gene			Ghi_A05G19291.gene		Ghi_A05G03541.gene
Ghi_D08G01821.gene	Ghi_D06G07221.gene	Ghi_A09G15451.gene			Ghi_D03G04356.gene		Ghi_D10G11266.gene
Ghi_D06G04286.gene	Ghi_D03G07396.gene	Ghi_D13G07286.gene			Ghi_D09G00151.gene		Ghi_A06G12031.gene
Ghi_A11G16646.gene	Ghi_D11G06101.gene	Ghi_A09G10941.gene			Ghi_D09G01046.gene		Ghi_A06G12036.gene
Ghi_D01G05386.gene	Ghi_A05G08926.gene	Ghi_A07G01026.gene			Ghi_D06G11311.gene		Ghi_A07G08416.gene
Ghi_D11G01551.gene	Ghi_D10G00026.gene	Ghi_D09G09396.gene			Ghi_A01G04011.gene		Ghi_A12G12876.gene
Ghi_A10G09416.gene	Ghi_D01G06786.gene	Ghi_A09G04276.gene			Ghi_D10G13411.gene		Ghi_D09G08701.gene
Ghi_A08G07166.gene	Ghi_D01G06781.gene	Ghi_A08G11476.gene			Ghi_D02G03201.gene		Ghi_A09G13051.gene
Ghi_D03G08741.gene	Ghi_A01G11561.gene	Ghi_A06G09226.gene			Ghi_A06G11261.gene		Ghi_D08G03591.gene
Ghi_D05G02571.gene	Ghi_A10G02476.gene	Ghi_A07G01511.gene			Ghi_A08G00456.gene		Ghi_D07G08541.gene
Ghi_D04G06136.gene	Ghi_A02G05016.gene	Ghi_A03G01926.gene			Ghi_D05G11141.gene		Ghi_D07G05711.gene
Ghi_D11G01881.gene	Ghi_D12G01291.gene	Ghi_D12G08276.gene			Ghi_D02G00271.gene		Ghi_A05G19181.gene
Ghi_A09G03836.gene	Ghi_A13G13126.gene	Ghi_A07G03051.gene			Ghi_A08G06851.gene		Ghi_D08G00591.gene
Ghi_D13G13346.gene	Ghi_A07G08576.gene	Ghi_D12G01311.gene			Ghi_D11G09776.gene		Ghi_A13G09461.gene
Ghi_D11G07481.gene	Ghi_A07G01116.gene	Ghi_A06G09806.gene			Ghi_A08G01496.gene		Ghi_A03G08856.gene
Ghi_D08G10141.gene	Ghi_D10G03961.gene	Ghi_A05G07296.gene			Ghi_D01G11206.gene		Ghi_A06G09506.gene
Ghi_D01G01866.gene	Ghi_A05G08446.gene	Ghi_A13G02286.gene			Ghi_A01G07091.gene		Ghi_A10G14586.gene
Ghi_A11G17986.gene	Ghi_A09G15071.gene	Ghi_A06G03906.gene			Ghi_A08G13066.gene		Ghi_A13G04526.gene
Ghi_D07G09331.gene	Ghi_D07G10471.gene	Ghi_D09G07986.gene			Ghi_A12G12261.gene		Ghi_A12G11741.gene
Ghi_D07G09336.gene	Ghi_A05G10156.gene	Ghi_D01G05196.gene			Ghi_D05G13166.gene		Ghi_A12G03041.gene
Ghi_D11G00686.gene	Ghi_A05G10151.gene	Ghi_D04G10211.gene			Ghi_A03G03696.gene		Ghi_D05G08191.gene
Ghi_A12G07031.gene	Ghi_D09G09551.gene	Ghi_A12G07611.gene			Ghi_D08G04911.gene		Ghi_A05G11181.gene
Ghi_D01G12121.gene	Ghi_D09G02606.gene	Ghi_D05G12001.gene			Ghi_A01G01676.gene		Ghi_D02G06121.gene
Ghi_D08G05021.gene	Ghi_D10G09606.gene	Ghi_D06G08251.gene			Ghi_D01G04516.gene		Ghi_A07G08536.gene
Ghi_A02G08156.gene	Ghi_A07G08896.gene	Ghi_D05G03001.gene			Ghi_D13G02626.gene		Ghi_A10G03646.gene
Ghi_A07G11136.gene	Ghi_A12G09356.gene	Ghi_A03G13481.gene			Ghi_D01G03906.gene		Ghi_D08G12861.gene
Ghi_A06G07986.gene	Ghi_D12G08301.gene	Ghi_A09G12356.gene			Ghi_A06G09866.gene		Ghi_D01G11336.gene
Ghi_D02G07581.gene	Ghi_D08G12581.gene	Ghi_A01G11611.gene			Ghi_D13G00836.gene		Ghi_A09G04751.gene
Ghi_D07G06026.gene	Ghi_A12G12606.gene	Ghi_D11G14036.gene			Ghi_D01G05641.gene		Ghi_D02G12661.gene
Ghi_A06G10056.gene	Ghi_D01G01771.gene	Ghi_D07G01026.gene			Ghi_D01G05646.gene		Ghi_A10G02116.gene
Ghi_D13G10951.gene	Ghi_A06G02281.gene	Ghi_D13G02116.gene			Ghi_D01G02911.gene		Ghi_A08G06846.gene
Ghi_D12G14571.gene	Ghi_A06G02286.gene	Ghi_A01G00886.gene			Ghi_A03G03526.gene		Ghi_D06G07911.gene
Ghi_D08G14136.gene	Ghi_A11G18241.gene	Ghi_D12G11926.gene			Ghi_A10G10171.gene		Ghi_D02G10386.gene
Ghi_A11G02516.gene	Ghi_A11G12666.gene	Ghi_A10G00356.gene			Ghi_D11G06811.gene		Ghi_A02G09301.gene
Ghi_D13G01981.gene	Ghi_A13G07956.gene	Ghi_A07G06466.gene			Ghi_A06G01471.gene		Ghi_D05G07216.gene
Ghi_A13G07871.gene	Ghi_D09G05681.gene	Ghi_A08G15146.gene			Ghi_A06G01801.gene		Ghi_A09G10651.gene
Ghi_D01G03161.gene	Ghi_A12G03451.gene	Ghi_D05G09106.gene			Ghi_D10G07591.gene		Ghi_D11G10621.gene
Ghi_A11G16166.gene	Ghi_D11G01416.gene	Ghi_A13G02706.gene			Ghi_A09G00766.gene		Ghi_A03G04761.gene
Ghi_A11G16161.gene	Ghi_D12G01646.gene	Ghi_D08G08901.gene			Ghi_A03G10601.gene		Ghi_A05G08206.gene
Ghi_A11G04916.gene	Ghi_D09G05821.gene	Ghi_D03G02356.gene			Ghi_A01G04751.gene		Ghi_A05G08201.gene
Ghi_D06G09031.gene	Ghi_D08G09876.gene	Ghi_A05G15966.gene			Ghi_A09G07526.gene		Ghi_D05G02541.gene
Ghi_A02G03491.gene	Ghi_A05G02326.gene	Ghi_D02G07321.gene			Ghi_A11G04816.gene		Ghi_D05G02546.gene
Ghi_D13G10481.gene	Ghi_A09G12546.gene	Ghi_D11G04276.gene			Ghi_A05G18246.gene		Ghi_D01G08976.gene
Ghi_A01G03001.gene	Ghi_D04G08231.gene	Ghi_D02G07816.gene			Ghi_A02G08886.gene		Ghi_A06G04956.gene
Ghi_D07G07371.gene	Ghi_D06G00136.gene	Ghi_D08G09266.gene			Ghi_D08G04121.gene		Ghi_D06G03701.gene
Ghi_D01G03291.gene	Ghi_D09G03281.gene	Ghi_A01G04361.gene			Ghi_A06G07736.gene		Ghi_A01G10756.gene
Ghi_A04G06386.gene	Ghi_D09G00956.gene	Ghi_D11G09551.gene			Ghi_D12G02211.gene		Ghi_D08G07841.gene
Ghi_A13G14291.gene	Ghi_D10G10576.gene	Ghi_D11G04271.gene			Ghi_A13G13236.gene		Ghi_D13G01736.gene
Ghi_D01G03836.gene	Ghi_D10G10511.gene	Ghi_D10G10976.gene			Ghi_A11G03456.gene		Ghi_A11G16156.gene
Ghi_D06G00516.gene	Ghi_A12G03341.gene	Ghi_A08G14496.gene			Ghi_A04G02946.gene		Ghi_A10G07371.gene
Ghi_D01G03831.gene	Ghi_D03G05486.gene	Ghi_D09G02181.gene			Ghi_D04G09666.gene		Ghi_A03G09936.gene
Ghi_D11G11921.gene	Ghi_D02G01071.gene	Ghi_D03G07641.gene			Ghi_A07G00096.gene		Ghi_A11G13651.gene
Ghi_D01G08111.gene	Ghi_D05G13546.gene	Ghi_D02G00291.gene			Ghi_A05G04506.gene		Ghi_A01G01911.gene
Ghi_D07G00686.gene	Ghi_A13G10711.gene	Ghi_D08G13671.gene			Ghi_A05G01756.gene		Ghi_A11G13656.gene
Ghi_A09G01961.gene	Ghi_A03G12496.gene	Ghi_A07G09421.gene			Ghi_A05G09101.gene		Ghi_A06G02071.gene
Ghi_D13G02366.gene	Ghi_A09G05931.gene	Ghi_D08G04791.gene			Ghi_A02G06301.gene		Ghi_A07G01551.gene
Ghi_A02G00906.gene	Ghi_A09G05936.gene	Ghi_D10G01866.gene			Ghi_A01G04341.gene		Ghi_A08G13316.gene
Ghi_A05G00891.gene	Ghi_D02G01386.gene	Ghi_D10G01861.gene			Ghi_A05G03216.gene		Ghi_D10G09416.gene
Ghi_A05G00896.gene	Ghi_D05G08501.gene	Ghi_A08G13166.gene			Ghi_A09G06006.gene		Ghi_D06G10791.gene
Ghi_D12G15716.gene	Ghi_D06G07396.gene	Ghi_D06G03761.gene			Ghi_A10G11881.gene		Ghi_D04G00031.gene
Ghi_D12G15711.gene	Ghi_D05G04336.gene	Ghi_A01G10771.gene			Ghi_D13G08456.gene		Ghi_D11G13621.gene
Ghi_A09G13516.gene	Ghi_D10G03586.gene	Ghi_D12G15046.gene			Ghi_A10G05036.gene		Ghi_A04G06356.gene
Ghi_D12G16061.gene	Ghi_D06G01496.gene	Ghi_A07G01411.gene			Ghi_A05G14356.gene		Ghi_A09G01936.gene
Ghi_A12G03256.gene	Ghi_D08G01366.gene	Ghi_D12G15701.gene			Ghi_A05G14351.gene		Ghi_A02G05941.gene
Ghi_A09G14891.gene	Ghi_D03G04531.gene	Ghi_A13G14751.gene			Ghi_A05G22436.gene		Ghi_A11G05541.gene
Ghi_D08G13356.gene	Ghi_A11G18121.gene	Ghi_A12G03261.gene			Ghi_D06G11261.gene		Ghi_A09G03576.gene
Ghi_D01G11441.gene	Ghi_A11G08616.gene	Ghi_D11G15131.gene			Ghi_A02G05546.gene		Ghi_D11G15111.gene
Ghi_A09G06726.gene	Ghi_A05G15306.gene	Ghi_A09G10146.gene			Ghi_A08G12521.gene		Ghi_A05G00536.gene
Ghi_D11G17376.gene	Ghi_A11G06506.gene	Ghi_D04G07071.gene			Ghi_A05G14681.gene		Ghi_A12G10181.gene
Ghi_D10G06726.gene	Ghi_D01G04786.gene	Ghi_D09G09061.gene			Ghi_A12G14281.gene		Ghi_D12G04916.gene
Ghi_D13G10101.gene	Ghi_A05G12651.gene	Ghi_D05G07236.gene			Ghi_D10G07556.gene		Ghi_A11G09691.gene
Ghi_A11G06421.gene	Ghi_A13G06101.gene	Ghi_D13G11266.gene			Ghi_A03G00406.gene		Ghi_A12G08271.gene
Ghi_A11G01431.gene	Ghi_D03G06821.gene	Ghi_D07G11296.gene			Ghi_A12G00406.gene		Ghi_D05G08446.gene
Ghi_D11G10331.gene	Ghi_D02G01541.gene	Ghi_D04G01566.gene			Ghi_A07G13026.gene		GhiUnG02091.gene
Ghi_A04G05296.gene	Ghi_D12G05936.gene	Ghi_A07G04361.gene			Ghi_A07G13021.gene		Ghi_A12G15466.gene
Ghi_A04G05291.gene	Ghi_A03G12791.gene	Ghi_A12G11121.gene			Ghi_A05G16266.gene		Ghi_A12G15461.gene
Ghi_D09G04641.gene	Ghi_A03G00201.gene	Ghi_A06G00676.gene			Ghi_D05G09001.gene		Ghi_A02G09396.gene
Ghi_D03G00821.gene	Ghi_D04G00616.gene	Ghi_A07G06326.gene			Ghi_D02G04301.gene		Ghi_D02G10311.gene
Ghi_D03G00826.gene	Ghi_D09G01896.gene	Ghi_A02G01091.gene			Ghi_A02G06896.gene		Ghi_A09G11781.gene
Ghi_A05G06826.gene	Ghi_D01G02556.gene	Ghi_D08G08761.gene			Ghi_D11G12121.gene		Ghi_D06G12326.gene
Ghi_D12G03991.gene	Ghi_A06G10331.gene	Ghi_D11G02536.gene			Ghi_A05G10696.gene		Ghi_A07G05521.gene
Ghi_A10G06446.gene	Ghi_A06G01036.gene	Ghi_D10G04171.gene			Ghi_D01G10796.gene		Ghi_A07G04696.gene
Ghi_D13G04036.gene	Ghi_D02G09021.gene	Ghi_D02G11556.gene			Ghi_A13G06526.gene		Ghi_A05G17156.gene
Ghi_A05G16301.gene	Ghi_A10G08081.gene	Ghi_A04G05511.gene			Ghi_A09G10576.gene		Ghi_D05G11606.gene
Ghi_A04G05741.gene	Ghi_D10G04371.gene	Ghi_D11G10921.gene			Ghi_D02G11701.gene		Ghi_A12G12116.gene
Ghi_A04G05746.gene	Ghi_D11G02401.gene	Ghi_A06G00336.gene			Ghi_A09G10571.gene		Ghi_D01G10376.gene
Ghi_A05G16306.gene	Ghi_D08G07346.gene	Ghi_D12G04406.gene			Ghi_A05G12026.gene		Ghi_D02G03956.gene
Ghi_A10G11451.gene	Ghi_D05G10801.gene	Ghi_A06G06471.gene			Ghi_A07G14081.gene		Ghi_A07G00846.gene
Ghi_A13G12196.gene	Ghi_A04G01856.gene	Ghi_D05G04161.gene			Ghi_A11G10026.gene		Ghi_A06G00651.gene
Ghi_A13G12191.gene	Ghi_D01G05341.gene	Ghi_D13G06096.gene			Ghi_A05G19311.gene		Ghi_D01G02446.gene
Ghi_A12G09581.gene	Ghi_D06G00066.gene	Ghi_A04G03001.gene			Ghi_A09G13131.gene		Ghi_A03G11731.gene
Ghi_D12G09346.gene	Ghi_D11G11491.gene	Ghi_A07G04166.gene			Ghi_A07G00931.gene		Ghi_A01G00726.gene
Ghi_A08G14376.gene	Ghi_D13G12371.gene	Ghi_D12G09976.gene			Ghi_D03G02781.gene		Ghi_A03G01521.gene
Ghi_A01G11841.gene	Ghi_D05G05766.gene	Ghi_A11G18796.gene			Ghi_A07G00936.gene		Ghi_A07G14271.gene
Ghi_A12G08116.gene	Ghi_A02G01176.gene	Ghi_A05G04626.gene			Ghi_D03G03436.gene		Ghi_D01G11811.gene
Ghi_D07G04216.gene	Ghi_A11G01861.gene	Ghi_D12G00516.gene			Ghi_A09G10466.gene		Ghi_A11G15151.gene
Ghi_A05G02256.gene	Ghi_A09G10471.gene	Ghi_D05G07376.gene			Ghi_A05G13646.gene		Ghi_A07G00296.gene
Ghi_A07G02691.gene	Ghi_D06G02331.gene	Ghi_D07G12396.gene			Ghi_A03G04891.gene		Ghi_A10G09151.gene
Ghi_A01G12561.gene	Ghi_A11G16251.gene	Ghi_D13G12231.gene			Ghi_D09G08021.gene		Ghi_A05G18896.gene
Ghi_D05G08496.gene	Ghi_A12G13371.gene	Ghi_D06G11716.gene			Ghi_A05G19116.gene		Ghi_D01G07876.gene
Ghi_A13G13821.gene	Ghi_D06G08651.gene	Ghi_D08G09561.gene			GhiUnG01536.gene		Ghi_D10G05401.gene
Ghi_A08G13941.gene	Ghi_D05G02291.gene	Ghi_D05G14031.gene			Ghi_A12G10571.gene		Ghi_D05G03181.gene
Ghi_A07G14216.gene	Ghi_A03G07151.gene	Ghi_A08G12491.gene			Ghi_A04G07551.gene		Ghi_A10G02306.gene
Ghi_A05G16856.gene	Ghi_D11G09451.gene	Ghi_D09G06366.gene			Ghi_D03G01491.gene		Ghi_A08G03611.gene
Ghi_A08G14991.gene	Ghi_D02G03431.gene	Ghi_D10G11621.gene			Ghi_D11G08201.gene		Ghi_A08G04046.gene
Ghi_A05G03706.gene	Ghi_D11G03111.gene	Ghi_A07G14016.gene			Ghi_D12G08531.gene		Ghi_A10G05076.gene
Ghi_A02G00131.gene	Ghi_A02G06716.gene	Ghi_A01G01836.gene			Ghi_A01G07751.gene		Ghi_A04G01056.gene
Ghi_A03G01546.gene	Ghi_A07G03126.gene	Ghi_A05G22771.gene			Ghi_A01G07756.gene		Ghi_A05G13196.gene
Ghi_D03G01676.gene	Ghi_A05G23041.gene	Ghi_A05G11576.gene			Ghi_A09G09921.gene		Ghi_A09G13176.gene
Ghi_A11G05221.gene	Ghi_D05G14326.gene	Ghi_D01G02216.gene			Ghi_A08G14986.gene		Ghi_A09G13171.gene
Ghi_D01G10691.gene	Ghi_D05G14321.gene	Ghi_A11G15371.gene			Ghi_A02G02291.gene		Ghi_A09G03141.gene
Ghi_D01G10696.gene	Ghi_D03G07106.gene	Ghi_A08G04266.gene			Ghi_A12G14056.gene		Ghi_D13G01501.gene
Ghi_A11G15376.gene	Ghi_D04G08551.gene	Ghi_A02G03851.gene			Ghi_A12G14051.gene		Ghi_A05G12531.gene
Ghi_D03G07561.gene	Ghi_D07G08641.gene	Ghi_D06G04766.gene			Ghi_A06G10421.gene		Ghi_A05G12536.gene
Ghi_D01G04161.gene	Ghi_D07G10731.gene	Ghi_D07G11301.gene			Ghi_A08G15021.gene		Ghi_A10G04306.gene
Ghi_A05G22536.gene	Ghi_A10G13161.gene	Ghi_D08G07076.gene			Ghi_D09G04821.gene		Ghi_D13G00451.gene
Ghi_D07G04501.gene	Ghi_A08G15196.gene	Ghi_D10G09001.gene			Ghi_A01G03166.gene		Ghi_A10G03821.gene
Ghi_A09G06196.gene	Ghi_A11G10781.gene	Ghi_A10G01626.gene			Ghi_A08G10216.gene		Ghi_D06G07076.gene
Ghi_D04G01811.gene	Ghi_D02G06896.gene	Ghi_D13G09011.gene			Ghi_D10G01531.gene		Ghi_D11G12741.gene
Ghi_D07G10486.gene	Ghi_D06G01796.gene	Ghi_D13G01226.gene			Ghi_D03G05491.gene		Ghi_D12G05441.gene
Ghi_A09G10636.gene	Ghi_A01G11581.gene	Ghi_D02G12091.gene			Ghi_D11G09631.gene		Ghi_D04G01381.gene
Ghi_D12G05026.gene	Ghi_A05G20601.gene	Ghi_D06G00926.gene			Ghi_A07G13346.gene		Ghi_A07G01081.gene
Ghi_A03G08256.gene	Ghi_D07G03101.gene	Ghi_A12G07201.gene			Ghi_A05G23481.gene		Ghi_A06G02221.gene
Ghi_A05G16956.gene	Ghi_A11G16496.gene	Ghi_D04G03436.gene			Ghi_A08G05871.gene		Ghi_D12G13391.gene
Ghi_D10G10446.gene	Ghi_A03G11926.gene	Ghi_A13G10981.gene			Ghi_A08G14771.gene		GhiUnG01821.gene
Ghi_A03G13301.gene	Ghi_A05G09241.gene	Ghi_D01G06146.gene			Ghi_D11G02981.gene		Ghi_D06G09216.gene
Ghi_A07G04396.gene	Ghi_D12G02981.gene	Ghi_D02G13051.gene			Ghi_D02G01816.gene		Ghi_A11G09526.gene
Ghi_A07G00871.gene	Ghi_D06G10421.gene	Ghi_D04G00801.gene			Ghi_D05G01051.gene		Ghi_D07G07151.gene
Ghi_A08G03901.gene	Ghi_D04G04486.gene	Ghi_D12G02631.gene			Ghi_A04G07731.gene		Ghi_D06G11056.gene
Ghi_A10G13936.gene	Ghi_D06G01276.gene	Ghi_D13G10521.gene			Ghi_A06G04251.gene		Ghi_D04G06756.gene
Ghi_A07G08371.gene	Ghi_D11G01496.gene	Ghi_A11G18051.gene			Ghi_A08G02091.gene		Ghi_D12G15576.gene
Ghi_D01G02411.gene	Ghi_D05G08031.gene	Ghi_D13G12801.gene			Ghi_D02G01091.gene		Ghi_A09G09436.gene
Ghi_A02G02176.gene	Ghi_A04G05361.gene	Ghi_D03G02841.gene			Ghi_A04G07086.gene		Ghi_D09G10556.gene
Ghi_A03G08926.gene	Ghi_A10G11831.gene	Ghi_A12G10271.gene			Ghi_D05G01576.gene		Ghi_D09G08216.gene
Ghi_D05G11131.gene	Ghi_A13G13771.gene	Ghi_A03G00821.gene			Ghi_D11G10071.gene		Ghi_A12G06996.gene
Ghi_D11G00911.gene	Ghi_D12G01026.gene	Ghi_A11G04396.gene			Ghi_A08G04716.gene		Ghi_A08G06601.gene
Ghi_A07G03716.gene	Ghi_A07G02091.gene	Ghi_D12G01456.gene			Ghi_A11G10346.gene		Ghi_A05G04601.gene
Ghi_A06G03416.gene	Ghi_A05G02506.gene	Ghi_D12G01451.gene			Ghi_D01G04721.gene		Ghi_A05G07556.gene
Ghi_A10G11096.gene	Ghi_A08G12146.gene	Ghi_A10G10891.gene			Ghi_D05G02771.gene		Ghi_A10G01406.gene
Ghi_D10G08771.gene	GhiUnG00256.gene	Ghi_A05G23161.gene			Ghi_A09G04971.gene		Ghi_D11G08581.gene
Ghi_A07G12176.gene	Ghi_A12G14686.gene	Ghi_A03G08776.gene			Ghi_D11G00591.gene		Ghi_A09G14426.gene
Ghi_A08G00766.gene	Ghi_A01G03116.gene	Ghi_D10G00841.gene			Ghi_A03G12221.gene		Ghi_D01G08781.gene
Ghi_A06G03411.gene	Ghi_A04G01426.gene	Ghi_A09G04246.gene			Ghi_A10G00561.gene		Ghi_D06G11886.gene
Ghi_A05G20021.gene	Ghi_A04G01421.gene	Ghi_D12G10811.gene			Ghi_D10G02011.gene		Ghi_A07G09291.gene
Ghi_A05G20026.gene	Ghi_A01G02936.gene	Ghi_D12G10816.gene			Ghi_D04G02726.gene		Ghi_D02G04006.gene
Ghi_A02G00891.gene	Ghi_A01G02931.gene	Ghi_D06G07221.gene			Ghi_D05G09646.gene		Ghi_A05G10641.gene
Ghi_A12G14481.gene	Ghi_A03G03411.gene	Ghi_A04G03696.gene			Ghi_A10G01861.gene		Ghi_D05G13911.gene
Ghi_D05G00446.gene	Ghi_D05G02986.gene	Ghi_D06G06571.gene			Ghi_A05G17001.gene		Ghi_A05G05566.gene
Ghi_D08G09006.gene	Ghi_D09G07036.gene	Ghi_D09G05716.gene			Ghi_D01G09986.gene		Ghi_D04G01556.gene
Ghi_D11G06406.gene	Ghi_A05G09851.gene	Ghi_D10G13326.gene			Ghi_D06G00186.gene		Ghi_D10G13156.gene
Ghi_A07G13221.gene	Ghi_A02G08511.gene	Ghi_A04G07201.gene			Ghi_D10G07526.gene		Ghi_D07G08356.gene
Ghi_D08G08756.gene	Ghi_D10G01476.gene	Ghi_A08G02611.gene			Ghi_D05G04961.gene		Ghi_A06G06691.gene
Ghi_D05G06841.gene	Ghi_A04G02306.gene	Ghi_A05G15116.gene			Ghi_D01G09671.gene		Ghi_A01G11146.gene
Ghi_A10G03151.gene	Ghi_D07G07491.gene	Ghi_D12G13421.gene			Ghi_A11G02601.gene		Ghi_A06G01316.gene
Ghi_A09G05641.gene	Ghi_D13G09296.gene	Ghi_A08G10286.gene			Ghi_A09G11336.gene		Ghi_D10G00256.gene
Ghi_A11G11821.gene	Ghi_A07G07961.gene	Ghi_A05G11281.gene			Ghi_A09G03466.gene		Ghi_D01G06401.gene
Ghi_A11G14241.gene	Ghi_D01G09161.gene	Ghi_D02G03216.gene			Ghi_A05G08866.gene		Ghi_D06G06456.gene
Ghi_D04G10611.gene	Ghi_D12G04006.gene	Ghi_A01G03256.gene			Ghi_D01G00056.gene		Ghi_A06G07251.gene
Ghi_A02G00896.gene	Ghi_D04G00691.gene	Ghi_D02G10286.gene			Ghi_A07G01531.gene		Ghi_A13G05596.gene
Ghi_A12G15281.gene	Ghi_D05G04071.gene	Ghi_D08G12581.gene			Ghi_D02G09166.gene		Ghi_A06G11296.gene
Ghi_A08G02261.gene	Ghi_A02G01741.gene	Ghi_A09G13721.gene			Ghi_A11G01591.gene		Ghi_D12G12606.gene
Ghi_D08G00181.gene	Ghi_D11G09026.gene	Ghi_D07G00896.gene			Ghi_D12G15401.gene		Ghi_D07G04956.gene
Ghi_D05G03401.gene	Ghi_A02G07961.gene	Ghi_A11G10256.gene			Ghi_D06G02881.gene		Ghi_A06G02756.gene
Ghi_D05G03406.gene	Ghi_A12G02861.gene	Ghi_A13G04211.gene			Ghi_A05G01381.gene		Ghi_D06G08501.gene
Ghi_D11G05176.gene	Ghi_D04G10736.gene	Ghi_A10G08781.gene			Ghi_A09G11931.gene		Ghi_A01G02516.gene
Ghi_D11G05171.gene	Ghi_A13G09361.gene	Ghi_A12G07761.gene			Ghi_D01G08206.gene		Ghi_A04G00936.gene
Ghi_A06G11501.gene	Ghi_A08G00516.gene	Ghi_A07G11661.gene			Ghi_D02G11221.gene		Ghi_A06G04756.gene
Ghi_D02G10236.gene	Ghi_D07G02331.gene	Ghi_D10G03276.gene			Ghi_A07G00666.gene		Ghi_D07G07426.gene
Ghi_A06G11401.gene	Ghi_A06G10511.gene	Ghi_D01G06596.gene			Ghi_A07G00661.gene		Ghi_A01G10951.gene
Ghi_D05G10926.gene	Ghi_A13G10986.gene	Ghi_A06G02281.gene			Ghi_A13G00981.gene		Ghi_D05G13076.gene
Ghi_D08G03526.gene	Ghi_A08G02346.gene	Ghi_A06G02286.gene			Ghi_A02G00616.gene		Ghi_D12G06966.gene
Ghi_D02G01446.gene	Ghi_A04G07171.gene	Ghi_D13G00256.gene			Ghi_A10G05526.gene		Ghi_A07G13051.gene
Ghi_D04G04116.gene	Ghi_D05G13286.gene	Ghi_A11G12666.gene			Ghi_D12G06786.gene		Ghi_D05G10981.gene
Ghi_D08G04991.gene	Ghi_A04G01581.gene	Ghi_D10G00616.gene			Ghi_D05G03791.gene		Ghi_D11G18141.gene
Ghi_D06G04361.gene	Ghi_D09G00806.gene	Ghi_A09G08531.gene			Ghi_A07G04861.gene		Ghi_D06G00276.gene
Ghi_A09G02456.gene	Ghi_A01G09851.gene	Ghi_D12G15591.gene			Ghi_D09G05971.gene		Ghi_D05G12301.gene
Ghi_A03G13656.gene	Ghi_D06G10836.gene	Ghi_A04G01626.gene			Ghi_A02G00776.gene		Ghi_A08G09131.gene
Ghi_D07G00801.gene	Ghi_D12G02976.gene	Ghi_A12G03451.gene			Ghi_A07G03366.gene		Ghi_D07G02881.gene
Ghi_D03G09181.gene	Ghi_D12G00781.gene	Ghi_D11G10241.gene			Ghi_A11G06511.gene		Ghi_D12G12981.gene
Ghi_D05G07406.gene	Ghi_A09G01921.gene	Ghi_D11G01416.gene			Ghi_A13G06116.gene		Ghi_A02G09311.gene
Ghi_D11G04516.gene	Ghi_A01G08101.gene	Ghi_D12G01646.gene			Ghi_D02G09651.gene		Ghi_D13G13176.gene
Ghi_A04G08156.gene	Ghi_D09G10441.gene	Ghi_D04G02766.gene			Ghi_A05G03816.gene		Ghi_A06G03866.gene
Ghi_D07G04361.gene	Ghi_D13G07811.gene	Ghi_D13G01641.gene			Ghi_D04G06286.gene		Ghi_A09G14196.gene
Ghi_A02G00991.gene	Ghi_A07G03211.gene	Ghi_D01G11051.gene			Ghi_A03G00216.gene		Ghi_D13G00551.gene
Ghi_A01G05456.gene	Ghi_D04G03566.gene	Ghi_A06G12836.gene			Ghi_D03G01976.gene		Ghi_A07G05171.gene
Ghi_A06G00301.gene	Ghi_D09G11471.gene	Ghi_D04G00401.gene			Ghi_A03G13316.gene		Ghi_A12G10596.gene
Ghi_D07G09941.gene	Ghi_D10G12911.gene	Ghi_A09G12546.gene			Ghi_A03G02776.gene		Ghi_A12G03351.gene
Ghi_A06G00306.gene	Ghi_A03G09126.gene	Ghi_D06G00136.gene			Ghi_A05G17761.gene		Ghi_D09G08476.gene
Ghi_A05G01896.gene	Ghi_D09G03596.gene	Ghi_D05G05811.gene			Ghi_A01G01841.gene		Ghi_D02G09046.gene
Ghi_A13G11756.gene	Ghi_D07G10221.gene	Ghi_A07G12631.gene			Ghi_D06G09841.gene		Ghi_A04G07931.gene
Ghi_A04G06886.gene	Ghi_A05G23651.gene	Ghi_A09G03871.gene			Ghi_D11G12371.gene		Ghi_D11G12956.gene
Ghi_A13G01981.gene	Ghi_D03G09021.gene	Ghi_A06G00136.gene			Ghi_A07G05606.gene		Ghi_D03G04591.gene
Ghi_A01G10621.gene	Ghi_A09G05606.gene	Ghi_D10G10511.gene			Ghi_A02G03361.gene		Ghi_A09G11471.gene
Ghi_D05G04176.gene	Ghi_D08G06796.gene	Ghi_D07G08186.gene			Ghi_A13G01566.gene		Ghi_D02G04426.gene
Ghi_D05G08656.gene	Ghi_D07G10226.gene	Ghi_A06G09411.gene			Ghi_A08G08811.gene		Ghi_A07G10846.gene
Ghi_A01G09276.gene	Ghi_A09G12641.gene	Ghi_A08G15031.gene			Ghi_D01G05036.gene		Ghi_A09G00026.gene
Ghi_A04G05506.gene	Ghi_A11G02821.gene	Ghi_A01G00426.gene			Ghi_D01G02561.gene		Ghi_A13G01021.gene
Ghi_D08G11666.gene	Ghi_D09G00736.gene	Ghi_A08G05151.gene			Ghi_A05G19106.gene		Ghi_A08G00216.gene
Ghi_D06G07046.gene	Ghi_D06G09221.gene	Ghi_D03G06686.gene			Ghi_A01G01156.gene		Ghi_A11G05566.gene
Ghi_A02G10076.gene	Ghi_D13G06181.gene	Ghi_A06G07546.gene			Ghi_A05G11351.gene		Ghi_A07G12201.gene
Ghi_A09G01376.gene	Ghi_A03G07051.gene	Ghi_A09G01411.gene			Ghi_D03G00171.gene		Ghi_A03G05906.gene
Ghi_D11G06896.gene	Ghi_A10G10326.gene	Ghi_A01G11491.gene			Ghi_A03G02841.gene		Ghi_A11G08506.gene
Ghi_D03G05096.gene	Ghi_A03G10161.gene	Ghi_A10G08721.gene			Ghi_A12G03921.gene		Ghi_A11G08501.gene
Ghi_D13G01536.gene	Ghi_A06G10941.gene	Ghi_A02G01081.gene			Ghi_A06G09631.gene		Ghi_A02G07191.gene
Ghi_A01G05601.gene	Ghi_A09G10096.gene	Ghi_D11G12881.gene			Ghi_A06G09636.gene		Ghi_D03G03801.gene
Ghi_A04G06266.gene	Ghi_A12G09471.gene	Ghi_D05G01596.gene			Ghi_D05G15051.gene		Ghi_D07G02926.gene
Ghi_A04G06261.gene	Ghi_A07G11721.gene	Ghi_A05G09776.gene			Ghi_A01G05431.gene		Ghi_A03G11321.gene
Ghi_D02G09196.gene	Ghi_A05G23856.gene	Ghi_D11G05331.gene			Ghi_A06G11986.gene		Ghi_A01G03911.gene
Ghi_A08G02961.gene	Ghi_D13G06186.gene	Ghi_D03G08826.gene			Ghi_D07G02071.gene		Ghi_D06G11961.gene
Ghi_A11G02481.gene	Ghi_A01G05356.gene	Ghi_D07G03541.gene			Ghi_A01G00606.gene		Ghi_A07G08286.gene
Ghi_D12G12346.gene	Ghi_A03G10376.gene	Ghi_A10G00571.gene			Ghi_D06G07471.gene		Ghi_D11G04796.gene
Ghi_A02G03401.gene	Ghi_A05G23746.gene	Ghi_D06G07396.gene			Ghi_D09G00831.gene		Ghi_D11G09236.gene
Ghi_D02G06716.gene	Ghi_D06G08791.gene	Ghi_D13G01401.gene			Ghi_D09G05786.gene		Ghi_D12G02651.gene
Ghi_A03G02231.gene	Ghi_D07G12886.gene	Ghi_D06G01496.gene			Ghi_A01G07871.gene		Ghi_A11G11551.gene
Ghi_D04G01376.gene	Ghi_D05G00671.gene	Ghi_A02G08596.gene			Ghi_A11G16741.gene		Ghi_D09G05941.gene
Ghi_A02G04921.gene	Ghi_A05G13536.gene	Ghi_D08G01366.gene			Ghi_A11G16746.gene		Ghi_D12G03111.gene
Ghi_A08G02966.gene	Ghi_D03G06631.gene	Ghi_A12G13236.gene			Ghi_A10G08091.gene		GhiUnG01136.gene
Ghi_D09G09651.gene	Ghi_D12G12636.gene	Ghi_D13G13286.gene			Ghi_D05G02951.gene		Ghi_D01G04686.gene
Ghi_A11G04766.gene	Ghi_D08G02126.gene	Ghi_A11G08616.gene			Ghi_A05G23721.gene		GhiUnG00666.gene
Ghi_D12G02296.gene	Ghi_D01G01661.gene	Ghi_A12G14516.gene			Ghi_D01G03741.gene		Ghi_D07G04746.gene
Ghi_D02G08241.gene	Ghi_A13G10031.gene	Ghi_A05G12651.gene			Ghi_D09G02256.gene		Ghi_D01G02686.gene
Ghi_A09G00131.gene	Ghi_D07G01811.gene	Ghi_D06G11451.gene			Ghi_D02G12556.gene		Ghi_D05G02386.gene
Ghi_D11G05816.gene	Ghi_D05G03656.gene	Ghi_A02G05746.gene			Ghi_A13G01251.gene		Ghi_A06G08151.gene
Ghi_D11G05811.gene	Ghi_A12G05556.gene	Ghi_D03G02096.gene			Ghi_D08G07356.gene		Ghi_A03G13231.gene
Ghi_D12G09961.gene	Ghi_D04G00566.gene	Ghi_A12G00606.gene			Ghi_D05G10811.gene		Ghi_A07G11166.gene
Ghi_A07G01671.gene	Ghi_D09G08446.gene	Ghi_D10G11546.gene			Ghi_A05G22896.gene		Ghi_D10G06856.gene
Ghi_A08G09121.gene	Ghi_D12G13221.gene	Ghi_A05G17771.gene			Ghi_A09G10521.gene		Ghi_A11G02251.gene
Ghi_A12G13566.gene	Ghi_A05G05391.gene	Ghi_A07G04566.gene			Ghi_D02G08861.gene		Ghi_A06G10021.gene
Ghi_A12G10031.gene	Ghi_D09G01231.gene	Ghi_A07G04561.gene			Ghi_D13G02091.gene		Ghi_D10G10176.gene
Ghi_A08G11041.gene	Ghi_A13G00946.gene	Ghi_A06G10331.gene			Ghi_D02G10301.gene		Ghi_D11G07381.gene
Ghi_D11G03481.gene	Ghi_A09G12561.gene	Ghi_D05G00716.gene			Ghi_D02G10306.gene		Ghi_A01G11481.gene
Ghi_D12G11336.gene	Ghi_D08G05716.gene	Ghi_D10G04956.gene			Ghi_D11G18031.gene		Ghi_A12G15606.gene
Ghi_D07G05951.gene	Ghi_D11G13491.gene	Ghi_A01G12531.gene			Ghi_D11G18036.gene		Ghi_D12G05106.gene
Ghi_A09G11876.gene	Ghi_A07G12546.gene	Ghi_A10G08551.gene			Ghi_D08G05261.gene		Ghi_D08G04096.gene
Ghi_A09G11871.gene	Ghi_D06G12241.gene	Ghi_D10G04371.gene			Ghi_A08G09226.gene		Ghi_D01G08656.gene
Ghi_A11G08091.gene	Ghi_D05G13206.gene	Ghi_D01G00221.gene			Ghi_A04G01241.gene		Ghi_D13G11131.gene
Ghi_A09G07351.gene	Ghi_D06G05356.gene	Ghi_D01G09501.gene			Ghi_A05G12076.gene		Ghi_A01G09531.gene
Ghi_A12G00936.gene	Ghi_D11G04146.gene	Ghi_A11G11901.gene			Ghi_A09G05866.gene		Ghi_D08G07541.gene
Ghi_D01G08321.gene	Ghi_D03G03936.gene	Ghi_D11G02401.gene			Ghi_A09G13741.gene		Ghi_A07G00706.gene
Ghi_A03G02226.gene	Ghi_D02G11676.gene	Ghi_A13G10101.gene			Ghi_D02G04946.gene		Ghi_A06G04656.gene
Ghi_A03G02221.gene	Ghi_A11G02266.gene	Ghi_D02G10336.gene			Ghi_A09G02071.gene		Ghi_A11G04346.gene
Ghi_D09G08261.gene	Ghi_D03G05081.gene	Ghi_D08G05276.gene			Ghi_A09G02076.gene		Ghi_D05G06981.gene
Ghi_A05G04581.gene	Ghi_A11G16876.gene	Ghi_A05G08416.gene			Ghi_D11G16256.gene		Ghi_A05G12921.gene
Ghi_A07G04841.gene	Ghi_D08G07571.gene	Ghi_D04G03726.gene			Ghi_D11G11201.gene		Ghi_A09G06791.gene
Ghi_A02G00716.gene	Ghi_D12G12406.gene	Ghi_A05G16556.gene			Ghi_A09G14691.gene		Ghi_A11G01446.gene
Ghi_A11G05386.gene	Ghi_D12G15751.gene	Ghi_D01G06066.gene			Ghi_D11G07436.gene		Ghi_D12G00146.gene
Ghi_A07G07631.gene	Ghi_D01G09206.gene	Ghi_D02G13156.gene			Ghi_A07G02341.gene		Ghi_A11G17736.gene
Ghi_A05G04631.gene	Ghi_A11G05771.gene	Ghi_A05G05156.gene			Ghi_A11G01871.gene		Ghi_A05G08126.gene
Ghi_A06G01156.gene	Ghi_A13G10201.gene	Ghi_D01G00946.gene			Ghi_D04G06511.gene		Ghi_A12G02151.gene
Ghi_D11G08006.gene	Ghi_D06G10081.gene	Ghi_A13G11331.gene			Ghi_A13G12886.gene		Ghi_A11G06236.gene
Ghi_A05G10986.gene	Ghi_A05G01456.gene	Ghi_A03G07151.gene			Ghi_D06G02326.gene		Ghi_D05G08116.gene
Ghi_D01G00951.gene	Ghi_D11G11421.gene	Ghi_A09G00371.gene			Ghi_A03G10221.gene		Ghi_D12G08436.gene
Ghi_D11G16881.gene	Ghi_D05G04736.gene	Ghi_A06G10866.gene			Ghi_D13G07301.gene		Ghi_D12G07861.gene
Ghi_A05G07586.gene	Ghi_D08G09571.gene	Ghi_A03G06681.gene			Ghi_D12G02901.gene		Ghi_A13G13891.gene
Ghi_A10G07926.gene	Ghi_A11G13331.gene	Ghi_D12G07181.gene			Ghi_A08G12751.gene		Ghi_A10G05141.gene
Ghi_A05G06676.gene	Ghi_A09G14391.gene	Ghi_D09G03666.gene			Ghi_A10G13616.gene		Ghi_A07G09641.gene
Ghi_A07G07971.gene	Ghi_A05G22571.gene	Ghi_A12G09686.gene			Ghi_D12G14656.gene		Ghi_A04G02246.gene
Ghi_D09G08886.gene	Ghi_D04G02136.gene	Ghi_D10G12991.gene			Ghi_A05G02371.gene		Ghi_A07G09646.gene
Ghi_D03G01346.gene	Ghi_A03G03951.gene	Ghi_A08G13386.gene			Ghi_A13G00481.gene		Ghi_A10G07431.gene
Ghi_A05G03001.gene	Ghi_A12G09361.gene	Ghi_A09G10491.gene			Ghi_A11G09441.gene		Ghi_A11G07181.gene
Ghi_A12G14646.gene	Ghi_A08G04801.gene	Ghi_A05G10756.gene			Ghi_A13G05976.gene		Ghi_A02G04006.gene
Ghi_A11G09051.gene	Ghi_A01G06361.gene	Ghi_A06G09081.gene			Ghi_D12G09811.gene		Ghi_A05G00731.gene
Ghi_D05G07361.gene	Ghi_A05G08351.gene	Ghi_A01G10321.gene			Ghi_A07G01701.gene		Ghi_A03G11596.gene
Ghi_D05G08351.gene	Ghi_D07G00846.gene	Ghi_D02G06896.gene			Ghi_A08G11281.gene		Ghi_A05G05751.gene
Ghi_D13G12226.gene	Ghi_A07G10851.gene	Ghi_D05G09881.gene			Ghi_D11G09446.gene		Ghi_D05G05476.gene
Ghi_A11G07526.gene	Ghi_D10G07251.gene	Ghi_D10G03411.gene			Ghi_D12G15236.gene		Ghi_A10G12576.gene
Ghi_D13G12221.gene	Ghi_A06G00341.gene	Ghi_D10G01901.gene			Ghi_D13G13466.gene		Ghi_A07G08511.gene
Ghi_A12G01681.gene	Ghi_A11G14781.gene	Ghi_D06G10421.gene			Ghi_A12G00801.gene		Ghi_A08G13931.gene
Ghi_D02G04966.gene	Ghi_D11G17586.gene	Ghi_D08G13001.gene			Ghi_A12G07856.gene		Ghi_A05G12156.gene
Ghi_A05G14606.gene	Ghi_A06G01431.gene	Ghi_D12G14936.gene			Ghi_A12G03571.gene		Ghi_A08G11891.gene
Ghi_D05G02356.gene	Ghi_A09G12066.gene	Ghi_D13G00986.gene			Ghi_D09G05546.gene		Ghi_A05G11491.gene
Ghi_A08G06521.gene	Ghi_A07G00711.gene	Ghi_A03G06336.gene			Ghi_D05G11231.gene		Ghi_A12G11111.gene
Ghi_D13G06911.gene	Ghi_A05G16936.gene	Ghi_D12G12896.gene			Ghi_A07G11956.gene		Ghi_D09G08626.gene
Ghi_D13G06916.gene	Ghi_D13G10616.gene	Ghi_A09G04126.gene			Ghi_D02G03426.gene		Ghi_D10G10491.gene
Ghi_D08G08226.gene	Ghi_A08G11086.gene	Ghi_D05G08691.gene			Ghi_D10G12366.gene		Ghi_A06G08416.gene
Ghi_A05G02351.gene	Ghi_A02G06696.gene	Ghi_A07G05846.gene			Ghi_A02G04386.gene		Ghi_A03G08956.gene
Ghi_A03G00486.gene	Ghi_D10G06646.gene	Ghi_D04G08816.gene			Ghi_A08G06236.gene		Ghi_A01G09271.gene
Ghi_A06G12886.gene	Ghi_A03G01716.gene	Ghi_D01G10091.gene			Ghi_A05G02081.gene		Ghi_A06G03206.gene
Ghi_A12G00486.gene	Ghi_D13G10351.gene	Ghi_D13G00191.gene			Ghi_A06G08846.gene		Ghi_D12G06381.gene
Ghi_A05G03916.gene	Ghi_A05G20176.gene	Ghi_A13G09286.gene			Ghi_A05G03131.gene		Ghi_D03G09281.gene
Ghi_A05G15801.gene	Ghi_D09G11736.gene	Ghi_A13G09281.gene			Ghi_A12G14736.gene		Ghi_A08G00401.gene
Ghi_A12G08306.gene	Ghi_A05G15516.gene	Ghi_A02G08461.gene			Ghi_A12G14731.gene		Ghi_A13G01186.gene
Ghi_A03G00151.gene	Ghi_A06G09421.gene	Ghi_D04G07466.gene			Ghi_D04G01831.gene		Ghi_D05G00981.gene
Ghi_D02G10031.gene	Ghi_A10G14266.gene	Ghi_D05G14546.gene			Ghi_A03G00976.gene		Ghi_A11G05241.gene
Ghi_A13G09836.gene	Ghi_D06G01306.gene	Ghi_D09G10651.gene			Ghi_D10G12986.gene		Ghi_D09G11621.gene
Ghi_D10G10891.gene	Ghi_D06G01301.gene	Ghi_D03G06171.gene			Ghi_A12G09546.gene		Ghi_D05G14191.gene
Ghi_D09G06371.gene	Ghi_D07G12801.gene	Ghi_D12G08221.gene			Ghi_D02G05141.gene		Ghi_A06G12916.gene
Ghi_A11G11371.gene	Ghi_A08G15061.gene	Ghi_A04G01421.gene			Ghi_A12G12776.gene		Ghi_A07G12186.gene
Ghi_A01G06616.gene	Ghi_D08G06291.gene	Ghi_A09G11431.gene			Ghi_A05G13186.gene		Ghi_D10G12396.gene
Ghi_A07G14001.gene	Ghi_D05G02216.gene	Ghi_A10G12401.gene			Ghi_D11G05601.gene		Ghi_A08G13056.gene
Ghi_A05G10616.gene	Ghi_A06G00926.gene	Ghi_D07G02171.gene			Ghi_D02G04811.gene		Ghi_A07G09366.gene
Ghi_A05G10611.gene	Ghi_D03G07501.gene	Ghi_A10G09191.gene			Ghi_D07G12761.gene		Ghi_D02G01126.gene
Ghi_A05G19971.gene	Ghi_A03G12991.gene	Ghi_A01G04151.gene			Ghi_A07G13446.gene		Ghi_A03G11516.gene
Ghi_D11G16406.gene	Ghi_A09G04691.gene	Ghi_D06G03116.gene			Ghi_A09G08316.gene		Ghi_D04G09516.gene
Ghi_A07G05721.gene	Ghi_D05G06011.gene	Ghi_D05G07021.gene			Ghi_A12G12196.gene		Ghi_A05G22001.gene
Ghi_A12G07681.gene	Ghi_A10G02056.gene	Ghi_D02G08601.gene			Ghi_A10G12201.gene		Ghi_A11G10276.gene
Ghi_A13G01441.gene	Ghi_D11G04656.gene	Ghi_A07G07961.gene			Ghi_A09G11706.gene		Ghi_D05G02461.gene
Ghi_A04G01776.gene	Ghi_D11G18131.gene	Ghi_A11G04031.gene			Ghi_A06G12461.gene		Ghi_A03G12351.gene
Ghi_A05G21941.gene	Ghi_A05G00171.gene	Ghi_A05G01556.gene			Ghi_A03G12076.gene		Ghi_A06G11231.gene
Ghi_A05G05516.gene	Ghi_A10G11751.gene	Ghi_A13G02756.gene			Ghi_D04G10041.gene		Ghi_A13G02271.gene
Ghi_D09G07426.gene	Ghi_D13G08711.gene	Ghi_D01G09161.gene			Ghi_D07G11231.gene		Ghi_D11G07196.gene
Ghi_A10G13791.gene	Ghi_D01G03091.gene	Ghi_A11G18661.gene			Ghi_A12G07441.gene		Ghi_D11G06826.gene
Ghi_A05G19396.gene	Ghi_A11G01981.gene	Ghi_D13G09891.gene			Ghi_D01G07676.gene		Ghi_D11G06821.gene
Ghi_A05G19391.gene	Ghi_D08G00416.gene	Ghi_D03G02821.gene			Ghi_A02G03446.gene		Ghi_A03G13006.gene
Ghi_D10G13101.gene	Ghi_D04G10296.gene	Ghi_A13G13631.gene			Ghi_D01G04591.gene		Ghi_A08G08966.gene
Ghi_A11G15896.gene	Ghi_D04G01101.gene	Ghi_A13G12581.gene			Ghi_D02G10496.gene		Ghi_D02G10766.gene
Ghi_A12G10881.gene	Ghi_D05G08101.gene	Ghi_A05G06121.gene			Ghi_D01G04596.gene		Ghi_D05G09551.gene
Ghi_D01G10566.gene	Ghi_D01G00016.gene	Ghi_D11G12056.gene			Ghi_D05G05871.gene		Ghi_D07G10056.gene
Ghi_A05G11561.gene	Ghi_A06G11106.gene	Ghi_D05G04071.gene			Ghi_A11G17826.gene		Ghi_A03G10586.gene
Ghi_A09G10866.gene	Ghi_D12G08671.gene	Ghi_D09G07886.gene			Ghi_D02G11366.gene		Ghi_D05G00176.gene
Ghi_A07G10786.gene	Ghi_D02G01081.gene	Ghi_A02G01741.gene			Ghi_A07G10491.gene		Ghi_A09G01871.gene
Ghi_A07G10781.gene	Ghi_A05G07426.gene	Ghi_D13G08061.gene			Ghi_D12G11056.gene		Ghi_D06G06136.gene
Ghi_D01G10561.gene	Ghi_D02G06796.gene	Ghi_D13G11631.gene			Ghi_A05G05206.gene		Ghi_A05G06381.gene
Ghi_D01G02201.gene	Ghi_A08G10491.gene	Ghi_A02G07961.gene			Ghi_A05G05201.gene		Ghi_A09G00191.gene
Ghi_D02G08191.gene	Ghi_A10G01356.gene	Ghi_D07G10346.gene			Ghi_D07G12571.gene		Ghi_A05G16446.gene
Ghi_A06G10241.gene	Ghi_A12G01291.gene	Ghi_A13G09361.gene			Ghi_A12G11576.gene		Ghi_A11G03421.gene
Ghi_D03G00631.gene	Ghi_D13G10396.gene	Ghi_D07G05721.gene			Ghi_A12G06791.gene		Ghi_D05G01226.gene
Ghi_A01G03221.gene	Ghi_A08G11066.gene	Ghi_D09G05241.gene			Ghi_A01G10331.gene		Ghi_A11G14566.gene
Ghi_A09G10916.gene	Ghi_A07G02491.gene	Ghi_D10G03681.gene			Ghi_D07G05181.gene		Ghi_A09G07321.gene
[truncated: 11,573 more rows]

## Sheet: Supplemental Figure 3
	Sample	Genes	Internal reference genes	Relative expression level
[truncated: 120 more rows]
